# Supplementary material for: The Proteomic Landscape of the Suprachiasmatic Nucleus Clock Reveals Large-Scale Coordination of Key Biological Processes
Source: PLoS Genet. 2014 Oct 16;10(10):e1004695. doi: 10.1371/journal.pgen.1004695 (PMC4199512; doi:10.1371/journal.pgen.1004695)
Supplement: Table S2 — The SCN proteome. The list of 2112 accurately quantified proteins representing the SCN proteome. This list was generated by filtering the raw protein dataset (3275 identified proteins) for only those proteins which were identified by a minimum of two peptide ratio counts and for which accurate quantification values were obtained in a minimum of 12 out of 24 independent samples. (XLSX) [file pgen.1004695.s006.xlsx]

## Sheet: Sheet1
Ratio L/H normalized CT2_Mouse#1	Ratio L/H normalized CT2_Mouse#2	Ratio L/H normalized CT2_Mouse#3	Ratio L/H normalized CT2_Mouse#4	Ratio L/H normalized CT6_Mouse#1	Ratio L/H normalized CT6_Mouse#2	Ratio L/H normalized CT6_Mouse#3	Ratio L/H normalized CT6_Mouse#4	Ratio L/H normalized CT10_Mouse#1	Ratio L/H normalized CT10_Mouse#2	Ratio L/H normalized CT10_Mouse#3	Ratio L/H normalized CT10_Mouse#4	Ratio L/H normalized CT14_Mouse#1	Ratio L/H normalized CT14_Mouse#2	Ratio L/H normalized CT14_Mouse#3	Ratio L/H normalized CT14_Mouse#4	Ratio L/H normalized CT18_Mouse#1	Ratio L/H normalized CT18_Mouse#2	Ratio L/H normalized CT18_Mouse#3	Ratio L/H normalized CT18_Mouse#4	Ratio L/H normalized CT22_Mouse#1	Ratio L/H normalized CT22_Mouse#2	Ratio L/H normalized CT22_Mouse#3	Ratio L/H normalized CT22_Mouse#4	order	ANOVA value	Proteins	Razor + unique peptides	Peptides	Unique peptides	Gene names	Protein names	Majority protein IDs	Protein IDs	Uniprot numbers	Fasta headers
4.46309	2.91367	1.8948	3.08966	4.93754	3.56392	4.85956	3.45925	2.56312	1.8058	1.90476	2.51332	3.80807	6.4658	4.53083	5.89171	3.08423	3.07834	NaN	4.98927	5.33419	4.33802	4.25188	6.88137	1	0.00098621	3	9;9;9	9	9	Negr1	Neuronal growth regulator 1	IPI00330887;IPI00467747;IPI00856781	IPI00330887;IPI00467747;IPI00856781	Q80Z24	>IPI:IPI00330887.1|SWISS-PROT:Q80Z24|ENSEMBL:ENSMUSP00000073664|REFSEQ:NP_001034183|VEGA:OTTMUSP00000028476 Tax_Id=10090 Gene_Symbol=Negr1 Neuronal growth regulator 1;>IPI:IPI00467747.2|TREMBL:A0A4W9|ENSEMBL:ENSMUSP00000041132|REFSEQ:NP_796248|VEGA:OTTMUSP
4.83933	4.08814	6.30795	8.49618	9.77135	6.74491	7.51089	7.14133	5.32964	5.52914	4.75715	6.60197	1.88374	3.78917	3.27976	2.6743	4.01091	4.24719	4.04416	12.9895	8.89284	12.0935	9.69274	8.3703	2	0.000867916	6	13;13;12;12;8;7	13	9	Sh3gl2	SH3-domain GRB2-like 2	IPI00648567;IPI00331110;IPI00648859;IPI00875665;IPI00649078;IPI00885527	IPI00648567;IPI00331110;IPI00648859;IPI00875665;IPI00649078;IPI00885527	A2ALV3	>IPI:IPI00648567.1|TREMBL:A2ALV3|ENSEMBL:ENSMUSP00000102806|VEGA:OTTMUSP00000008292 Tax_Id=10090 Gene_Symbol=Sh3gl2 SH3-domain GRB2-like 2;>IPI:IPI00331110.3|SWISS-PROT:Q62420|ENSEMBL:ENSMUSP00000030212|REFSEQ:NP_062408|VEGA:OTTMUSP00000008291 Tax_Id=10090
NaN	0.549753	1.20836	4.4958	8.00128	4.94854	6.01938	3.94648	5.54631	3.50275	2.02478	3.3728	2.02688	0.0643046	NaN	0.318198	3.36802	2.85274	4.88114	3.95179	11.8417	7.60688	7.87898	7.29661	3	0.000887719	2	7;6	7	7	Rasal1	RAS protein activator like 1	IPI00331543;IPI00130555	IPI00331543;IPI00130555	Q3TQ19;Q99K69	>IPI:IPI00331543.1|TREMBL:Q3TQ19;Q99K69|ENSEMBL:ENSMUSP00000031606;ENSMUSP00000123266|REFSEQ:NP_038860|VEGA:OTTMUSP00000031686;OTTMUSP00000031687 Tax_Id=10090 Gene_Symbol=Rasal1 RAS protein activator like 1;>IPI:IPI00130555.1|SWISS-PROT:Q9Z268 Tax_Id=10090
4.25767	6.27038	3.51927	4.59073	0.810438	0.983671	1.69371	1.02241	1.62217	2.40523	0.676727	0.804764	6.18468	8.62366	10.4116	10.2321	2.64361	1.21161	1.67015	2.78482	1.19192	1.99156	0.38838	1.89602	4	1.34315e-05	5	6;6;6;5;5	6	6	Chchd6	Coiled-coil-helix-coiled-coil-helix domain-containing protein 6	IPI00313390;IPI00955148;IPI00955145;IPI00874402;IPI00458795	IPI00313390;IPI00955148;IPI00955145;IPI00874402;IPI00458795	Q91VN4	>IPI:IPI00313390.3|SWISS-PROT:Q91VN4 Tax_Id=10090 Gene_Symbol=Chchd6 Coiled-coil-helix-coiled-coil-helix domain-containing protein 6;>IPI:IPI00955148.1|TREMBL:Q3TJS8;Q3UNQ1;Q9D5I5;Q9DA45;Q9DAM8|ENSEMBL:ENSMUSP00000032172|REFSEQ:NP_079627 Tax_Id=10090 Gene_
0.0503956	0.0498206	0.0516102	0.0529101	0.042526	0.0486713	0.0459137	0.0440025	0.110825	0.141068	0.126896	0.216155	0.0636051	0.0396102	0.0444701	0.0316155	0.108776	0.0321368	0.0501404	0.0595132	0.0372953	0.0870852	0.0379968	0.0434386	5	0.000315141	9	11;11;6;5;5;5;5;4;1	11	6	LOC100045189;YBX1	similar to transcription factor EF1	IPI00849786;IPI00120886;IPI00647981	IPI00849786;IPI00120886;IPI00647981;IPI00131034;IPI00896734;IPI00849342;IPI00553286;IPI00623394;IPI00136146	Q3UBT1	>IPI:IPI00849786.1|REFSEQ:XP_001473871 Tax_Id=10090 Gene_Symbol=LOC100045189 similar to transcription factor EF1;>IPI:IPI00120886.3|SWISS-PROT:P62960|TREMBL:Q3UBT1;Q60950;Q60951;Q71V06;Q810K5;Q8BRJ5|ENSEMBL:ENSMUSP00000078589|REFSEQ:NP_035862|VEGA:OTTMUSP0
4.61958	2.85959	3.00978	1.48111	0.3367	0.290225	0.26322	0.393918	0.304757	0.296007	NaN	NaN	0.927042	1.22742	0.29036	0.505919	0.361991	0.336746	0.376308	0.360867	0.341006	0.14439	0.331818	0.372051	6	3.73062e-06	3	6;6;6	6	6	Zyx	Zyxin	IPI00228360;IPI00387422;IPI00408218	IPI00228360;IPI00387422;IPI00408218	Q62523	>IPI:IPI00228360.3|SWISS-PROT:Q62523 Tax_Id=10090 Gene_Symbol=Zyx Zyxin;>IPI:IPI00387422.3|TREMBL:Q3TCR9;Q3UGQ3;Q8CBM0;Q8CD55|ENSEMBL:ENSMUSP00000070427|REFSEQ:NP_035907 Tax_Id=10090 Gene_Symbol=Zyx zyxin;>IPI:IPI00408218.1|TREMBL:Q7TQE2|ENSEMBL:ENSMUSP000
4.04645	2.58018	2.23189	6.44496	7.91202	4.29682	5.73197	4.97513	5.40102	6.55566	4.41989	6.53082	13.869	9.18358	13.4613	9.76086	4.61638	4.12865	6.26096	4.15317	9.44822	6.27313	7.94407	6.11322	7	0.000301183	2	6;6	6	6	Gbas	Protein NipSnap homolog 2	IPI00115827;IPI00651782	IPI00115827;IPI00651782	O55126	>IPI:IPI00115827.1|SWISS-PROT:O55126 Tax_Id=10090 Gene_Symbol=Gbas Protein NipSnap homolog 2;>IPI:IPI00651782.2|TREMBL:Q3TD78;Q7TMG8|ENSEMBL:ENSMUSP00000083211;ENSMUSP00000117705|REFSEQ:NP_032121|VEGA:OTTMUSP00000034566;OTTMUSP00000034567 Tax_Id=10090 Gene
6.82594	2.89168	2.19679	4.72903	9.15332	3.38696	11.2844	5.63063	7.41015	7.4599	11.3825	12.6573	1.87561	1.49551	2.48466	2.30563	4.54669	2.04558	NaN	4.29664	9.48947	10.7629	12.8747	12.5541	8	4.61467e-05	9	7;1;1;1;1;1;1;1;1	7	6	Slc17a6	Vesicular glutamate transporter 2	IPI00120342	IPI00120342;IPI00221470;IPI00648076;IPI00127655;IPI00828480;IPI00459478;IPI00857524;IPI00652529;IPI00515630	Q8BLE7	>IPI:IPI00120342.6|SWISS-PROT:Q8BLE7|ENSEMBL:ENSMUSP00000032710|REFSEQ:NP_543129 Tax_Id=10090 Gene_Symbol=Slc17a6 Vesicular glutamate transporter 2
0.214809	NaN	0.215834	NaN	3.51247	3.93654	3.64272	4.42968	1.97985	1.9793	1.79256	NaN	NaN	0.518403	NaN	NaN	NaN	3.5629	1.96221	NaN	2.2317	NaN	NaN	NaN	9	1.88033e-06	3	5;2;1	5	5	Nat10	N-acetyltransferase 10	IPI00276866	IPI00276866;IPI00753034;IPI00460675	Q8K224	>IPI:IPI00276866.1|SWISS-PROT:Q8K224|ENSEMBL:ENSMUSP00000028608|REFSEQ:NP_694766|VEGA:OTTMUSP00000015801 Tax_Id=10090 Gene_Symbol=Nat10 N-acetyltransferase 10
0.546001	NaN	0.557818	NaN	1.35566	1.22326	1.06283	1.20208	NaN	NaN	1.00273	NaN	1.28322	1.7768	1.29482	1.72304	NaN	1.19748	NaN	NaN	0.926526	0.882846	1.22954	1.02645	10	5.98574e-05	5	4;4;4;4;2	4	4	Stk38l	Isoform 2 of Serine/threonine-protein kinase 38-like	IPI00515183;IPI00895990;IPI00453705;IPI00895988;IPI00849557	IPI00515183;IPI00895990;IPI00453705;IPI00895988;IPI00849557	Q7TSE6-2	>IPI:IPI00515183.1|SWISS-PROT:Q7TSE6-2 Tax_Id=10090 Gene_Symbol=Stk38l Isoform 2 of Serine/threonine-protein kinase 38-like;>IPI:IPI00895990.1|TREMBL:B2KFR5|ENSEMBL:ENSMUSP00000107271|VEGA:OTTMUSP00000031179;OTTMUSP00000042629 Tax_Id=10090 Gene_Symbol=Stk3
10.0226	6.55179	6.13158	9.17515	11.8248	14.2175	8.84643	10.4692	16.1142	20.0852	16.4026	17.8613	3.24538	5.37982	5.07408	8.03019	8.38645	12.1966	14.0924	10.9691	9.28074	13.7084	9.61446	11.3076	11	2.54669e-05	3	5;5;2	5	4	Vamp2	Vesicle-associated membrane 2	IPI00880852;IPI00229703	IPI00880852;IPI00229703;IPI00132276	B0QZN5;O35619	>IPI:IPI00880852.1|TREMBL:B0QZN5;O35619|ENSEMBL:ENSMUSP00000112611|VEGA:OTTMUSP00000035737 Tax_Id=10090 Gene_Symbol=Vamp2 Vesicle-associated membrane 2;>IPI:IPI00229703.6|SWISS-PROT:P63044|TREMBL:Q8CHR4|ENSEMBL:ENSMUSP00000021273|REFSEQ:NP_033523|VEGA:OTTM
0.216198	0.348056	0.341728	NaN	2.6824	2.35045	1.39218	1.75217	1.72801	2.11658	2.67716	2.1926	0.451957	0.261158	0.208364	0.233133	NaN	0.600384	0.79466	NaN	0.277963	0.192756	0.31141	2.56088	12	0.000308371	5	4;1;1;1;1	7	4	Sec23b	Protein transport protein Sec23B	IPI00317604	IPI00317604;IPI00654289;IPI00756981;IPI00752742;IPI00750843	Q9D662	>IPI:IPI00317604.1|SWISS-PROT:Q9D662|TREMBL:Q3TAW4;Q3TIS3;Q3TYS4;Q3UKB4;Q8CDS4|ENSEMBL:ENSMUSP00000028916|REFSEQ:NP_062761|VEGA:OTTMUSP00000004231 Tax_Id=10090 Gene_Symbol=Sec23b Protein transport protein Sec23B
0.242207	0.546568	0.484051	0.608865	0.204541	0.263179	0.225973	0.42889	0.206147	NaN	0.1676	0.18113	0.669972	0.445812	1.18395	0.491328	0.248361	0.322134	0.396637	0.265823	0.204248	0.142896	0.194621	0.20504	13	0.000186932	5	3;3;3;3;2	3	3	Rpl34;Gm4705		IPI00466153;IPI00621625;IPI00461652;IPI00460103;IPI00848921	IPI00466153;IPI00621625;IPI00461652;IPI00460103;IPI00848921	Q9D1R9	>IPI:IPI00466153.4|SWISS-PROT:Q9D1R9|ENSEMBL:ENSMUSP00000078092;ENSMUSP00000086614|REFSEQ:NP_001005859;NP_081000;XP_001481222|VEGA:OTTMUSP00000027291;OTTMUSP00000027292 Tax_Id=10090 Gene_Symbol=Rpl34;Gm4705 60S ribosomal protein L34;>IPI:IPI00621625.1|TREM
0.0910084	0.0984737	0.0729394	0.104125	0.0559535	0.0520562	0.0458947	0.0439078	0.123162	0.0643708	0.135637	0.0805931	0.0598373	0.0516129	0.0492854	0.0605987	0.104291	0.0563666	0.0518135	0.101614	0.0468055	0.0540775	0.0560255	0.0516529	14	0.00121609	2	29;22	29	29	Mybbp1a	Myb-binding protein 1A	IPI00331361;IPI00652799	IPI00331361;IPI00652799	Q7TPV4	>IPI:IPI00331361.2|SWISS-PROT:Q7TPV4|TREMBL:A0JLT5;Q3U2W2|ENSEMBL:ENSMUSP00000044827|REFSEQ:NP_058056|VEGA:OTTMUSP00000006405 Tax_Id=10090 Gene_Symbol=Mybbp1a Myb-binding protein 1A;>IPI:IPI00652799.2|TREMBL:Q3TLF6|ENSEMBL:ENSMUSP00000098459 Tax_Id=10090 G
6.64761	3.90854	4.2821	6.87522	7.6266	8.20412	7.84991	4.46808	3.57028	3.5407	2.63151	4.08714	4.65376	6.17589	6.98129	7.07764	5.24659	4.95368	6.93145	6.61114	8.81057	6.05364	8.01539	11.1011	15	0.00125607	7	27;25;24;22;21;21;17	29	26	EPB41L1		IPI00465812;IPI00830613;IPI00480250;IPI00652972;IPI00831205;IPI00753967;IPI00405986	IPI00465812;IPI00830613;IPI00480250;IPI00652972;IPI00831205;IPI00753967;IPI00405986	Q9Z2H5-2	>IPI:IPI00465812.2|SWISS-PROT:Q9Z2H5-2|TREMBL:A2AUK5;B6ZHC9|ENSEMBL:ENSMUSP00000029155;ENSMUSP00000085926;ENSMUSP00000099424;ENSMUSP00000099425;ENSMUSP00000099426;ENSMUSP00000105199|REFSEQ:NP_001006665;NP_038538|VEGA:OTTMUSP00000016920;OTTMUSP00000016923;O
0.0617741	0.081103	0.116332	0.0646914	0.213817	0.0652614	0.122167	0.0860659	0.0872219	0.148836	0.134916	0.223349	0.0384497	0.0246865	0.0240923	0.0185161	0.136214	0.0827541	0.2602	0.108608	0.0774533	0.107694	0.105995	0.0957854	16	4.83438e-05	2	25;24	25	25	Ddx21	nucleolar RNA helicase 2	IPI00652987;IPI00120691	IPI00652987;IPI00120691	Q3TVJ3;Q3ULC7;Q6PCP0	>IPI:IPI00652987.3|TREMBL:Q3TVJ3;Q3ULC7;Q6PCP0;Q8K2L4;Q9CSR3;Q9CWZ5|ENSEMBL:ENSMUSP00000042691|REFSEQ:NP_062426 Tax_Id=10090 Gene_Symbol=Ddx21 nucleolar RNA helicase 2;>IPI:IPI00120691.3|SWISS-PROT:Q9JIK5 Tax_Id=10090 Gene_Symbol=Ddx21 Nucleolar RNA helica
8.4969	4.9613	4.07067	5.19696	8.07428	9.68054	7.30407	6.33593	7.61789	9.5066	9.51384	10.5763	2.94846	4.4082	5.97657	4.6644	4.35199	5.15969	6.80782	6.31512	11.2648	13.0054	11.8806	10.3992	17	4.35706e-05	4	22;16;7;6	25	22	Eno2	Gamma-enolase	IPI00331704;IPI00122684	IPI00331704;IPI00122684;IPI00830694;IPI00830788	P17183	>IPI:IPI00331704.7|SWISS-PROT:P17183|TREMBL:Q3UJ20;Q545V3|ENSEMBL:ENSMUSP00000004378|REFSEQ:NP_038537|VEGA:OTTMUSP00000025146 Tax_Id=10090 Gene_Symbol=Eno2 Gamma-enolase;>IPI:IPI00122684.2|TREMBL:D3Z6E4;Q922A0|ENSEMBL:ENSMUSP00000072634;ENSMUSP00000108095|
11.1285	5.77034	5.75407	4.71476	10.3712	8.07167	7.97893	5.96765	14.226	11.5871	8.74279	13.2615	3.27429	4.13839	6.93674	5.54754	9.58773	7.50075	9.74944	6.50153	13.0832	10.2965	9.42596	17.368	18	0.00114537	6	20;11;8;7;5;3	20	20	Ckmt1	Creatine kinase U-type, mitochondrial	IPI00128296;IPI00752420	IPI00128296;IPI00752420;IPI00856789;IPI00856870;IPI00857055;IPI00120076	P30275	>IPI:IPI00128296.1|SWISS-PROT:P30275|TREMBL:Q545N7|ENSEMBL:ENSMUSP00000000317;ENSMUSP00000077349|REFSEQ:NP_034027|VEGA:OTTMUSP00000016245;OTTMUSP00000016246 Tax_Id=10090 Gene_Symbol=Ckmt1 Creatine kinase U-type, mitochondrial;>IPI:IPI00752420.1|TREMBL:A2AR
2.03641	1.27492	0.781555	1.6177	1.022	1.03887	0.576934	0.327182	0.945716	1.3511	1.89047	3.27472	NaN	6.61901	12.8893	3.21626	2.68832	11.2729	NaN	3.56011	1.68594	1.51242	1.53986	1.35336	19	0.000347704	5	2;2;2;2;2	2	2	Slc44a1	Isoform 2 of Choline transporter-like protein 1	IPI00421237;IPI00828826;IPI00648678;IPI00648633;IPI00648270	IPI00421237;IPI00828826;IPI00648678;IPI00648633;IPI00648270	Q6X893-2	>IPI:IPI00421237.1|SWISS-PROT:Q6X893-2 Tax_Id=10090 Gene_Symbol=Slc44a1 Isoform 2 of Choline transporter-like protein 1;>IPI:IPI00828826.1|TREMBL:A2AMH4;D3YZT6|ENSEMBL:ENSMUSP00000030120;ENSMUSP00000103274|VEGA:OTTMUSP00000007477 Tax_Id=10090 Gene_Symbol=S
5.29296	6.50533	4.90485	14.8951	5.44544	6.06943	7.34376	4.24034	9.72763	10.666	11.8308	13.7773	3.84423	3.35999	4.87686	5.13584	4.85319	7.90327	4.99675	4.1834	10.7896	9.44822	6.74445	9.81547	20	0.00127454	2	3;2	3	2	S100a1	protein S100-A1	IPI00126175;IPI00554983	IPI00126175;IPI00554983	Q91V77;Q9D3M4;Q9JL08	>IPI:IPI00126175.2|TREMBL:Q91V77;Q9D3M4;Q9JL08|ENSEMBL:ENSMUSP00000058237|REFSEQ:NP_035439|VEGA:OTTMUSP00000024891 Tax_Id=10090 Gene_Symbol=S100a1 protein S100-A1;>IPI:IPI00554983.2|SWISS-PROT:P56565 Tax_Id=10090 Gene_Symbol=S100a1 Protein S100-A1
9.26698	5.72869	5.59816	6.70151	9.48227	10.726	11.1643	7.00378	7.35186	7.59994	7.70891	7.818	3.38731	5.98551	6.73854	7.7991	7.85669	7.10681	10.7354	7.91264	10.3049	17.145	11.6986	13.9499	21	0.00148537	7	24;24;8;8;8;4;3	24	17	Camk2a	Putative uncharacterized protein Camk2a	IPI00420725;IPI00621806	IPI00420725;IPI00621806;IPI00874363;IPI00230096;IPI00830424;IPI00754301;IPI00749647	D3Z2V9;Q80TN1	>IPI:IPI00420725.4|TREMBL:D3Z2V9;Q80TN1|ENSEMBL:ENSMUSP00000025519|VEGA:OTTMUSP00000017499 Tax_Id=10090 Gene_Symbol=Camk2a Putative uncharacterized protein Camk2a;>IPI:IPI00621806.2|SWISS-PROT:P11798-1|ENSEMBL:ENSMUSP00000099952|REFSEQ:NP_803126|VEGA:OTTMU
0.14106	0.157706	0.17793	0.202577	0.112456	0.108618	0.0880669	0.163605	0.441131	0.183688	0.448793	0.365925	0.228139	0.13428	0.140588	0.111283	0.132025	0.142128	0.153114	0.123054	0.10581	0.139929	0.125507	0.0938087	22	0.000122013	2	12;11	12	12	Nsun2	Isoform 1 of tRNA (cytosine-5-)-methyltransferase NSUN2	IPI00894870;IPI00850580	IPI00894870;IPI00850580	Q1HFZ0-1	>IPI:IPI00894870.1|SWISS-PROT:Q1HFZ0-1|ENSEMBL:ENSMUSP00000105321|REFSEQ:NP_663329|VEGA:OTTMUSP00000043252 Tax_Id=10090 Gene_Symbol=Nsun2 Isoform 1 of tRNA (cytosine-5-)-methyltransferase NSUN2;>IPI:IPI00850580.1|SWISS-PROT:Q1HFZ0-2|ENSEMBL:ENSMUSP00000022
4.19498	3.65283	4.10981	4.23909	3.70535	3.29685	2.96498	3.53469	2.74138	2.14082	1.76121	1.63231	4.0833	3.39513	3.71761	3.62963	3.74294	3.59609	3.77644	4.11066	2.85063	3.02188	2.75376	4.21266	23	1.78041e-05	3	24;24;24	24	11	Map4; Mtap4	Isoform 1 of Microtubule-associated protein 4	IPI00408119;IPI00848818;IPI00473748	IPI00408119;IPI00848818;IPI00473748	P27546-1	>IPI:IPI00408119.6|SWISS-PROT:P27546-1|ENSEMBL:ENSMUSP00000035055 Tax_Id=10090 Gene_Symbol=Mtap4 Isoform 1 of Microtubule-associated protein 4;>IPI:IPI00848818.1|SWISS-PROT:P27546-2|REFSEQ:NP_032659 Tax_Id=10090 Gene_Symbol=Mtap4 microtubule-associated pro
3.94197	2.56865	4.36757	3.8373	8.22368	5.19265	9.46074	2.71584	3.57003	6.53296	8.09848	4.95663	0.957396	1.7542	1.02726	4.00705	5.35877	8.19269	7.01164	4.80008	7.92205	9.49938	7.86163	7.66636	24	0.000427988	3	11;10;6	11	11	Palm	Isoform 1 of Paralemmin	IPI00129298;IPI00323809;IPI00968334	IPI00129298;IPI00323809;IPI00968334	Q9Z0P4-1	>IPI:IPI00129298.1|SWISS-PROT:Q9Z0P4-1|TREMBL:Q6ZQE7;Q8CB16|ENSEMBL:ENSMUSP00000040596|REFSEQ:NP_075617 Tax_Id=10090 Gene_Symbol=Palm Isoform 1 of Paralemmin;>IPI:IPI00323809.3|SWISS-PROT:Q9Z0P4-2|TREMBL:Q3TRX4;Q542N8;Q91WF5|ENSEMBL:ENSMUSP00000101018|REFS
4.22529	3.42642	2.74695	3.29565	5.2521	3.48772	5.07821	4.86003	4.28064	3.78716	2.91435	4.24646	2.90082	3.42454	3.03049	4.86216	5.53833	5.41917	5.92242	7.36269	6.56211	9.03751	13.9503	8.21018	25	1.86094e-05	7	12;11;8;7;4;3;2	12	10	Sirpa	tyrosine-protein phosphatase non-receptor type substrate 1 isoform	IPI00876489;IPI00775779;IPI00221791;IPI00129158	IPI00876489;IPI00775779;IPI00221791;IPI00129158;IPI00221792;IPI00756790;IPI00462152	Q2M4I8;Q6P6I8	>IPI:IPI00876489.1|TREMBL:Q2M4I8;Q6P6I8|ENSEMBL:ENSMUSP00000099491;ENSMUSP00000099492|REFSEQ:NP_001171117;NP_031573|VEGA:OTTMUSP00000016520;OTTMUSP00000016522 Tax_Id=10090 Gene_Symbol=Sirpa tyrosine-protein phosphatase non-receptor type substrate 1 isoform
1.47145	2.30049	2.39912	2.44081	2.11189	1.79495	1.58932	2.18584	1.6491	1.36966	1.31683	1.52898	3.9917	2.88451	2.36245	1.76013	3.36576	1.72694	2.97646	2.02947	0.858074	0.698422	1.68708	0.915499	26	0.000756148	3	10;8;8	10	10	Chchd3	Putative uncharacterized protein Chchd3	IPI00751223;IPI00133562;IPI00754739	IPI00751223;IPI00133562;IPI00754739	D3Z0L4	>IPI:IPI00751223.1|TREMBL:D3Z0L4|ENSEMBL:ENSMUSP00000123220|VEGA:OTTMUSP00000015633 Tax_Id=10090 Gene_Symbol=Chchd3 Putative uncharacterized protein Chchd3;>IPI:IPI00133562.1|SWISS-PROT:Q9CRB9|TREMBL:Q91VG6|ENSEMBL:ENSMUSP00000070149|REFSEQ:NP_079612|VEGA:
5.27899	2.67058	5.34331	3.45877	3.0755	5.34645	2.24281	1.7575	0.0352224	0.616827	0.01067	NaN	1.57513	2.759	4.97265	2.13083	3.05577	1.66176	2.45749	2.82056	2.23689	2.20877	4.87543	4.86145	27	4.23796e-05	7	10;7;7;5;4;4;1	10	10	Dclk1	Isoform 1 of Serine/threonine-protein kinase DCLK1	IPI00468380;IPI00474418;IPI00881493;IPI00119762	IPI00468380;IPI00474418;IPI00881493;IPI00119762;IPI00856810;IPI00761729;IPI00877290	Q9JLM8-1	>IPI:IPI00468380.4|SWISS-PROT:Q9JLM8-1|TREMBL:A3KN70;Q8CCN4;Q8CHG1|ENSEMBL:ENSMUSP00000050034|REFSEQ:NP_064362 Tax_Id=10090 Gene_Symbol=Dclk1 Isoform 1 of Serine/threonine-protein kinase DCLK1;>IPI:IPI00474418.1|TREMBL:Q1EDH1;Q8BQN2|ENSEMBL:ENSMUSP00000070
1.65388	3.08737	0.696621	2.36866	0.0678886	0.0835841	0.0868734	NaN	0.380547	NaN	0.254758	0.592382	0.123567	0.0438558	0.20024	0.386145	0.931446	NaN	0.372051	1.29811	3.04906	0.420239	0.53285	NaN	28	0.000535161	2	10;10	10	10	Rrm1	Ribonucleoside-diphosphate reductase large subunit	IPI00315127;IPI00331302	IPI00315127;IPI00331302	P07742	>IPI:IPI00315127.1|SWISS-PROT:P07742 Tax_Id=10090 Gene_Symbol=Rrm1 Ribonucleoside-diphosphate reductase large subunit;>IPI:IPI00331302.5|TREMBL:Q05DU8;Q6NZB3;Q91YM8|ENSEMBL:ENSMUSP00000033283|REFSEQ:NP_033129 Tax_Id=10090 Gene_Symbol=Rrm1 ribonucleoside-di
1.36625	5.42888	3.27944	2.48923	14.8183	3.62083	8.84017	10.7316	19.2175	13.4882	NaN	12.58	1.87112	2.33847	2.80686	4.40898	2.85616	5.16342	6.27589	2.60546	6.03209	2.63026	2.38067	6.11322	29	0.00117274	2	3;1	3	1	Dynll2	Dynein light chain 2, cytoplasmic	IPI00132734	IPI00132734;IPI00881953	Q9D0M5	>IPI:IPI00132734.1|SWISS-PROT:Q9D0M5|TREMBL:B2KGQ2|ENSEMBL:ENSMUSP00000020775;ENSMUSP00000103556|REFSEQ:NP_001161943;NP_001161944;NP_080832|VEGA:OTTMUSP00000001420;OTTMUSP00000042489 Tax_Id=10090 Gene_Symbol=Dynll2 Dynein light chain 2, cytoplasmic
4.62342	4.66962	5.61987	3.3206	2.49869	3.16636	2.45086	3.81534	6.4704	6.66622	7.24533	6.52784	3.37018	5.1164	4.28872	5.17116	3.51013	3.23604	3.16566	4.35901	3.97709	4.11404	4.10576	6.14288	30	0.000157866	2	3;3	41	0	Tuba1a	Tubulin alpha-1A chain	IPI00110753;IPI00466390	IPI00110753;IPI00466390	P68369	>IPI:IPI00110753.1|SWISS-PROT:P68369|ENSEMBL:ENSMUSP00000094778|REFSEQ:NP_035783|VEGA:OTTMUSP00000018539 Tax_Id=10090 Gene_Symbol=Tuba1a Tubulin alpha-1A chain;>IPI:IPI00466390.1|SWISS-PROT:P05214|TREMBL:Q5FW91|ENSEMBL:ENSMUSP00000084713;ENSMUSP00000085580
9.66557	5.07022	4.6215	6.90274	8.34933	8.22301	11.8915	7.40412	8.79275	8.4868	7.01066	10.3225	3.26317	3.93329	5.24687	4.63156	5.82309	7.39426	10.2092	7.77303	12.4612	9.3985	10.8543	11.4637	31	0.00017061	1	31	31	29	Ckb	Creatine kinase B-type	IPI00136703	IPI00136703	Q04447	>IPI:IPI00136703.1|SWISS-PROT:Q04447|ENSEMBL:ENSMUSP00000001304|REFSEQ:NP_067248 Tax_Id=10090 Gene_Symbol=Ckb Creatine kinase B-type
0.0590249	0.0484074	0.0434518	0.0580518	0.0377188	0.0372592	0.0387327	0.0393469	0.0560067	0.0816326	0.0666756	0.0822369	0.0503855	0.0324443	0.035868	0.0369004	0.049087	0.0363703	0.0400016	0.044964	0.0377202	0.0312598	0.0363597	0.0394789	32	1.71285e-05	1	25	25	24	Shmt2	Serine hydroxymethyltransferase	IPI00454008	IPI00454008	Q3TFD0;Q99K87;Q9CZN7	>IPI:IPI00454008.1|TREMBL:Q3TFD0;Q99K87;Q9CZN7|ENSEMBL:ENSMUSP00000026470|REFSEQ:NP_082506 Tax_Id=10090 Gene_Symbol=Shmt2 Serine hydroxymethyltransferase
5.77167	3.74911	4.02496	3.76818	5.5816	6.31512	7.58668	5.44514	6.79025	7.6746	7.10833	9.10664	3.64817	4.61638	7.7107	5.25459	5.53649	5.57786	6.14364	5.98587	8.43597	7.73515	8.27883	7.54091	33	0.000644246	1	24	32	24	Aldoc	Fructose-bisphosphate aldolase C	IPI00119458	IPI00119458	P05063	>IPI:IPI00119458.7|SWISS-PROT:P05063|TREMBL:B1AQE0|ENSEMBL:ENSMUSP00000017534;ENSMUSP00000099536|REFSEQ:NP_033787|VEGA:OTTMUSP00000000160;OTTMUSP00000000161 Tax_Id=10090 Gene_Symbol=Aldoc Fructose-bisphosphate aldolase C
9.40822	4.8377	4.38155	4.4833	9.3188	5.46747	6.22277	6.61332	6.75174	6.48256	5.40687	9.08183	2.44355	4.04465	4.73306	3.59402	6.60153	4.31984	7.20357	5.56143	10.541	11.6515	10.4204	11.6696	34	0.000235506	1	9	36	9	Tubb4a; Tubb4	Tubulin beta-4 chain	IPI00109073	IPI00109073	Q9D6F9	>IPI:IPI00109073.5|SWISS-PROT:Q9D6F9|ENSEMBL:ENSMUSP00000071135|REFSEQ:NP_033477 Tax_Id=10090 Gene_Symbol=Tubb4 Tubulin beta-4 chain
2.53865	3.03582	4.4825	5.14007	1.71356	1.65533	1.47682	2.00517	1.4076	1.17538	NaN	1.37548	3.77159	3.27493	3.2079	4.16545	4.84614	2.15671	1.67017	4.09266	3.57232	3.06617	3.43242	3.28893	35	0.000236918	1	9	9	9	Hsdl1	Inactive hydroxysteroid dehydrogenase-like protein 1	IPI00225301	IPI00225301	Q8BTX9	>IPI:IPI00225301.1|SWISS-PROT:Q8BTX9|ENSEMBL:ENSMUSP00000044371|REFSEQ:NP_780394 Tax_Id=10090 Gene_Symbol=Hsdl1 Inactive hydroxysteroid dehydrogenase-like protein 1
0.0747943	0.105435	0.0907605	0.129349	0.0511718	0.0734268	0.0895095	0.0775916	0.122826	0.156155	0.144823	0.126841	0.0613949	0.08259	0.0892857	0.053339	0.094224	0.0639427	0.114245	0.112197	0.0623558	0.0788208	0.058008	0.0495982	36	0.00079635	1	9	9	9	Cth	Cystathionine gamma-lyase	IPI00122344	IPI00122344	Q8VCN5	>IPI:IPI00122344.1|SWISS-PROT:Q8VCN5|TREMBL:D3Z570|ENSEMBL:ENSMUSP00000029830;ENSMUSP00000113672|REFSEQ:NP_666065|VEGA:OTTMUSP00000038207 Tax_Id=10090 Gene_Symbol=Cth Cystathionine gamma-lyase
6.02591	7.46436	10.9132	7.41509	45.5955	31.4189	14.7122	14.628	2.34165	2.97239	3.2329	3.51778	3.28785	3.33745	7.62834	10.5316	5.54293	9.87849	13.1869	5.92979	15.287	24.2777	30.54	14.941	37	1.13859e-05	1	6	6	6	Mobp	Isoform 1 of Myelin-associated oligodendrocyte basic protein	IPI00135106	IPI00135106	Q9D2P8-1	>IPI:IPI00135106.2|SWISS-PROT:Q9D2P8-1|ENSEMBL:ENSMUSP00000071084|REFSEQ:NP_001034454 Tax_Id=10090 Gene_Symbol=Mobp Isoform 1 of Myelin-associated oligodendrocyte basic protein
2.47225	NaN	0.457917	1.49356	0.292005	0.108695	NaN	0.115509	NaN	NaN	NaN	2.30192	2.85396	2.8816	6.60633	5.73296	NaN	0.154794	NaN	NaN	3.05549	1.22327	1.03081	NaN	38	0.00048272	1	7	7	6	Sv2b	Synaptic vesicle glycoprotein 2B	IPI00221456	IPI00221456	Q8BG39	>IPI:IPI00221456.1|SWISS-PROT:Q8BG39|ENSEMBL:ENSMUSP00000082254|REFSEQ:NP_001103223;NP_705807 Tax_Id=10090 Gene_Symbol=Sv2b Synaptic vesicle glycoprotein 2B
NaN	1.87733	1.25095	0.655953	12.044	7.97703	8.84486	5.98946	NaN	4.63027	7.34322	8.08146	1.13583	1.1932	NaN	1.94852	NaN	12.8823	NaN	NaN	8.89838	NaN	NaN	NaN	39	7.88239e-05	1	5	5	5	Ndufa2	NADH dehydrogenase [ubiquinone] 1 alpha subcomplex subunit 2	IPI00315302	IPI00315302	Q9CQ75	>IPI:IPI00315302.5|SWISS-PROT:Q9CQ75|ENSEMBL:ENSMUSP00000014438|REFSEQ:NP_035015 Tax_Id=10090 Gene_Symbol=Ndufa2 NADH dehydrogenase [ubiquinone] 1 alpha subcomplex subunit 2
0.241289	0.290293	0.391589	0.526067	2.52118	3.0567	NaN	2.61493	2.13374	2.42671	NaN	NaN	1.40799	0.930146	0.772678	0.518376	0.377415	3.11896	1.58728	0.376393	2.38789	2.40871	2.81841	1.97969	40	0.000747204	1	5	5	5	Exoc2	Exocyst complex component 2	IPI00655041	IPI00655041	Q9D4H1	>IPI:IPI00655041.2|SWISS-PROT:Q9D4H1|TREMBL:Q5SUZ6;Q8C984;Q8K2J3|ENSEMBL:ENSMUSP00000021785;ENSMUSP00000100010|REFSEQ:NP_079864|VEGA:OTTMUSP00000000619 Tax_Id=10090 Gene_Symbol=Exoc2 Exocyst complex component 2
13.4599	4.12422	2.32699	2.97592	7.70832	5.84693	4.48893	3.78472	0.940557	1.14317	1.65629	1.08579	1.77547	1.55766	1.5207	3.08794	2.89168	5.90633	7.65345	2.87662	5.02109	4.03568	6.40205	2.32959	41	0.00119373	1	5	32	5	Tuba4a	Tubulin alpha-4A chain	IPI00117350	IPI00117350	P68368	>IPI:IPI00117350.1|SWISS-PROT:P68368|ENSEMBL:ENSMUSP00000078429|REFSEQ:NP_033473 Tax_Id=10090 Gene_Symbol=Tuba4a Tubulin alpha-4A chain
4.28835	6.14931	4.58211	8.03859	4.67159	4.76032	6.55265	7.30407	3.16316	0.404744	2.51724	1.04277	4.56788	6.64761	6.53595	4.56142	4.61467	5.07846	3.15567	4.55415	6.88753	5.8596	NaN	4.85649	42	0.00149553	1	5	5	5	Prune	Protein prune homolog	IPI00453531	IPI00453531	Q8BIW1	>IPI:IPI00453531.2|SWISS-PROT:Q8BIW1|ENSEMBL:ENSMUSP00000015855|REFSEQ:NP_775482|VEGA:OTTMUSP00000025382 Tax_Id=10090 Gene_Symbol=Prune Protein prune homolog
3.66005	2.90672	2.86361	3.58989	2.75368	3.66206	3.22966	3.15816	NaN	0.521839	0.295972	NaN	1.48221	1.49289	2.55885	2.79501	2.61028	NaN	2.65576	4.52141	1.49216	0.747552	4.20115	NaN	43	0.00043673	1	4	4	4	Nudt2	Bis(5-nucleosyl)-tetraphosphatase [asymmetrical]	IPI00135345	IPI00135345	P56380	>IPI:IPI00135345.3|SWISS-PROT:P56380|TREMBL:A2ANN5;Q3V1C8|ENSEMBL:ENSMUSP00000030154|REFSEQ:NP_079815|VEGA:OTTMUSP00000007037 Tax_Id=10090 Gene_Symbol=Nudt2 Bis(5-nucleosyl)-tetraphosphatase [asymmetrical]
0.179125	0.285307	0.15702	0.185567	0.114683	0.085778	0.077238	0.103852	0.131041	0.128195	0.11908	0.118163	0.226619	0.278311	0.344364	0.203504	0.11487	0.0922849	0.210212	0.146017	0.0941	0.0488138	0.157156	0.149997	44	0.00146398	1	4	4	4	Clic1	Chloride intracellular channel protein 1	IPI00130344	IPI00130344	Q9Z1Q5	>IPI:IPI00130344.3|SWISS-PROT:Q9Z1Q5|TREMBL:Q3TIP8;Q542F1|ENSEMBL:ENSMUSP00000007257|REFSEQ:NP_254279 Tax_Id=10090 Gene_Symbol=Clic1 Chloride intracellular channel protein 1
0.191311	0.328591	0.322393	NaN	NaN	NaN	NaN	NaN	NaN	1.96294	1.68765	1.56023	NaN	0.170378	0.0735673	NaN	NaN	NaN	NaN	NaN	0.0743716	0.116055	0.272844	0.205804	45	0.000313808	2	4;1	4	4	Tyms	Thymidylate synthase	IPI00130734	IPI00130734;IPI00857689	P07607	>IPI:IPI00130734.1|SWISS-PROT:P07607|TREMBL:Q544L2;Q8C2H6;Q8C2R3;Q8K1U2;Q8VDV6;Q9D0H1|ENSEMBL:ENSMUSP00000026846|REFSEQ:NP_067263|VEGA:OTTMUSP00000029744 Tax_Id=10090 Gene_Symbol=Tyms Thymidylate synthase
NaN	NaN	NaN	NaN	0.631154	2.36496	0.573789	0.602337	0.717618	0.846167	NaN	0.686201	2.70937	4.41345	NaN	3.35008	1.34129	0.791828	0.543656	1.21935	0.582717	0.523889	0.657808	0.495148	46	0.00077693	3	11;9;3	11	11	AW551984	Putative uncharacterized protein	IPI00881765;IPI00460122	IPI00881765;IPI00460122;IPI00221591	Q8BGF0;Q8C1D4	>IPI:IPI00881765.1|TREMBL:Q8BGF0;Q8C1D4|ENSEMBL:ENSMUSP00000042582;ENSMUSP00000113212|REFSEQ:NP_848852|VEGA:OTTMUSP00000034209;OTTMUSP00000034211 Tax_Id=10090 Gene_Symbol=AW551984 Putative uncharacterized protein;>IPI:IPI00460122.1|TREMBL:D3Z5E6;Q6P8K4|ENS
2.29237	4.307	NaN	4.80607	2.88875	NaN	NaN	NaN	NaN	NaN	1.07565	1.23242	9.67866	7.05617	4.79111	6.30676	3.75672	1.51734	2.45876	3.39432	NaN	NaN	NaN	NaN	47	0.00148421	1	6	6	4	Ndufv3	NADH dehydrogenase (Ubiquinone) flavoprotein 3	IPI00128285	IPI00128285	Q3U422;Q3U4K3;Q91WP8	>IPI:IPI00128285.1|TREMBL:Q3U422;Q3U4K3;Q91WP8|ENSEMBL:ENSMUSP00000049000|REFSEQ:NP_084363 Tax_Id=10090 Gene_Symbol=Ndufv3 NADH dehydrogenase (Ubiquinone) flavoprotein 3
0.569509	0.721553	0.471609	0.742225	0.541331	0.600998	0.484896	0.808146	0.525514	0.754205	0.731743	0.69667	1.77393	0.987069	0.951837	1.20918	0.908843	0.642756	0.522657	0.858369	0.49128	0.51406	0.53234	0.624493	48	0.00103523	2	3;2	6	3	Arf4	20 kDa protein	IPI00876029;IPI00331663	IPI00876029;IPI00331663	E9Q798	>IPI:IPI00876029.1|ENSEMBL:ENSMUSP00000107937 Tax_Id=10090 Gene_Symbol=Arf4 20 kDa protein;>IPI:IPI00331663.20|SWISS-PROT:P61750|TREMBL:Q14BR4;Q9DD04|ENSEMBL:ENSMUSP00000022429|REFSEQ:NP_031505 Tax_Id=10090 Gene_Symbol=Arf4 Putative uncharacterized protein
5.86545	3.3094	3.57117	3.8238	4.19745	3.63914	4.21408	2.84156	3.57871	4.27223	3.58166	2.55206	1.55198	1.68124	1.89498	3.21068	2.98775	3.65444	5.45613	3.91083	6.08235	4.66527	6.3674	5.30955	49	0.000403404	3	10;10;9	10	10	Glod4	Isoform 1 of Glyoxalase domain-containing protein 4	IPI00110721;IPI00112630;IPI00831130	IPI00110721;IPI00112630;IPI00831130	Q9CPV4-1	>IPI:IPI00110721.5|SWISS-PROT:Q9CPV4-1|ENSEMBL:ENSMUSP00000017430|REFSEQ:NP_080305|VEGA:OTTMUSP00000006532 Tax_Id=10090 Gene_Symbol=Glod4 Isoform 1 of Glyoxalase domain-containing protein 4;>IPI:IPI00112630.2|SWISS-PROT:Q9CPV4-3|TREMBL:Q7TMP4|ENSEMBL:ENSMU
0.125332	0.160259	0.157791	0.148694	0.123419	0.0898957	0.120991	0.0750131	0.152423	0.149748	0.189383	0.19937	0.0578135	0.109451	0.0888652	0.0729607	0.160509	0.172429	0.130834	0.135433	0.0757633	0.105967	0.101749	0.0938087	50	5.76565e-05	1	40	40	30	Top2a	DNA topoisomerase 2-alpha	IPI00122223	IPI00122223	Q01320	>IPI:IPI00122223.1|SWISS-PROT:Q01320|TREMBL:Q3TTG4;Q3UUS6;Q52KI5;Q6PET9;Q8CCE5|ENSEMBL:ENSMUSP00000068896|REFSEQ:NP_035753|VEGA:OTTMUSP00000006845 Tax_Id=10090 Gene_Symbol=Top2a DNA topoisomerase 2-alpha
1.42814	1.8076	1.65145	1.9887	1.37735	1.43394	1.23119	1.46615	0.982608	1.06096	1.06904	1.01931	2.52634	1.9791	1.55195	1.56477	1.56101	1.41715	1.1962	1.39708	1.51893	0.835422	1.26429	1.3941	51	0.000951852	5	8;8;8;7;7	9	8	Dync1i2	Cytoplasmic dynein intermediate chain 2 isoform 2.1	IPI00776018;IPI00653072;IPI00131086;IPI00776053;IPI00775798	IPI00776018;IPI00653072;IPI00131086;IPI00776053;IPI00775798	A2BFF9;D6Q0F5;D6Q0F6	>IPI:IPI00776018.2|TREMBL:A2BFF9;D6Q0F5;D6Q0F6;D6Q0F7|ENSEMBL:ENSMUSP00000107768;ENSMUSP00000107772|VEGA:OTTMUSP00000018982;OTTMUSP00000018983 Tax_Id=10090 Gene_Symbol=Dync1i2 Cytoplasmic dynein intermediate chain 2 isoform 2.1;>IPI:IPI00653072.1|TREMBL:Q3
2.97566	3.3237	2.60906	2.59262	3.38742	3.26744	3.24717	2.97974	3.63121	3.05073	2.89603	3.28655	1.72927	2.3042	2.48293	2.66276	2.97974	2.84188	2.94412	2.75999	3.67175	3.38169	3.04581	4.07598	52	0.00079174	3	7;7;4	8	7	Vapb	Vesicle-associated membrane protein-associated protein B	IPI00135655;IPI00308187;IPI00654073	IPI00135655;IPI00308187;IPI00654073	Q9QY76	>IPI:IPI00135655.3|SWISS-PROT:Q9QY76 Tax_Id=10090 Gene_Symbol=Vapb Vesicle-associated membrane protein-associated protein B;>IPI:IPI00308187.1|TREMBL:Q3TU78;Q8BH80|ENSEMBL:ENSMUSP00000064699|REFSEQ:NP_062780|VEGA:OTTMUSP00000017608 Tax_Id=10090 Gene_Symbol
0.601395	0.94679	0.729767	0.780275	0.385461	0.465506	0.382307	0.385936	0.409584	0.47344	0.464662	0.495417	0.749457	0.71495	0.856311	0.651508	0.823113	0.471032	0.58682	0.693193	0.484496	0.575871	0.531124	0.397947	53	4.83808e-05	3	6;4;3	6	5	Mif	Macrophage migration inhibitory factor	IPI00230427;IPI00606310;IPI00122073	IPI00230427;IPI00606310;IPI00122073	P34884	>IPI:IPI00230427.5|SWISS-PROT:P34884|TREMBL:Q545F0|ENSEMBL:ENSMUSP00000041149|REFSEQ:NP_034928 Tax_Id=10090 Gene_Symbol=Mif Macrophage migration inhibitory factor;>IPI:IPI00606310.1|REFSEQ:XP_001481125;XP_001481126 Tax_Id=10090 Gene_Symbol=Gm10169 similar
5.45494	5.09347	5.80147	5.18699	6.36456	4.49681	5.01303	4.04334	4.21621	3.55467	4.09199	3.90503	4.17084	4.83699	7.01902	5.4227	4.57875	4.7221	4.79708	6.70466	6.44164	7.5643	8.01218	7.38225	54	0.000806215	14	47;47;47;45;17;7;3;3;3;3;2;2;1;1	47	47	Myo5a	Putative uncharacterized protein Myo5a	IPI00890268;IPI00928350;IPI00928007;IPI00118120	IPI00890268;IPI00928350;IPI00928007;IPI00118120;IPI00928395;IPI00776414;IPI00816932;IPI00410957;IPI00622850;IPI00875885;IPI00881560;IPI00928331;IPI00761673;IPI00881474	B8JK03;D3Z4J3	>IPI:IPI00890268.2|TREMBL:B8JK03;D3Z4J3|ENSEMBL:ENSMUSP00000109112;ENSMUSP00000117493|VEGA:OTTMUSP00000019176 Tax_Id=10090 Gene_Symbol=Myo5a Putative uncharacterized protein Myo5a;>IPI:IPI00928350.1|TREMBL:B8JK04|ENSEMBL:ENSMUSP00000109114;ENSMUSP000001148
0.580114	0.663482	0.799744	0.704027	0.644413	0.45583	0.415887	0.36523	0.433332	0.391666	0.35917	0.408831	0.826788	0.472835	0.568634	0.672631	0.796559	0.610165	0.659718	0.939585	0.404694	0.320492	0.409634	0.426986	55	0.000109261	7	3;3;3;2;2;2;2	5	3	H2afv	14 kDa protein	IPI00555055;IPI00331734;IPI00919098;IPI00651852;IPI00320149;IPI00654026;IPI00918450	IPI00555055;IPI00331734;IPI00919098;IPI00651852;IPI00320149;IPI00654026;IPI00918450	B2RVP5	>IPI:IPI00555055.3|ENSEMBL:ENSMUSP00000105359|VEGA:OTTMUSP00000005329 Tax_Id=10090 Gene_Symbol=H2afv 14 kDa protein;>IPI:IPI00331734.5|SWISS-PROT:P0C0S6|ENSEMBL:ENSMUSP00000036907|REFSEQ:NP_058030|VEGA:OTTMUSP00000025168 Tax_Id=10090 Gene_Symbol=H2afz Hist
0.33399	0.302316	0.41606	0.328882	0.276007	0.241185	0.232601	0.303702	0.234154	0.282686	0.203546	0.200509	0.486216	0.443892	0.263172	0.382775	0.348639	0.248509	0.297681	0.36224	0.190669	0.187765	0.244942	0.265682	56	0.00144368	4	31;20;14;2	31	19	Eef1a1	Elongation factor 1-alpha 1	IPI00307837;IPI00831365	IPI00307837;IPI00831365;IPI00831184;IPI00849577	P10126	>IPI:IPI00307837.6|SWISS-PROT:P10126|TREMBL:Q3TII3;Q3UA81;Q3UZQ3;Q4FZE5;Q58E64|ENSEMBL:ENSMUSP00000042457|REFSEQ:NP_034236|VEGA:OTTMUSP00000021291 Tax_Id=10090 Gene_Symbol=Eef1a1 Elongation factor 1-alpha 1;>IPI:IPI00831365.1|TREMBL:D3YZ68|ENSEMBL:ENSMUSP0
6.8465	6.22549	5.70255	5.28374	6.20617	6.84979	5.56204	5.86476	5.20481	3.37598	4.69285	4.78469	8.08734	7.72977	6.19195	6.41272	5.69476	6.91754	5.91226	6.00745	6.07607	6.50364	6.48971	6.45453	57	0.000930249	6	19;18;17;17;4;1	19	18	Rufy3	Isoform 1 of Protein RUFY3	IPI00622482;IPI00453965;IPI00762081;IPI00761269	IPI00622482;IPI00453965;IPI00762081;IPI00761269;IPI00457799;IPI00222147	Q9D394-1	>IPI:IPI00622482.2|SWISS-PROT:Q9D394-1|ENSEMBL:ENSMUSP00000031229|REFSEQ:NP_081806 Tax_Id=10090 Gene_Symbol=Rufy3 Isoform 1 of Protein RUFY3;>IPI:IPI00453965.2|SWISS-PROT:Q9D394-3|ENSEMBL:ENSMUSP00000084255 Tax_Id=10090 Gene_Symbol=Rufy3 Isoform 3 of Prote
6.37796	5.5605	6.54151	5.92031	8.73362	7.2448	8.45595	6.89655	8.37942	7.83576	8.2021	8.50847	4.05844	3.75432	5.51907	5.54539	6.07792	7.10026	7.56888	6.9185	7.85423	8.86761	9.15835	6.64055	58	2.21799e-05	1	26	26	26	Sucla2	Succinyl-CoA ligase [ADP-forming] subunit beta, mitochondrial	IPI00261627	IPI00261627	Q9Z2I9	>IPI:IPI00261627.1|SWISS-PROT:Q9Z2I9|TREMBL:Q05BC6;Q3U6C7;Q3UCC6;Q9CTE2|ENSEMBL:ENSMUSP00000022706|REFSEQ:NP_035636 Tax_Id=10090 Gene_Symbol=Sucla2 Succinyl-CoA ligase [ADP-forming] subunit beta, mitochondrial
0.898553	1.07432	NaN	NaN	NaN	NaN	NaN	NaN	NaN	NaN	NaN	NaN	2.18245	1.84734	1.66226	1.79733	1.56428	NaN	1.33431	1.28294	1.37448	1.37346	1.55113	1.2523	59	0.00048047	3	4;4;3	4	4	Coq9	Ubiquinone biosynthesis protein COQ9, mitochondrial	IPI00169862;IPI00885646;IPI00855012	IPI00169862;IPI00885646;IPI00855012	Q8K1Z0	>IPI:IPI00169862.1|SWISS-PROT:Q8K1Z0|ENSEMBL:ENSMUSP00000034234|REFSEQ:NP_080728|VEGA:OTTMUSP00000034087 Tax_Id=10090 Gene_Symbol=Coq9 Ubiquinone biosynthesis protein COQ9, mitochondrial;>IPI:IPI00885646.1|VEGA:OTTMUSP00000034088 Tax_Id=10090 Gene_Symbol=C
NaN	6.57073	6.0805	5.52944	NaN	NaN	NaN	NaN	9.45448	4.74113	5.48727	7.21241	8.73515	15.3001	15.6433	8.1281	1.68393	NaN	NaN	2.99635	8.39631	NaN	NaN	NaN	60	0.00135892	4	3;3;2;2	9	2	HPCA		IPI00230310;IPI00881347;IPI00648753	IPI00230310;IPI00881347;IPI00648753;IPI00649015	P84075	>IPI:IPI00230310.5|SWISS-PROT:P84075|ENSEMBL:ENSMUSP00000030572;ENSMUSP00000093486;ENSMUSP00000112143;ENSMUSP00000112145|REFSEQ:NP_001123891;NP_034601|VEGA:OTTMUSP00000010096;OTTMUSP00000010097;OTTMUSP00000010100;OTTMUSP00000042883;OTTMUSP00000042884;OTTMU
4.02139	3.57181	3.71195	4.22583	4.47748	4.82789	4.47207	4.3399	4.5683	4.78858	4.90918	4.74451	3.88818	3.81956	4.2434	4.13565	4.09299	4.29369	4.13702	4.32638	4.70588	4.8752	4.49701	4.58022	61	2.28959e-05	3	92;91;19	92	92	Cltc	Clathrin heavy chain 1	IPI00169916;IPI00648173	IPI00169916;IPI00648173;IPI00649850	Q68FD5	>IPI:IPI00169916.11|SWISS-PROT:Q68FD5|TREMBL:Q3TAN1;Q3TJ98;Q3TYQ2;Q3U0H2;Q3UPJ3;Q8K2I5|ENSEMBL:ENSMUSP00000099475|REFSEQ:NP_001003908|VEGA:OTTMUSP00000001191 Tax_Id=10090 Gene_Symbol=Cltc Clathrin heavy chain 1;>IPI:IPI00648173.1|TREMBL:Q5SXR6;Q80U89|ENSEM
1.06281	1.03771	1.29483	1.13977	1.01119	1.20175	1.05661	1.14153	0.832016	0.891663	0.68157	0.807233	0.818867	0.885191	0.981354	1.02942	0.975229	1.10527	0.921065	0.955749	0.996512	0.740905	0.878272	0.853971	62	0.000671895	4	8;7;7;4	8	8	Fabp5	Fatty acid-binding protein, epidermal	IPI00114162;IPI00876563;IPI00890241;IPI00378311	IPI00114162;IPI00876563;IPI00890241;IPI00378311	Q05816	>IPI:IPI00114162.3|SWISS-PROT:Q05816|TREMBL:Q497I3|ENSEMBL:ENSMUSP00000029046|REFSEQ:NP_034764|VEGA:OTTMUSP00000038483 Tax_Id=10090 Gene_Symbol=Fabp5 Fatty acid-binding protein, epidermal;>IPI:IPI00876563.1|TREMBL:Q3TLH6 Tax_Id=10090 Gene_Symbol=Fabp5 Puta
2.74529	2.06667	3.00264	3.01015	3.28106	3.48797	3.627	3.23792	4.52345	4.37025	4.19041	4.21017	3.40843	3.06363	4.20521	3.81141	4.09584	3.52411	3.3036	3.58346	3.74897	3.53607	3.72412	4.02998	63	0.000191128	2	8;1	8	8	Cox4i1	Cytochrome c oxidase subunit 4 isoform 1, mitochondrial	IPI00117978	IPI00117978;IPI00880392	P19783	>IPI:IPI00117978.1|SWISS-PROT:P19783|TREMBL:A2RSV8|ENSEMBL:ENSMUSP00000034276|REFSEQ:NP_034071 Tax_Id=10090 Gene_Symbol=Cox4i1 Cytochrome c oxidase subunit 4 isoform 1, mitochondrial
3.35672	4.54153	3.38811	3.37143	5.44395	5.29829	5.56731	5.90458	4.74226	5.30082	4.45434	4.26276	4.49681	5.62936	4.98654	4.78927	4.68472	6.28417	4.06289	4.60384	4.99251	5.95628	5.66765	5.81125	64	0.000734018	4	7;7;7;2	14	7	Sept6	Isoform II of Septin-6	IPI00462803;IPI00226602;IPI00473707	IPI00462803;IPI00226602;IPI00473707;IPI00831420	Q9R1T4-1	>IPI:IPI00462803.5|SWISS-PROT:Q9R1T4-1|ENSEMBL:ENSMUSP00000110894|REFSEQ:NP_001170795|VEGA:OTTMUSP00000018592 Tax_Id=10090 Gene_Symbol=Sept6 Isoform II of Septin-6;>IPI:IPI00226602.3|SWISS-PROT:Q9R1T4-3|TREMBL:Q3UUU4|ENSEMBL:ENSMUSP00000062014;ENSMUSP00000
4.52325	3.46213	3.91405	3.80026	5.36452	5.36826	5.40132	4.93242	5.00275	4.88974	4.69043	4.91183	3.40298	3.47862	4.03112	4.24881	5.12715	4.37848	4.59116	4.73866	4.31593	4.39676	4.8883	4.90244	65	4.75717e-05	5	39;28;21;6;2	39	7	Ncam1	Isoform 1 of Neural cell adhesion molecule 1	IPI00122971;IPI00830721;IPI00900395	IPI00122971;IPI00830721;IPI00900395;IPI00408904;IPI00874631	P13595-1	>IPI:IPI00122971.2|SWISS-PROT:P13595-1|ENSEMBL:ENSMUSP00000110127|REFSEQ:NP_001106675 Tax_Id=10090 Gene_Symbol=Ncam1 Isoform 1 of Neural cell adhesion molecule 1;>IPI:IPI00830721.2|SWISS-PROT:P13595-3|TREMBL:O08909;O88682;Q61946;Q6LBT4|ENSEMBL:ENSMUSP00000
0.841468	1.06094	1.15177	1.44829	1.06281	0.891981	0.99681	0.996711	0.829119	1.06604	0.819471	0.656944	1.75568	1.38251	1.31382	1.07456	1.29102	1.29331	1.09983	1.15511	0.808016	0.738934	0.818465	0.840266	66	0.000706022	2	4;4	4	4	Gm5578;Brox	similar to RIKEN cDNA 0610010K06 gene	IPI00408556;IPI00453679	IPI00408556;IPI00453679	Q8K2Q7;Q9DCT7;Q8BWM8	>IPI:IPI00408556.1|REFSEQ:XP_001472285;XP_485815 Tax_Id=10090 Gene_Symbol=Gm5578 similar to RIKEN cDNA 0610010K06 gene;>IPI:IPI00453679.2|SWISS-PROT:Q8K2Q7-1|ENSEMBL:ENSMUSP00000061345|REFSEQ:NP_082137 Tax_Id=10090 Gene_Symbol=0610010K06Rik Isoform 1 of BR
1.53311	1.55567	1.58459	1.65226	1.72554	1.80649	1.63268	1.7656	2.30266	2.11815	1.99056	2.20187	1.72992	1.7496	1.5918	1.82189	1.83682	1.76364	1.52344	1.54849	1.64644	1.55516	1.72861	1.80044	67	2.95239e-05	2	4;2	4	4	Atp5d	ATP synthase subunit delta, mitochondrial	IPI00453777;IPI00831453	IPI00453777;IPI00831453	Q9D3D9	>IPI:IPI00453777.2|SWISS-PROT:Q9D3D9|TREMBL:Q4FK74;Q9D0J2;Q9DCZ0|ENSEMBL:ENSMUSP00000003156;ENSMUSP00000101006|REFSEQ:NP_079589|VEGA:OTTMUSP00000020609 Tax_Id=10090 Gene_Symbol=Atp5d ATP synthase subunit delta, mitochondrial;>IPI:IPI00831453.1|TREMBL:D3Z7S
4.70146	4.15076	4.04285	4.76804	4.97636	5.26454	4.89332	4.74969	5.29241	5.82887	5.18807	5.77901	3.81476	3.97694	4.85272	4.63887	4.12678	4.40296	4.72188	4.49559	4.98604	5.35046	5.03702	5.00425	68	0.000457495	5	39;28;12;7;1	39	39	Atp6v1a	Isoform 1 of V-type proton ATPase catalytic subunit A	IPI00407692;IPI00844689	IPI00407692;IPI00844689;IPI00956776;IPI00858269;IPI00857006	P50516-1	>IPI:IPI00407692.3|SWISS-PROT:P50516-1|ENSEMBL:ENSMUSP00000066886;ENSMUSP00000110314|REFSEQ:NP_031534|VEGA:OTTMUSP00000027535;OTTMUSP00000027536 Tax_Id=10090 Gene_Symbol=Atp6v1a Isoform 1 of V-type proton ATPase catalytic subunit A;>IPI:IPI00844689.1|SWISS
4.5583	3.43206	2.79885	4.08463	5.20048	4.53865	5.47855	4.30775	4.71076	5.16262	4.70367	4.80077	3.14011	3.31763	4.08981	4.17136	5.18915	4.48612	3.33433	4.63177	6.1908	6.0518	6.12183	5.65835	69	0.000633508	8	6;6;6;5;1;1;1;1	6	2	Hras1	Hras1 protein (Fragment)	IPI00403929;IPI00121071;IPI00911164;IPI00605942	IPI00403929;IPI00121071;IPI00911164;IPI00605942;IPI00856440;IPI00857121;IPI00895033;IPI00830951	Q6P716	>IPI:IPI00403929.4|TREMBL:Q6P716|ENSEMBL:ENSMUSP00000091515 Tax_Id=10090 Gene_Symbol=Hras1 Hras1 protein (Fragment);>IPI:IPI00121071.5|SWISS-PROT:Q61411 Tax_Id=10090 Gene_Symbol=Hras1 GTPase HRas;>IPI:IPI00911164.1|TREMBL:Q76LV5;Q9R0B8|ENSEMBL:ENSMUSP00000
2.8473	3.20595	3.01305	3.38719	3.89605	4.2704	4.02382	4.45216	4.22797	4.25786	3.75784	3.87747	3.42313	3.05745	3.47186	3.70357	3.48202	4.01622	3.06419	3.54988	3.19479	3.64325	3.67309	3.19305	70	0.000494724	5	24;20;12;4;2	27	19	Ywhaz	41701 protein zeta/delta	IPI00116498;IPI00853851;IPI00473203	IPI00116498;IPI00853851;IPI00473203;IPI00776377;IPI00775847	P63101	>IPI:IPI00116498.1|SWISS-PROT:P63101|TREMBL:Q3UA58|ENSEMBL:ENSMUSP00000022894;ENSMUSP00000105990;ENSMUSP00000105991|REFSEQ:NP_035870|VEGA:OTTMUSP00000018478;OTTMUSP00000018479;OTTMUSP00000018480 Tax_Id=10090 Gene_Symbol=Ywhaz 14-3-3 protein zeta/delta;>IPI
0.719425	0.859402	0.866927	0.900901	0.742942	0.754148	0.711896	0.783085	0.607829	0.700427	0.596801	0.657203	0.785855	0.771486	0.763068	0.636173	0.795545	0.85859	0.703433	0.761673	0.689941	0.558597	0.642096	0.650068	71	0.000945674	2	18;18	18	18	Lap3	Isoform 1 of Cytosol aminopeptidase	IPI00331436;IPI00828469	IPI00331436;IPI00828469	Q9CPY7-1	>IPI:IPI00331436.4|SWISS-PROT:Q9CPY7-1|ENSEMBL:ENSMUSP00000040222|REFSEQ:NP_077754|VEGA:OTTMUSP00000034813 Tax_Id=10090 Gene_Symbol=Lap3 Isoform 1 of Cytosol aminopeptidase;>IPI:IPI00828469.1|SWISS-PROT:Q9CPY7-2 Tax_Id=10090 Gene_Symbol=Lap3 Isoform 2 of C
3.15996	3.02508	2.77446	2.79486	3.16306	3.30513	3.01169	3.05222	3.32823	3.31543	3.35954	3.24633	2.64452	2.258	2.73733	2.7407	3.17884	3.35255	3.36044	3.18006	2.91477	2.76335	3.29186	3.01123	72	0.000150613	8	40;40;28;28;27;19;17;1	40	16	Aldoa	fructose-bisphosphate aldolase A isoform 1	IPI00856379;IPI00221402;IPI00856272;IPI00649880;IPI00858310	IPI00856379;IPI00221402;IPI00856272;IPI00649880;IPI00858310;IPI00856247;IPI00856415;IPI00127206	A6ZI44;Q6NY00	>IPI:IPI00856379.1|TREMBL:A6ZI44;Q6NY00|ENSEMBL:ENSMUSP00000084846|REFSEQ:NP_001170778|VEGA:OTTMUSP00000030465 Tax_Id=10090 Gene_Symbol=Aldoa fructose-bisphosphate aldolase A isoform 1;>IPI:IPI00221402.7|SWISS-PROT:P05064|TREMBL:Q5FWB7|ENSEMBL:ENSMUSP00000
0.426657	0.405482	0.388621	0.408447	0.338455	0.312412	0.271164	0.31293	0.374237	0.384438	0.324328	0.375841	0.305157	0.279798	0.347657	0.293247	0.364604	0.427515	0.387898	0.417484	0.285665	0.207241	0.296665	0.342267	73	0.000423405	3	15;6;4	15	15	Phgdh	D-3-phosphoglycerate dehydrogenase	IPI00225961	IPI00225961;IPI00885925;IPI00459364	Q61753	>IPI:IPI00225961.5|SWISS-PROT:Q61753|ENSEMBL:ENSMUSP00000064755|REFSEQ:NP_058662|VEGA:OTTMUSP00000032394 Tax_Id=10090 Gene_Symbol=Phgdh D-3-phosphoglycerate dehydrogenase
1.52177	1.68481	1.53865	1.79795	2.22415	1.94806	2.23289	2.40004	2.1768	2.3439	2.24175	2.23739	1.57896	2.16967	1.98338	2.11685	2.10993	2.21577	1.83763	2.11555	2.21215	1.98208	2.04901	2.00489	74	0.000795548	2	12;12	12	12	Vdac3	Voltage-dependent anion channel 3	IPI00122548;IPI00876341	IPI00122548;IPI00876341	Q3TTN3;Q5EBQ0	>IPI:IPI00122548.3|TREMBL:Q3TTN3;Q5EBQ0|ENSEMBL:ENSMUSP00000106343 Tax_Id=10090 Gene_Symbol=Vdac3 Voltage-dependent anion channel 3;>IPI:IPI00876341.1|SWISS-PROT:Q60931|TREMBL:Q3TX38;Q3UFA8|ENSEMBL:ENSMUSP00000009036|REFSEQ:NP_035826 Tax_Id=10090 Gene_Symb
0.976086	0.9996	1.09994	1.172	0.945895	0.770535	0.91954	1.09899	0.809258	0.919371	0.811557	0.860141	0.893096	1.11842	1.08615	1.06539	1.15161	0.960246	1.01461	1.08379	0.715205	0.745657	0.715973	0.816793	75	0.000189842	12	15;14;11;11;2;2;2;2;1;1;1;1	15	12	Stmn1; Lag; Lap18; Pr22;Gm11223	similar to Pr22 isoform 1	IPI00475138;IPI00551236;IPI00649157;IPI00648723	IPI00475138;IPI00551236;IPI00649157;IPI00648723;IPI00880471;IPI00881962;IPI00130663;IPI00882114;REV__IPI00226436;REV__IPI00387320;REV__IPI00223219;REV__IPI00750980	P54227;Q91XT3;Q8C2H3;Q545B6	>IPI:IPI00475138.1|REFSEQ:XP_001474124;XP_001474138;XP_001477471;XP_001477487 Tax_Id=10090 Gene_Symbol=Gm11223 similar to Pr22 isoform 1;>IPI:IPI00551236.3|SWISS-PROT:P54227|TREMBL:Q545B6;Q8C2H3;Q91XT3;Q9CXQ8;Q9CYU5;Q9DCP3|ENSEMBL:ENSMUSP00000030636;ENSMUS
1.16268	1.41651	1.43817	1.44055	1.13863	1.09024	1.01815	1.21325	1.27509	1.17689	1.00377	0.988924	1.30314	1.33991	1.36084	1.3708	1.7831	1.30666	1.39501	1.5082	1.25102	1.03908	1.19094	1.08897	76	0.00108903	6	10;10;10;9;5;5	10	10	Pnp	Purine nucleoside phosphorylase	IPI00315452;IPI00607023;IPI00751493;IPI00850054;IPI00468039;IPI00875288	IPI00315452;IPI00607023;IPI00751493;IPI00850054;IPI00468039;IPI00875288	P23492	>IPI:IPI00315452.5|SWISS-PROT:P23492 Tax_Id=10090 Gene_Symbol=Pnp Purine nucleoside phosphorylase;>IPI:IPI00607023.1|TREMBL:Q543K9|ENSEMBL:ENSMUSP00000043926|REFSEQ:NP_038660|VEGA:OTTMUSP00000043119 Tax_Id=10090 Gene_Symbol=Pnp purine nucleoside phosphoryl
0.0739535	0.0632231	0.0633593	0.092816	0.0353669	0.0374546	0.0478538	0.0335492	0.0466462	0.0620386	0.0576734	0.0694251	0.0391068	0.0390594	0.0581767	0.0472121	0.062901	0.0447968	0.0637227	0.0567698	0.0396385	0.0530223	0.0363994	0.0448732	77	0.000525521	3	31;31;30	35	1	Prph	Isoform 3u of Peripherin	IPI00230444;IPI00129527;IPI00944023	IPI00230444;IPI00129527;IPI00944023	P15331-2	>IPI:IPI00230444.1|SWISS-PROT:P15331-2|ENSEMBL:ENSMUSP00000049303|REFSEQ:NP_038667 Tax_Id=10090 Gene_Symbol=Prph Isoform 3u of Peripherin;>IPI:IPI00129527.3|SWISS-PROT:P15331-1|ENSEMBL:ENSMUSP00000024249|REFSEQ:NP_001157061 Tax_Id=10090 Gene_Symbol=Prph Is
4.07963	3.80662	4.21408	4.85909	4.20504	3.52497	3.91481	2.77585	2.97663	3.42724	3.00237	3.09004	5.2651	4.53206	4.48773	5.04821	4.51957	4.90268	3.9302	5.80855	4.27881	3.07607	3.49858	3.83391	78	0.000728779	2	22;22	26	0	Epb41l2; Epb4. 1l2	Band 4.1-like protein 2	IPI00309481;IPI00330289	IPI00309481;IPI00330289	O70318	>IPI:IPI00309481.1|SWISS-PROT:O70318 Tax_Id=10090 Gene_Symbol=Epb4.1l2 Band 4.1-like protein 2;>IPI:IPI00330289.3|TREMBL:B6ZHD0;Q3UNQ6;Q80UE3|ENSEMBL:ENSMUSP00000055122|REFSEQ:NP_038539 Tax_Id=10090 Gene_Symbol=Epb4.1l2 band 4.1-like protein 2
2.52302	2.55454	2.46707	2.94187	3.00661	3.09521	3.26179	3.23321	3.48323	3.32834	3.2257	3.15726	2.54602	2.30734	2.66418	2.7533	3.37291	3.08957	2.53434	3.14021	2.80749	3.04377	3.00779	3.23813	79	0.000675323	1	44	44	44	Aco2	Aconitate hydratase, mitochondrial	IPI00116074	IPI00116074	Q99KI0	>IPI:IPI00116074.1|SWISS-PROT:Q99KI0|ENSEMBL:ENSMUSP00000023116|REFSEQ:NP_542364|VEGA:OTTMUSP00000017637 Tax_Id=10090 Gene_Symbol=Aco2 Aconitate hydratase, mitochondrial
5.71755	5.40278	4.54587	5.02109	5.94813	6.11883	5.43863	4.76531	5.93718	6.35364	6.05217	6.44787	5.61136	5.52547	7.06315	6.34196	4.99127	5.71298	5.85686	5.74283	6.68852	8.02053	8.01346	6.82407	80	0.000788788	1	34	34	31	Slc25a12	Calcium-binding mitochondrial carrier protein Aralar1	IPI00308162	IPI00308162	Q8BH59	>IPI:IPI00308162.3|SWISS-PROT:Q8BH59|ENSEMBL:ENSMUSP00000122103|REFSEQ:NP_766024|VEGA:OTTMUSP00000014191 Tax_Id=10090 Gene_Symbol=Slc25a12 Calcium-binding mitochondrial carrier protein Aralar1
1.68033	1.70619	1.90215	1.82608	1.99275	2.05829	2.05457	2.02721	2.27692	2.09538	2.10784	2.0141	1.76382	1.59413	1.77481	1.75202	2.18703	2.23329	1.95929	1.90996	2.03128	1.98283	1.9857	1.96263	81	3.61218e-05	1	26	26	26	Mdh2	Malate dehydrogenase, mitochondrial	IPI00323592	IPI00323592	P08249	>IPI:IPI00323592.2|SWISS-PROT:P08249|ENSEMBL:ENSMUSP00000019323|REFSEQ:NP_032643|VEGA:OTTMUSP00000026139 Tax_Id=10090 Gene_Symbol=Mdh2 Malate dehydrogenase, mitochondrial
4.2746	3.43418	3.78616	3.46584	4.13907	3.77615	3.89894	4.03568	4.19745	4.32844	3.93577	4.09249	3.1739	2.93763	3.29598	3.66233	4.2107	3.84349	4.51692	4.0222	3.99824	3.52262	3.76251	3.71692	82	0.00116952	1	30	30	22	Pgk1	Phosphoglycerate kinase 1	IPI00555069	IPI00555069	P09411	>IPI:IPI00555069.3|SWISS-PROT:P09411|TREMBL:B0LAA9|ENSEMBL:ENSMUSP00000080302|REFSEQ:NP_032854|VEGA:OTTMUSP00000019855 Tax_Id=10090 Gene_Symbol=Pgk1 Phosphoglycerate kinase 1
2.79775	2.65435	3.29099	2.83118	3.94353	3.87792	4.03959	4.08965	3.88078	3.83759	3.38753	3.69754	2.89948	3.33445	3.48639	4.06339	3.83936	4.07631	3.46705	3.81898	3.40171	3.27118	3.59234	3.56087	83	0.000401465	1	19	25	16	Ywhag	41701 protein gamma	IPI00230707	IPI00230707	P61982	>IPI:IPI00230707.6|SWISS-PROT:P61982|TREMBL:A8IP69|ENSEMBL:ENSMUSP00000051223|REFSEQ:NP_061359|VEGA:OTTMUSP00000017492 Tax_Id=10090 Gene_Symbol=Ywhag 14-3-3 protein gamma
3.55859	3.62937	3.84822	5.00576	4.54628	3.6365	4.02852	3.0304	6.79856	5.92487	5.56607	5.40219	5.4606	4.84332	6.32071	4.50471	4.65138	5.50661	3.69399	4.35123	6.57678	5.14695	6.65203	5.87993	84	0.000583616	1	18	18	13	Map2k1	Dual specificity mitogen-activated protein kinase kinase 1	IPI00466610	IPI00466610	P31938	>IPI:IPI00466610.5|SWISS-PROT:P31938|TREMBL:Q3TMJ8;Q3TMW4;Q3U3F4;Q3UK05;Q9JJE1|ENSEMBL:ENSMUSP00000005066|REFSEQ:NP_032953|VEGA:OTTMUSP00000018355 Tax_Id=10090 Gene_Symbol=Map2k1 Dual specificity mitogen-activated protein kinase kinase 1
2.52105	2.78823	2.17751	2.37214	3.31587	3.12568	3.38558	2.90605	3.33023	3.18167	2.83616	2.93075	2.2519	2.48521	2.24422	2.79236	2.95701	3.20739	2.44248	2.78691	3.30022	3.7955	3.44768	3.40843	85	8.71062e-05	1	12	12	8	Rab2a	Ras-related protein Rab-2A	IPI00137227	IPI00137227	P53994	>IPI:IPI00137227.1|SWISS-PROT:P53994|TREMBL:Q0PD65;Q6PDZ3;Q8BXY4|ENSEMBL:ENSMUSP00000057664|REFSEQ:NP_067493|VEGA:OTTMUSP00000004796 Tax_Id=10090 Gene_Symbol=Rab2a Ras-related protein Rab-2A
6.46998	5.31096	4.89692	4.71165	7.06664	7.35402	7.37354	6.46998	6.71908	8.62441	7.73934	7.56487	5.72443	5.08466	5.6164	6.3484	5.10126	7.227	6.96816	6.8264	6.35042	7.07814	6.83107	7.34862	86	0.00145561	1	16	16	8	Gnb1	Guanine nucleotide-binding protein G(I)/G(S)/G(T	IPI00120716	IPI00120716	P62874	>IPI:IPI00120716.3|SWISS-PROT:P62874|TREMBL:Q3TQ70;Q3U1B1;Q61621|ENSEMBL:ENSMUSP00000030940;ENSMUSP00000101241|REFSEQ:NP_001153488;NP_001153489;NP_032168|VEGA:OTTMUSP00000011446 Tax_Id=10090 Gene_Symbol=Gnb1 Guanine nucleotide-binding protein G(I)/G(S)/G(T
1.69231	1.78747	2.3566	2.1692	1.8842	1.83861	1.95883	1.74572	1.69999	1.92138	1.41882	1.40064	2.90276	2.41365	2.19708	2.24729	1.5539	1.67012	1.53085	1.40762	1.65519	1.94307	2.19452	1.84047	87	0.000531202	1	7	7	7	Trove2	60 kDa SS-A/Ro ribonucleoprotein	IPI00116360	IPI00116360	O08848	>IPI:IPI00116360.3|SWISS-PROT:O08848|TREMBL:Q3TJ75;Q80W12;Q8R562|ENSEMBL:ENSMUSP00000018343|REFSEQ:NP_038863|VEGA:OTTMUSP00000024494 Tax_Id=10090 Gene_Symbol=Trove2 60 kDa SS-A/Ro ribonucleoprotein
2.76396	3.16726	5.2751	3.25066	2.0787	2.29864	1.9718	1.48188	2.22	2.93884	1.63343	1.38389	3.2456	3.94027	4.21888	4.51324	5.2626	1.78769	2.47115	5.22548	1.90538	3.08433	1.15141	3.32923	88	0.0323309	4	9;9;7;2	9	9	Slc32a1	Isoform 1 of Vesicular inhibitory amino acid transporter	IPI00132720;IPI00221831;IPI00754385	IPI00132720;IPI00221831;IPI00754385;IPI00652817	O35633-1	>IPI:IPI00132720.2|SWISS-PROT:O35633-1|TREMBL:Q49S98|ENSEMBL:ENSMUSP00000036299|REFSEQ:NP_033534|VEGA:OTTMUSP00000016986 Tax_Id=10090 Gene_Symbol=Slc32a1 Isoform 1 of Vesicular inhibitory amino acid transporter;>IPI:IPI00221831.1|SWISS-PROT:O35633-2|ENSEMB
6.90131	2.58638	3.27182	3.6324	6.66222	3.53932	4.54484	4.38731	3.69617	3.06701	4.13223	3.12783	1.41501	2.90149	2.79885	3.59273	6.90607	4.07614	10.6162	5.35647	5.14139	7.55858	9.15416	4.58926	89	0.00825038	2	9;7	10	9	Gnaz	Guanine nucleotide-binding protein G(z) subunit alpha	IPI00230193;IPI00850311	IPI00230193;IPI00850311	O70443	>IPI:IPI00230193.7|SWISS-PROT:O70443|TREMBL:Q3UYF9;Q542R8|ENSEMBL:ENSMUSP00000036087|REFSEQ:NP_034441|VEGA:OTTMUSP00000044104;OTTMUSP00000044105 Tax_Id=10090 Gene_Symbol=Gnaz Guanine nucleotide-binding protein G(z) subunit alpha;>IPI:IPI00850311.1|REFSEQ:X
5.74977	1.54295	4.02269	2.82669	6.75858	5.08802	5.63634	10.2279	5.34817	3.89393	3.04841	2.85274	4.78606	9.32227	10.6186	10.2987	4.21799	4.17432	10.5455	10.8258	7.62834	8.99685	2.54421	6.10463	90	0.0493719	4	8;8;2;2	8	8	Mecp2	Isoform B of Methyl-CpG-binding protein 2	IPI00775806;IPI00131063	IPI00775806;IPI00131063;IPI00928332;IPI00928380	Q9Z2D6-2	>IPI:IPI00775806.2|SWISS-PROT:Q9Z2D6-2|ENSEMBL:ENSMUSP00000033770|REFSEQ:NP_001075448|VEGA:OTTMUSP00000019680 Tax_Id=10090 Gene_Symbol=Mecp2 Isoform B of Methyl-CpG-binding protein 2;>IPI:IPI00131063.4|SWISS-PROT:Q9Z2D6-1|ENSEMBL:ENSMUSP00000098314|REFSEQ:
4.10038	3.9692	4.00689	5.37895	4.38308	5.83805	5.90667	3.56176	5.10803	2.69106	3.60607	1.02517	4.17815	0.878735	1.40442	4.13942	4.57624	4.71965	3.47838	5.44159	5.39724	5.68602	6.21929	6.3484	91	0.0412299	2	8;8	9	8	Mpp2	Isoform 2 of MAGUK p55 subfamily member 2	IPI00756238;IPI00125147	IPI00756238;IPI00125147	Q9WV34-2	>IPI:IPI00756238.2|SWISS-PROT:Q9WV34-2|ENSEMBL:ENSMUSP00000097967|VEGA:OTTMUSP00000017504 Tax_Id=10090 Gene_Symbol=Mpp2 Isoform 2 of MAGUK p55 subfamily member 2;>IPI:IPI00125147.4|SWISS-PROT:Q9WV34-1|TREMBL:B1AQF9|ENSEMBL:ENSMUSP00000017458|REFSEQ:NP_0579
0.130861	NaN	NaN	0.147796	0.0723537	0.0970026	0.0465701	0.0591471	0.167182	0.768699	NaN	0.846525	0.19789	0.0466157	0.140201	0.0558347	0.161345	0.0295299	0.140184	0.143275	0.0375841	0.127815	0.0373246	0.0392526	92	0.0094816	4	8;7;6;6	8	8	Pcna	Proliferating cell nuclear antigen	IPI00113870;IPI00848977;IPI00473170;IPI00850755	IPI00113870;IPI00848977;IPI00473170;IPI00850755	P17918	>IPI:IPI00113870.1|SWISS-PROT:P17918|TREMBL:Q542J9;Q91ZH2|ENSEMBL:ENSMUSP00000028817|REFSEQ:NP_035175|VEGA:OTTMUSP00000016567 Tax_Id=10090 Gene_Symbol=Pcna Proliferating cell nuclear antigen;>IPI:IPI00848977.1|REFSEQ:XP_001478024 Tax_Id=10090 Gene_Symbol=L
0.213657	0.355353	0.364884	0.271444	0.178603	0.225734	0.224411	0.295648	0.217604	NaN	0.205137	0.218379	0.380836	0.199768	0.289779	0.245357	0.312989	0.180229	0.112736	0.209065	0.112289	0.085778	0.198626	0.165341	93	0.0211746	2	8;6	10	8	Aldh1l2	Probable 10-formyltetrahydrofolate dehydrogenase ALDH1L2	IPI00169472;IPI00858223	IPI00169472;IPI00858223	Q8K009	>IPI:IPI00169472.3|SWISS-PROT:Q8K009|ENSEMBL:ENSMUSP00000020497|REFSEQ:NP_705771|VEGA:OTTMUSP00000029894 Tax_Id=10090 Gene_Symbol=Aldh1l2 Probable 10-formyltetrahydrofolate dehydrogenase ALDH1L2;>IPI:IPI00858223.1|TREMBL:D3Z6B9|ENSEMBL:ENSMUSP00000117076|V
7.54034	4.67443	3.97078	4.81928	5.24164	4.61148	4.78354	3.53307	4.63177	3.9412	5.69217	5.50449	2.98766	3.42395	5.69023	4.64166	6.46245	4.97117	4.95982	9.07112	6.03755	8.4488	7.63942	10.6716	94	0.0118232	3	17;7;4	17	8	Glul	Glutamine synthetase	IPI00626790	IPI00626790;IPI00831244;IPI00830929	P15105	>IPI:IPI00626790.3|SWISS-PROT:P15105|ENSEMBL:ENSMUSP00000083375|REFSEQ:NP_032157|VEGA:OTTMUSP00000017702 Tax_Id=10090 Gene_Symbol=Glul Glutamine synthetase
7.54774	5.87717	3.92681	3.58564	8.1626	7.21344	7.00378	5.45792	5.58597	5.59222	4.99975	8.08734	3.01859	5.20021	7.73634	6.58068	4.19551	5.33049	7.48671	4.52304	9.28505	11.3723	10.7582	8.65351	95	0.0195059	2	73;73	74	73	Map1a; Mtap1; Mtap1a	Microtubule-associated protein 1 A	IPI00676243;IPI00408909	IPI00676243;IPI00408909	Q9QYR6-2	>IPI:IPI00676243.2|SWISS-PROT:Q9QYR6-2|TREMBL:A2ARP8|ENSEMBL:ENSMUSP00000092223|REFSEQ:NP_115769|VEGA:OTTMUSP00000016203 Tax_Id=10090 Gene_Symbol=Mtap1a Microtubule-associated protein 1 A;>IPI:IPI00408909.4|SWISS-PROT:Q9QYR6-1|ENSEMBL:ENSMUSP00000106269|RE
0.120309	0.315666	0.581159	0.308823	0.304971	0.345375	0.263206	0.400048	0.491014	0.531463	0.927386	0.783269	0.524852	0.389272	0.338558	0.351099	0.415714	0.432657	0.296586	0.31028	0.291562	0.2189	0.23951	0.313716	96	0.01386	4	7;7;7;1	7	7	Rpl28;Rpl28-ps1		IPI00222547;IPI00473429;IPI00620288	IPI00222547;IPI00473429;IPI00620288;IPI00885498	P41105	>IPI:IPI00222547.6|SWISS-PROT:P41105|TREMBL:Q5M9J8;Q5M9N5|ENSEMBL:ENSMUSP00000032597;ENSMUSP00000104217|REFSEQ:NP_033107;XP_001478143;XP_001479100|VEGA:OTTMUSP00000026507;OTTMUSP00000026508 Tax_Id=10090 Gene_Symbol=Rpl28;Rpl28-ps1 60S ribosomal protein L28
3.86608	5.48847	4.65051	7.81617	4.20751	3.92742	4.09668	4.31388	3.49736	4.22887	3.62766	4.92005	6.1736	0.91083	2.97805	0.960338	5.0857	4.92271	13.2134	5.42535	5.61577	4.95001	5.27176	3.97931	97	0.0303247	3	7;7;4	7	7	Blvrb	27 kDa protein	IPI00857740;IPI00113996;IPI00857340	IPI00857740;IPI00113996;IPI00857340	E9PZC3;Q3TP34	>IPI:IPI00857740.1|ENSEMBL:ENSMUSP00000103995|VEGA:OTTMUSP00000027052 Tax_Id=10090 Gene_Symbol=Blvrb 27 kDa protein;>IPI:IPI00113996.7|SWISS-PROT:Q923D2|TREMBL:Q3U6G1|ENSEMBL:ENSMUSP00000043092|REFSEQ:NP_659172|VEGA:OTTMUSP00000027051 Tax_Id=10090 Gene_Sym
NaN	0.601721	4.12303	4.31667	5.20996	12.3663	3.00915	6.94879	2.57414	7.18752	NaN	NaN	2.77246	0.664849	2.07598	1.12104	0.95338	4.62321	4.93705	4.44701	9.79048	15.0509	11.4427	11.9242	98	0.0106883	2	7;6	7	7	Tprg1l; Fam79a; Niver; Tprgl	Tumor protein p63-regulated gene 1-like protein	IPI00120085;IPI00649114	IPI00120085;IPI00649114	Q9DBS2	>IPI:IPI00120085.1|SWISS-PROT:Q9DBS2|ENSEMBL:ENSMUSP00000030896|REFSEQ:NP_080664|VEGA:OTTMUSP00000011267 Tax_Id=10090 Gene_Symbol=Tprgl Tumor protein p63-regulated gene 1-like protein;>IPI:IPI00649114.1|TREMBL:B1AX95|ENSEMBL:ENSMUSP00000101264|VEGA:OTTMUSP
6.80087	2.9634	2.66532	NaN	6.73038	3.58783	2.43944	2.69527	2.05347	1.48082	1.93244	5.96659	0.603318	2.42236	2.44972	2.23969	4.97587	4.21816	NaN	NaN	6.96427	NaN	6.41478	8.48824	99	0.0379877	2	7;6	7	7	Tst	Thiosulfate sulfurtransferase	IPI00223216;IPI00762128	IPI00223216;IPI00762128	P52196	>IPI:IPI00223216.5|SWISS-PROT:P52196|TREMBL:Q545S0|ENSEMBL:ENSMUSP00000055743|REFSEQ:NP_033463 Tax_Id=10090 Gene_Symbol=Tst Thiosulfate sulfurtransferase;>IPI:IPI00762128.2|TREMBL:D3YYT7|ENSEMBL:ENSMUSP00000098046 Tax_Id=10090 Gene_Symbol=Tst Putative unch
0.189782	0.0955566	0.212292	0.499226	0.116569	0.335852	0.127091	NaN	0.31053	0.287704	0.464684	0.212508	NaN	0.221587	0.127939	0.114003	0.227889	0.0922935	0.182896	0.258866	0.081626	0.074228	0.0766401	0.118261	100	0.0319345	2	8;4	9	7	Cdk1	Cell division protein kinase 1	IPI00114491;IPI00894639	IPI00114491;IPI00894639	P11440	>IPI:IPI00114491.1|SWISS-PROT:P11440|TREMBL:Q8R4A4;Q99JW7|ENSEMBL:ENSMUSP00000020099;ENSMUSP00000113184|REFSEQ:NP_031685|VEGA:OTTMUSP00000040934;OTTMUSP00000040935 Tax_Id=10090 Gene_Symbol=Cdk1 Cell division protein kinase 1;>IPI:IPI00894639.1|TREMBL:D3Z2T
14.1127	5.86717	4.8631	7.55002	2.09652	3.26904	3.4709	2.16338	12.7514	5.88547	6.4834	6.60153	9.31532	8.1367	19.6244	4.77737	5.83328	5.66476	3.48943	16.3744	8.54044	19.9005	8.19807	7.24796	101	0.014425	3	7;1;1	7	7	Slc1a3	Excitatory amino acid transporter 1	IPI00114279	IPI00114279;IPI00131666;IPI00918895	P56564	>IPI:IPI00114279.1|SWISS-PROT:P56564|TREMBL:Q543U3;Q8C3T7;Q8C7W8;Q99NG1|ENSEMBL:ENSMUSP00000005493|REFSEQ:NP_683740|VEGA:OTTMUSP00000043391 Tax_Id=10090 Gene_Symbol=Slc1a3 Excitatory amino acid transporter 1
3.69263	3.63385	3.97093	7.68344	NaN	NaN	6.61945	7.83269	NaN	3.59208	NaN	2.55454	9.95421	7.89578	6.72857	8.87784	5.30279	6.2282	3.58025	6.64717	7.45545	4.85037	NaN	NaN	102	0.0128601	5	8;8;8;7;7	8	6	Trio	Isoform 4 of Triple functional domain protein	IPI00943997;IPI00604947;IPI00944152;IPI00828306;IPI00605176	IPI00943997;IPI00604947;IPI00944152;IPI00828306;IPI00605176	Q0KL02-4	>IPI:IPI00943997.1|SWISS-PROT:Q0KL02-4|REFSEQ:NP_001074771;XP_001475018 Tax_Id=10090 Gene_Symbol=Trio Isoform 4 of Triple functional domain protein;>IPI:IPI00604947.6|SWISS-PROT:Q0KL02-1|ENSEMBL:ENSMUSP00000087714 Tax_Id=10090 Gene_Symbol=Trio Isoform 1 of
3.42548	1.2722	1.80486	1.94518	0.770179	0.675767	1.05239	0.531237	2.37096	1.90364	1.90183	2.74251	1.42873	2.23274	3.28202	6.19157	2.06203	1.42102	1.66553	3.78773	1.47925	1.4646	1.96905	4.52407	103	0.00667759	4	6;6;5;1	6	6	Cd200	OX-2 membrane glycoprotein	IPI00119756;IPI00775807;IPI00808115	IPI00119756;IPI00775807;IPI00808115;IPI00853751	O54901	>IPI:IPI00119756.1|SWISS-PROT:O54901 Tax_Id=10090 Gene_Symbol=Cd200 OX-2 membrane glycoprotein;>IPI:IPI00775807.1|TREMBL:Q80VX2|ENSEMBL:ENSMUSP00000023341|REFSEQ:NP_034948 Tax_Id=10090 Gene_Symbol=Cd200 OX-2 membrane glycoprotein precursor;>IPI:IPI00808115
1.26049	NaN	4.07747	0.681338	3.84556	4.59855	7.72559	2.4115	1.57366	6.37633	3.49504	7.07214	2.44738	3.88682	4.06752	2.27443	2.13051	2.79205	6.94348	0.752785	10.3351	9.97606	5.90912	7.46213	104	0.0418692	2	6;6	6	6	Fbxo2	F-box only protein 2	IPI00153176;IPI00894941	IPI00153176;IPI00894941	Q80UW2	>IPI:IPI00153176.2|SWISS-PROT:Q80UW2|TREMBL:Q3USR5|ENSEMBL:ENSMUSP00000037377|REFSEQ:NP_789818|VEGA:OTTMUSP00000011756 Tax_Id=10090 Gene_Symbol=Fbxo2 F-box only protein 2;>IPI:IPI00894941.1|TREMBL:B2KFV9|VEGA:OTTMUSP00000042789 Tax_Id=10090 Gene_Symbol=Fbx
3.21667	2.90537	4.08547	4.4613	NaN	7.69942	NaN	NaN	3.99616	7.77847	6.93722	5.43154	1.5085	1.80766	2.9509	2.61056	5.4339	4.23603	2.14929	8.46525	5.26094	3.55189	8.29876	NaN	105	0.0172512	6	6;5;5;5;4;2	6	6	Ttyh1	Isoform 1 of Protein tweety homolog 1	IPI00113244;IPI00623995;IPI00420152;IPI00551270;IPI00875552	IPI00113244;IPI00623995;IPI00420152;IPI00551270;IPI00875552;IPI00918520	Q9D3A9-1	>IPI:IPI00113244.3|SWISS-PROT:Q9D3A9-1|ENSEMBL:ENSMUSP00000113937;ENSMUSP00000120182|REFSEQ:NP_001103235;NP_067299|VEGA:OTTMUSP00000024583;OTTMUSP00000039942 Tax_Id=10090 Gene_Symbol=Ttyh1 Isoform 1 of Protein tweety homolog 1;>IPI:IPI00623995.3|SWISS-PROT
8.43312	5.66476	2.97433	9.44287	16.419	14.1459	10.2957	10.6368	12.8217	17.284	8.55578	8.11227	10.5189	24.5038	24.667	25.0495	19.0313	6.52784	13.6791	16.2075	6.74354	8.14664	20.3165	22.9416	106	0.0450801	4	6;5;5;4	6	6	Dnajc5	DnaJ homolog subfamil	IPI00132206;IPI00875866;IPI00894804;IPI00751569	IPI00132206;IPI00875866;IPI00894804;IPI00751569	P60904	>IPI:IPI00132206.23|SWISS-PROT:P60904|TREMBL:A2AUE2;Q921J3|ENSEMBL:ENSMUSP00000072175;ENSMUSP00000104424;ENSMUSP00000104425|REFSEQ:NP_058055|VEGA:OTTMUSP00000018139;OTTMUSP00000018140;OTTMUSP00000018141 Tax_Id=10090 Gene_Symbol=Dnajc5 DnaJ homolog subfamil
3.92989	3.26137	4.95663	6.99056	5.25238	NaN	NaN	2.89251	NaN	NaN	22.2055	16.95	3.40009	13.7014	15.0577	6.62734	5.09892	10.9617	4.47908	5.55247	28.5299	18.7045	11.0283	32.0154	107	0.00199736	2	6;5	10	6	Hpcal4	Hippocalcin-like protein 4	IPI00221788;IPI00648514	IPI00221788;IPI00648514	Q8BGZ1	>IPI:IPI00221788.3|SWISS-PROT:Q8BGZ1|TREMBL:B2RRY8|ENSEMBL:ENSMUSP00000051487;ENSMUSP00000101853|REFSEQ:NP_778163|VEGA:OTTMUSP00000009309;OTTMUSP00000009310 Tax_Id=10090 Gene_Symbol=Hpcal4 Hippocalcin-like protein 4;>IPI:IPI00648514.1|ENSEMBL:ENSMUSP000001
0.728067	1.22859	0.909174	NaN	1.1743	1.20661	1.36171	1.44047	1.29288	1.57394	1.43262	1.01995	1.89437	1.93521	1.90832	1.52043	1.51619	1.47647	0.938174	1.62874	1.1558	1.28848	1.45973	1.30651	108	0.00587482	2	6;5	6	6	Tomm40	Mitochondrial import receptor subunit TOM40 homolog	IPI00474157;IPI00875326	IPI00474157;IPI00875326	Q9QYA2	>IPI:IPI00474157.4|SWISS-PROT:Q9QYA2|TREMBL:Q3UQD0|ENSEMBL:ENSMUSP00000104090|REFSEQ:NP_001103218;NP_058567 Tax_Id=10090 Gene_Symbol=Tomm40 Mitochondrial import receptor subunit TOM40 homolog;>IPI:IPI00875326.1|TREMBL:D3YVW7|ENSEMBL:ENSMUSP00000032555 Tax_
4.11641	4.46888	2.80458	4.55166	2.06207	5.86269	6.81431	3.98502	4.53885	5.28988	4.61169	3.71154	3.37564	5.66348	5.18726	6.52784	1.68158	2.72606	2.14588	5.77868	15.7223	11.3531	3.90001	8.93975	109	0.0274721	2	6;4	6	6	Slc6a1	Sodium- and chloride-dependent GABA transporter 1	IPI00227928;IPI00458246	IPI00227928;IPI00458246	P31648	>IPI:IPI00227928.3|SWISS-PROT:P31648|TREMBL:Q6PCX2|ENSEMBL:ENSMUSP00000032454|REFSEQ:NP_848818 Tax_Id=10090 Gene_Symbol=Slc6a1 Sodium- and chloride-dependent GABA transporter 1;>IPI:IPI00458246.1|TREMBL:Q8BPL9|ENSEMBL:ENSMUSP00000108618 Tax_Id=10090 Gene_S
1.96773	1.46744	2.97486	1.73001	NaN	0.87558	0.998303	2.74416	1.89649	2.10833	2.07181	1.58808	3.40646	2.73605	3.15637	3.01723	3.33756	1.57816	2.34351	2.31857	2.26968	2.39263	2.60105	2.07495	110	0.0356545	2	6;4	6	6	Mtx2	Metaxin-2	IPI00225254;IPI00874889	IPI00225254;IPI00874889	O88441	>IPI:IPI00225254.6|SWISS-PROT:O88441|TREMBL:A2AT31;Q8C454|ENSEMBL:ENSMUSP00000028511|REFSEQ:NP_058084|VEGA:OTTMUSP00000017897 Tax_Id=10090 Gene_Symbol=Mtx2 Metaxin-2;>IPI:IPI00874889.1|TREMBL:Q2M4G1;Q3TI19;Q3TI40|ENSEMBL:ENSMUSP00000107605 Tax_Id=10090 Gen
1	3.13165	3.58397	2.66085	8.52297	6.81803	8.91504	5.36107	5.47196	4.22994	3.40263	8.54336	3.30929	5.20102	3.75488	5.80417	3.87297	3.60607	NaN	3.34504	5.86201	8.03859	3.89438	8.04117	111	0.00863098	4	6;2;2;2	7	6	Gad1	Glutamate decarboxylase 1	IPI00318496	IPI00318496;IPI00919250;IPI00761321;IPI00918910	P48318	>IPI:IPI00318496.1|SWISS-PROT:P48318|TREMBL:Q3TQ56;Q548L6|ENSEMBL:ENSMUSP00000092539|REFSEQ:NP_032103|VEGA:OTTMUSP00000044832 Tax_Id=10090 Gene_Symbol=Gad1 Glutamate decarboxylase 1
5.08078	NaN	NaN	NaN	6.4914	4.95123	4.01929	4.85838	5.49571	5.87647	1.94932	NaN	NaN	NaN	3.03242	NaN	NaN	3.02654	NaN	NaN	2.46561	2.53749	1.5555	1.57322	112	0.0196325	7	5;5;5;5;5;1;1	5	5	Aldh3a2	Aldehyde dehydrogenase family 3, subfamily A2	IPI00515370;IPI00111235;IPI00761984;IPI00874350;IPI00405303	IPI00515370;IPI00111235;IPI00761984;IPI00874350;IPI00405303;IPI00890112;IPI00111222	B1ATI0	>IPI:IPI00515370.1|TREMBL:B1ATI0|ENSEMBL:ENSMUSP00000067767|VEGA:OTTMUSP00000006017 Tax_Id=10090 Gene_Symbol=Aldh3a2 Aldehyde dehydrogenase family 3, subfamily A2;>IPI:IPI00111235.2|TREMBL:Q8BQ93;Q99PH4|ENSEMBL:ENSMUSP00000071361 Tax_Id=10090 Gene_Symbol=A
6.18735	3.63306	3.98692	7.78513	6.39714	6.29644	4.02123	5.6205	3.5402	4.14267	3.24359	4.44405	2.89394	3.36089	5.88651	7.22909	3.81461	9.64878	4.87377	9.49127	11.2672	13.4577	8.15793	6.94879	113	0.0215269	2	5;5	5	5	Sh3gl3	Endophilin-A3	IPI00312771;IPI00890113	IPI00312771;IPI00890113	Q62421	>IPI:IPI00312771.7|SWISS-PROT:Q62421|ENSEMBL:ENSMUSP00000032874|REFSEQ:NP_059096 Tax_Id=10090 Gene_Symbol=Sh3gl3 Endophilin-A3;>IPI:IPI00890113.2|TREMBL:Q497N4;Q9CZV7|ENSEMBL:ENSMUSP00000112003 Tax_Id=10090 Gene_Symbol=Sh3gl3 Sh3gl3 protein
0.125144	1.31218	1.14271	0.854263	0.0299949	0.133704	0.0787091	0.0894455	0.254427	0.082149	0.066291	0.119554	NaN	NaN	0.232905	0.276955	1.69002	0.130029	0.103613	1.86227	0.062897	0.0670421	0.0800768	0.0285356	114	0.00954558	2	5;4	5	5	Slc1a5	58 kDa protein	IPI00875340;IPI00229548	IPI00875340;IPI00229548	P51912	>IPI:IPI00875340.1|ENSEMBL:ENSMUSP00000065887 Tax_Id=10090 Gene_Symbol=Slc1a5 58 kDa protein;>IPI:IPI00229548.4|SWISS-PROT:P51912|TREMBL:Q3UFR4;Q5U647;Q9ESU7|ENSEMBL:ENSMUSP00000104136|REFSEQ:NP_033227|VEGA:OTTMUSP00000025145 Tax_Id=10090 Gene_Symbol=Slc1a
3.87297	3.12042	3.44804	3.71195	5.52639	4.48451	4.40898	4.30533	7.06464	8.06516	5.91331	8.34029	2.43659	2.97725	6.42839	3.32325	5.6035	3.91573	6.85072	4.44267	4.5438	5.89484	6.85918	5.54816	115	0.00190296	3	8;2;1	8	5	RAB3A		IPI00122965	IPI00122965;IPI00807920;IPI00885980	P63011	>IPI:IPI00122965.1|SWISS-PROT:P63011|TREMBL:Q0PD63|ENSEMBL:ENSMUSP00000034301;ENSMUSP00000105717;ENSMUSP00000105719;ENSMUSP00000105720|REFSEQ:NP_001159871;NP_033027|VEGA:OTTMUSP00000018415;OTTMUSP00000018416;OTTMUSP00000018420;OTTMUSP00000025402 Tax_Id=100
1.21231	NaN	3.90473	4.10711	2.9298	2.8315	3.04368	3.57181	3.6075	4.33238	3.1501	3.885	2.90284	3.8301	2.81833	3.95366	2.22005	1.21412	1.07461	1.40685	2.86033	1.65514	3.7103	3.0567	116	0.00967495	10	6;6;6;6;6;6;6;5;5;5	6	4	Abi1	Isoform 1 of Abl interactor 1	IPI00798483;IPI00918951;IPI00551347;IPI00454179;IPI00918799;IPI00919052;IPI00659927;IPI00918813;IPI00918718;IPI00653749	IPI00798483;IPI00918951;IPI00551347;IPI00454179;IPI00918799;IPI00919052;IPI00659927;IPI00918813;IPI00918718;IPI00653749	Q8CBW3-1	>IPI:IPI00798483.1|SWISS-PROT:Q8CBW3-1|TREMBL:B7ZCT9|ENSEMBL:ENSMUSP00000118491|REFSEQ:NP_001070658|VEGA:OTTMUSP00000044764 Tax_Id=10090 Gene_Symbol=Abi1 Isoform 1 of Abl interactor 1;>IPI:IPI00918951.1|TREMBL:B7ZCU0|ENSEMBL:ENSMUSP00000088957|VEGA:OTTMUSP
NaN	4.21159	NaN	4.3956	6.1459	4.2935	7.56487	4.03486	NaN	4.02059	NaN	NaN	NaN	NaN	NaN	5.51481	NaN	7.20773	5.50267	NaN	9.3791	9.72573	12.9557	NaN	117	0.0129271	3	6;5;1	6	4	Ppm1h	Isoform 1 of Protein phosphatase 1H	IPI00620040;IPI00845733	IPI00620040;IPI00845733;IPI00329932	Q3UYC0-1	>IPI:IPI00620040.3|SWISS-PROT:Q3UYC0-1|ENSEMBL:ENSMUSP00000066561|REFSEQ:NP_001103688|VEGA:OTTMUSP00000043963 Tax_Id=10090 Gene_Symbol=Ppm1h Isoform 1 of Protein phosphatase 1H;>IPI:IPI00845733.1|SWISS-PROT:Q3UYC0-2|REFSEQ:NP_795893|VEGA:OTTMUSP00000043964
0.507357	0.803277	0.904404	0.983478	0.892698	0.907276	0.849546	1.23704	0.952835	0.947418	0.876962	0.763301	1.74624	0.784683	0.690131	0.988533	2.14169	1.00439	2.62192	NaN	0.812744	0.63597	0.864603	0.706664	118	0.0183376	2	4;4	4	4	Usp47	Isoform 1 of Ubiquitin carboxyl-terminal hydrolase 47	IPI00608091;IPI00420143	IPI00608091;IPI00420143	Q8BY87-1	>IPI:IPI00608091.1|SWISS-PROT:Q8BY87-1|TREMBL:Q32NY0|ENSEMBL:ENSMUSP00000081757 Tax_Id=10090 Gene_Symbol=Usp47 Isoform 1 of Ubiquitin carboxyl-terminal hydrolase 47;>IPI:IPI00420143.1|SWISS-PROT:Q8BY87-2|TREMBL:Q3UB96|ENSEMBL:ENSMUSP00000102264|REFSEQ:NP_5
NaN	3.06438	3.03242	2.19404	2.51383	NaN	2.24175	NaN	1.60367	2.16873	NaN	1.87963	1.8204	NaN	NaN	2.5303	0.0141625	NaN	1.14917	0.0500751	1.97804	NaN	1.36784	NaN	119	0.0320519	3	4;2;1	4	4	Kctd12	BTB/POZ domain-containing protein KCTD12	IPI00421206;IPI00968345	IPI00421206;IPI00968345;IPI00775881	Q6WVG3	>IPI:IPI00421206.1|SWISS-PROT:Q6WVG3|TREMBL:Q69ZA6|REFSEQ:NP_808383 Tax_Id=10090 Gene_Symbol=Kctd12 BTB/POZ domain-containing protein KCTD12;>IPI:IPI00968345.1|TREMBL:Q8CBQ4 Tax_Id=10090 Gene_Symbol=Kctd12 Putative uncharacterized protein
4.15541	6.8055	NaN	NaN	8.51064	5.75805	7.67814	7.77544	6.38488	3.00824	2.71842	NaN	0.137212	0.822098	1.901	NaN	4.11523	4.15041	8.1813	2.07948	7.43108	6.26527	2.27936	4.69373	120	0.00426371	2	4;2	4	4	Epdr1	Isoform 1 of Mammalian ependymin-related protein 1	IPI00316989;IPI00889272	IPI00316989;IPI00889272	Q99M71-1	>IPI:IPI00316989.7|SWISS-PROT:Q99M71-1|ENSEMBL:ENSMUSP00000002885|REFSEQ:NP_598826 Tax_Id=10090 Gene_Symbol=Epdr1 Isoform 1 of Mammalian ependymin-related protein 1;>IPI:IPI00889272.1|SWISS-PROT:Q99M71-2 Tax_Id=10090 Gene_Symbol=Epdr1 Isoform 2 of Mammalia
NaN	0.583294	NaN	NaN	0.563539	0.586441	0.544425	0.884408	NaN	0.66291	NaN	NaN	0.250803	0.114428	NaN	0.281254	NaN	0.877347	0.580754	NaN	NaN	0.461766	NaN	NaN	121	0.00821452	4	3;3;3;3	3	3	Myo1b	myosin-Ib isoform 1	IPI00408215;IPI00124281;IPI00720223;IPI00720185	IPI00408215;IPI00124281;IPI00720223;IPI00720185	P46735-1	>IPI:IPI00408215.1|SWISS-PROT:P46735-1|TREMBL:Q7TQD7|ENSEMBL:ENSMUSP00000018561|REFSEQ:NP_001155289|VEGA:OTTMUSP00000017715 Tax_Id=10090 Gene_Symbol=Myo1b myosin-Ib isoform 1;>IPI:IPI00124281.4|TREMBL:Q3UEQ4;Q80VD8|ENSEMBL:ENSMUSP00000040447|REFSEQ:NP_0349
6.02301	5.10621	4.69065	6.8918	6.6569	3.58346	8.50196	6.82827	10.1866	7.6476	14.8089	7.11086	4.50979	4.36148	2.2604	3.85312	6.98861	4.24484	13.9725	16.9173	10.3567	15.0047	13.1366	13.2792	122	0.00178717	3	3;3;3	3	3	Pcp4;Igsf5	Putative uncharacterized protein Pcp4	IPI00831305;IPI00875040;IPI00229996	IPI00831305;IPI00875040;IPI00229996	D3YXH0;D3YXH4	>IPI:IPI00831305.1|TREMBL:D3YXH0;D3YXH4|ENSEMBL:ENSMUSP00000109419;ENSMUSP00000109426|VEGA:OTTMUSP00000022265 Tax_Id=10090 Gene_Symbol=Pcp4 Putative uncharacterized protein Pcp4;>IPI:IPI00875040.1|TREMBL:D3YXH7|ENSEMBL:ENSMUSP00000109416 Tax_Id=10090 Gene_
1.77923	1.47206	1.7917	0.939673	2.6213	4.32826	NaN	3.45209	NaN	NaN	NaN	1.88993	2.46846	NaN	1.10075	3.80764	1.01542	3.61637	3.42548	1.03745	3.58757	7.23903	3.83112	3.53244	123	0.0494041	3	3;3;2	3	3	Uqcrb	Ubiquinol-cytochrome c reductase binding protein	IPI00132347;IPI00555000;IPI00121419	IPI00132347;IPI00555000;IPI00121419	Q9CQB4	>IPI:IPI00132347.1|TREMBL:Q9CQB4|ENSEMBL:ENSMUSP00000021993|REFSEQ:NP_080495 Tax_Id=10090 Gene_Symbol=Uqcrb Ubiquinol-cytochrome c reductase binding protein;>IPI:IPI00555000.2|SWISS-PROT:Q9D855 Tax_Id=10090 Gene_Symbol=Uqcrb Cytochrome b-c1 complex subunit
5.55803	4.61297	NaN	NaN	1.38846	2.84349	1.23472	3.58487	NaN	NaN	2.57301	NaN	3.62555	NaN	NaN	8.3647	NaN	5.85172	NaN	4.27844	5.09528	5.77134	5.80652	NaN	124	0.0441163	2	3;3	3	3	Fn3krp	Ketosamine-3-kinase	IPI00321994;IPI00943373	IPI00321994;IPI00943373	Q8K274	>IPI:IPI00321994.1|SWISS-PROT:Q8K274 Tax_Id=10090 Gene_Symbol=Fn3krp Ketosamine-3-kinase;>IPI:IPI00943373.1|TREMBL:B1ATT5;Q8BHV7|ENSEMBL:ENSMUSP00000038061|REFSEQ:NP_852085|VEGA:OTTMUSP00000004996 Tax_Id=10090 Gene_Symbol=Fn3krp ketosamine-3-kinase
3.42513	2.57666	2.92903	NaN	1.29862	1.0954	NaN	NaN	1.35647	1.47386	1.61697	1.37529	1.8614	7.48671	32.3321	4.32676	NaN	1.23358	0.92302	NaN	NaN	NaN	NaN	1.76264	125	0.0285862	6	3;2;1;1;1;1	3	3	Amotl2	Angiomotin like 2	IPI00918866;IPI00263333	IPI00918866;IPI00263333;IPI00919094;IPI00651847;IPI00919159;IPI00919249	B8JK87	>IPI:IPI00918866.1|TREMBL:B8JK87|ENSEMBL:ENSMUSP00000121113|VEGA:OTTMUSP00000044939 Tax_Id=10090 Gene_Symbol=Amotl2 Angiomotin like 2;>IPI:IPI00263333.1|SWISS-PROT:Q8K371-1|TREMBL:B8JK80|ENSEMBL:ENSMUSP00000035121|REFSEQ:NP_062738|VEGA:OTTMUSP00000044938 T
0.476599	0.802504	0.526676	0.674218	0.504999	0.3475	0.38959	0.361664	0.449297	0.608532	0.507099	0.554785	1.37525	0.96432	0.658371	0.966557	0.364445	0.76646	0.923446	0.532538	0.505561	0.617627	0.722022	0.52086	126	0.00458822	2	3;2	3	3	Pmpca	Mitochondrial-processing peptidase subunit alpha	IPI00120199;IPI00750433	IPI00120199;IPI00750433	Q9DC61	>IPI:IPI00120199.1|SWISS-PROT:Q9DC61|TREMBL:A2AIW8;Q3TTM6;Q3TY06;Q3UDE0;Q8BK51|ENSEMBL:ENSMUSP00000075762|REFSEQ:NP_775272|VEGA:OTTMUSP00000013720 Tax_Id=10090 Gene_Symbol=Pmpca Mitochondrial-processing peptidase subunit alpha;>IPI:IPI00750433.1|TREMBL:A2A
NaN	6.67601	2.21971	NaN	2.87944	2.60125	2.60886	4.11032	4.20486	8.07689	4.566	8.24199	2.78466	2.26516	2.37135	2.77793	12.3531	4.56308	3.12246	4.43676	2.53556	1.49218	3.18949	2.94559	127	0.0237233	2	3;2	3	3	Scrn2	Secernin-2	IPI00121931;IPI00648832	IPI00121931;IPI00648832	Q8VCA8	>IPI:IPI00121931.1|SWISS-PROT:Q8VCA8|TREMBL:A2A712|ENSEMBL:ENSMUSP00000021249|REFSEQ:NP_666139|VEGA:OTTMUSP00000001819 Tax_Id=10090 Gene_Symbol=Scrn2 Secernin-2;>IPI:IPI00648832.2|TREMBL:A2A709;Q91XF1|ENSEMBL:ENSMUSP00000116606|VEGA:OTTMUSP00000001822 Tax_
0.50505	0.582615	0.578302	1.13065	0.602882	0.532879	0.483536	0.892459	0.646245	0.968242	0.839208	0.527287	0.90629	1.16433	0.817127	0.647836	0.386653	0.589623	0.323667	0.46477	0.580855	0.587579	0.610724	0.935016	128	0.0467085	3	3;1;1	3	3	Eif3k	Isoform 1 of Eukaryotic translation initiation factor 3 subunit K	IPI00120322	IPI00120322;IPI00170052;IPI00762610	Q9DBZ5-1	>IPI:IPI00120322.1|SWISS-PROT:Q9DBZ5-1|ENSEMBL:ENSMUSP00000066038|REFSEQ:NP_082935 Tax_Id=10090 Gene_Symbol=Eif3k Isoform 1 of Eukaryotic translation initiation factor 3 subunit K
0.159663	0.138334	0.150283	0.237654	0.0660458	0.0828981	0.0750356	0.061954	0.0972195	0.0945716	0.0788395	0.0872372	0.245888	0.2437	0.169624	0.148282	0.179045	0.0714796	0.0631273	0.268933	0.115088	0.103817	0.108156	0.0723118	129	0.00379904	2	3;1	3	3	3110003A17Rik;Abracl	UPF0727 protein C6orf115 homolog	IPI00856307	IPI00856307;IPI00665965	Q4KML4	>IPI:IPI00856307.2|SWISS-PROT:Q4KML4|ENSEMBL:ENSMUSP00000020002|REFSEQ:NP_082716 Tax_Id=10090 Gene_Symbol=3110003A17Rik UPF0727 protein C6orf115 homolog
12.2237	7.64	5.89345	8.45523	9.10167	7.20046	9.15164	6.61419	8.68583	5.86613	4.66505	8.52951	3.65631	4.67377	4.88329	5.34102	8.75964	6.18391	21.5508	9.13493	8.87548	15.8263	9.90884	13.6049	130	0.00854873	5	20;7;3;1;1	20	3	Beta-globin;Hbbt1		IPI00831055	IPI00831055;IPI00316491;IPI00855108;IPI00555131;IPI00751307	A8DUK7	>IPI:IPI00831055.2|TREMBL:A8DUK7|ENSEMBL:ENSMUSP00000115607|VEGA:OTTMUSP00000020531 Tax_Id=10090 Gene_Symbol=- Beta-globin
5.97122	3.46945	3.57718	2.41179	6.02555	4.34197	4.50511	4.17484	4.22529	4.13462	4.57101	5.44455	1.51046	3.43336	4.80238	4.50532	1.96186	3.33422	1.93065	2.31707	5.10204	6.21272	7.17309	3.40298	131	0.0237515	6	22;21;21;3;2;2	22	21	Atp8a1	probable phospholipid-transporting ATPase IA isoform a	IPI00831373;IPI00466422;IPI00112776	IPI00831373;IPI00466422;IPI00112776;IPI00830483;IPI00830255;IPI00830370	Q5DTG0;Q8BR88	>IPI:IPI00831373.1|TREMBL:Q5DTG0;Q8BR88|ENSEMBL:ENSMUSP00000042215|REFSEQ:NP_001034088|VEGA:OTTMUSP00000025685 Tax_Id=10090 Gene_Symbol=Atp8a1 probable phospholipid-transporting ATPase IA isoform a;>IPI:IPI00466422.2|TREMBL:A1L332;Q52KQ7|ENSEMBL:ENSMUSP000
4.67618	3.00165	3.46993	4.65289	5.17813	4.7081	2.602	4.27168	4.68274	5.40132	2.74899	5.62556	3.29685	5.59222	5.17304	5.38503	3.34818	3.78	4.45236	6.28931	13.6724	17.7054	10.1324	3.39697	132	0.041002	2	20;17	20	20	Pam	Peptidyl-glycine alpha-amidating monooxygenase	IPI00323974;IPI00651793	IPI00323974;IPI00651793	P97467	>IPI:IPI00323974.7|SWISS-PROT:P97467|ENSEMBL:ENSMUSP00000057112|REFSEQ:NP_038654 Tax_Id=10090 Gene_Symbol=Pam Peptidyl-glycine alpha-amidating monooxygenase;>IPI:IPI00651793.2|TREMBL:A1L331;Q3V1A8;Q8BQ31|ENSEMBL:ENSMUSP00000095228 Tax_Id=10090 Gene_Symbol=
0.146981	0.461617	0.547735	0.490316	NaN	NaN	NaN	0.518403	0.102369	0.205859	NaN	NaN	0.887311	0.471676	0.372967	0.505612	0.246621	NaN	NaN	0.228535	0.348408	0.200072	0.203227	0.15634	133	0.0321081	10	2;2;2;2;1;1;1;1;1;1	2	2	LOC100045157;Rpl36-ps3;Rpl36		IPI00474487;IPI00849174;IPI00869475;IPI00463297;IPI00113713;IPI00956939;IPI00230679;IPI00351871;IPI00755959;IPI00889996	IPI00474487;IPI00849174;IPI00869475;IPI00463297;IPI00113713;IPI00956939;IPI00230679;IPI00351871;IPI00755959;IPI00889996	D3YW41	>IPI:IPI00474487.1|TREMBL:D3YW41|ENSEMBL:ENSMUSP00000082867|REFSEQ:XP_001473913;XP_001480355 Tax_Id=10090 Gene_Symbol=LOC100045157;Rpl36-ps3 60S ribosomal protein L36;>IPI:IPI00849174.1|REFSEQ:XP_001480122;XP_001480771 Tax_Id=10090 Gene_Symbol=Gm4604 simil
1.14641	1.47284	NaN	NaN	1.4778	1.46323	1.28732	1.57067	1.34606	1.10725	1.28967	1.30482	0.485036	0.574845	1.41309	0.539549	NaN	1.48943	0.96432	NaN	1.73883	1.34041	1.72203	1.32977	134	0.00875377	3	2;2;0	13	2	Cyfip1	Isoform 1 of Cytoplasmic FMR1-interacting protein 1	IPI00330476;IPI00831544	IPI00330476;IPI00831544;IPI00473355	Q7TMB8-1	>IPI:IPI00330476.3|SWISS-PROT:Q7TMB8-1|ENSEMBL:ENSMUSP00000032629|REFSEQ:NP_001158133;NP_035500 Tax_Id=10090 Gene_Symbol=Cyfip1 Isoform 1 of Cytoplasmic FMR1-interacting protein 1;>IPI:IPI00831544.1|SWISS-PROT:Q7TMB8-2|ENSEMBL:ENSMUSP00000082353|REFSEQ:NP_
3.93005	2.291	3.50853	3.32347	4.38347	5.58254	4.88543	NaN	4.34405	3.10936	4.02188	4.0783	2.18469	1.81505	2.43611	3.26808	2.90901	NaN	6.12145	2.67494	NaN	10.3331	5.65259	2.90563	135	0.0490176	3	2;1;1	3	2	Slc4a10	Isoform 1 of Sodium-driven chloride bicarbonate exchanger	IPI00752501;IPI00227302;IPI00555118	IPI00752501;IPI00227302;IPI00555118	Q5DTL9-1	>IPI:IPI00752501.2|SWISS-PROT:Q5DTL9-1|TREMBL:B1AWV8|ENSEMBL:ENSMUSP00000108099|VEGA:OTTMUSP00000013681 Tax_Id=10090 Gene_Symbol=Slc4a10 Isoform 1 of Sodium-driven chloride bicarbonate exchanger;>IPI:IPI00227302.6|TREMBL:B1AWV9;Q8C943|ENSEMBL:ENSMUSP000000
1.74795	0.795292	2.15592	3.75136	5.12006	4.1088	3.97093	5.60853	4.18813	6.60502	4.77076	4.53022	1.94496	1.99605	2.43197	3.15696	1.2313	4.00593	1.7477	6.0757	4.81928	4.12405	2.84156	3.58141	136	0.0242984	2	3;2	6	2	Kras	Isoform 2B of GTPase KRas	IPI00134941;IPI00113248	IPI00134941;IPI00113248	P32883-2	>IPI:IPI00134941.1|SWISS-PROT:P32883-2|TREMBL:Q3U2W7;Q5J7N1|ENSEMBL:ENSMUSP00000032399|REFSEQ:NP_067259|VEGA:OTTMUSP00000025006;OTTMUSP00000042608 Tax_Id=10090 Gene_Symbol=Kras Isoform 2B of GTPase KRas;>IPI:IPI00113248.1|SWISS-PROT:P32883-1|TREMBL:Q0VDV7|
3.76011	4.18375	4.3779	4.15731	5.2751	6.11135	5.98767	2.28284	5.27065	5.59973	4.86121	5.88616	1.94829	3.20195	3.7294	3.47162	4.1449	3.77701	4.29997	8.48176	5.80652	7.44325	6.55222	8.46955	137	0.0131867	3	28;24;24	28	18	Atp2b4	Plasma membrane Ca++ transporting ATPase 4 variant x/e	IPI00463589;IPI00751474;IPI00750917	IPI00463589;IPI00751474;IPI00750917	D1FNM8;Q6Q476	>IPI:IPI00463589.2|TREMBL:D1FNM8;Q6Q476|ENSEMBL:ENSMUSP00000083673;ENSMUSP00000116941|REFSEQ:NP_001161421|VEGA:OTTMUSP00000021380 Tax_Id=10090 Gene_Symbol=Atp2b4 Plasma membrane Ca++ transporting ATPase 4 variant x/e;>IPI:IPI00751474.1|TREMBL:Q6Q477|ENSEMB
0.173977	0.336893	0.182003	0.0771605	0.102096	0.0802504	0.0839631	0.0804894	0.270248	0.204219	0.258045	0.25057	NaN	0.117705	0.166257	0.10926	0.146443	0.151384	0.165483	0.0737246	0.0416788	0.0925155	0.162064	0.118167	138	0.0178535	5	17;9;1;1;1	17	17	Mcm7	Putative uncharacterized protein	IPI00126396;IPI00857053	IPI00126396;IPI00857053;IPI00856765;IPI00856825;IPI00857062	Q61881	>IPI:IPI00126396.2|SWISS-PROT:Q61881|TREMBL:Q3U4T8;Q3UDI8;Q3V122|ENSEMBL:ENSMUSP00000000505|REFSEQ:NP_032594|VEGA:OTTMUSP00000025921 Tax_Id=10090 Gene_Symbol=Mcm7 Putative uncharacterized protein;>IPI:IPI00857053.1|TREMBL:D3Z6N3|ENSEMBL:ENSMUSP00000116131|
11.7687	3.444	4.35616	4.24088	8.77424	7.03284	5.567	7.28438	8.65276	9.5057	5.40891	8.83783	3.91773	4.40122	5.66701	4.89716	8.24742	6.4658	7.74293	7.76639	6.88468	12.7416	11.1445	13.9655	139	0.0120835	3	17;11;11	18	17	Ldhb	L-lactate dehydrogenase B chain	IPI00229510;IPI00280156;IPI00776197	IPI00229510;IPI00280156;IPI00776197	P16125	>IPI:IPI00229510.5|SWISS-PROT:P16125|TREMBL:Q5M8R7|ENSEMBL:ENSMUSP00000032373|REFSEQ:NP_032518|VEGA:OTTMUSP00000017612 Tax_Id=10090 Gene_Symbol=Ldhb L-lactate dehydrogenase B chain;>IPI:IPI00280156.2|REFSEQ:XP_904967 Tax_Id=10090 Gene_Symbol=Gm5514 hypothe
6.90417	4.44504	3.94929	2.9663	5.21023	6.18735	6.25821	3.40229	2.79798	3.77929	4.98604	5.56297	1.8568	4.66113	4.5159	4.60469	4.34122	4.33201	12.5534	5.1435	7.05816	9.14244	8.31117	9.37823	140	0.0499911	8	17;17;17;11;2;2;2;1	17	16	Trim2	Putative uncharacterized protein	IPI00776324;IPI00776240;IPI00113430;IPI00406721	IPI00776324;IPI00776240;IPI00113430;IPI00406721;IPI00956915;IPI00459766;IPI00776398;IPI00956960	Q3URK9;Q5DU27	>IPI:IPI00776324.1|TREMBL:Q3URK9;Q5DU27|ENSEMBL:ENSMUSP00000049902;ENSMUSP00000103322|VEGA:OTTMUSP00000019078 Tax_Id=10090 Gene_Symbol=Trim2 Putative uncharacterized protein;>IPI:IPI00776240.1|TREMBL:Q3TPI3;Q3UHH4|ENSEMBL:ENSMUSP00000103323|VEGA:OTTMUSP000
1.46718	0.0980777	0.64587	NaN	4.02091	NaN	5.69508	0.672631	2.35638	1.49298	2.07207	0.604778	2.59713	5.11797	3.33912	7.17103	5.51694	4.20928	NaN	4.64792	0.747161	5.64908	4.65289	4.94658	141	0.0320224	3	15;13;13	15	15	Ptprn2	receptor-type tyrosine-protein phosphatase N2 precursor	IPI00928012;IPI00118191;IPI00853969	IPI00928012;IPI00118191;IPI00853969	A3KN68;Q1RLJ1;Q3UU93;Q571D4;Q70FG5	>IPI:IPI00928012.1|TREMBL:A3KN68;Q1RLJ1;Q3UU93;Q571D4;Q70FG5|ENSEMBL:ENSMUSP00000064046|REFSEQ:NP_035345 Tax_Id=10090 Gene_Symbol=Ptprn2 receptor-type tyrosine-protein phosphatase N2 precursor;>IPI:IPI00118191.2|SWISS-PROT:P80560 Tax_Id=10090 Gene_Symbol=P
NaN	0.957488	NaN	0.594212	3.35199	3.14961	1.84094	1.37624	2.57619	5.35332	2.59909	2.93401	1.1617	2.68738	2.03335	3.72689	1.62731	2.55931	NaN	1.14145	1.01388	1.20353	0.491111	0.229316	142	0.00291394	2	17;2	17	15	Acsbg1	Long-chain-fatty-acid--CoA ligase ACSBG1	IPI00453834	IPI00453834;IPI00886285	Q99PU5	>IPI:IPI00453834.2|SWISS-PROT:Q99PU5|ENSEMBL:ENSMUSP00000034822|REFSEQ:NP_444408|VEGA:OTTMUSP00000039208 Tax_Id=10090 Gene_Symbol=Acsbg1 Long-chain-fatty-acid--CoA ligase ACSBG1
7.15768	8.10373	6.35082	3.20072	7.71605	7.09623	7.54546	6.5028	4.879	6.30596	5.56731	5.27732	4.41989	7.01508	7.30034	10.1344	3.18939	3.97425	3.39397	4.93267	7.97321	8.21153	8.55066	8.55213	143	0.00407377	3	14;7;5	14	14	Cpe	Carboxypeptidase E	IPI00119152;IPI00849398	IPI00119152;IPI00849398;IPI00750192	Q00493	>IPI:IPI00119152.1|SWISS-PROT:Q00493|TREMBL:Q543R4|ENSEMBL:ENSMUSP00000048555|REFSEQ:NP_038522 Tax_Id=10090 Gene_Symbol=Cpe Carboxypeptidase E;>IPI:IPI00849398.1|REFSEQ:XP_001476247 Tax_Id=10090 Gene_Symbol=LOC100046434 similar to carboxypeptidase E
33.5785	16.4349	9.44822	8.94774	32.4623	28.1065	20.2094	9.77422	14.9185	10.5148	14.184	14.4766	9.85416	9.997	11.7845	11.6784	22.1214	27.2309	45.901	17.5356	28.0277	26.3553	27.2978	51.0699	144	0.00897493	3	14;11;8	14	14	Plp1	Isoform 1 of Myelin proteolipid protein	IPI00263013;IPI00121091;IPI00230610	IPI00263013;IPI00121091;IPI00230610	P60202-1	>IPI:IPI00263013.4|SWISS-PROT:P60202-1|TREMBL:Q3UYM8|ENSEMBL:ENSMUSP00000033800|REFSEQ:NP_035253|VEGA:OTTMUSP00000017800 Tax_Id=10090 Gene_Symbol=Plp1 Isoform 1 of Myelin proteolipid protein;>IPI:IPI00121091.1|TREMBL:Q62079|ENSEMBL:ENSMUSP00000033801 Tax_I
8.72677	5.03322	3.74939	4.83629	8.32432	8.33056	8.41397	4.7694	8.16393	6.66178	6.69165	10.5252	3.14031	3.92049	6.89988	4.3352	6.18468	6.69523	6.40246	2.79252	8.06126	12.0308	11.1531	16.0195	145	0.00579926	2	20;7	20	13	Syt1	Synaptotagmin-1	IPI00129618	IPI00129618;IPI00750142	P46096	>IPI:IPI00129618.1|SWISS-PROT:P46096|TREMBL:Q3TPT3|ENSEMBL:ENSMUSP00000063293;ENSMUSP00000100912|REFSEQ:NP_033332|VEGA:OTTMUSP00000017428;OTTMUSP00000021532 Tax_Id=10090 Gene_Symbol=Syt1 Synaptotagmin-1
0.0356595	0.179804	0.156233	0.111307	0.0572475	0.0548727	0.037723	0.0306589	0.0602991	0.0450755	0.0826105	0.053339	0.326211	0.0668628	0.0576968	0.125862	0.0679255	0.0622743	0.14624	0.0854555	0.0358603	0.0323855	0.0272398	0.0459116	146	0.0192546	10	13;13;13;13;13;13;13;13;13;13	13	13	LOC674678;Hist1h4a; Hist1h4b; Hist1h4c; Hist1h4d; Hist1h4f; Hist1h4h; Hist1h4i; Hist1h4j; Hist1h4m; Hist2h4a; Hist4h4	similar to histone H4	IPI00623776;IPI00624840;IPI00624933;IPI00844736;IPI00329998;IPI00621374;IPI00621789;IPI00874920;IPI00876005;IPI00407339	IPI00623776;IPI00624840;IPI00624933;IPI00844736;IPI00329998;IPI00621374;IPI00621789;IPI00874920;IPI00876005;IPI00407339	Q6PDS7;P02304;Q3V066;P02305;Q2M2Q5;Q9D0C9;A4QMY0;B2RTM0;A4FUP8;Q811M0;Q9D6Q8;Q0VDL9;Q61667;A0AUM5;Q6B822;P62806;Q5T006	>IPI:IPI00623776.3|REFSEQ:XP_981474 Tax_Id=10090 Gene_Symbol=LOC674678 similar to histone H4;>IPI:IPI00624840.2|ENSEMBL:ENSMUSP00000078039;ENSMUSP00000089340 Tax_Id=10090 Gene_Symbol=- 12 kDa protein;>IPI:IPI00624933.1|ENSEMBL:ENSMUSP00000077653 Tax_Id=100
2.16338	2.35018	2.52793	2.6651	NaN	4.48692	2.98187	NaN	NaN	NaN	NaN	1.91351	NaN	NaN	NaN	9.48857	4.27004	3.39743	NaN	2.23714	6.68404	2.8701	5.0875	5.43124	147	0.0452432	4	13;13;1;1	13	13	Sbf1	myotubularin-related protein 5 isoform 1	IPI00752390;IPI00875821	IPI00752390;IPI00875821;IPI00944186;IPI00918644	B2RXX4	>IPI:IPI00752390.4|TREMBL:B2RXX4|ENSEMBL:ENSMUSP00000080149;ENSMUSP00000118107|REFSEQ:NP_001164032|VEGA:OTTMUSP00000043337 Tax_Id=10090 Gene_Symbol=Sbf1 myotubularin-related protein 5 isoform 1;>IPI:IPI00875821.1|SWISS-PROT:Q6ZPE2|TREMBL:B2RXQ1;B7ZWK2;D3Z1
5.46896	3.4125	2.88792	5.5267	12.6515	5.95593	7.34916	6.8861	4.60448	3.93561	2.42571	2.83334	0.614704	3.23457	2.86911	3.88485	3.60321	6.6836	3.99026	4.11879	5.0449	9.20895	6.25352	7.48447	148	0.00736278	2	13;13	21	13	Pygm	Glycogen phosphorylase, muscle form	IPI00225275;IPI00831057	IPI00225275;IPI00831057	Q9WUB3	>IPI:IPI00225275.5|SWISS-PROT:Q9WUB3|ENSEMBL:ENSMUSP00000047564|REFSEQ:NP_035354|VEGA:OTTMUSP00000020157 Tax_Id=10090 Gene_Symbol=Pygm Glycogen phosphorylase, muscle form;>IPI:IPI00831057.1|TREMBL:Q9CTZ0|ENSEMBL:ENSMUSP00000109111|VEGA:OTTMUSP00000023596 T
8.19001	3.2281	3.66367	5.73197	4.02917	1.86189	0.992162	3.46069	1.80356	2.32369	1.31377	1.33797	4.12031	6.30636	4.45117	4.97043	3.96259	2.17865	3.53995	6.05804	2.88292	NaN	3.36157	1.77911	149	0.00769536	3	13;12;2	13	13	Enpp6	Ectonucleotide pyrophosphatase/phosphodiesterase family member 6	IPI00308077;IPI00886258	IPI00308077;IPI00886258;IPI00885765	Q8BGN3	>IPI:IPI00308077.6|SWISS-PROT:Q8BGN3|ENSEMBL:ENSMUSP00000044608|REFSEQ:NP_796278|VEGA:OTTMUSP00000039732 Tax_Id=10090 Gene_Symbol=Enpp6 Ectonucleotide pyrophosphatase/phosphodiesterase family member 6;>IPI:IPI00886258.1|TREMBL:D3YU63|ENSEMBL:ENSMUSP0000011
6.63746	3.53382	3.05652	4.45991	22.979	9.58589	11.2633	5.84727	7.7676	6.37349	4.09366	6.64894	3.36146	4.31369	9.81065	NaN	5.52364	4.0858	4.46428	5.86338	8.25696	5.44395	11.0725	15.3643	150	0.0259622	4	13;12;12;13	26	13	Atp2b3	ATPase, Ca++ transporting, plasma membrane 3	IPI00776035;IPI00265299;IPI00621162;IPI00785299	IPI00776035;IPI00265299;IPI00621162;IPI00785299	A2ALL9	>IPI:IPI00776035.1|TREMBL:A2ALL9|ENSEMBL:ENSMUSP00000110123|VEGA:OTTMUSP00000019514 Tax_Id=10090 Gene_Symbol=Atp2b3 ATPase, Ca++ transporting, plasma membrane 3;>IPI:IPI00265299.3|TREMBL:Q0VF55|ENSEMBL:ENSMUSP00000085775|REFSEQ:NP_796210|VEGA:OTTMUSP000000
0.0963205	0.050857	0.043191	0.128763	0.0406521	0.0232072	0.0293971	0.0256174	0.0714898	0.0685589	0.0666356	0.119031	0.0322186	0.0255787	0.0464382	0.0294464	0.0881368	0.0351247	0.040334	0.0842602	0.0633031	0.0841255	0.0272762	0.0602083	151	0.00902322	8	13;11;4;4;4;4;1;1	13	13	Gm10259;Kpna2;Gm10184;Kpna2; Rch1		IPI00124973;IPI00648356	IPI00124973;IPI00648356;IPI00850852;IPI00853964;IPI00857704;IPI00648623;IPI00649538;IPI00857980	P52293	>IPI:IPI00124973.1|SWISS-PROT:P52293|TREMBL:Q52L97;Q641N9|ENSEMBL:ENSMUSP00000018506|REFSEQ:NP_034785;XP_001473221;XP_001481264|VEGA:OTTMUSP00000003739 Tax_Id=10090 Gene_Symbol=Gm10259;Kpna2;Gm10184 Importin subunit alpha-2;>IPI:IPI00648356.2|REFSEQ:XP_001
5.16716	3.93794	4.80631	NaN	0.444425	1.59543	2.71976	2.09916	0.964506	0.839349	2.99832	4.15403	2.64347	2.66631	3.71816	2.81714	4.25062	2.96551	7.4366	4.56559	7.77303	7.29235	3.38478	8.48464	152	0.00728618	3	12;12;4	12	12	Wdr47	WD repeat-containing protein 47	IPI00330193;IPI00890345	IPI00330193;IPI00890345;IPI00648495	Q8CGF6	>IPI:IPI00330193.3|SWISS-PROT:Q8CGF6 Tax_Id=10090 Gene_Symbol=Wdr47 WD repeat-containing protein 47;>IPI:IPI00890345.1|TREMBL:A2AGC7;Q8C8E3;Q8CEH9|ENSEMBL:ENSMUSP00000057482|REFSEQ:NP_852065|VEGA:OTTMUSP00000007713 Tax_Id=10090 Gene_Symbol=Wdr47 WD repeat-
NaN	5.49028	3.64007	6.32151	NaN	5.6101	8.94215	5.56793	5.45971	7.75916	4.50979	9.86875	3.22342	5.06868	2.68514	2.96727	2.08325	4.34915	5.00902	1.87164	6.24961	8.82535	NaN	NaN	153	0.0202154	2	11;8	11	11	Acsf2	Acyl-CoA synthetase family member 2, mitochondrial	IPI00122633;IPI00351472	IPI00122633;IPI00351472	Q8VCW8	>IPI:IPI00122633.3|SWISS-PROT:Q8VCW8|ENSEMBL:ENSMUSP00000099453|REFSEQ:NP_722502|VEGA:OTTMUSP00000001958 Tax_Id=10090 Gene_Symbol=Acsf2 Acyl-CoA synthetase family member 2, mitochondrial;>IPI:IPI00351472.1|TREMBL:D3YV47|ENSEMBL:ENSMUSP00000053276 Tax_Id=10
17.8878	8.89759	9.56755	7.3497	11.5052	15.0313	10.7949	12.3988	11.8153	12.2729	11.0829	14.1397	5.83158	5.91646	12.6764	8.31462	5.45435	9.35454	19.6522	9.37031	16.3838	23.571	20.389	18.0897	154	0.0175852	5	11;11;11;8;4	11	11	Prdx5	Isoform Mitochondrial of Peroxiredoxin-5, mitochondrial	IPI00129517;IPI00969326;IPI00759999;IPI00475031	IPI00129517;IPI00969326;IPI00759999;IPI00475031;IPI00474055	P99029-1	>IPI:IPI00129517.1|SWISS-PROT:P99029-1|TREMBL:Q3U7H9;Q3UWS9|ENSEMBL:ENSMUSP00000025904|REFSEQ:NP_036151|VEGA:OTTMUSP00000023383 Tax_Id=10090 Gene_Symbol=Prdx5 Isoform Mitochondrial of Peroxiredoxin-5, mitochondrial;>IPI:IPI00969326.1|TREMBL:Q91YU9|ENSEMBL:
3.13962	2.84051	2.6222	2.95832	7.91264	9.36242	6.05951	5.5374	2.30974	6.14704	6.99888	1.98161	2.75103	4.71054	3.56608	4.66766	3.80532	4.49256	6.43252	3.15956	4.47648	6.12933	6.62866	8.54482	155	0.0153523	4	10;10;9;8	10	10	Sept3; Sep3	Isoform 1 of Neuronal-specific septin-3	IPI00845776;IPI00808312;IPI00761331;IPI00554848	IPI00845776;IPI00808312;IPI00761331;IPI00554848	Q9Z1S5-1	>IPI:IPI00845776.1|SWISS-PROT:Q9Z1S5-1|ENSEMBL:ENSMUSP00000112124 Tax_Id=10090 Gene_Symbol=Sept3 Isoform 1 of Neuronal-specific septin-3;>IPI:IPI00808312.2|SWISS-PROT:Q9Z1S5-2|ENSEMBL:ENSMUSP00000023095|REFSEQ:NP_036019 Tax_Id=10090 Gene_Symbol=Sept3 Isofo
8.63036	4.74834	5.27343	5.41418	10.3009	10.224	8.28706	7.80762	10.1152	10.1909	10.2607	11.517	4.48893	6.16789	8.34446	4.9586	4.98157	5.60569	12.1115	6.53168	9.7542	12.8396	11.5072	10.7281	156	0.00197785	3	16;1;1	16	1	Gnao1	Isoform Alpha-1 of Guanine nucleotide-binding protein G(o) subunit	IPI00230192	IPI00230192;IPI00928543;IPI00927995	P18872-1	>IPI:IPI00230192.5|SWISS-PROT:P18872-1|TREMBL:Q543S2|ENSEMBL:ENSMUSP00000034198;ENSMUSP00000114144|REFSEQ:NP_034438|VEGA:OTTMUSP00000046457;OTTMUSP00000046458 Tax_Id=10090 Gene_Symbol=Gnao1 Isoform Alpha-1 of Guanine nucleotide-binding protein G(o) subunit
NaN	2.45507	2.46378	4.03877	NaN	NaN	2.38385	4.99251	2.67996	3.27579	2.80057	2.50652	1.14508	1.20257	1.87136	2.00469	NaN	6.83901	2.40743	4.65528	4.64382	3.16556	5.52303	NaN	157	0.0102358	2	11;8	11	1	Psd3	PH and SEC7 domain-containing protein 3 isoform 3	IPI00881789;IPI00761957	IPI00881789;IPI00761957	E9PUC5	>IPI:IPI00881789.1|ENSEMBL:ENSMUSP00000112545|REFSEQ:NP_081902|VEGA:OTTMUSP00000036410 Tax_Id=10090 Gene_Symbol=Psd3 PH and SEC7 domain-containing protein 3 isoform 3;>IPI:IPI00761957.1|TREMBL:Q8C0E9|ENSEMBL:ENSMUSP00000060306|VEGA:OTTMUSP00000036411 Tax_I
22.4623	8.77039	9.74469	5.08673	6.6921	3.88908	10.8103	3.24507	13.7659	14.1689	16.7695	35.7948	3.16857	4.58968	5.69606	5.87924	3.42783	14.1585	9.0269	6.37837	4.78011	4.10897	4.98157	1.43441	158	0.00409062	2	6;2	6	1	Syp	Syp protein	IPI00756139	IPI00756139;IPI00775883	A4FUR8	>IPI:IPI00756139.1|TREMBL:A4FUR8|ENSEMBL:ENSMUSP00000033484;ENSMUSP00000112336 Tax_Id=10090 Gene_Symbol=Syp Syp protein
0.146987	0.208538	0.133117	0.220022	0.130823	0.140485	0.0976277	0.0826515	0.235538	0.268104	0.161964	0.286944	0.10985	0.165752	0.107881	0.166226	0.233454	0.753352	0.138691	0.323196	0.127049	0.15799	0.0779849	0.120852	159	0.00766981	1	20	20	20	Mcm6	DNA replication licensing factor MCM6	IPI00123881	IPI00123881	P97311	>IPI:IPI00123881.1|SWISS-PROT:P97311|TREMBL:Q3UC10;Q3ULG5;Q542I2;Q8C5L1|ENSEMBL:ENSMUSP00000027601|REFSEQ:NP_032593 Tax_Id=10090 Gene_Symbol=Mcm6 DNA replication licensing factor MCM6
6.96427	6.53125	4.70898	3.48651	6.13949	6.01215	5.25376	4.04793	3.93639	3.82263	3.66973	4.91328	4.58253	5.23917	8.22233	8.09258	4.07764	5.01555	5.30588	7.10126	7.49625	7.80275	8.48536	10.3087	160	0.00759236	1	18	18	18	Ndufa10	NADH dehydrogenase [ubiquinone] 1 alpha subcomplex subunit 10, mitochondrial	IPI00116748	IPI00116748	Q99LC3	>IPI:IPI00116748.1|SWISS-PROT:Q99LC3|ENSEMBL:ENSMUSP00000027478|REFSEQ:NP_077159|VEGA:OTTMUSP00000024348 Tax_Id=10090 Gene_Symbol=Ndufa10 NADH dehydrogenase [ubiquinone] 1 alpha subcomplex subunit 10, mitochondrial
5.36078	1.76697	3.08566	3.46681	4.05927	4.59685	8.52297	5.41301	4.94511	5.53986	6.56901	5.76635	2.20085	2.58725	5.40365	4.45434	2.60308	5.42888	5.91052	3.57194	9.59049	10.9261	8.7222	6.08162	161	0.00687039	1	15	15	15	Flot1	Flotillin-1	IPI00117181	IPI00117181	O08917	>IPI:IPI00117181.1|SWISS-PROT:O08917|TREMBL:Q3TJS0;Q540I4;Q6Y9S2|ENSEMBL:ENSMUSP00000001569|REFSEQ:NP_032053 Tax_Id=10090 Gene_Symbol=Flot1 Flotillin-1
3.11769	3.83862	4.49378	5.18807	9.18274	5.7607	3.33244	2.33263	NaN	4.44444	NaN	1.96171	2.2777	1.73439	NaN	1.75534	5.54754	3.42759	2.39814	3.89848	10.2896	7.78089	6.49773	4.57854	162	0.0154133	1	15	15	15	Ptprn	Receptor-type tyrosine-protein phosphatase-like N	IPI00313306	IPI00313306	Q60673	>IPI:IPI00313306.5|SWISS-PROT:Q60673|TREMBL:A6MDD2;Q3UTI6;Q5DTQ3;Q64500;Q6NVE2;Q6P3E6;Q925J6;Q925J7;Q99PH5|ENSEMBL:ENSMUSP00000027404|REFSEQ:NP_033011 Tax_Id=10090 Gene_Symbol=Ptprn Receptor-type tyrosine-protein phosphatase-like N
9.45537	7.01656	6.69299	4.60851	1.89279	2.83495	3.94322	3.32557	5.84078	4.25279	5.84488	5.08285	2.55076	4.46468	6.5963	5.02361	4.13856	5.32822	7.15257	10.9543	4.16979	4.73395	10.1999	4.71054	163	0.0294411	1	15	15	15	Tppp	Tubulin polymerization-promoting protein	IPI00119067	IPI00119067	Q7TQD2	>IPI:IPI00119067.3|SWISS-PROT:Q7TQD2|TREMBL:Q3URG1|ENSEMBL:ENSMUSP00000022057|REFSEQ:NP_878259|VEGA:OTTMUSP00000034779 Tax_Id=10090 Gene_Symbol=Tppp Tubulin polymerization-promoting protein
0.241284	0.372745	0.656901	0.550085	0.0171697	0.18595	0.0072759	0.0537346	0.372787	0.262281	0.0973141	0.197332	NaN	0.0735456	0.200136	0.0197029	0.883314	NaN	0.748279	0.394011	0.0287803	0.592382	0.103142	0.112804	164	0.0078825	1	14	14	14	Mcm2	Putative uncharacterized protein	IPI00323820	IPI00323820	P97310	>IPI:IPI00323820.4|SWISS-PROT:P97310|TREMBL:Q3UJN1;Q3UK39|ENSEMBL:ENSMUSP00000061923|REFSEQ:NP_032590 Tax_Id=10090 Gene_Symbol=Mcm2 Putative uncharacterized protein
10.5274	4.04629	5.63857	6.85401	5.17598	3.68514	4.72299	3.23572	2.91239	1.97355	1.83739	2.77778	3.27097	5.90912	7.70179	9.2268	4.44425	2.57136	3.63994	4.30979	10.2541	5.28653	6.79301	4.92975	165	0.00155827	1	13	13	13	Camkv	CaM kinase-like vesicle-associated protein	IPI00122486	IPI00122486	Q3UHL1	>IPI:IPI00122486.3|SWISS-PROT:Q3UHL1|ENSEMBL:ENSMUSP00000040430|REFSEQ:NP_663596 Tax_Id=10090 Gene_Symbol=Camkv CaM kinase-like vesicle-associated protein
0.0626724	0.0540686	0.173082	0.113543	0.0681245	0.0646371	0.0393252	0.0474969	0.100391	0.0548787	0.0926956	0.19223	0.0280584	0.0720098	0.053376	0.0373134	0.0734322	0.0942329	0.0872829	0.111862	0.037165	0.0324055	0.0374658	0.0387402	166	0.00365868	1	14	14	13	Hmgb2	High mobility group protein B2	IPI00462291	IPI00462291	P30681	>IPI:IPI00462291.5|SWISS-PROT:P30681|TREMBL:Q3U566;Q3UAZ7;Q9CT19|ENSEMBL:ENSMUSP00000065940|REFSEQ:NP_032278 Tax_Id=10090 Gene_Symbol=Hmgb2 High mobility group protein B2
17.2473	7.98722	10.52	7.07964	17.8881	13.9954	13.9972	12.388	13.5366	13.4181	9.41088	12.6634	8.91504	11.3964	19.5944	14.4038	9.56389	11.5064	15.5188	9.13242	15.7689	21.3954	22.9779	18.1015	167	0.0351011	1	13	13	13	Pcsk1n	ProSAAS	IPI00135604	IPI00135604	Q9QXV0	>IPI:IPI00135604.5|SWISS-PROT:Q9QXV0|TREMBL:B1AUA4|ENSEMBL:ENSMUSP00000040342|REFSEQ:NP_038920|VEGA:OTTMUSP00000019553 Tax_Id=10090 Gene_Symbol=Pcsk1n ProSAAS
0.232596	0.18904	0.220658	NaN	0.503246	0.175738	0.0909091	0.0859254	0.738989	0.33094	0.140003	0.379838	NaN	0.0267008	0.111549	0.0200353	0.203994	0.131737	0.109976	0.118447	0.0395632	0.128222	0.290968	0.182625	168	0.021798	1	11	11	11	Mcm4	DNA replication licensing factor MCM4	IPI00117016	IPI00117016	P49717	>IPI:IPI00117016.1|SWISS-PROT:P49717|TREMBL:Q3UA65;Q3UXG9;Q542F4;Q5DTS8;Q76NI2;Q8C1Z0;Q921D5;Q9D077|ENSEMBL:ENSMUSP00000023353|REFSEQ:NP_032591 Tax_Id=10090 Gene_Symbol=Mcm4 DNA replication licensing factor MCM4
3.49956	3.86533	3.00039	2.21381	1.87501	1.18514	2.1019	0.904732	2.41377	2.97194	2.13922	1.68856	3.49993	2.66731	3.99696	3.76605	3.45244	1.81732	1.68725	4.28119	3.01286	2.64215	4.27259	2.70563	169	0.00926101	1	8	8	8	Hprt1; Hprt	Hypoxanthine-guanine phosphoribosyltransferase	IPI00284806	IPI00284806	P00493	>IPI:IPI00284806.8|SWISS-PROT:P00493|TREMBL:B1B0W8;Q6TDG6;Q99KF5|ENSEMBL:ENSMUSP00000026723|REFSEQ:NP_038584|VEGA:OTTMUSP00000018945 Tax_Id=10090 Gene_Symbol=Hprt Hypoxanthine-guanine phosphoribosyltransferase
0.057169	0.11586	0.109623	0.088129	0.051435	0.0608309	0.0378058	0.0457603	0.0797067	0.0540686	0.0536567	0.0618888	0.0533817	0.112815	0.0890393	0.185415	0.0687569	0.0405433	0.0683854	0.0695604	0.0324781	0.0391788	0.0322258	0.0709371	170	0.00940729	1	11	11	8	Hist1h1b	Histone H1.5	IPI00230133	IPI00230133	P43276	>IPI:IPI00230133.5|SWISS-PROT:P43276|TREMBL:Q1WWK3;Q5T003|ENSEMBL:ENSMUSP00000079356|REFSEQ:NP_064418|VEGA:OTTMUSP00000000650 Tax_Id=10090 Gene_Symbol=Hist1h1b Histone H1.5
6.58284	6.54151	6.24649	NaN	3.6295	5.02639	2.50601	NaN	NaN	2.87778	2.84803	2.94742	5.31124	6.99056	7.4195	6.77736	5.54262	3.98375	6.00492	5.08776	4.57206	1.11339	3.17541	4.2517	171	0.0101264	1	8	8	8	Anln	Actin-binding protein anillin	IPI00172197	IPI00172197	Q8K298	>IPI:IPI00172197.2|SWISS-PROT:Q8K298|TREMBL:Q05CD5|ENSEMBL:ENSMUSP00000045873|REFSEQ:NP_082666 Tax_Id=10090 Gene_Symbol=Anln Actin-binding protein anillin
8.78812	10.7701	18.1048	13.755	17.5027	23.4445	19.4148	12.3416	17.9144	16.2462	18.577	17.5577	5.18645	5.77434	11.4064	12.4963	18.5329	13.6964	17.481	16.1192	25.8866	17.0885	14.7486	19.9179	172	0.0027846	1	6	6	6	Ndufa8	NADH dehydrogenase [ubiquinone] 1 alpha subcomplex subunit 8	IPI00120984	IPI00120984	Q9DCJ5	>IPI:IPI00120984.5|SWISS-PROT:Q9DCJ5|ENSEMBL:ENSMUSP00000065352|REFSEQ:NP_080979|VEGA:OTTMUSP00000013028 Tax_Id=10090 Gene_Symbol=Ndufa8 NADH dehydrogenase [ubiquinone] 1 alpha subcomplex subunit 8
1.83281	1.49243	1.38953	2.82215	1.278	2.10659	1.62549	1.83993	1.90978	2.498	2.04855	2.09319	0.918611	1.06472	1.51787	1.303	2.70651	2.87629	1.99342	2.85551	1.41451	1.90581	2.10274	1.9206	173	0.00182213	1	5	5	5	Armc1	Armadillo repeat-containing protein 1	IPI00110100	IPI00110100	Q9D7A8	>IPI:IPI00110100.1|SWISS-PROT:Q9D7A8|ENSEMBL:ENSMUSP00000029125|REFSEQ:NP_083116 Tax_Id=10090 Gene_Symbol=Armc1 Armadillo repeat-containing protein 1
4.05992	4.7824	4.49277	5.52059	3.11915	4.14456	5.17759	3.74855	5.52151	5.38474	6.22588	5.50479	0.77991	3.18857	3.49321	3.87627	4.70655	3.93592	6.02954	6.76041	4.83489	8.55213	8.2515	7.08466	174	0.00998892	1	12	12	5	Pak1	Serine/threonine-protein kinase PAK 1	IPI00132993	IPI00132993	O88643	>IPI:IPI00132993.1|SWISS-PROT:O88643|TREMBL:Q9R2B2|ENSEMBL:ENSMUSP00000033040|REFSEQ:NP_035165|VEGA:OTTMUSP00000023295 Tax_Id=10090 Gene_Symbol=Pak1 Serine/threonine-protein kinase PAK 1
9.7078	4.77122	3.50976	4.58674	8.84252	9.4509	7.68463	9.72763	8.21896	5.45256	3.85907	7.59936	1.84458	1.60816	5.6281	2.46822	5.35504	12.1153	14.3614	9.08513	8.99604	5.94248	5.18565	15.7159	175	0.00304882	1	4	4	4	S100b	Protein S100-B	IPI00222557	IPI00222557	P50114	>IPI:IPI00222557.5|SWISS-PROT:P50114|TREMBL:Q3UY00|ENSEMBL:ENSMUSP00000047968|REFSEQ:NP_033141|VEGA:OTTMUSP00000021974 Tax_Id=10090 Gene_Symbol=S100b Protein S100-B
7.08366	6.69882	3.12256	11.2119	5.10673	6.49773	13.7221	5.51268	19.4156	11.1074	9.28505	9.55931	10.3666	38.1258	22.041	11.1371	3.68528	5.17491	4.94096	3.33767	4.91377	12.0064	6.79071	6.02192	176	0.0040475	1	4	4	4	Gpm6a	Neuronal membrane glycoprotein M6-a	IPI00122974	IPI00122974	P35802	>IPI:IPI00122974.1|SWISS-PROT:P35802|TREMBL:Q542P2;Q8R1P3|ENSEMBL:ENSMUSP00000033915|REFSEQ:NP_705809 Tax_Id=10090 Gene_Symbol=Gpm6a Neuronal membrane glycoprotein M6-a
3.46189	4.94756	5.99736	8.35491	NaN	5.49541	6.08235	NaN	3.82966	3.33489	2.25749	NaN	8.74126	6.97885	5.72737	7.03334	6.3008	6.43335	NaN	5.16823	5.71494	5.67408	5.6319	5.10048	177	0.00663242	1	4	4	4	Reep2	Receptor expression-enhancing protein 2	IPI00122032	IPI00122032	Q8VCD6	>IPI:IPI00122032.4|SWISS-PROT:Q8VCD6|TREMBL:C1IE02;Q3TYE9|ENSEMBL:ENSMUSP00000036065|REFSEQ:NP_659114 Tax_Id=10090 Gene_Symbol=Reep2 Receptor expression-enhancing protein 2
4.49055	3.54736	2.0517	2.46081	4.79019	5.775	7.46324	4.39967	5.49843	2.75012	8.55432	4.49843	2.7787	6.74673	8.22233	7.49794	7.37028	5.36654	NaN	5.51086	5.90493	11.3317	10.8366	10.1261	178	0.0150482	1	4	4	4	Ndufb8	NADH dehydrogenase [ubiquinone] 1 beta subcomplex subunit 8, mitochondrial	IPI00387430	IPI00387430	Q9D6J5	>IPI:IPI00387430.1|SWISS-PROT:Q9D6J5|TREMBL:Q3V406|ENSEMBL:ENSMUSP00000026222|REFSEQ:NP_080337 Tax_Id=10090 Gene_Symbol=Ndufb8 NADH dehydrogenase [ubiquinone] 1 beta subcomplex subunit 8, mitochondrial
0.110851	1.43273	0.572148	0.266205	4.37063	6.09644	4.81047	4.72054	5.14245	NaN	4.37675	3.10241	0.113185	4.99052	3.17864	2.4283	0.327815	6.68092	2.5319	0.20774	5.24521	3.36146	4.61702	9.41354	179	0.0266312	1	4	4	4	Jam3	Junctional adhesion molecule C	IPI00453847	IPI00453847	Q9D8B7	>IPI:IPI00453847.2|SWISS-PROT:Q9D8B7|ENSEMBL:ENSMUSP00000034472|REFSEQ:NP_075766 Tax_Id=10090 Gene_Symbol=Jam3 Junctional adhesion molecule C
8.25764	NaN	5.78704	4.76894	5.59472	5.60287	5.6654	7.15666	1.79102	2.47017	1.57136	2.95674	NaN	6.20848	4.66418	6.89275	NaN	2.87877	4.79065	3.15448	4.70478	4.20999	1.99936	6.53467	180	0.00182779	1	5	5	3	Rras2	Ras-related protein R-Ras2	IPI00323822	IPI00323822	P62071	>IPI:IPI00323822.1|SWISS-PROT:P62071|TREMBL:Q9CTF6|ENSEMBL:ENSMUSP00000069752|REFSEQ:NP_080122 Tax_Id=10090 Gene_Symbol=Rras2 Ras-related protein R-Ras2
8.02568	5.30617	11.1248	4.88759	4.46808	4.41092	7.35889	4.7879	8.28157	7.82963	8.86289	8.26514	2.42624	3.78989	6.55265	4.33407	7.12758	4.79249	6.02664	6.41766	8.59697	5.54293	7.80092	6.93577	181	0.0175267	1	16	16	3	Mapre3	Microtubule-associated protein RP/EB family member 3	IPI00343557	IPI00343557	Q6PER3	>IPI:IPI00343557.1|SWISS-PROT:Q6PER3|TREMBL:Q2UZW7|ENSEMBL:ENSMUSP00000031058|REFSEQ:NP_579928|VEGA:OTTMUSP00000025251 Tax_Id=10090 Gene_Symbol=Mapre3 Microtubule-associated protein RP/EB family member 3
NaN	2.40333	4.06388	1.31439	3.36293	2.19804	2.2687	1.30234	3.01187	2.05099	3.33678	4.07781	1.03081	1.55848	2.60688	1.57921	3.77772	2.3809	7.68226	6.65026	2.45821	2.76365	3.06871	2.88534	182	0.0310367	1	3	3	3	Lxn	Latexin	IPI00331745	IPI00331745	P70202	>IPI:IPI00331745.2|SWISS-PROT:P70202|TREMBL:Q14BZ3|ENSEMBL:ENSMUSP00000060732|REFSEQ:NP_058033|VEGA:OTTMUSP00000037051 Tax_Id=10090 Gene_Symbol=Lxn Latexin
2.5312	NaN	2.87704	NaN	10.0566	9.44822	13.7589	NaN	NaN	7.89952	9.08183	8.91186	NaN	1.80242	NaN	7.25479	NaN	8.64155	5.28234	1.94133	7.98085	7.62893	NaN	10.9389	183	0.046619	1	3	3	3	Mtnd1; mt-Nd1; Nd1	NADH-ubiquinone oxidoreductase chain 1	IPI00341550	IPI00341550	P03888	>IPI:IPI00341550.1|SWISS-PROT:P03888|TREMBL:Q35033;Q35034;Q3TNL9;Q4JFN6;Q8C1H5|ENSEMBL:ENSMUSP00000080991|REFSEQ:NP_904328 Tax_Id=10090 Gene_Symbol=mt-Nd1 NADH-ubiquinone oxidoreductase chain 1
NaN	NaN	3.72439	3.52995	2.64746	NaN	2.76358	NaN	NaN	2.46938	NaN	NaN	2.26598	1.387	1.59673	1.418	3.31378	4.14594	NaN	3.4132	6.03755	NaN	2.5705	NaN	184	0.0140087	1	2	2	2	Mdp1	Magnesium-dependent phosphatase 1	IPI00112138	IPI00112138	Q9D967	>IPI:IPI00112138.1|SWISS-PROT:Q9D967|ENSEMBL:ENSMUSP00000002400|REFSEQ:NP_075886 Tax_Id=10090 Gene_Symbol=Mdp1 Magnesium-dependent phosphatase 1
4.40606	3.29131	3.58423	2.70226	2.60518	1.70564	4.16823	1.84819	3.38512	4.1154	4.39387	2.21469	2.67695	3.19203	2.81952	2.47985	3.56786	2.58552	3.49016	4.37503	4.79318	3.85802	6.17894	5.15092	185	0.0217707	1	25	25	2	Nfasc	Neurofascin	IPI00329927	IPI00329927	Q810U3	>IPI:IPI00329927.4|SWISS-PROT:Q810U3|TREMBL:Q6P6Q1|ENSEMBL:ENSMUSP00000092148|REFSEQ:NP_874385 Tax_Id=10090 Gene_Symbol=Nfasc Neurofascin
1.22182	NaN	NaN	NaN	6.17818	NaN	5.0005	NaN	1.47022	2.68759	2.42301	2.16708	NaN	NaN	NaN	NaN	3.41355	NaN	NaN	NaN	3.09215	0.83956	2.19978	1.81551	186	0.0365158	3	9;9;5	9	9	Selenbp2; Lpsb2	Selenium-binding protein 2	IPI00323816;IPI00623845;IPI00880282	IPI00323816;IPI00623845;IPI00880282	Q63836	>IPI:IPI00323816.5|SWISS-PROT:Q63836|ENSEMBL:ENSMUSP00000088358|REFSEQ:NP_062287|VEGA:OTTMUSP00000021103 Tax_Id=10090 Gene_Symbol=Selenbp2 Selenium-binding protein 2;>IPI:IPI00623845.3|SWISS-PROT:P17563|ENSEMBL:ENSMUSP00000088349;ENSMUSP00000112012|REFSEQ:
NaN	2.75505	1.34028	1.39443	5.99664	4.11506	7.11744	5.54355	NaN	NaN	NaN	NaN	2.02233	5.84864	NaN	3.77915	2.61056	NaN	NaN	2.03695	NaN	8.02762	7.3244	5.63444	187	0.00262515	7	9;9;9;9;8;1;1	9	8	Dync1i1	Putative uncharacterized protein Dync1i1	IPI00857969;IPI00131084;IPI00226946;IPI00857248;IPI00856794	IPI00857969;IPI00131084;IPI00226946;IPI00857248;IPI00856794;IPI00856922;IPI00968915	D3Z0M6;D6Q0F3	>IPI:IPI00857969.1|TREMBL:D3Z0M6;D6Q0F3|ENSEMBL:ENSMUSP00000111217|VEGA:OTTMUSP00000027676 Tax_Id=10090 Gene_Symbol=Dync1i1 Putative uncharacterized protein Dync1i1;>IPI:IPI00131084.3|SWISS-PROT:O88485-1 Tax_Id=10090 Gene_Symbol=Dync1i1 Isoform 1A of Cytop
0.144484	NaN	NaN	NaN	NaN	NaN	NaN	NaN	NaN	NaN	0.272569	0.231011	0.427972	0.211175	0.120528	0.517974	0.448511	NaN	NaN	0.314961	NaN	0.0845595	0.102941	0.0847673	188	0.0352519	3	6;6;4	6	6	P4ha1	Putative uncharacterized protein	IPI00272381;IPI00399959;IPI00652514	IPI00272381;IPI00399959;IPI00652514	Q60715-1	>IPI:IPI00272381.5|SWISS-PROT:Q60715-1|TREMBL:Q3TN84;Q3UF16|ENSEMBL:ENSMUSP00000009789|REFSEQ:NP_035160|VEGA:OTTMUSP00000046787 Tax_Id=10090 Gene_Symbol=P4ha1 Putative uncharacterized protein;>IPI:IPI00399959.1|SWISS-PROT:Q60715-2|ENSEMBL:ENSMUSP0000010110
0.823588	1.04797	1.88296	NaN	NaN	NaN	NaN	4.10931	1.36489	3.02783	1.91806	2.22816	9.33358	NaN	4.46209	6.32711	7.1664	6.08494	3.71361	1.79073	NaN	NaN	NaN	NaN	189	0.00453038	8	5;5;4;4;4;4;4;1	5	5	Itsn1	195 kDa protein	IPI00831223;IPI00129356;IPI00831310;IPI00222409;IPI00462032;IPI00831017;IPI00831697	IPI00831223;IPI00129356;IPI00831310;IPI00222409;IPI00462032;IPI00831017;IPI00831697;IPI00463606	E9Q0N0;E9Q3I5;Q8CGU5	>IPI:IPI00831223.1|ENSEMBL:ENSMUSP00000066361|VEGA:OTTMUSP00000023658 Tax_Id=10090 Gene_Symbol=Itsn1 195 kDa protein;>IPI:IPI00129356.1|SWISS-PROT:Q9Z0R4-1|TREMBL:Q6J1F0;Q8C4B5|ENSEMBL:ENSMUSP00000109635;ENSMUSP00000112274|REFSEQ:NP_034717|VEGA:OTTMUSP0000
0.205082	NaN	NaN	NaN	NaN	NaN	NaN	NaN	0.272428	0.972952	1.31756	1.03862	0.716435	NaN	0.234351	0.15935	NaN	NaN	0.662778	0.784806	1.76619	1.58476	3.13568	1.82675	190	0.0141145	3	5;5;1	5	5	Nop14	Nucleolar protein 14	IPI00353010;IPI00785218	IPI00353010;IPI00785218;IPI00969349	Q8R3N1	>IPI:IPI00353010.1|SWISS-PROT:Q8R3N1 Tax_Id=10090 Gene_Symbol=Nop14 Nucleolar protein 14;>IPI:IPI00785218.2|TREMBL:Q3TSX5;Q5RL78;Q9CSY8|ENSEMBL:ENSMUSP00000038382|REFSEQ:NP_083554|VEGA:OTTMUSP00000026857 Tax_Id=10090 Gene_Symbol=Nop14 nucleolar protein 14
1.29611	1.22121	2.24512	3.36621	NaN	2.4825	NaN	NaN	NaN	NaN	NaN	NaN	0.274816	0.211986	0.19445	0.266404	1.78568	NaN	0.322456	2.65633	NaN	NaN	NaN	NaN	191	0.0047401	4	5;2;2;2	5	5	Sec61a1	Protein transport protein Sec61 subunit alpha isoform 1	IPI00226882	IPI00226882;IPI00227631;IPI00761406;IPI00111585	P61620	>IPI:IPI00226882.7|SWISS-PROT:P61620|TREMBL:Q3TJD0|ENSEMBL:ENSMUSP00000032168|REFSEQ:NP_058602|VEGA:OTTMUSP00000026742 Tax_Id=10090 Gene_Symbol=Sec61a1 Protein transport protein Sec61 subunit alpha isoform 1
NaN	NaN	NaN	NaN	1.08446	1.56517	1.16837	NaN	1.3956	1.21137	NaN	NaN	0.332038	0.158647	NaN	0.181977	NaN	1.45452	NaN	NaN	0.341227	0.32789	1.23305	NaN	192	0.00760214	5	4;4;4;4;3	4	4	Gemin5	gem-associated protein 5 isoform 1	IPI00953772;IPI00226397;IPI00649659;IPI00954312;IPI00649872	IPI00953772;IPI00226397;IPI00649659;IPI00954312;IPI00649872	Q8BX17	>IPI:IPI00953772.2|SWISS-PROT:Q8BX17|TREMBL:B2RQ83;B7ZN04;Q3TR97|REFSEQ:NP_001160141 Tax_Id=10090 Gene_Symbol=Gemin5 gem-associated protein 5 isoform 1;>IPI:IPI00226397.3|TREMBL:Q3UPH2|ENSEMBL:ENSMUSP00000036603|REFSEQ:NP_766146|VEGA:OTTMUSP00000005897 Tax
NaN	NaN	2.03641	1.16102	1.14492	NaN	0.808277	3.38032	NaN	NaN	NaN	NaN	3.59208	3.29717	8.88652	6.0507	3.52808	NaN	1.76053	3.10646	1.42861	NaN	0.996512	NaN	193	0.0324138	4	3;3;3;3	3	3	Gyk;Gk	Isoform 3 of Glycerol kinase	IPI00404687;IPI00224993;IPI00654090;IPI00135446	IPI00404687;IPI00224993;IPI00654090;IPI00135446	Q64516-3	>IPI:IPI00404687.5|SWISS-PROT:Q64516-3|ENSEMBL:ENSMUSP00000109611|VEGA:OTTMUSP00000019465 Tax_Id=10090 Gene_Symbol=Gyk Isoform 3 of Glycerol kinase;>IPI:IPI00224993.4|SWISS-PROT:Q64516-2|TREMBL:Q3TEN9|ENSEMBL:ENSMUSP00000119564|REFSEQ:NP_997609|VEGA:OTTMUS
1.98874	3.27611	2.84406	2.41709	0.447347	0.531265	0.692425	NaN	0.68956	NaN	NaN	NaN	1.87737	3.00851	1.68945	2.01463	3.6511	0.605914	1.61314	3.1508	NaN	NaN	NaN	NaN	194	0.00633466	3	4;4;1	4	3	Srgap2	124 kDa protein	IPI00652316;IPI00676293	IPI00652316;IPI00676293;IPI00653529	Q91Z67	>IPI:IPI00652316.4|ENSEMBL:ENSMUSP00000032395 Tax_Id=10090 Gene_Symbol=Srgap2 124 kDa protein;>IPI:IPI00676293.3|SWISS-PROT:Q91Z67|ENSEMBL:ENSMUSP00000095195|REFSEQ:NP_001074480 Tax_Id=10090 Gene_Symbol=Srgap2 SLIT-ROBO Rho GTPase-activating protein 2
5.37374	2.18412	1.2643	1.7609	NaN	NaN	NaN	NaN	NaN	NaN	6.75721	NaN	2.16324	1.12091	1.99637	3.31235	NaN	NaN	5.02235	NaN	7.99041	9.54198	NaN	5.99305	195	0.0130034	2	5;4	5	3	1110049F12Rik;Pithd1; Trp26	Isoform 1 of UPF0424 protein C1orf128 homolog	IPI00845712;IPI00309077	IPI00845712;IPI00309077	Q8BWR2-1	>IPI:IPI00845712.1|SWISS-PROT:Q8BWR2-1|ENSEMBL:ENSMUSP00000101477|REFSEQ:NP_079687|VEGA:OTTMUSP00000010408 Tax_Id=10090 Gene_Symbol=1110049F12Rik Isoform 1 of UPF0424 protein C1orf128 homolog;>IPI:IPI00309077.4|SWISS-PROT:Q8BWR2-2|ENSEMBL:ENSMUSP0000003042
1.94039	NaN	2.7199	NaN	3.5957	1.35564	NaN	NaN	1.63647	NaN	NaN	1.21825	NaN	4.61787	5.04566	4.61233	NaN	NaN	NaN	NaN	5.65163	3.32513	3.55846	NaN	196	0.0248955	2	3;3	3	3	Rab23	Ras-related protein Rab-23	IPI00116734;IPI00621963	IPI00116734;IPI00621963	P35288	>IPI:IPI00116734.3|SWISS-PROT:P35288|TREMBL:Q0PD32 Tax_Id=10090 Gene_Symbol=Rab23 Ras-related protein Rab-23;>IPI:IPI00621963.2|TREMBL:Q9D4I9|ENSEMBL:ENSMUSP00000085625;ENSMUSP00000110828|REFSEQ:NP_001153201;NP_033025|VEGA:OTTMUSP00000024509;OTTMUSP0000002
1.49185	NaN	NaN	0.984155	1.90883	2.9244	NaN	NaN	NaN	NaN	NaN	NaN	3.31422	2.92389	2.7603	3.1406	3.03757	2.73321	NaN	2.52621	3.74476	2.60539	2.57327	NaN	197	0.00259147	1	6	6	6	Nit2	Omega-amidase NIT2	IPI00119945	IPI00119945	Q9JHW2	>IPI:IPI00119945.1|SWISS-PROT:Q9JHW2|ENSEMBL:ENSMUSP00000023432|REFSEQ:NP_075664 Tax_Id=10090 Gene_Symbol=Nit2 Omega-amidase NIT2
NaN	NaN	NaN	NaN	1.07369	0.657549	1.27825	1.28302	4.37541	NaN	3.641	3.56761	0.705766	0.268075	0.290048	0.341997	NaN	1.29858	0.496204	0.369768	2.97841	0.464965	0.468274	3.85401	198	0.00651311	1	3	3	3	Adnp	activity-depend	IPI00672180	IPI00672180	Q9Z103	>IPI:IPI00672180.1|SWISS-PROT:Q9Z103|TREMBL:A2BDX0;Q3UYC8;Q5BL11;Q5RKY4;Q6ZQ47;Q8BNY2|ENSEMBL:ENSMUSP00000056809;ENSMUSP00000085316;ENSMUSP00000104819|REFSEQ:NP_033758|VEGA:OTTMUSP00000017175;OTTMUSP00000017176 Tax_Id=10090 Gene_Symbol=Adnp activity-depend
0.144492	0.245773	0.401075	0.334404	0.449499	0.850051	0.457059	NaN	NaN	NaN	NaN	NaN	0.353008	0.111079	0.0670736	0.216582	NaN	NaN	NaN	NaN	NaN	0.162406	NaN	NaN	199	0.0467492	1	3	3	3	Ctcf	Transcriptional repressor CTCF	IPI00320741	IPI00320741	Q61164	>IPI:IPI00320741.1|SWISS-PROT:Q61164|TREMBL:Q05CK6;Q3USR8;Q3UYZ8;Q3UZH8|ENSEMBL:ENSMUSP00000005841|REFSEQ:NP_851839|VEGA:OTTMUSP00000018870 Tax_Id=10090 Gene_Symbol=Ctcf Transcriptional repressor CTCF
2.4226	0.865052	1.53125	4.57394	NaN	NaN	NaN	NaN	3.77729	2.01837	NaN	NaN	6.00276	5.55062	5.26039	5.75175	1.88313	NaN	NaN	NaN	0.397757	0.365658	3.02884	NaN	200	0.0318018	1	2	2	2	Cox7a2	Cytochrome c oxidase subunit 7A2, mitochondrial	IPI00114377	IPI00114377	P48771	>IPI:IPI00114377.1|SWISS-PROT:P48771|ENSEMBL:ENSMUSP00000034881|REFSEQ:NP_034075 Tax_Id=10090 Gene_Symbol=Cox7a2 Cytochrome c oxidase subunit 7A2, mitochondrial
3.51383	3.91405	2.80907	2.06522	3.17844	4.39483	4.04825	3.90518	2.87447	1.48708	1.6021	2.18041	4.71498	2.2168	5.84419	4.90244	4.20097	3.06129	4.73127	2.26788	3.36089	4.56538	3.63412	4.20911	201	0.0180647	5	6;3;3;2;2	6	6	Cryz	Quinone oxidoreductase	IPI00134704;IPI00857132;IPI00857341	IPI00134704;IPI00857132;IPI00857341;IPI00857537;IPI00857469	P47199	>IPI:IPI00134704.1|SWISS-PROT:P47199|TREMBL:Q3UYY0;Q80XR3|ENSEMBL:ENSMUSP00000029850|REFSEQ:NP_034098|VEGA:OTTMUSP00000026037 Tax_Id=10090 Gene_Symbol=Cryz Quinone oxidoreductase;>IPI:IPI00857132.2|TREMBL:D3YUG9|ENSEMBL:ENSMUSP00000118449|VEGA:OTTMUSP00000
0.176252	0.172384	NaN	NaN	NaN	0.151249	0.118604	0.209074	0.302755	0.285404	NaN	0.361939	0.113696	0.243843	0.194492	0.204491	0.192293	0.162578	NaN	0.32774	0.137325	0.134844	0.135846	0.150487	202	0.0144965	4	4;4;4;2	4	4	Dnajc2	DnaJ homolog subfamily C member 2	IPI00126317;IPI00856664;IPI00856574;IPI00856831	IPI00126317;IPI00856664;IPI00856574;IPI00856831	P54103	>IPI:IPI00126317.1|SWISS-PROT:P54103|ENSEMBL:ENSMUSP00000030771|REFSEQ:NP_033610|VEGA:OTTMUSP00000031226 Tax_Id=10090 Gene_Symbol=Dnajc2 DnaJ homolog subfamily C member 2;>IPI:IPI00856664.1|TREMBL:Q3TE39;Q3TTG9;Q3UVT4|ENSEMBL:ENSMUSP00000110847|VEGA:OTTMUS
0.105453	0.0816526	0.0561987	0.147745	0.0632151	0.0781922	0.0511248	0.0486855	0.115435	0.100731	0.11099	0.116907	0.0574647	0.0527788	0.0764117	0.0737735	0.105678	0.0416008	0.114614	0.0757404	0.0472121	0.0478172	0.0626057	0.0528067	203	0.0124601	3	21;1;1	22	4	Gag		IPI00675491	IPI00675491;IPI00849740;IPI00554897	Q61213	>IPI:IPI00675491.2|TREMBL:Q61213 Tax_Id=10090 Gene_Symbol=- Gag
8.88415	5.94036	4.60003	5.18376	8.97746	10.1678	8.20748	5	5.35046	5.92242	4.17589	6.16143	3.14485	5.82716	8.48393	4.71165	3.59919	5.96196	8.32432	6.80457	11.1225	9.95124	12.8751	13.3243	204	0.00855359	2	33;13	33	30	Hspa12a	Heat shock 70 kDa protein 12A	IPI00279443	IPI00279443;IPI00652109	Q8K0U4	>IPI:IPI00279443.1|SWISS-PROT:Q8K0U4|ENSEMBL:ENSMUSP00000066860|REFSEQ:NP_780408 Tax_Id=10090 Gene_Symbol=Hspa12a Heat shock 70 kDa protein 12A
2.42665	3.97962	4.16077	2.23224	4.7515	8.21558	6.825	8.13207	4.60108	4.24502	3.0447	5.06586	6.3743	4.03323	5.02917	5.67601	3.38753	6.41026	5.81835	3.30262	3.40252	3.70672	3.68161	5.33732	205	0.0115347	6	8;7;1;1;1;1	8	3	Acot2	Acyl-coenzyme A thioesterase 2, mitochondrial	IPI00136683;IPI00653566	IPI00136683;IPI00653566;IPI00130369;IPI00406375;IPI00467177;IPI00867749	Q9QYR9	>IPI:IPI00136683.1|SWISS-PROT:Q9QYR9 Tax_Id=10090 Gene_Symbol=Acot2 Acyl-coenzyme A thioesterase 2, mitochondrial;>IPI:IPI00653566.1|TREMBL:Q3T9C9;Q6P2K2|ENSEMBL:ENSMUSP00000021649|REFSEQ:NP_598949|VEGA:OTTMUSP00000034503 Tax_Id=10090 Gene_Symbol=Acot2 acy
1.68845	0.944555	1.17352	NaN	NaN	1.11246	NaN	NaN	3.08756	3.48311	NaN	2.78358	NaN	0.536797	NaN	0.952562	3.43218	1.37535	NaN	4.50491	3.27054	NaN	2.12725	4.75444	206	0.00847616	5	7;7;7;7;6	7	2	Myo6	MKIAA0389 protein	IPI00462752;IPI00776145;IPI00623496;IPI00776187;IPI00762700	IPI00462752;IPI00776145;IPI00623496;IPI00776187;IPI00762700	Q6A077	>IPI:IPI00462752.4|TREMBL:Q6A077|ENSEMBL:ENSMUSP00000108884;ENSMUSP00000108893|VEGA:OTTMUSP00000019173 Tax_Id=10090 Gene_Symbol=Myo6 MKIAA0389 protein;>IPI:IPI00776145.1|ENSEMBL:ENSMUSP00000075501|VEGA:OTTMUSP00000019174 Tax_Id=10090 Gene_Symbol=Myo6 146 k
8.21355	6.46371	4.60108	4.13736	6.45911	9.61353	7.67166	5.36394	5.54539	5.22876	5.17679	7.77001	2.31933	2.87737	5.68893	6.21736	6.22007	7.28916	6.64982	4.93608	7.20409	8.15129	8.66251	8.87784	207	0.0318765	3	18;10;4	18	18	Slc25a11	Mitochondrial 2-oxoglutarate/malate carrier protein	IPI00230754;IPI00648357	IPI00230754;IPI00648357;IPI00648119	Q9CR62	>IPI:IPI00230754.5|SWISS-PROT:Q9CR62|TREMBL:Q5SX53;Q9CTC7|ENSEMBL:ENSMUSP00000014750|REFSEQ:NP_077173|VEGA:OTTMUSP00000006344;OTTMUSP00000021234 Tax_Id=10090 Gene_Symbol=Slc25a11 Mitochondrial 2-oxoglutarate/malate carrier protein;>IPI:IPI00648357.1|TREMBL
1.60661	1.48646	1.7133	2.10252	2.01967	3.12383	1.18835	2.26378	1.01475	1.82939	1.52975	3.15796	1.9857	1.26933	5.12321	2.14243	2.353	0.792393	1.77302	2.32715	2.41686	7.66871	8.18465	4.37484	208	0.0285931	2	12;12	12	12	Aldh7a1	Isoform 1 of Alpha-aminoadipic semialdehyde dehydrogenase	IPI00230084;IPI00890092	IPI00230084;IPI00890092	Q9DBF1-1	>IPI:IPI00230084.5|SWISS-PROT:Q9DBF1-1|ENSEMBL:ENSMUSP00000112334|REFSEQ:NP_613066 Tax_Id=10090 Gene_Symbol=Aldh7a1 Isoform 1 of Alpha-aminoadipic semialdehyde dehydrogenase;>IPI:IPI00890092.1|SWISS-PROT:Q9DBF1-2|ENSEMBL:ENSMUSP00000065089|REFSEQ:NP_001120
0.736052	1.37105	1.22175	1.56683	1.08591	3.1346	1.09319	2.68392	1.72903	3.49748	3.04405	1.9489	1.8815	1.43655	1.11268	1.1447	1.29242	1.33046	0.86103	1.21899	1.68529	0.982511	0.845594	0.899038	209	0.0282509	2	14;5	14	11	Tagln3	Transgelin-3	IPI00128986	IPI00128986;IPI00458794	Q9R1Q8	>IPI:IPI00128986.1|SWISS-PROT:Q9R1Q8|TREMBL:Q9D6K2|ENSEMBL:ENSMUSP00000093762|REFSEQ:NP_062728|VEGA:OTTMUSP00000033266 Tax_Id=10090 Gene_Symbol=Tagln3 Transgelin-3
3.92234	2.95858	2.91962	3.61664	3.7435	3.96024	4.86121	3.28332	2.62522	1.85268	2.64487	5.24411	3.0722	4.23729	6.73718	4.67727	3.39351	2.47029	3.50705	3.66905	6.19924	6.29485	7.97385	4.70079	210	0.00833491	1	17	19	17	Amph	Amphiphysin	IPI00400180	IPI00400180	Q7TQF7	>IPI:IPI00400180.1|SWISS-PROT:Q7TQF7|TREMBL:Q80YA2;Q8BXH2|ENSEMBL:ENSMUSP00000003345|REFSEQ:NP_778172 Tax_Id=10090 Gene_Symbol=Amph Amphiphysin
0.192875	0.351617	0.42107	0.413462	0.189645	0.250501	0.181812	0.246585	0.17854	NaN	0.13194	0.198232	0.385907	0.326488	0.189595	0.261301	0.287687	0.275149	0.289042	0.260505	0.180028	0.233541	NaN	0.203434	211	0.0169117	1	5	5	5	Nup133	Nuclear pore complex protein Nup133	IPI00320303	IPI00320303	Q8R0G9	>IPI:IPI00320303.1|SWISS-PROT:Q8R0G9|TREMBL:Q8CDZ5|ENSEMBL:ENSMUSP00000048084|REFSEQ:NP_758492 Tax_Id=10090 Gene_Symbol=Nup133 Nuclear pore complex protein Nup133
6.44496	3.31598	4.92199	4.77692	5.12873	2.20527	5.06303	3.66273	6.06391	6.44122	5.41008	6.6921	7.53296	6.53467	10.0538	4.73104	3.31928	1.84816	5.30223	3.46705	9.83477	6.3593	10.5751	3.85773	212	0.0233497	1	8	12	5	Sncb	Beta-synuclein	IPI00131614	IPI00131614	Q91ZZ3	>IPI:IPI00131614.1|SWISS-PROT:Q91ZZ3|ENSEMBL:ENSMUSP00000043074;ENSMUSP00000116296|REFSEQ:NP_291088|VEGA:OTTMUSP00000043434;OTTMUSP00000043435 Tax_Id=10090 Gene_Symbol=Sncb Beta-synuclein
4.40451	5.11326	4.85814	6.42797	2.12382	1.96792	3.02288	5.57258	3.85728	4.35313	3.69413	4.32788	7.94029	6.4222	5.53955	8.09585	5.43833	4.63671	4.88353	6.13459	5.05638	4.29019	5.79676	4.39136	213	0.00151939	1	4	4	4	Isoc2a;Isoc2a; Isoc2	Isochorismatase domain-containing protein 2A, mitochondrial	IPI00757372	IPI00757372	P85094	>IPI:IPI00757372.2|SWISS-PROT:P85094|TREMBL:B2RY90|REFSEQ:NP_001095068 Tax_Id=10090 Gene_Symbol=Isoc2a Isochorismatase domain-containing protein 2A, mitochondrial
6.0687	4.18445	3.44471	6.10202	6.46329	8.12942	5.80181	2.67201	4.40898	3.88048	4.04334	4.21567	2.01183	3.37861	5.64494	3.707	6.09162	4.44366	7.00182	6.4771	8.1666	8.32639	8.71611	8.46812	214	0.010017	1	13	13	1	Ndrg2	Isoform 2 of Protein NDRG2	IPI00759847	IPI00759847	Q9QYG0-2	>IPI:IPI00759847.1|SWISS-PROT:Q9QYG0-2|TREMBL:Q9CTJ5|ENSEMBL:ENSMUSP00000107259|REFSEQ:NP_001139431 Tax_Id=10090 Gene_Symbol=Ndrg2 Isoform 2 of Protein NDRG2
5.6993	4.73127	3.62516	4.72389	9.67492	10.4394	9.05387	4.55581	8.23045	5.51694	6.79163	3.74153	2.09639	5.76868	3.13205	6.31871	6.04631	5.62651	6.19425	6.37593	8.38364	10.576	9.23702	7.97575	215	0.0122695	1	11	11	1	Cltb	Isoform 1 of Clathrin light chain B	IPI00228978	IPI00228978	Q6IRU5-1	>IPI:IPI00228978.2|SWISS-PROT:Q6IRU5-1|ENSEMBL:ENSMUSP00000053371|VEGA:OTTMUSP00000043471 Tax_Id=10090 Gene_Symbol=Cltb Isoform 1 of Clathrin light chain B
1.99661	0.112766	1.61569	0.99552	0.373916	4.27679	2.19539	1.52156	2.61814	1.9286	2.7268	1.77759	0.157495	1.38059	0.067245	0.501404	1.53957	2.06352	0.955019	1.00179	2.22178	1.72583	5.96516	3.61703	216	0.0267352	1	4	8	1	Opcml	38 kDa protein	IPI00857911	IPI00857911	G5E8G3	>IPI:IPI00857911.1|ENSEMBL:ENSMUSP00000073493|VEGA:OTTMUSP00000028915 Tax_Id=10090 Gene_Symbol=Opcml 38 kDa protein
8.60363	4.87472	4.41618	4.34028	7.64935	5.3217	7.06614	4.38135	6.29168	6.36132	6.38284	6.98812	2.76679	4.25949	5.57196	5.80147	4.71965	5.0984	6.2162	5.148	8.17127	8.63334	9.12658	7.03433	217	0.0242661	13	92;91;90;21;21;21;21;20;20;17;17;4;4	92	92	Map2; Mtap2	Putative uncharacterized protein	IPI00894724;IPI00895965;IPI00118075	IPI00894724;IPI00895965;IPI00118075;IPI00404011;IPI00895309;IPI00673708;IPI00895260;IPI00653404;IPI00895463;IPI00885234;IPI00894590;IPI00831444;IPI00895530	Q3URJ7	>IPI:IPI00894724.1|TREMBL:Q3URJ7|ENSEMBL:ENSMUSP00000024639;ENSMUSP00000109646|VEGA:OTTMUSP00000017690 Tax_Id=10090 Gene_Symbol=Mtap2 Putative uncharacterized protein;>IPI:IPI00895965.1|TREMBL:B2KGT6|VEGA:OTTMUSP00000042714 Tax_Id=10090 Gene_Symbol=Mtap2 M
3.40148	3.50152	3.59596	3.06626	2.01605	2.33945	2.61684	0.961446	2.2481	2.42577	2.60831	2.21479	5.31039	3.57679	2.68839	3.09645	2.93281	2.5444	2.63269	3.69413	2.39929	2.89931	3.63517	2.61595	218	0.0150759	2	9;9	9	9	Ube2o	Ubiquitin-conjugating enzyme E2 O	IPI00453803;IPI00875550	IPI00453803;IPI00875550	Q6ZPJ3	>IPI:IPI00453803.5|SWISS-PROT:Q6ZPJ3 Tax_Id=10090 Gene_Symbol=Ube2o Ubiquitin-conjugating enzyme E2 O;>IPI:IPI00875550.1|TREMBL:A2A7X3|ENSEMBL:ENSMUSP00000080791|REFSEQ:NP_776116|VEGA:OTTMUSP00000004211 Tax_Id=10090 Gene_Symbol=Ube2o ubiquitin-conjugating
0.357999	0.620309	0.674082	0.800448	0.457666	0.566765	0.479916	0.536366	0.448049	0.596694	0.492247	0.441716	0.964599	0.780396	0.619464	0.723327	0.688942	0.557911	0.710328	0.520888	0.435464	0.354623	0.551663	0.445276	219	0.0161651	3	9;8;6	9	9	Prpf19	Isoform 1 of Pre-mRNA-processing factor 19	IPI00480507;IPI00222760;IPI00480440	IPI00480507;IPI00222760;IPI00480440	Q99KP6-1	>IPI:IPI00480507.1|SWISS-PROT:Q99KP6-1|REFSEQ:NP_598890 Tax_Id=10090 Gene_Symbol=Prpf19 Isoform 1 of Pre-mRNA-processing factor 19;>IPI:IPI00222760.1|SWISS-PROT:Q99KP6-2|TREMBL:Q4ADG5|ENSEMBL:ENSMUSP00000025642 Tax_Id=10090 Gene_Symbol=Prpf19 Isoform 2 of
8.24606	6.70062	7.67283	5.71527	5.54047	5.56204	4.27643	3.7219	8.63558	7.63417	5.95309	8.02697	7.05916	3.88833	6.0931	4.02269	5.43154	5.07691	6.64673	3.61154	6.91515	7.91202	7.04076	8.24946	220	0.00760934	5	12;9;9;5;3	12	9	Slc25a22	Mitochondrial glutamate carrier 1	IPI00109275;IPI00754329;IPI00754831	IPI00109275;IPI00754329;IPI00754831;IPI00756073;IPI00856458	Q9D6M3	>IPI:IPI00109275.1|SWISS-PROT:Q9D6M3|ENSEMBL:ENSMUSP00000019226;ENSMUSP00000101629|REFSEQ:NP_001171047;NP_080922|VEGA:OTTMUSP00000017791;OTTMUSP00000017792 Tax_Id=10090 Gene_Symbol=Slc25a22 Mitochondrial glutamate carrier 1;>IPI:IPI00754329.2|ENSEMBL:ENSMU
0.16619	0.298454	0.278172	0.373106	0.247011	0.222638	0.230388	0.33521	0.398947	0.330568	0.349724	0.714694	0.445653	0.22024	0.185656	0.175559	0.249489	0.318279	0.189735	0.192274	0.19524	0.151062	0.217108	0.250652	221	0.0468826	3	8;7;7	8	8	Rps5	40S ribosomal protein S5	IPI00944141;IPI00125521;IPI00857345	IPI00944141;IPI00125521;IPI00857345	Q91V55	>IPI:IPI00944141.1|TREMBL:Q91V55|ENSEMBL:ENSMUSP00000004554;ENSMUSP00000104179|REFSEQ:NP_033121|VEGA:OTTMUSP00000026965;OTTMUSP00000026966 Tax_Id=10090 Gene_Symbol=Rps5 40S ribosomal protein S5;>IPI:IPI00125521.3|SWISS-PROT:P97461 Tax_Id=10090 Gene_Symbol=
1.89347	2.3955	3.38204	3.18167	3.77658	2.84544	2.48602	2.37299	1.50152	1.70085	2.12829	1.35097	4.20044	1.86773	2.69498	2.74461	2.43908	3.29533	2.2523	2.0879	2.39464	1.55147	2.21813	2.30213	222	0.0373984	3	8;6;4	8	8	Cirbp	Cold-inducible RNA-binding protein	IPI00121073;IPI00831352;IPI00830486	IPI00121073;IPI00831352;IPI00830486	P60824	>IPI:IPI00121073.1|SWISS-PROT:P60824|ENSEMBL:ENSMUSP00000101004|REFSEQ:NP_031731|VEGA:OTTMUSP00000020590 Tax_Id=10090 Gene_Symbol=Cirbp Cold-inducible RNA-binding protein;>IPI:IPI00831352.2|TREMBL:D3Z189|ENSEMBL:ENSMUSP00000052642|VEGA:OTTMUSP00000020591 T
2.21995	NaN	NaN	NaN	3.82351	4.67421	4.91763	5.59472	2.62577	4.46867	3.79449	3.03896	1.02857	3.13745	1.88388	4.44682	NaN	5.44573	5.40541	NaN	4.68253	5.9755	4.37848	3.53457	223	0.0422078	3	8;8;1	8	7	Plxna4	Plexin-A4	IPI00187545;IPI00876097	IPI00187545;IPI00876097;IPI00137313	Q80UG2	>IPI:IPI00187545.4|SWISS-PROT:Q80UG2|ENSEMBL:ENSMUSP00000110748|REFSEQ:NP_786926|VEGA:OTTMUSP00000015623 Tax_Id=10090 Gene_Symbol=Plxna4 Plexin-A4;>IPI:IPI00876097.1|TREMBL:B9EJ29|ENSEMBL:ENSMUSP00000047929 Tax_Id=10090 Gene_Symbol=Plxna4 Plexin A4, isofor
3.95773	3.54045	NaN	5.73263	2.81627	2.15206	3.02051	NaN	2.25245	2.16605	NaN	2.86582	4.08998	3.33333	3.70535	3.95758	3.39086	2.27097	4.72411	3.79132	2.87522	2.45206	4.03682	3.59583	224	0.0366788	3	7;6;4	7	7	Cat	catalase	IPI00869393;IPI00312058;IPI00755311	IPI00869393;IPI00312058;IPI00755311	Q3TVZ1;Q3TXQ6;Q3UF58;Q3UZE7	>IPI:IPI00869393.1|TREMBL:Q3TVZ1;Q3TXQ6;Q3UF58;Q3UZE7;Q8C6E3;Q91XI2|ENSEMBL:ENSMUSP00000028610|REFSEQ:NP_033934|VEGA:OTTMUSP00000015802 Tax_Id=10090 Gene_Symbol=Cat catalase;>IPI:IPI00312058.5|SWISS-PROT:P24270|TREMBL:Q542K4 Tax_Id=10090 Gene_Symbol=Cat Ca
0.287902	0.468736	0.572279	0.476077	0.39984	0.416858	0.37515	0.588305	0.281025	0.322674	0.332878	0.274115	0.654365	0.440645	0.316146	0.562556	0.416146	0.431611	0.515756	0.373357	0.205829	0.220809	0.394586	0.324844	225	0.0207041	3	7;6;3	7	7	Srsf2; Sfrs2	Putative uncharacterized protein	IPI00474430;IPI00121135	IPI00474430;IPI00121135;IPI00474980	Q8C671	>IPI:IPI00474430.1|TREMBL:Q8C671|ENSEMBL:ENSMUSP00000072182 Tax_Id=10090 Gene_Symbol=Sfrs2 Putative uncharacterized protein;>IPI:IPI00121135.5|SWISS-PROT:Q62093|TREMBL:A2AA29;Q99MY4;Q99MY5|ENSEMBL:ENSMUSP00000090059;ENSMUSP00000120086|REFSEQ:NP_035488|VEGA
1.4691	1.50141	1.59464	1.33788	2.04219	1.66725	1.54753	2.02069	1.43423	1.48787	1.24625	1.03024	2.61274	2.52334	1.71641	1.9516	1.75273	2.86853	1.86822	1.76519	2.34154	2.05973	1.12761	1.3367	226	0.0242563	4	7;6;2;1	7	7	Akr1b10	aldo-keto reductase family 1, member B10	IPI00222284;IPI00750687	IPI00222284;IPI00750687;IPI00273096;IPI00224181	Q8BIV6;Q8CI22;Q8R318	>IPI:IPI00222284.4|TREMBL:Q8BIV6;Q8CI22;Q8R318|ENSEMBL:ENSMUSP00000039114|REFSEQ:NP_765986|VEGA:OTTMUSP00000015664 Tax_Id=10090 Gene_Symbol=Akr1b10 aldo-keto reductase family 1, member B10;>IPI:IPI00750687.1|TREMBL:D3Z494|ENSEMBL:ENSMUSP00000110703|VEGA:OT
0.412575	0.270709	0.365417	0.605437	0.220327	0.23472	0.24161	0.288126	0.267373	0.39901	NaN	0.250238	0.55497	0.317108	0.19279	0.255193	0.265372	0.279376	0.271894	0.206007	0.202564	0.161501	0.190687	0.236911	227	0.0351978	4	7;7;6;6	7	6	Acsl4	long-chain-fatty-acid--CoA ligase 4 isoform 1	IPI00411079;IPI00331179;IPI00131701;IPI00230141	IPI00411079;IPI00331179;IPI00131701;IPI00230141	Q5D071;Q8BW44	>IPI:IPI00411079.2|TREMBL:Q5D071;Q8BW44|ENSEMBL:ENSMUSP00000033634;ENSMUSP00000108528|REFSEQ:NP_997508|VEGA:OTTMUSP00000020369;OTTMUSP00000020372 Tax_Id=10090 Gene_Symbol=Acsl4 long-chain-fatty-acid--CoA ligase 4 isoform 1;>IPI:IPI00331179.5|TREMBL:Q91YN3|
0.315139	0.474091	0.548667	0.514774	0.498878	0.613685	0.457771	0.808342	0.422137	0.5546	0.491159	0.408747	1.28284	0.864753	0.495368	0.718184	0.580349	0.587889	0.426931	0.394291	0.468889	0.297053	0.3332	0.482742	228	0.0179825	4	6;5;2;1	6	6	Ccdc47	Isoform 1 of Coiled-coil domain-containing protein 47	IPI00310518;IPI00648479	IPI00310518;IPI00648479;IPI00648435;IPI00890230	Q9D024-1	>IPI:IPI00310518.3|SWISS-PROT:Q9D024-1|TREMBL:Q0VBU4|ENSEMBL:ENSMUSP00000002043|REFSEQ:NP_080285|VEGA:OTTMUSP00000003177 Tax_Id=10090 Gene_Symbol=Ccdc47 Isoform 1 of Coiled-coil domain-containing protein 47;>IPI:IPI00648479.2|SWISS-PROT:Q9D024-2 Tax_Id=100
4.32882	4.94364	2.36474	5.01002	5.29493	8.77424	7.91264	6.43791	8.1182	7.34053	7.28597	5.3234	4.52919	5.20373	5.50873	7.59128	4.50979	7.11896	2.24442	3.46645	5.91996	6.41684	5.71461	7.45434	229	0.0298887	4	5;5;4;1	5	5	1700037H04Rik	Novel protein	IPI00758326;IPI00133853;IPI00757746	IPI00758326;IPI00133853;IPI00757746;IPI00463525	A2ANS5	>IPI:IPI00758326.1|TREMBL:A2ANS5|ENSEMBL:ENSMUSP00000028800|VEGA:OTTMUSP00000016743 Tax_Id=10090 Gene_Symbol=1700037H04Rik Novel protein;>IPI:IPI00133853.3|SWISS-PROT:Q9D1K7|TREMBL:A2ANS6|ENSEMBL:ENSMUSP00000099477|REFSEQ:NP_080367|VEGA:OTTMUSP00000016742
1.34597	2.10491	3.39974	2.9391	2.24891	2.32737	1.91435	2.73845	2.10531	2.05897	1.85223	1.95729	8	3.74014	3.87837	2.84527	2.44385	2.52877	2.51617	2.07323	1.90147	2.96235	2.70856	2.1231	230	0.0148361	2	5;5	5	5	Dbt	Lipoamide acyltransferase component of branched-chain alpha-keto acid dehydrogenase complex, mitochondrial	IPI00130535;IPI00890234	IPI00130535;IPI00890234	P53395	>IPI:IPI00130535.1|SWISS-PROT:P53395 Tax_Id=10090 Gene_Symbol=Dbt Lipoamide acyltransferase component of branched-chain alpha-keto acid dehydrogenase complex, mitochondrial;>IPI:IPI00890234.1|TREMBL:Q3TMF5;Q6LC11;Q7TND9|ENSEMBL:ENSMUSP00000000349|REFSEQ:NP
2.88276	4.19604	4.24737	3.74279	6.58414	4.80931	6.93481	7.05766	4.74901	3.92342	3.78702	4.367	7.98148	7.03928	3.75982	4.42595	4.53453	NaN	2.60065	4.17153	3.92157	5.74053	5.03778	NaN	231	0.0313665	4	6;5;3;1	6	5	Ensa	Isoform 1 of Alpha-endosulfine	IPI00409045;IPI00230470;IPI00461342	IPI00409045;IPI00230470;IPI00461342;IPI00850363	P60840-1	>IPI:IPI00409045.2|SWISS-PROT:P60840-1|ENSEMBL:ENSMUSP00000051799|REFSEQ:NP_062507 Tax_Id=10090 Gene_Symbol=Ensa Isoform 1 of Alpha-endosulfine;>IPI:IPI00230470.1|SWISS-PROT:P60840-2|ENSEMBL:ENSMUSP00000045937|REFSEQ:NP_001021383 Tax_Id=10090 Gene_Symbol=E
12.1255	7.40851	6.77645	7.72201	7.6858	6.2317	7.46436	5.23588	7.78574	8.16393	7.7694	9.70403	3.40576	5.78603	7.75615	6.55609	8.07559	6.42756	8.99038	8.45809	9.80008	10.8677	8.21423	10.6401	232	0.024582	2	44;40	44	44	Cnp	Isoform CNPII of 2,3-cyclic-nucleotide 3-phosphodiesterase	IPI00319602;IPI00229598	IPI00319602;IPI00229598	P16330-1	>IPI:IPI00319602.3|SWISS-PROT:P16330-1|TREMBL:Q3TYV5|ENSEMBL:ENSMUSP00000099409|REFSEQ:NP_034053|VEGA:OTTMUSP00000001946 Tax_Id=10090 Gene_Symbol=Cnp Isoform CNPII of 2,3-cyclic-nucleotide 3-phosphodiesterase;>IPI:IPI00229598.4|SWISS-PROT:P16330-2|TREMB
3.69399	3.24665	4.23209	NaN	NaN	NaN	NaN	3.70563	3.65043	2.36591	3.18502	3.27429	8.09585	4.03992	5.32737	6.43293	3.97488	NaN	NaN	NaN	NaN	6.2282	NaN	NaN	233	0.0109825	5	5;5;5;5;4	5	4	Map7d1; Kiaa1187; Mtap7d1	Isoform 1 of MAP7 domain-containing protein 1	IPI00282957;IPI00881853;IPI00867855;IPI00649400;IPI00649975	IPI00282957;IPI00881853;IPI00867855;IPI00649400;IPI00649975	A2AJI0-1	>IPI:IPI00282957.4|SWISS-PROT:A2AJI0-1|ENSEMBL:ENSMUSP00000054338|REFSEQ:NP_659190|VEGA:OTTMUSP00000009747 Tax_Id=10090 Gene_Symbol=Mtap7d1 Isoform 1 of MAP7 domain-containing protein 1;>IPI:IPI00881853.1|TREMBL:A8Y5P4|ENSEMBL:ENSMUSP00000113250|VEGA:OTTMU
1.46267	NaN	NaN	1.10489	1.82926	2.33951	3.58051	2.33236	2.26301	NaN	NaN	NaN	1.55492	1.56082	1.48597	1.40119	1.63503	NaN	NaN	1.93844	2.33361	2.69607	2.03397	2.54654	234	0.0025136	3	4;4;4	4	4	Strn	Striatin	IPI00352986;IPI00554884;IPI00857405	IPI00352986;IPI00554884;IPI00857405	O55106	>IPI:IPI00352986.2|SWISS-PROT:O55106 Tax_Id=10090 Gene_Symbol=Strn Striatin;>IPI:IPI00554884.1|TREMBL:Q5BKR9;Q8BKL4|ENSEMBL:ENSMUSP00000120830|REFSEQ:NP_035630|VEGA:OTTMUSP00000029658 Tax_Id=10090 Gene_Symbol=Strn Striatin, calmodulin binding protein;>IPI:
2.82294	3.49993	5.2378	3.74953	4.44425	2.57546	4.59284	2.703	3.44483	2.6024	2.41441	3.84128	5.1083	5.40015	5.02033	5.62556	3.71182	3.82511	3.84645	3.14753	2.96454	2.24648	4.06256	4.04187	235	0.0378467	8	4;4;2;2;1;1;1;1	4	4	Rbm12;Cpne1		IPI00224075;IPI00857663;IPI00830998;IPI00831094	IPI00224075;IPI00857663;IPI00830998;IPI00831094;IPI00858002;IPI00856466;IPI00856970;IPI00858302	Q8C166	>IPI:IPI00224075.1|SWISS-PROT:Q8C166|TREMBL:A3KGK6;Q3U893;Q571A1|ENSEMBL:ENSMUSP00000105236;ENSMUSP00000105237|REFSEQ:NP_733467;NP_733469|VEGA:OTTMUSP00000017195;OTTMUSP00000017203 Tax_Id=10090 Gene_Symbol=Rbm12;Cpne1 Copine-1;>IPI:IPI00857663.1|TREMBL:B7Z
0.270995	0.460448	0.463478	0.520237	0.274266	0.258927	0.344923	0.367742	0.231455	0.379824	0.241639	0.275862	0.657851	0.42633	0.380474	0.4999	0.376011	0.403616	0.307617	0.381956	0.303767	0.246427	0.374069	0.356824	236	0.0160812	2	4;4	4	4	Eif6	Eukaryotic translation initiation factor 6	IPI00115862;IPI00857575	IPI00115862;IPI00857575	O55135	>IPI:IPI00115862.1|SWISS-PROT:O55135|TREMBL:Q3U740;Q3U818;Q3UA13;Q3UBJ6;Q545K4;Q9R071|ENSEMBL:ENSMUSP00000029142|REFSEQ:NP_034709|VEGA:OTTMUSP00000017338 Tax_Id=10090 Gene_Symbol=Eif6 Eukaryotic translation initiation factor 6;>IPI:IPI00857575.2|TREMBL:A6P
3.84349	3.91114	1.14764	3.52063	6.60807	5.96872	5.28821	4.08563	6.17741	5.27454	5.88235	7.77726	1.77974	4.5208	4.73395	5.64334	3.75742	5.70907	3.68487	3.64764	5.6912	5.54539	6.04888	5.32793	237	0.0425388	2	7;3	7	4	Camk1	Calcium/calmodulin-dependent protein kinase type 1	IPI00130439	IPI00130439;IPI00830518	Q91YS8	>IPI:IPI00130439.1|SWISS-PROT:Q91YS8|TREMBL:Q3TDH8;Q3UY68;Q8BJA6|ENSEMBL:ENSMUSP00000032409|REFSEQ:NP_598687|VEGA:OTTMUSP00000025539 Tax_Id=10090 Gene_Symbol=Camk1 Calcium/calmodulin-dependent protein kinase type 1
5.87924	4.03356	3.74827	4.59939	6.46287	7.63184	7.47049	5.57631	4.3007	4.56871	5.23889	6.59544	2.63234	4.4958	6.35364	6.19463	3.29717	5.55834	5.46657	4.9848	7.81617	7.4228	6.19771	8.79121	238	0.0292773	2	31;30	31	31	Gpd2	Glycerol-3-phosphate dehydrogenase, mitochondrial	IPI00876084;IPI00331182	IPI00876084;IPI00331182	Q64521	>IPI:IPI00876084.1|SWISS-PROT:Q64521|ENSEMBL:ENSMUSP00000028167|REFSEQ:NP_001139292;NP_034404 Tax_Id=10090 Gene_Symbol=Gpd2 Glycerol-3-phosphate dehydrogenase, mitochondrial;>IPI:IPI00331182.4|TREMBL:A2AQR0|ENSEMBL:ENSMUSP00000108237|VEGA:OTTMUSP0000001343
7.41125	4.64145	2.39338	5.28877	9.22935	6.90179	6.90084	4.90725	5.55895	4.92611	4.99575	5.63698	9.75134	8.24267	9.992	6.50576	5.68667	6.0507	7.32279	9.08595	7.25111	5.91681	7.61963	7.30834	239	0.0361629	3	20;20;20	20	20	Wdr7	Isoform 1 of WD repeat-containing protein 7	IPI00120637;IPI00380997;IPI00653237	IPI00120637;IPI00380997;IPI00653237	Q920I9-1	>IPI:IPI00120637.4|SWISS-PROT:Q920I9-1 Tax_Id=10090 Gene_Symbol=Wdr7 Isoform 1 of WD repeat-containing protein 7;>IPI:IPI00380997.3|SWISS-PROT:Q920I9-2|TREMBL:Q059Q1|ENSEMBL:ENSMUSP00000072509|REFSEQ:NP_001014981 Tax_Id=10090 Gene_Symbol=Wdr7 WD repeat-con
1.12867	1.67659	NaN	NaN	1.70277	1.43379	1.61329	1.69434	1.48372	NaN	NaN	NaN	2.6124	2.21877	2.24442	1.91641	NaN	NaN	2.14763	NaN	2.09135	NaN	NaN	1.48251	240	0.0310484	3	2;2;2	2	2	Apool	Putative uncharacterized protein	IPI00874376;IPI00112493;IPI00828758	IPI00874376;IPI00112493;IPI00828758	Q9CZB4	>IPI:IPI00874376.1|TREMBL:Q9CZB4|ENSEMBL:ENSMUSP00000109041 Tax_Id=10090 Gene_Symbol=Apool Putative uncharacterized protein;>IPI:IPI00112493.2|SWISS-PROT:Q78IK4|TREMBL:B1AV13|ENSEMBL:ENSMUSP00000026599|REFSEQ:NP_080841|VEGA:OTTMUSP00000020016 Tax_Id=10090
0.13574	0.213726	0.175291	0.202745	0.174353	0.164897	0.130671	0.142609	0.21195	0.176725	0.154497	0.179385	0.14579	0.110176	0.117965	0.156143	0.197468	0.178712	0.324454	0.235532	0.14785	0.11531	0.153525	0.210332	241	0.0169808	9	7;7;6;5;5;5;5;5;5	7	2	Hist2h2aa2;Hist2h2aa1		IPI00330000;IPI00272033;IPI00153400;IPI00221463;IPI00229543;IPI00229545;IPI00265761;IPI00229542;IPI00229544	IPI00330000;IPI00272033;IPI00153400;IPI00221463;IPI00229543;IPI00229545;IPI00265761;IPI00229542;IPI00229544	Q6GSS7	>IPI:IPI00330000.4|SWISS-PROT:Q6GSS7|TREMBL:B2RWH3|ENSEMBL:ENSMUSP00000077814;ENSMUSP00000100581|REFSEQ:NP_038577;NP_835584 Tax_Id=10090 Gene_Symbol=Hist2h2aa2;Hist2h2aa1 Histone H2A type 2-A;>IPI:IPI00272033.3|SWISS-PROT:Q64523|TREMBL:Q149V4|ENSEMBL:ENSMU
0.103683	0.085778	0.0850268	0.0752049	0.0763942	0.119393	0.0748615	0.0458947	0.107455	0.0895897	0.0877655	0.083167	0.0397125	0.0824063	0.0411336	0.061361	0.0730834	0.0702346	0.0786968	0.10275	0.0410678	0.0510543	0.0293936	0.0598193	242	0.0055359	7	28;22;10;10;9;9;7	28	15	BC094435gag-pol;Clec4a1	Putative gag-pol protein	IPI00420814;IPI00380444	IPI00420814;IPI00380444;IPI00853740;IPI00850445;IPI00849767;IPI00903358;IPI00653521	Q03514;Q0VGN5;Q1W5W7	>IPI:IPI00420814.3|TREMBL:Q03514;Q0VGN5;Q1W5W7;Q8C2B1;Q9ERJ2;Q9ERJ3;Q9ERJ4 Tax_Id=10090 Gene_Symbol=BC094435 Putative gag-pol protein;>IPI:IPI00380444.1|TREMBL:Q7TQ37 Tax_Id=10090 Gene_Symbol=BC094435 Pol protein
0.368121	0.317541	0.26502	0.259821	0.156021	0.15386	0.145592	0.269818	0.143602	0.175134	0.151101	0.126347	0.394945	0.226891	0.1767	0.228128	0.237829	0.222737	0.26837	0.20154	0.142953	0.19516	0.144069	0.181015	243	0.00156833	6	15;10;10;10;3;2	15	15	Rps9	40S ribosomal protein S9	IPI00420726;IPI00856235;IPI00918411;IPI00880750	IPI00420726;IPI00856235;IPI00918411;IPI00880750;IPI00857782;IPI00858267	Q6ZWN5	>IPI:IPI00420726.3|SWISS-PROT:Q6ZWN5|ENSEMBL:ENSMUSP00000006496;ENSMUSP00000104265|REFSEQ:NP_084043|VEGA:OTTMUSP00000026495;OTTMUSP00000026499 Tax_Id=10090 Gene_Symbol=Rps9 40S ribosomal protein S9;>IPI:IPI00856235.1|TREMBL:Q96EC0;Q9CXW7|ENSEMBL:ENSMUSP000
6.57419	5.07923	4.38231	5.21159	5.83874	3.27429	6.49815	3.69686	5.21594	4.11726	5.19373	6.43418	1.71356	2.4119	3.62135	3.37667	3.62201	5.01932	4.89764	2.71813	4.90798	4.25622	9.14327	4.34273	244	0.0235369	2	12;12	12	12	Maoa	Amine oxidase [flavin-containing] A	IPI00169711;IPI00890076	IPI00169711;IPI00890076	Q64133	>IPI:IPI00169711.1|SWISS-PROT:Q64133 Tax_Id=10090 Gene_Symbol=Maoa Amine oxidase [flavin-containing] A;>IPI:IPI00890076.1|TREMBL:B1AX52;Q3TPD9;Q3U2X5;Q3UJ53|ENSEMBL:ENSMUSP00000026013|REFSEQ:NP_776101|VEGA:OTTMUSP00000018396 Tax_Id=10090 Gene_Symbol=Maoa a
6.88373	5.48637	7.17206	3.40449	9.30926	8.98877	11.4882	10.222	10.276	9.8912	7.4599	11.4621	3.76095	6.60328	7.71783	8.14797	5.49209	9.28419	13.7922	3.14594	9.57212	12.8072	12.5972	11.2222	245	0.0430236	5	11;10;6;4;2	11	11	Gm10108;LOC100045925;Cycs		IPI00265239;IPI00222419;IPI00849673	IPI00265239;IPI00222419;IPI00849673;CON__P62894;IPI00230033	P62897;Q56A15;P00009;Q8C2S2	>IPI:IPI00265239.1|REFSEQ:XP_001475300;XP_001479464 Tax_Id=10090 Gene_Symbol=Gm10108;LOC100045925 similar to cytochrome c;>IPI:IPI00222419.5|SWISS-PROT:P62897|TREMBL:Q56A15|ENSEMBL:ENSMUSP00000072829;ENSMUSP00000076944|REFSEQ:NP_031834;XP_001478445;XP_0014
3.85683	3.62805	4.18918	2.40975	3.99952	4.96968	NaN	5.37576	3.48785	5.42741	NaN	NaN	2.52992	2.87662	2.71643	3.1001	4.85814	6.27117	5.05	3.9593	NaN	NaN	5.65291	5.37432	246	0.00368904	4	10;10;9;6	10	10	Pccb	Propionyl-CoA carboxylase beta chain, mitochondrial	IPI00606510;IPI00918862;IPI00468653;IPI00918838	IPI00606510;IPI00918862;IPI00468653;IPI00918838	Q99MN9	>IPI:IPI00606510.1|SWISS-PROT:Q99MN9 Tax_Id=10090 Gene_Symbol=Pccb Propionyl-CoA carboxylase beta chain, mitochondrial;>IPI:IPI00918862.1|TREMBL:A0PJE6;Q7TMF4;Q8CFZ3;Q9DBG2|ENSEMBL:ENSMUSP00000035116|REFSEQ:NP_080111|VEGA:OTTMUSP00000045332 Tax_Id=10090 Ge
3.89332	3.46909	4.72724	2.80481	8.01089	6.89085	7.75434	5.46359	5.59691	5.53495	6.99937	5.9988	3.30568	5.65899	6.31632	4.08313	7.23589	4.90942	4.69153	3.06138	6.36456	5.73789	8.02118	6.02627	247	0.00887909	11	10;10;10;9;9;7;6;6;2;1;1	10	10	Sgip1	SH3-domain GRB2-like interacting protein 1 alpha	IPI00623241;IPI00875338;IPI00465788;IPI00311247;IPI00785215;IPI00649206;IPI00876091;IPI00648975	IPI00623241;IPI00875338;IPI00465788;IPI00311247;IPI00785215;IPI00649206;IPI00876091;IPI00648975;IPI00653374;IPI00475335;IPI00889885	A2AIY8;A7BFW0	>IPI:IPI00623241.3|TREMBL:A2AIY8;A7BFW0|ENSEMBL:ENSMUSP00000102495|VEGA:OTTMUSP00000008381 Tax_Id=10090 Gene_Symbol=Sgip1 SH3-domain GRB2-like interacting protein 1 alpha;>IPI:IPI00875338.1|ENSEMBL:ENSMUSP00000099836 Tax_Id=10090 Gene_Symbol=Sgip1 89 kDa p
5.66187	3.66771	3.46332	1.3482	4.52243	3.26126	3.21502	2.59639	4.04318	5.12952	3.86892	4.12916	4.73664	7.84991	5.31096	5.85583	4.13616	4.12133	4.76304	2.856	6.02845	5.38677	6.02482	5.52944	248	0.032511	2	16;14	16	1	Clip2	Isoform 1 of CAP-Gly domain-containing linker protein 2	IPI00467854;IPI00408543	IPI00467854;IPI00408543	Q9Z0H8-1	>IPI:IPI00467854.1|SWISS-PROT:Q9Z0H8-1|ENSEMBL:ENSMUSP00000098212|REFSEQ:NP_034120 Tax_Id=10090 Gene_Symbol=Clip2 Isoform 1 of CAP-Gly domain-containing linker protein 2;>IPI:IPI00408543.5|SWISS-PROT:Q9Z0H8-2|ENSEMBL:ENSMUSP00000037431|REFSEQ:NP_001034251
4.75987	2.82199	2.54855	3.42278	4.74091	3.76336	4.78973	3.20174	6.6234	5.18376	4.81858	5.66123	2.30054	4.63843	5.49874	4.08197	3.27354	3.52237	5.15491	3.16086	4.72813	6.88753	4.90388	6.40369	249	0.0294893	1	44	44	44	Cntn1	Contactin-1	IPI00123058	IPI00123058	P12960	>IPI:IPI00123058.1|SWISS-PROT:P12960|ENSEMBL:ENSMUSP00000000109;ENSMUSP00000067842|REFSEQ:NP_001153119;NP_001153120;NP_031753|VEGA:OTTMUSP00000015953;OTTMUSP00000015954 Tax_Id=10090 Gene_Symbol=Cntn1 Contactin-1
9.53289	7.02247	6.44496	5.77801	11.2605	10.5461	11.2215	7.21241	12.1904	10.1055	9.23617	15.9023	3.52361	6.37146	8.30565	7.67224	6.23558	7.49794	8.76271	7.83147	9.12658	10.5126	16.9311	17.7977	250	0.00507117	1	33	33	29	Alb	Serum albumin	IPI00131695	IPI00131695	P07724	>IPI:IPI00131695.3|SWISS-PROT:P07724|TREMBL:Q546G4|ENSEMBL:ENSMUSP00000031314|REFSEQ:NP_033784 Tax_Id=10090 Gene_Symbol=Alb Serum albumin
7.29981	3.57449	3.49406	5.09944	6.77461	7.09723	5.86682	5.88478	6.09459	3.69413	5.23889	6.16523	3.12774	3.83966	6.20463	4.05679	3.62489	4.78996	7.46547	5.86648	6.69075	7.56143	7.4195	8.12084	251	0.0445075	1	24	24	23	Calb2	Calretinin	IPI00119346	IPI00119346	Q08331	>IPI:IPI00119346.1|SWISS-PROT:Q08331|TREMBL:Q8CCS7|ENSEMBL:ENSMUSP00000003754|REFSEQ:NP_031612 Tax_Id=10090 Gene_Symbol=Calb2 Calretinin
0.258438	0.691228	0.374742	0.452018	0.43465	0.408881	0.360023	0.523451	0.34715	0.422369	0.395366	0.393128	NaN	0.650068	0.733837	0.690465	0.364498	0.500801	0.402998	0.325956	0.339328	0.294369	0.425351	0.404383	252	0.0181552	1	6	6	6	Dnajb11	DnaJ homolog subfamily B member 11	IPI00320241	IPI00320241	Q99KV1	>IPI:IPI00320241.1|SWISS-PROT:Q99KV1|ENSEMBL:ENSMUSP00000004574|REFSEQ:NP_080676|VEGA:OTTMUSP00000031609 Tax_Id=10090 Gene_Symbol=Dnajb11 DnaJ homolog subfamily B member 11
2.65759	3.29045	3.78086	1.86745	3.84379	5.42594	4.98927	5.56917	3.77658	3.12647	3.89332	4.45038	4.52509	4.59749	4.64102	3.26179	5.22466	3.39963	2.7707	3.87012	3.96511	3.78874	4.32826	3.65497	253	0.028528	1	6	6	6	Rab35	Ras-related protein Rab-35	IPI00130489	IPI00130489	Q6PHN9	>IPI:IPI00130489.1|SWISS-PROT:Q6PHN9|TREMBL:Q3U0T9|ENSEMBL:ENSMUSP00000031492|REFSEQ:NP_937806|VEGA:OTTMUSP00000015590 Tax_Id=10090 Gene_Symbol=Rab35 Ras-related protein Rab-35
7.06714	4.01155	3.62266	4.84707	4.98256	4.29627	3.54786	3.07901	3.48578	2.17188	2.1925	3.06984	3.47367	3.83333	5.49451	4.91957	3.85208	2.62626	3.42548	3.6626	6.00492	4.69439	4.13736	5.09191	254	0.00771872	1	14	14	3	Mag	Isoform L-MAG of Myelin-associated glycoprotein	IPI00276515	IPI00276515	P20917-1	>IPI:IPI00276515.4|SWISS-PROT:P20917-1|TREMBL:Q3T1F6;Q3ZB61;Q3ZB62|ENSEMBL:ENSMUSP00000073489 Tax_Id=10090 Gene_Symbol=Mag Isoform L-MAG of Myelin-associated glycoprotein
NaN	0.473127	0.712403	0.863334	0.44117	0.44082	0.419428	0.592768	0.447828	NaN	NaN	0.388848	0.526205	0.477783	0.368311	0.461766	0.425134	0.46049	0.427168	0.450126	0.391129	0.261568	0.358012	0.41691	255	0.0104795	1	2	2	2	Bag2	BAG family molecular chaperone regulator 2	IPI00130304	IPI00130304	Q91YN9	>IPI:IPI00130304.1|SWISS-PROT:Q91YN9|ENSEMBL:ENSMUSP00000042009|REFSEQ:NP_663367|VEGA:OTTMUSP00000024427 Tax_Id=10090 Gene_Symbol=Bag2 BAG family molecular chaperone regulator 2
1.23557	NaN	1.35468	2.09258	1.44092	1.45226	1.36253	1.42749	1.37018	1.3804	1.32506	1.4912	3.41927	2.2763	1.86404	2.19298	1.8632	1.61789	0.90843	1.61389	1.47005	1.14381	1.48085	1.70468	256	0.0170411	1	2	2	2	Vps28	Vacuolar protein sorting-associated protein 28 homolog	IPI00133591	IPI00133591	Q9D1C8	>IPI:IPI00133591.1|SWISS-PROT:Q9D1C8|TREMBL:Q8BMZ7|ENSEMBL:ENSMUSP00000077856|REFSEQ:NP_080118 Tax_Id=10090 Gene_Symbol=Vps28 Vacuolar protein sorting-associated protein 28 homolog
0.634236	1.13841	NaN	NaN	1.05908	1.24497	0.976086	1.48093	0.954654	NaN	0.820143	0.786596	2.09718	1.27348	1.12395	1.20776	1.09813	1.12504	1.23174	NaN	0.860733	0.780396	1.05639	0.916422	257	0.0360291	1	2	2	2	Acbd3	Golgi resident protein GCP60	IPI00129907	IPI00129907	Q8BMP6	>IPI:IPI00129907.7|SWISS-PROT:Q8BMP6|TREMBL:Q3TJW1;Q6P9T6|ENSEMBL:ENSMUSP00000027780|REFSEQ:NP_573488 Tax_Id=10090 Gene_Symbol=Acbd3 Golgi resident protein GCP60
6.66267	5.87406	7.33729	5.53526	NaN	NaN	NaN	NaN	NaN	NaN	4.96944	4.68582	6.41026	4.61446	4.98828	9.32836	2.52035	NaN	NaN	3.19744	6.32831	NaN	NaN	NaN	258	0.0126156	2	11;11	11	9	Adssl1	Isoform 2 of Adenylosuccinate synthetase isozyme 1	IPI00229690;IPI00123190	IPI00229690;IPI00123190	P28650-2	>IPI:IPI00229690.1|SWISS-PROT:P28650-2|ENSEMBL:ENSMUSP00000105378 Tax_Id=10090 Gene_Symbol=Adssl1 Isoform 2 of Adenylosuccinate synthetase isozyme 1;>IPI:IPI00123190.1|SWISS-PROT:P28650-1|TREMBL:Q3UBP0|ENSEMBL:ENSMUSP00000021726|REFSEQ:NP_031447 Tax_Id=100
0.814929	1.3341	1.33035	1.36095	NaN	NaN	NaN	NaN	NaN	NaN	NaN	0.676682	1.93757	1.33899	1.0038	1.23216	1.1945	NaN	NaN	0.847601	2.09288	2.28723	2.69056	NaN	259	0.011131	3	4;1;1	4	4	Cops7b	COP9 signalosome complex subunit 7b	IPI00453769	IPI00453769;IPI00880793;IPI00880634	Q8BV13	>IPI:IPI00453769.2|SWISS-PROT:Q8BV13|TREMBL:Q3TDL0|ENSEMBL:ENSMUSP00000027446;ENSMUSP00000113587|REFSEQ:NP_766562|VEGA:OTTMUSP00000033969 Tax_Id=10090 Gene_Symbol=Cops7b COP9 signalosome complex subunit 7b
NaN	NaN	NaN	NaN	1.12564	0.965531	0.920217	1.23435	2.04466	2.23624	1.59048	1.55432	NaN	NaN	NaN	1.49945	NaN	1.13186	1.076	NaN	1.28059	1.41681	1.12303	1.6837	260	0.00272508	3	3;3;1	3	3	Sel1l	Isoform 1 of Protein sel-1 homolog 1	IPI00131143;IPI00224252	IPI00131143;IPI00224252;IPI00462647	Q9Z2G6-1	>IPI:IPI00131143.1|SWISS-PROT:Q9Z2G6-1|TREMBL:Q3TT70;Q5DTL8|ENSEMBL:ENSMUSP00000021347|REFSEQ:NP_001034178 Tax_Id=10090 Gene_Symbol=Sel1l Isoform 1 of Protein sel-1 homolog 1;>IPI:IPI00224252.5|SWISS-PROT:Q9Z2G6-2|TREMBL:Q6GTY4;Q6PFR3;Q80YC0|REFSEQ:NP_0354
0.79466	1.63473	1.71356	NaN	1.61342	1.44808	1.53853	1.64029	1.03396	1.00106	1.1838	0.822842	3.23887	1.84607	1.45188	1.61418	0.931185	2.0229	0.988435	1.01832	1.55258	1.37436	1.58977	1.59574	261	0.0428796	2	5;5	5	3	Cul4b	Isoform 1 of Cullin-4B	IPI00224689;IPI00473987	IPI00224689;IPI00473987	A2A432-1	>IPI:IPI00224689.3|SWISS-PROT:A2A432-1|ENSEMBL:ENSMUSP00000059276;ENSMUSP00000110771|REFSEQ:NP_001103612;NP_082564|VEGA:OTTMUSP00000018749 Tax_Id=10090 Gene_Symbol=Cul4b Isoform 1 of Cullin-4B;>IPI:IPI00473987.7|SWISS-PROT:A2A432-2|TREMBL:Q3TP81|ENSEMBL:EN
2.43605	NaN	3.72231	NaN	2.43043	3.37575	4.24628	3.59738	NaN	NaN	NaN	NaN	NaN	1.00561	1.88374	2.06962	3.2803	2.32466	2.14841	2.41074	3.01396	3.15816	3.31148	3.32812	262	0.010007	1	5	9	5	Bcr	Breakpoint cluster region protein	IPI00380817	IPI00380817	Q6PAJ1	>IPI:IPI00380817.6|SWISS-PROT:Q6PAJ1|TREMBL:A2RRK7;Q61223;Q80UP7|ENSEMBL:ENSMUSP00000039247|REFSEQ:NP_001074881 Tax_Id=10090 Gene_Symbol=Bcr Breakpoint cluster region protein
2.771	2.0182	NaN	1.74697	NaN	NaN	NaN	NaN	3.07295	4.09937	3.3695	3.68514	7.97003	3.58925	3.62924	3.75432	NaN	NaN	1.75976	2.98686	3.94867	3.25871	NaN	3.48165	263	0.0242406	1	4	4	4	Pld3	Phospholipase D3	IPI00130624	IPI00130624	O35405	>IPI:IPI00130624.1|SWISS-PROT:O35405|TREMBL:Q9CW68|ENSEMBL:ENSMUSP00000003453;ENSMUSP00000112942;ENSMUSP00000113820|REFSEQ:NP_035246|VEGA:OTTMUSP00000042001;OTTMUSP00000042002 Tax_Id=10090 Gene_Symbol=Pld3 Phospholipase D3
0.810898	0.942152	0.925412	1.15085	0.847386	0.83633	0.8967	0.921829	0.761441	0.869263	0.734484	0.6664	1.24562	0.871384	0.950841	0.89662	0.932314	1.10616	0.844666	1.00094	0.8726	0.688421	0.838153	0.830151	264	0.0291626	3	9;9;9	9	9	Gsr	Isoform Mitochondrial of Glutathione reductase, mitochondrial	IPI00111359;IPI00956860;IPI00760002	IPI00111359;IPI00956860;IPI00760002	P47791-1	>IPI:IPI00111359.2|SWISS-PROT:P47791-1|TREMBL:Q3TWI5;Q3U9P5;Q3U9R7;Q3UAS7;Q3UB84;Q91Z57|ENSEMBL:ENSMUSP00000033992|REFSEQ:NP_034474|VEGA:OTTMUSP00000017970 Tax_Id=10090 Gene_Symbol=Gsr Isoform Mitochondrial of Glutathione reductase, mitochondrial;>IPI:IPI0
2.59855	3.4721	3.34348	2.70614	3.8398	3.65631	3.55177	3.81825	2.82885	3.07929	3.26115	3.09626	2.47721	2.24351	2.81088	2.91223	3.55631	4.31835	2.33307	2.91036	3.52361	3.7294	4.25949	3.48456	265	0.0149482	3	9;9;8	9	9	Gdap1l1	Ganglioside-induced differentiation-associated protein 1-like 1	IPI00123756;IPI00620728;IPI00752823	IPI00123756;IPI00620728;IPI00752823	Q8VE33	>IPI:IPI00123756.1|SWISS-PROT:Q8VE33|ENSEMBL:ENSMUSP00000105048|VEGA:OTTMUSP00000001026 Tax_Id=10090 Gene_Symbol=Gdap1l1 Ganglioside-induced differentiation-associated protein 1-like 1;>IPI:IPI00620728.2|TREMBL:Q3USC7|ENSEMBL:ENSMUSP00000018087|REFSEQ:NP_6
2.77262	2.83366	2.72324	2.49738	3.5084	3.2329	3.9353	3.2551	3.45686	3.54233	3.14268	3.54472	2.93936	3.05036	2.75088	3.46201	3.27268	3.58603	3.07654	2.94942	2.62082	3.14179	3.19122	2.78792	266	0.0031014	4	10;10;7;0	19	9	Ywhab	Isoform Long of 41701 protein beta/alpha	IPI00230682;IPI00760000;IPI00750790	IPI00230682;IPI00760000;IPI00750790;IPI00750197	Q9CQV8-1	>IPI:IPI00230682.6|SWISS-PROT:Q9CQV8-1|TREMBL:A2A5N2|ENSEMBL:ENSMUSP00000018470|REFSEQ:NP_061223|VEGA:OTTMUSP00000017275 Tax_Id=10090 Gene_Symbol=Ywhab Isoform Long of 14-3-3 protein beta/alpha;>IPI:IPI00760000.1|SWISS-PROT:Q9CQV8-2 Tax_Id=10090 Gene_Symbo
0.565963	0.819605	0.854263	1.18661	0.649393	0.725847	0.59805	0.789889	0.67245	0.705816	0.674036	0.59538	1.17467	0.876808	0.825559	0.97229	0.829807	0.892379	0.747328	0.802311	0.648214	0.627274	0.713114	0.714337	267	0.0207438	3	9;9;3	9	9	Farsa	Phenylalanyl-tRNA synthetase alpha chain	IPI00263874;IPI00754704	IPI00263874;IPI00754704;IPI00886213	Q8C0C7	>IPI:IPI00263874.3|SWISS-PROT:Q8C0C7|ENSEMBL:ENSMUSP00000003906|REFSEQ:NP_079924|VEGA:OTTMUSP00000025176 Tax_Id=10090 Gene_Symbol=Farsa Phenylalanyl-tRNA synthetase alpha chain;>IPI:IPI00754704.2|TREMBL:Q3U0Y9;Q4FJQ2;Q8BJG2;Q8BXN0;Q9CT72|ENSEMBL:ENSMUSP000
0.529633	0.811688	0.870625	0.885112	0.656987	0.6664	0.583022	0.933794	0.556081	0.599952	0.52579	0.472813	0.992654	0.759071	0.618965	0.811688	0.732118	0.756086	0.834307	0.661332	0.679209	0.48384	0.519157	0.603209	268	0.0227355	2	9;9	9	9	Adsl	Putative uncharacterized protein	IPI00265471;IPI00308217	IPI00265471;IPI00308217	Q3TMB8;Q8VCD4	>IPI:IPI00265471.2|TREMBL:Q3TMB8;Q8VCD4|ENSEMBL:ENSMUSP00000023043|REFSEQ:NP_033764 Tax_Id=10090 Gene_Symbol=Adsl Putative uncharacterized protein;>IPI:IPI00308217.1|SWISS-PROT:P54822 Tax_Id=10090 Gene_Symbol=Adsl Adenylosuccinate lyase
3.82819	4.49155	3.93747	2.60865	3.7262	4.51426	4.7776	4.10391	4.55913	4.82532	4.80792	3.8835	2.36984	2.88359	4.62749	2.74544	2.96033	3.66005	3.37918	3.93608	4.26767	4.05121	5.49481	4.71453	269	0.0266586	4	9;8;6;2	9	9	Sccpdh	Probable saccharopine dehydrogenase	IPI00153266;IPI00653905;IPI00850402	IPI00153266;IPI00653905;IPI00850402;IPI00830434	Q8R127	>IPI:IPI00153266.1|SWISS-PROT:Q8R127|ENSEMBL:ENSMUSP00000040956|REFSEQ:NP_848768|VEGA:OTTMUSP00000024557 Tax_Id=10090 Gene_Symbol=Sccpdh Probable saccharopine dehydrogenase;>IPI:IPI00653905.3|TREMBL:D3YZ22;Q3ULN6|ENSEMBL:ENSMUSP00000095064;ENSMUSP000001067
1.55046	1.24544	1.30388	1.63932	1.17678	1.18469	1.10044	1.05592	1.04779	1.17722	1.04191	0.968898	1.69851	1.39125	1.28728	1.15818	1.45686	1.3174	1.3914	1.37954	1.16696	0.876808	1.16336	1.17163	270	0.00205202	3	15;12;1	15	9	G6pdx;G6pd; G6pd-1	Glucose-6-phosphate 1-dehydrogenase X	IPI00228385;IPI00857114	IPI00228385;IPI00857114;REV__IPI00135968	Q00612	>IPI:IPI00228385.5|SWISS-PROT:Q00612|TREMBL:Q3TNL1;Q790Y8|ENSEMBL:ENSMUSP00000004327|REFSEQ:NP_032088|VEGA:OTTMUSP00000019282 Tax_Id=10090 Gene_Symbol=G6pdx Glucose-6-phosphate 1-dehydrogenase X;>IPI:IPI00857114.1|TREMBL:A3KG36|ENSEMBL:ENSMUSP00000115915|V
6.30477	6.10165	5.35676	4.74609	5.66315	7.5838	6.70871	5.33475	8.84486	7.70891	9.58957	8.47314	3.40055	9.46163	6.30875	6.8899	5.22575	5.09139	5.96801	5.98122	8.7974	8.70398	8.08538	9.03342	271	0.0112473	3	14;1;1	14	9	Gnaq	Guanine nucleotide-binding protein G(q) subunit alpha	IPI00228618	IPI00228618;IPI00230191;IPI00848685	P21279	>IPI:IPI00228618.5|SWISS-PROT:P21279|TREMBL:Q3UHH5|ENSEMBL:ENSMUSP00000025541|REFSEQ:NP_032165 Tax_Id=10090 Gene_Symbol=Gnaq Guanine nucleotide-binding protein G(q) subunit alpha
2.94213	2.9475	1.97977	2.4564	2.40952	3.12979	3.50582	2.60797	2.93229	3.59932	3.07626	3.17672	3.13568	3.53132	3.60399	3.56608	4.42693	4.86381	2.8299	3.87372	3.37575	2.40651	2.57274	2.35483	272	0.012091	2	19;14	19	8	Cyfip2	Cytoplasmic FMR1-interacting protein 2	IPI00405625;IPI00622497	IPI00405625;IPI00622497	Q5SQX6	>IPI:IPI00405625.9|SWISS-PROT:Q5SQX6|TREMBL:Q6PGK0|ENSEMBL:ENSMUSP00000090854|REFSEQ:NP_598530|VEGA:OTTMUSP00000005638 Tax_Id=10090 Gene_Symbol=Cyfip2 Cytoplasmic FMR1-interacting protein 2;>IPI:IPI00622497.3|TREMBL:Q5SQX7;Q5STT5;Q810V4;Q8K118|ENSEMBL:ENSM
3.19581	NaN	3.89863	1.99732	3.56163	4.41267	3.46645	4.33971	3.10164	4.47087	3.43053	3.62542	3.98629	4.54607	5.24274	5.31547	2.85006	4.18533	3.41542	2.25678	4.66179	4.11794	3.57603	4.67355	273	0.0326938	2	8;7	8	8	Fsd1	Isoform 1 of Fibronectin type III and SPRY domain-containing protein 1	IPI00338998;IPI00886318	IPI00338998;IPI00886318	Q7TPM6-1	>IPI:IPI00338998.1|SWISS-PROT:Q7TPM6-1|ENSEMBL:ENSMUSP00000011733|REFSEQ:NP_899001 Tax_Id=10090 Gene_Symbol=Fsd1 Isoform 1 of Fibronectin type III and SPRY domain-containing protein 1;>IPI:IPI00886318.1|SWISS-PROT:Q7TPM6-2 Tax_Id=10090 Gene_Symbol=Fsd1 Iso
3.66582	2.79213	2.89352	3.65097	3.76279	3.20369	3.97204	3.22581	4.18989	4.16597	4.56642	4.17328	3.22612	3.32956	4.67006	3.34896	3.14238	2.66809	3.22768	2.00292	3.00454	2.5444	3.84276	4.28376	274	0.0331683	4	8;6;4;2	8	8	Tollip	Toll-interacting protein	IPI00136618;IPI00265864;IPI00886250	IPI00136618;IPI00265864;IPI00886250;IPI00856279	Q9QZ06	>IPI:IPI00136618.1|SWISS-PROT:Q9QZ06|TREMBL:A6PWS1;Q8BQL7|ENSEMBL:ENSMUSP00000001950|REFSEQ:NP_076253|VEGA:OTTMUSP00000027021 Tax_Id=10090 Gene_Symbol=Tollip Toll-interacting protein;>IPI:IPI00265864.3|TREMBL:Q8C5G6|ENSEMBL:ENSMUSP00000051485|VEGA:OTTMUSP0
2.74048	3.10415	2.7661	2.93135	2.73366	3.49052	3.09847	3.23154	3.07607	3.35458	2.9268	3.1412	2.36563	2.4888	3.332	3.29218	4.04122	2.80647	3.52274	3.81942	3.49895	4.2517	3.75897	3.27568	275	0.0387297	2	8;6	8	8	Plcxd3	PI-PLC X domain-containing protein 3	IPI00308851;IPI00758165	IPI00308851;IPI00758165	Q8BLJ3	>IPI:IPI00308851.3|SWISS-PROT:Q8BLJ3|TREMBL:B2RPW5|ENSEMBL:ENSMUSP00000053553|REFSEQ:NP_796329|VEGA:OTTMUSP00000035177 Tax_Id=10090 Gene_Symbol=Plcxd3 PI-PLC X domain-containing protein 3;>IPI:IPI00758165.1|ENSEMBL:ENSMUSP00000094252 Tax_Id=10090 Gene_Symb
1.65265	1.49806	1.43486	1.73289	1.42438	1.4744	1.30164	1.39497	1.5106	1.31382	1.29853	1.2394	1.53283	1.58972	1.75664	1.39987	1.71815	1.75309	1.54064	1.49669	1.1863	0.884095	1.36407	1.26526	276	0.00239164	2	8;5	8	8	Clic4	Chloride intracellular channel protein 4	IPI00135977;IPI00894694	IPI00135977;IPI00894694	Q9QYB1	>IPI:IPI00135977.3|SWISS-PROT:Q9QYB1|TREMBL:Q543N5|ENSEMBL:ENSMUSP00000041453|REFSEQ:NP_038913|VEGA:OTTMUSP00000010203 Tax_Id=10090 Gene_Symbol=Clic4 Chloride intracellular channel protein 4;>IPI:IPI00894694.1|TREMBL:B2KGW0;B2KGW3;Q3U8I1|VEGA:OTTMUSP000000
4.03307	3.6361	3.20431	5.86476	5.71952	4.75082	6.25352	4.52878	4.61745	3.65805	2.78396	3.34784	5.44247	7.38716	4.83045	4.76644	3.8238	5.24164	2.90884	4.21496	7.85916	5.21594	5.71494	5.26898	277	0.0146553	3	8;4;1	8	8	Map2k4	Dual specificity mitogen-activated protein kinase kinase 4	IPI00112335;IPI00649311	IPI00112335;IPI00649311;IPI00875050	P47809	>IPI:IPI00112335.1|SWISS-PROT:P47809|TREMBL:Q543X6;Q8K2U0|ENSEMBL:ENSMUSP00000041282|REFSEQ:NP_033183|VEGA:OTTMUSP00000006102 Tax_Id=10090 Gene_Symbol=Map2k4 Dual specificity mitogen-activated protein kinase kinase 4;>IPI:IPI00649311.1|TREMBL:B1ATL6|ENSEMB
0.590842	0.982608	0.908348	0.986875	0.709019	0.777242	0.750356	1.00119	0.581971	0.74195	0.701951	0.493242	0.845309	1.18803	0.963948	0.980681	0.754318	0.912742	0.815993	0.727855	0.818666	0.637024	0.786102	0.816193	278	0.0253677	4	7;6;6;5	15	7	Pcbp2	Isoform 1 of Poly(rC)-binding protein 2	IPI00127707;IPI00221799;IPI00221796;IPI00956778	IPI00127707;IPI00221799;IPI00221796;IPI00956778	Q61990-1	>IPI:IPI00127707.1|SWISS-PROT:Q61990-1|TREMBL:B2M1R7;Q3TF69|ENSEMBL:ENSMUSP00000076294|REFSEQ:NP_001096635 Tax_Id=10090 Gene_Symbol=Pcbp2 Isoform 1 of Poly(rC)-binding protein 2;>IPI:IPI00221799.1|SWISS-PROT:Q61990-3|ENSEMBL:ENSMUSP00000077509|REFSEQ:NP_03
9.17852	6.61726	5.87717	7.58035	11.7041	10.4375	7.40138	8.38293	9.6432	9.5057	8.22233	12.3274	4.5296	4.7719	8.15195	7.86968	7.83147	9.33446	8.91107	8.33889	8.66551	10.046	8.3689	8.61772	279	0.0212222	3	7;6;4	7	7	Pea15a;Pea15	Isoform 1 of Astrocytic phosphoprotein PEA-15	IPI00121013;IPI00830525;IPI00336400	IPI00121013;IPI00830525;IPI00336400	Q62048-1	>IPI:IPI00121013.1|SWISS-PROT:Q62048-1|ENSEMBL:ENSMUSP00000013842|REFSEQ:NP_035193|VEGA:OTTMUSP00000024937 Tax_Id=10090 Gene_Symbol=Pea15a Isoform 1 of Astrocytic phosphoprotein PEA-15;>IPI:IPI00830525.1|TREMBL:D3Z375|ENSEMBL:ENSMUSP00000117735|VEGA:OTTMUS
1.98358	2.79783	3.03509	2.3822	2.8112	2.61178	2.51978	2.70329	1.45256	2.03566	2.19717	1.92927	2.59148	3.3129	3.13991	2.6213	2.4108	2.78714	1.83224	2.4633	2.28938	2.10168	2.54434	2.49109	280	0.010866	2	7;6	7	7	Nt5c	5(3)-deoxyribonucleotidase, cytosolic type	IPI00124639;IPI00648626	IPI00124639;IPI00648626	Q9JM14	>IPI:IPI00124639.1|SWISS-PROT:Q9JM14|TREMBL:A2A9X6|ENSEMBL:ENSMUSP00000021082|REFSEQ:NP_056622|VEGA:OTTMUSP00000003498 Tax_Id=10090 Gene_Symbol=Nt5c 5(3)-deoxyribonucleotidase, cytosolic type;>IPI:IPI00648626.1|TREMBL:A2A9X5|ENSEMBL:ENSMUSP00000102140|VE
1.10672	1.3263	1.4444	1.27479	1.06488	1.09842	1.11402	0.931619	1.06216	1.18994	1.08454	0.955566	1.70132	1.69797	1.09421	1.27277	1.41401	0.993345	1.12405	1.19235	1.20866	1.1203	1.03637	0.902853	281	0.031653	4	11;6;5;2	28	7	Slc25a5	ADP/ATP translocase 2	IPI00127841;IPI00458351;IPI00658303	IPI00127841;IPI00458351;IPI00658303;IPI00663219	P51881	>IPI:IPI00127841.3|SWISS-PROT:P51881|TREMBL:Q545A2|ENSEMBL:ENSMUSP00000016463|REFSEQ:NP_031477|VEGA:OTTMUSP00000017802 Tax_Id=10090 Gene_Symbol=Slc25a5 ADP/ATP translocase 2;>IPI:IPI00458351.2|TREMBL:B0LAB5|ENSEMBL:ENSMUSP00000084297 Tax_Id=10090 Gene_Symb
5.85617	4.59348	4.7201	5.33049	7.84191	8.27746	7.72499	5.76004	7.51823	6.61026	5.66091	6.38325	3.94648	4.62727	6.87522	5.92909	5.66412	5.56948	5.10256	6.07275	6.34357	8.66852	7.63126	7.59474	282	0.00434704	2	7;4	7	7	Ndufv2	Isoform 1 of NADH dehydrogenase [ubiquinone] flavoprotein 2, mitochondrial	IPI00169925;IPI00845716	IPI00169925;IPI00845716	Q9D6J6-1	>IPI:IPI00169925.2|SWISS-PROT:Q9D6J6-1|ENSEMBL:ENSMUSP00000121557|REFSEQ:NP_082664|VEGA:OTTMUSP00000017460 Tax_Id=10090 Gene_Symbol=Ndufv2 Isoform 1 of NADH dehydrogenase [ubiquinone] flavoprotein 2, mitochondrial;>IPI:IPI00845716.1|SWISS-PROT:Q9D6J6-2 Tax
0.925583	1.1083	1.02054	0.927386	1.2134	1.30538	1.2701	1.47245	1.33613	1.41683	1.22914	1.22665	1.5015	0.857118	1.21454	1.01229	1.05035	1.31063	1.0009	1.15584	1.14561	1.15552	1.12788	1.1538	283	0.0447985	3	7;3;1	7	7	Cops3	COP9 signalosome complex subunit 3	IPI00131870	IPI00131870;IPI00885307;IPI00649293	O88543	>IPI:IPI00131870.3|SWISS-PROT:O88543|TREMBL:Q3TEA5;Q3UQL2;Q8BX58|ENSEMBL:ENSMUSP00000019517|REFSEQ:NP_036121|VEGA:OTTMUSP00000008453 Tax_Id=10090 Gene_Symbol=Cops3 COP9 signalosome complex subunit 3
0.268528	0.442126	0.406504	0.548908	0.264243	0.314139	0.355897	0.41249	0.317803	0.303306	0.180747	0.282661	0.529942	0.44405	0.332701	0.435123	0.331587	0.320605	0.351791	0.338834	0.306636	0.287878	0.342571	0.305782	284	0.0321888	7	7;7;7;7;7;7;7	7	6	Fxr1	Isoform E of Fragile X mental retardation syndrome-related protein 1	IPI00122521;IPI00230598;IPI00230602;IPI00230599;IPI00230601;IPI00230600;IPI00230597	IPI00122521;IPI00230598;IPI00230602;IPI00230599;IPI00230601;IPI00230600;IPI00230597	Q61584-1	>IPI:IPI00122521.1|SWISS-PROT:Q61584-1|ENSEMBL:ENSMUSP00000001620|REFSEQ:NP_001106659 Tax_Id=10090 Gene_Symbol=Fxr1 Isoform E of Fragile X mental retardation syndrome-related protein 1;>IPI:IPI00230598.1|SWISS-PROT:Q61584-3 Tax_Id=10090 Gene_Symbol=Fxr1 Is
0.915416	0.98464	1.23012	1.43769	0.992851	0.948317	0.917011	0.96581	0.875273	1.05568	0.891822	0.722387	1.52147	1.21333	0.995917	1.07944	1.18666	1.02339	1.02845	1.11664	0.877424	0.668583	0.874355	0.96367	285	0.0190645	3	6;6;6	6	6	Bsg	Isoform 1 of Basigin	IPI00408495;IPI00462199;IPI00113869	IPI00408495;IPI00462199;IPI00113869	P18572-1	>IPI:IPI00408495.1|SWISS-PROT:P18572-1|ENSEMBL:ENSMUSP00000070751|REFSEQ:NP_033898 Tax_Id=10090 Gene_Symbol=Bsg Isoform 1 of Basigin;>IPI:IPI00462199.1|TREMBL:O55107 Tax_Id=10090 Gene_Symbol=Bsg Basigin (Fragment);>IPI:IPI00113869.1|SWISS-PROT:P18572-2|TRE
1.31876	1.5895	1.8826	2.03484	1.69978	1.67059	1.68336	1.76358	1.43117	1.26517	1.38964	1.31796	1.99477	1.9996	1.63546	2.03666	1.66533	1.28251	1.20446	1.7123	1.74627	1.48969	1.75226	NaN	286	0.0151336	3	6;6;4	6	6	Nae1	NEDD8-activating enzyme E1 regulatory subunit	IPI00404981;IPI00882156;IPI00848590	IPI00404981;IPI00882156;IPI00848590	Q8VBW6	>IPI:IPI00404981.1|SWISS-PROT:Q8VBW6|TREMBL:Q3TS59;Q3UK27|ENSEMBL:ENSMUSP00000034349|REFSEQ:NP_659180|VEGA:OTTMUSP00000037203 Tax_Id=10090 Gene_Symbol=Nae1 NEDD8-activating enzyme E1 regulatory subunit;>IPI:IPI00882156.1|VEGA:OTTMUSP00000037204 Tax_Id=1009
6.70241	4.70345	7.15052	8.44951	7.21605	9.13409	7.27537	7.0497	7.92205	6.24961	6.80967	7.5706	4.32994	5.74614	6.41725	6.2751	5.89345	8.2352	8.75044	9.29627	9.84252	7.63534	9.01632	9.08513	287	0.0232786	4	6;5;3;3	6	6	Cds2	Phosphatidate cytidylyltransferase 2	IPI00468999;IPI00755231;IPI00750972;IPI00751573	IPI00468999;IPI00755231;IPI00750972;IPI00751573	Q99L43	>IPI:IPI00468999.4|SWISS-PROT:Q99L43|TREMBL:A2AMQ4|ENSEMBL:ENSMUSP00000099470|REFSEQ:NP_619592|VEGA:OTTMUSP00000016575 Tax_Id=10090 Gene_Symbol=Cds2 Phosphatidate cytidylyltransferase 2;>IPI:IPI00755231.1|TREMBL:A2AMQ5;Q8BX08|ENSEMBL:ENSMUSP00000086886|VEG
1.60339	1.93469	1.77164	1.86738	1.87786	2.00549	1.91022	1.6409	1.85856	2.17467	2.3006	1.87168	1.86195	1.73079	1.77459	1.62401	2.1	2.31965	1.81712	2.11577	1.95008	1.86585	1.98815	2.00944	288	0.0363269	4	9;8;2;1	9	6	Rab5c	Ras-related protein Rab-5C	IPI00224518;IPI00404579	IPI00224518;IPI00404579;IPI00649007;IPI00648335	P35278	>IPI:IPI00224518.2|SWISS-PROT:P35278|TREMBL:Q3TCT9;Q3TJ39|ENSEMBL:ENSMUSP00000102987|REFSEQ:NP_077776|VEGA:OTTMUSP00000001995 Tax_Id=10090 Gene_Symbol=Rab5c Ras-related protein Rab-5C;>IPI:IPI00404579.1|TREMBL:Q8C266|ENSEMBL:ENSMUSP00000019317|VEGA:OTTMUSP
0.909753	0.857927	NaN	NaN	1.35413	1.4052	1.06553	1.25916	1.04775	NaN	0.906947	0.924129	0.928247	0.954107	0.698129	0.854628	NaN	1.30722	1.21347	1.50326	1.01904	0.918189	1.33713	1.22838	289	0.00174219	2	7;6	7	6	Acaca	Isoform 2 of Acetyl-CoA carboxylase 1	IPI00848443;IPI00474783	IPI00848443;IPI00474783	Q5SWU9-2	>IPI:IPI00848443.1|SWISS-PROT:Q5SWU9-2|ENSEMBL:ENSMUSP00000048865;ENSMUSP00000116174|VEGA:OTTMUSP00000012491 Tax_Id=10090 Gene_Symbol=Acaca Isoform 2 of Acetyl-CoA carboxylase 1;>IPI:IPI00474783.4|SWISS-PROT:Q5SWU9-1|TREMBL:Q9ESZ5|ENSEMBL:ENSMUSP0000002084
0.553342	0.652018	0.656082	0.606024	NaN	0.465571	NaN	NaN	0.412354	0.566765	NaN	NaN	0.652784	0.482812	0.428302	0.539695	0.489524	0.416615	0.404498	0.55497	0.403568	NaN	0.317068	NaN	290	0.0208558	2	6;5	6	6	Fam98a	Protein FAM98A	IPI00457756;IPI00876315	IPI00457756;IPI00876315	Q3TJZ6	>IPI:IPI00457756.2|SWISS-PROT:Q3TJZ6|TREMBL:B8JJG1;Q8BL36|ENSEMBL:ENSMUSP00000108126|REFSEQ:NP_598508|VEGA:OTTMUSP00000043867 Tax_Id=10090 Gene_Symbol=Fam98a Protein FAM98A;>IPI:IPI00876315.1|ENSEMBL:ENSMUSP00000002070 Tax_Id=10090 Gene_Symbol=Fam98a 54 kD
1.28254	1.62396	1.62787	1.7099	1.36284	1.37785	1.22755	1.46869	1.33964	1.11996	1.21502	1.31134	1.75408	1.4756	1.54722	1.53034	1.76963	1.44955	1.44619	1.47497	1.26097	1.35571	1.50991	1.43513	291	0.0107793	3	6;4;1	13	6	Ehd1	EH domain-containing protein 1	IPI00126083;IPI00653573	IPI00126083;IPI00653573;IPI00402968	Q9WVK4	>IPI:IPI00126083.3|SWISS-PROT:Q9WVK4|TREMBL:Q3TCK3;Q3TGS1;Q3TIT3;Q3TUW9;Q80ZZ0;Q8K1X5|ENSEMBL:ENSMUSP00000025684|REFSEQ:NP_034249|VEGA:OTTMUSP00000020169 Tax_Id=10090 Gene_Symbol=Ehd1 EH domain-containing protein 1;>IPI:IPI00653573.1|TREMBL:Q3T9A1|ENSEMBL:
4.63199	3.64644	2.95858	4.29978	4.44939	4.09769	4.25279	4.0858	5.11745	5.31604	4.62	5.87959	3.81068	2.72168	3.79104	3.36564	4.38962	3.13627	2.21872	4.62942	4.47928	6.54065	5.69087	4.52223	292	0.0129473	2	6;4	6	6	Ap2s1	AP-2 complex subunit sigma	IPI00118022;IPI00876402	IPI00118022;IPI00876402	P62743	>IPI:IPI00118022.1|SWISS-PROT:P62743|TREMBL:Q3UJ76|ENSEMBL:ENSMUSP00000083281|REFSEQ:NP_941015|VEGA:OTTMUSP00000025971 Tax_Id=10090 Gene_Symbol=Ap2s1 AP-2 complex subunit sigma;>IPI:IPI00876402.1|TREMBL:Q7TT10|ENSEMBL:ENSMUSP00000104137 Tax_Id=10090 Gene_S
0.733407	1.17336	0.945895	1.18345	0.944287	0.928247	0.946432	1.05676	0.870777	0.923617	0.818264	0.803342	1.916	1.35203	1.08237	1.0561	0.885112	1.09228	0.83022	0.956023	0.912992	0.720254	0.91391	0.866551	293	0.016268	2	10;7	10	6	Psma3	Proteasome subunit alpha type-3	IPI00331644;IPI00475256	IPI00331644;IPI00475256	O70435	>IPI:IPI00331644.5|SWISS-PROT:O70435|TREMBL:Q58EV4;Q9DCD8|ENSEMBL:ENSMUSP00000071624|REFSEQ:NP_035314 Tax_Id=10090 Gene_Symbol=Psma3 Proteasome subunit alpha type-3;>IPI:IPI00475256.2|REFSEQ:XP_001472065;XP_001477646 Tax_Id=10090 Gene_Symbol=Gm13835 simila
4.47968	4.46768	3.81869	3.58012	6.04376	5.9805	5.82445	5.76834	4.95933	4.98281	3.84187	4.65658	5.13901	6.07091	4.00737	4.99077	5.49813	7.44436	4.66331	4.05811	5.64366	5.86992	5.89345	6.23636	294	0.0123784	3	6;2;2	6	6	Inpp1	Inositol polyphosphate 1-phosphatase	IPI00114801	IPI00114801;IPI00880424;IPI00880579	P49442	>IPI:IPI00114801.2|SWISS-PROT:P49442|ENSEMBL:ENSMUSP00000027271|REFSEQ:NP_032410|VEGA:OTTMUSP00000032847 Tax_Id=10090 Gene_Symbol=Inpp1 Inositol polyphosphate 1-phosphatase
1.01079	1.39614	1.31555	1.46293	1.19573	1.10257	1.14413	1.05389	1.00178	1.00243	0.942063	0.926956	1.49658	1.19483	1.18845	1.29909	1.30291	1.44007	0.954654	1.16352	1.05799	0.817661	1.22844	1.20234	295	0.0492306	3	6;2;2	7	6	Twf1	Twinfilin-1	IPI00314844	IPI00314844;IPI00762705;IPI00776355	Q91YR1	>IPI:IPI00314844.2|SWISS-PROT:Q91YR1|ENSEMBL:ENSMUSP00000023087|REFSEQ:NP_032997|VEGA:OTTMUSP00000019148 Tax_Id=10090 Gene_Symbol=Twf1 Twinfilin-1
0.103711	0.146962	0.12536	0.152279	0.088739	0.0917095	0.0814332	0.105874	0.0900576	0.0973236	0.0947957	0.101636	0.12812	0.126764	0.103851	0.117642	0.111215	0.107199	0.0840125	0.159418	0.0873057	0.0486263	0.0883158	0.0973047	296	0.0142621	4	5;5;4;3	5	5	Ptma	Prothymosin alpha	IPI00224784;IPI00625829;IPI00848506;IPI00406841	IPI00224784;IPI00625829;IPI00848506;IPI00406841	P26350	>IPI:IPI00224784.4|SWISS-PROT:P26350|TREMBL:Q0VGU2;Q3U6E4;Q3U8X6;Q3UA54;Q8C2T3|ENSEMBL:ENSMUSP00000044188|REFSEQ:NP_032998 Tax_Id=10090 Gene_Symbol=Ptma Prothymosin alpha;>IPI:IPI00625829.2|REFSEQ:XP_001479494;XP_001481088 Tax_Id=10090 Gene_Symbol=Gm4617 h
0.188733	0.257639	0.304915	0.27274	0.179154	0.184216	0.21058	0.235538	0.214004	0.186755	0.165648	0.219068	0.259565	0.212752	0.19889	0.19906	0.198016	0.207991	0.242401	0.19223	0.141423	0.143914	0.189093	0.201845	297	0.0295487	3	5;5;4	6	5	Anp32b	Isoform 2 of Acidic leucine-rich nuclear phosphoprotein 32 family member B	IPI00113536;IPI00831258;IPI00850695	IPI00113536;IPI00831258;IPI00850695	Q9EST5-2	>IPI:IPI00113536.3|SWISS-PROT:Q9EST5-2|ENSEMBL:ENSMUSP00000083521 Tax_Id=10090 Gene_Symbol=Anp32b Isoform 2 of Acidic leucine-rich nuclear phosphoprotein 32 family member B;>IPI:IPI00831258.1|SWISS-PROT:Q9EST5-1|TREMBL:Q3UW32|ENSEMBL:ENSMUSP00000099990|REF
2.17855	2.58531	2.6275	3.22456	3.16646	2.72576	3.16746	3.03131	2.55011	2.51515	2.53672	3.1503	2.31043	2.28102	1.79186	2.30489	2.64424	3.06843	2.09078	2.6455	3.05773	2.91494	2.69622	3.25881	298	0.0145081	3	6;6;1	6	5	Stam	Putative uncharacterized protein	IPI00137731;IPI00749697	IPI00137731;IPI00749697;IPI00758146	P70297	>IPI:IPI00137731.5|SWISS-PROT:P70297|TREMBL:Q3TPR2;Q3TQ49;Q3UMC8;Q9CU37|ENSEMBL:ENSMUSP00000100025|REFSEQ:NP_035614|VEGA:OTTMUSP00000012191 Tax_Id=10090 Gene_Symbol=Stam Putative uncharacterized protein;>IPI:IPI00749697.1|TREMBL:Q3UGN9|ENSEMBL:ENSMUSP00000
1.73641	1.77933	2.18398	2.23519	1.47656	1.87336	1.87681	2.11618	1.60154	1.67909	1.35573	1.19177	2.24815	2.31102	1.69661	1.92752	1.93825	1.99053	2.01459	1.66063	1.89211	1.20853	1.68879	1.75082	299	0.0346433	2	5;5	5	5	Dync1li2	Cytoplasmic dynein 1 light intermediate chain 2	IPI00420806;IPI00928256	IPI00420806;IPI00928256	Q6PDL0	>IPI:IPI00420806.3|SWISS-PROT:Q6PDL0 Tax_Id=10090 Gene_Symbol=Dync1li2 Cytoplasmic dynein 1 light intermediate chain 2;>IPI:IPI00928256.1|TREMBL:Q3UGJ3|ENSEMBL:ENSMUSP00000045480|REFSEQ:NP_001013398 Tax_Id=10090 Gene_Symbol=Dync1li2 cytoplasmic dynein 1 li
2.1616	2.12319	2.44469	2.32067	2.0722	2.23624	2.07969	2.17212	1.79536	1.90621	1.35046	1.97289	2.01475	1.91799	1.75457	1.8314	1.87238	2.21754	2.22183	2.30012	1.89057	1.74414	2.27894	1.91567	300	0.0145711	4	5;4;2;1	5	5	Pibf1	progesterone-induced blocking factor 1 isoform a	IPI00410925;IPI00317622	IPI00410925;IPI00317622;IPI00652247;IPI00474142	Q9CVX7	>IPI:IPI00410925.5|TREMBL:Q9CVX7|ENSEMBL:ENSMUSP00000022650|REFSEQ:NP_083596 Tax_Id=10090 Gene_Symbol=Pibf1 progesterone-induced blocking factor 1 isoform a;>IPI:IPI00317622.6|TREMBL:Q14CF8;Q8BIR5|REFSEQ:NP_083730 Tax_Id=10090 Gene_Symbol=Pibf1 progesteron
3.62201	4.26348	4.46449	4.25659	4.31947	5.16023	4.78057	4.28064	3.63134	3.85773	3.9968	2.45092	4.88424	5.18269	4.66614	4.68121	4.2123	5.30448	3.43631	4.40063	4.36968	4.41657	4.15076	4.094	301	0.0257231	3	5;4;1	5	5	Fis1	Mitochondrial fission 1 protein	IPI00132217;IPI00857192	IPI00132217;IPI00857192;IPI00856326	Q9CQ92	>IPI:IPI00132217.1|SWISS-PROT:Q9CQ92|ENSEMBL:ENSMUSP00000019198|REFSEQ:NP_079838|VEGA:OTTMUSP00000027340 Tax_Id=10090 Gene_Symbol=Fis1 Mitochondrial fission 1 protein;>IPI:IPI00857192.1|ENSEMBL:ENSMUSP00000106723|REFSEQ:NP_001156715|VEGA:OTTMUSP00000027341
0.147425	0.153032	0.155335	0.194936	0.13352	0.147098	0.123773	0.187014	0.127039	0.153304	0.102726	0.117342	0.171324	0.104016	0.134669	0.137912	0.251269	0.188811	0.18715	0.147641	0.144306	0.0899604	0.141385	0.147636	302	0.0466676	2	5;4	5	5	Actl6a	Actin-like protein 6A	IPI00323660;IPI00830569	IPI00323660;IPI00830569	Q9Z2N8	>IPI:IPI00323660.1|SWISS-PROT:Q9Z2N8|TREMBL:Q3TF62;Q505L1|ENSEMBL:ENSMUSP00000029214|REFSEQ:NP_062647|VEGA:OTTMUSP00000024516 Tax_Id=10090 Gene_Symbol=Actl6a Actin-like protein 6A;>IPI:IPI00830569.1|TREMBL:D3YVN1|ENSEMBL:ENSMUSP00000114317|VEGA:OTTMUSP0000
0.303472	0.370302	0.326648	0.407764	0.419586	0.458547	0.377715	0.47644	0.393949	0.436281	0.441034	0.35251	0.332745	0.320164	0.296182	0.371044	0.46151	0.415507	0.377915	0.362332	0.363174	0.350508	0.361559	0.438693	303	0.0216808	2	5;3	5	5	Ranbp1	Ran-specific GTPase-activating protein (Fragment)	IPI00321978;IPI00858118	IPI00321978;IPI00858118	P34022	>IPI:IPI00321978.3|SWISS-PROT:P34022|TREMBL:O08846;Q3U6M5|ENSEMBL:ENSMUSP00000111309|REFSEQ:NP_035369|VEGA:OTTMUSP00000031864 Tax_Id=10090 Gene_Symbol=Ranbp1 Ran-specific GTPase-activating protein (Fragment);>IPI:IPI00858118.1|ENSEMBL:ENSMUSP00000055288|VE
0.83689	1.25796	1.41151	1.39005	1.10284	1.10078	0.955749	1.31199	0.940734	0.988924	0.947239	0.771129	1.5562	1.32626	1.18273	1.34253	1.31239	1.39223	0.881057	1.38089	0.974659	0.876578	1.00633	0.99108	304	0.0211817	3	5;2;2	5	5	Hsd17b12	Isoform 1 of Estradiol 17-beta-dehydrogenase 12	IPI00119219	IPI00119219;IPI00785470;IPI00458208	O70503-1	>IPI:IPI00119219.2|SWISS-PROT:O70503-1|TREMBL:Q0VGQ1;Q9CSR6|ENSEMBL:ENSMUSP00000028619|REFSEQ:NP_062631|VEGA:OTTMUSP00000015984 Tax_Id=10090 Gene_Symbol=Hsd17b12 Isoform 1 of Estradiol 17-beta-dehydrogenase 12
0.192879	0.277809	0.26455	0.241517	0.203948	0.193032	0.227568	0.252283	0.242713	0.310752	0.23494	0.252449	0.245996	0.235988	0.2352	0.234022	0.235405	0.238977	0.249085	0.238692	0.198039	0.17869	0.210797	0.209868	305	0.028531	2	14;5	14	5	LOC100045999;Ran;Rasl2-8		IPI00134621	IPI00134621;IPI00126133	P62827	>IPI:IPI00134621.3|SWISS-PROT:P62827|TREMBL:Q3ULW0|ENSEMBL:ENSMUSP00000031383;ENSMUSP00000106975|REFSEQ:NP_033417;XP_001475472|VEGA:OTTMUSP00000018390;OTTMUSP00000018391 Tax_Id=10090 Gene_Symbol=LOC100045999;Ran GTP-binding nuclear protein Ran
8.52515	5.71265	6.40328	6.90084	8.89047	9.29109	9.58405	6.82175	8.50051	8.4832	8.64006	8.88889	5.79207	6.87096	8.49329	8.5266	7.06265	8.39278	9.55749	7.46993	8.46812	10.1463	9.18105	9.21149	306	0.0498405	3	43;43;12	43	43	Nsf	Vesicle-fusing ATPase	IPI00656325;IPI00876255	IPI00656325;IPI00876255;IPI00752026	P46460	>IPI:IPI00656325.2|SWISS-PROT:P46460|ENSEMBL:ENSMUSP00000099364|REFSEQ:NP_032766|VEGA:OTTMUSP00000002926 Tax_Id=10090 Gene_Symbol=Nsf Vesicle-fusing ATPase;>IPI:IPI00876255.1|ENSEMBL:ENSMUSP00000048947 Tax_Id=10090 Gene_Symbol=Nsf 83 kDa protein
1.13841	1.80089	1.93061	2.17879	1.90665	2.10371	2.10975	2.51307	1.50657	1.86965	1.61873	1.43135	2.03136	2.16741	2.04382	2.28912	2.16877	2.49875	2.06334	1.97064	1.8809	2.0193	1.56419	1.86404	307	0.0324078	4	4;4;4;3	4	4	Tfam	Isoform Mitochondrial of Transcription factor A, mitochondrial	IPI00112822;IPI00230512;IPI00895166;IPI00895392	IPI00112822;IPI00230512;IPI00895166;IPI00895392	P40630-1	>IPI:IPI00112822.2|SWISS-PROT:P40630-1|TREMBL:Q3TSW9|ENSEMBL:ENSMUSP00000090086|REFSEQ:NP_033386|VEGA:OTTMUSP00000040542 Tax_Id=10090 Gene_Symbol=Tfam Isoform Mitochondrial of Transcription factor A, mitochondrial;>IPI:IPI00230512.3|SWISS-PROT:P40630-2|TRE
1.22478	1.19103	1.32619	1.55819	1.08	1.08432	1.15667	1.22932	1.02375	1.20152	1.12365	1.0393	1.15388	1.214	1.21694	1.18684	1.33658	1.26067	1.21538	1.22175	1.24089	1.02302	1.1844	1.20527	308	0.0274395	8	4;4;3;3;3;2;2;1	4	4	Gm10145	similar to LOC446231 protein	IPI00116718;IPI00128760;IPI00849320;IPI00849842;IPI00969325;IPI00408149;IPI00858089	IPI00116718;IPI00128760;IPI00849320;IPI00849842;IPI00969325;IPI00408149;IPI00858089;IPI00849430		>IPI:IPI00116718.1|ENSEMBL:ENSMUSP00000076952|REFSEQ:XP_001475499;XP_001475911 Tax_Id=10090 Gene_Symbol=Gm10145 similar to LOC446231 protein;>IPI:IPI00128760.1|SWISS-PROT:P68037|TREMBL:Q3TW19;Q561N4|ENSEMBL:ENSMUSP00000087658;ENSMUSP00000111363|REFSEQ:NP_0
0.660458	1.26397	0.758783	1.08131	1.20127	1.21557	0.814996	0.647082	0.959693	1.11844	0.668852	0.754888	2.04219	1.55328	1.2622	1.31806	1.51494	0.973236	0.929109	1.17804	1.12152	1.11811	1.29192	1.03245	309	0.0362012	3	4;4;3	4	4	Nfu1	NFU1 iron-sulfur cluster scaffold homolog, mitochondrial isoform 1 precursor	IPI00278230;IPI00881509;IPI00881776	IPI00278230;IPI00881509;IPI00881776	Q9QZ23	>IPI:IPI00278230.5|ENSEMBL:ENSMUSP00000032060;ENSMUSP00000113637|REFSEQ:NP_001164062|VEGA:OTTMUSP00000038172 Tax_Id=10090 Gene_Symbol=Nfu1 NFU1 iron-sulfur cluster scaffold homolog, mitochondrial isoform 1 precursor;>IPI:IPI00881509.2|SWISS-PROT:Q9QZ23|ENS
1.74602	2.77932	2.88634	2.9941	2.52883	2.50784	2.44702	3.8184	2.1588	2.16408	2.13047	2.01467	2.24775	2.43552	2.33176	2.33547	2.45501	3.03979	2.15466	2.32412	1.92441	1.6301	1.88615	2.14555	310	0.0332052	3	8;5;2	8	4	Rhoa	Transforming protein RhoA	IPI00315100;IPI00458109	IPI00315100;IPI00458109;IPI00133412	Q9QUI0	>IPI:IPI00315100.1|SWISS-PROT:Q9QUI0|TREMBL:Q3TN61;Q4VAE6|ENSEMBL:ENSMUSP00000007959|REFSEQ:NP_058082 Tax_Id=10090 Gene_Symbol=Rhoa Transforming protein RhoA;>IPI:IPI00458109.1|REFSEQ:XP_485435;XP_910736 Tax_Id=10090 Gene_Symbol=Gm12844;LOC631743 similar t
1.34088	2.11224	NaN	2.77408	1.46576	1.70259	1.36573	1.92935	1.44527	1.58753	1.40598	NaN	NaN	NaN	1.85268	2.1316	2.17841	2.00537	1.87382	1.904	1.56026	1.13792	1.5141	1.2985	311	0.043838	2	4;4	4	4	Comt1;Comt	Isoform Membrane-bound of Catechol O-methyltransferase	IPI00132076;IPI00759876	IPI00132076;IPI00759876	O88587-1	>IPI:IPI00132076.1|SWISS-PROT:O88587-1 Tax_Id=10090 Gene_Symbol=Comt1 Isoform Membrane-bound of Catechol O-methyltransferase;>IPI:IPI00759876.2|SWISS-PROT:O88587-2|TREMBL:Q91XH4|ENSEMBL:ENSMUSP00000000335;ENSMUSP00000111272|REFSEQ:NP_001104532;NP_001104533
3.55278	3.75573	3.46416	3.20749	4.39502	4.86263	4.51957	4.96944	4.78423	4.49964	4.28376	3.66798	5.83499	3.44258	4.1927	5.24549	5.12059	4.40917	4.09635	4.23496	3.86458	5.36826	5.11561	4.49782	312	0.0486954	2	4;4	4	4	Cox5b;LOC100046079;Gm11273		IPI00116154;IPI00785410	IPI00116154;IPI00785410	Q9D881	>IPI:IPI00116154.2|TREMBL:Q9D881|ENSEMBL:ENSMUSP00000038961;ENSMUSP00000079944|REFSEQ:NP_034072;XP_001474638;XP_001475467|VEGA:OTTMUSP00000000452 Tax_Id=10090 Gene_Symbol=Cox5b;LOC100046079 cytochrome c oxidase subunit 5B, mitochondrial;>IPI:IPI00785410.1|
4.48571	4.85037	5.83839	5.02563	5.46508	7.11035	5.77968	5.88651	4.91884	4.42302	4.4613	NaN	4.81556	5.12768	5.07254	5.13031	3.93066	5.75904	4.66005	4.60427	4.05992	4.95712	3.53532	3.63517	313	0.00414137	7	6;5;3;3;3;2;1	13	4	Ahcyl2	putative adenosylhomocysteinase 3 isoform 2	IPI00754252;IPI00308446;IPI00742293;IPI00756263;IPI00955692	IPI00754252;IPI00308446;IPI00742293;IPI00756263;IPI00955692;IPI00757274;IPI00751254	A0PJF2;Q3TMT7	>IPI:IPI00754252.2|TREMBL:A0PJF2;Q3TMT7|ENSEMBL:ENSMUSP00000100060|REFSEQ:NP_001164471|VEGA:OTTMUSP00000014489 Tax_Id=10090 Gene_Symbol=Ahcyl2 putative adenosylhomocysteinase 3 isoform 2;>IPI:IPI00308446.3|SWISS-PROT:Q68FL4-1|ENSEMBL:ENSMUSP00000110897|REF
0.804829	1.21243	1.33871	1.19419	1.05314	0.912909	1.15043	1.21206	0.790389	0.901713	0.64156	0.579206	1.48405	1.00733	1.1031	1.16812	0.996413	1.04705	0.880437	0.951022	0.890472	0.702149	0.738934	0.895977	314	0.00184841	2	4;3	4	4	Vbp1	Prefoldin subunit 3	IPI00121851;IPI00830479	IPI00121851;IPI00830479	P61759	>IPI:IPI00121851.2|SWISS-PROT:P61759|TREMBL:A3KGB1;A3KMJ8|ENSEMBL:ENSMUSP00000033540|REFSEQ:NP_035822|VEGA:OTTMUSP00000022836 Tax_Id=10090 Gene_Symbol=Vbp1 Prefoldin subunit 3;>IPI:IPI00830479.1|TREMBL:Q3TIR6|ENSEMBL:ENSMUSP00000109704|VEGA:OTTMUSP00000022
4.80862	4.62663	5.66187	3.94508	5.06226	5.77067	5.32028	4.9412	3.55101	2.88934	3.87327	4.03992	3.90823	5.54478	5.58815	8.01796	3.76322	5.3166	3.98947	3.21502	4.53186	4.30367	4.84637	4.22083	315	0.0174911	2	6;5	9	4	Rab5b	Rab5B	IPI00116563;IPI00849548	IPI00116563;IPI00849548	P61021	>IPI:IPI00116563.2|SWISS-PROT:P61021|TREMBL:B2RPS1;Q0PD56|ENSEMBL:ENSMUSP00000000727|REFSEQ:NP_803130 Tax_Id=10090 Gene_Symbol=Rab5b Rab5B;>IPI:IPI00849548.1|REFSEQ:XP_485050;XP_922379 Tax_Id=10090 Gene_Symbol=Gm13991;LOC640369 similar to Rab5B
1.90291	1.79176	1.99267	2.23534	1.89387	1.77554	1.8859	1.75667	1.44304	1.67898	1.52614	1.2279	2.11394	2.19829	2.10393	1.88594	2.28415	1.83628	1.36595	1.95542	1.7001	1.27822	1.45366	1.5725	316	0.00328472	5	35;29;10;10;4	35	35	Rtn4	Isoform 1 of Reticulon-4	IPI00469392;IPI00270767	IPI00469392;IPI00270767;IPI00275539;IPI00470167;IPI00120415	Q99P72-2	>IPI:IPI00469392.2|SWISS-PROT:Q99P72-2|ENSEMBL:ENSMUSP00000099907|REFSEQ:NP_918943|VEGA:OTTMUSP00000005509 Tax_Id=10090 Gene_Symbol=Rtn4 Isoform 1 of Reticulon-4;>IPI:IPI00270767.3|SWISS-PROT:Q99P72-3|ENSEMBL:ENSMUSP00000099905|REFSEQ:NP_918940|VEGA:OTTMUS
3.85654	3.66744	3.18888	3.24307	4.2416	4.70101	4.33407	4.34235	4.32713	4.33858	4.05285	3.96259	3.43855	3.64884	4.39425	3.90396	3.66609	4.85272	3.5935	4.06124	4.45593	4.25695	4.88401	4.21603	317	0.00904825	4	33;8;3;2	33	33	Npepps	Puromycin-sensitive aminopeptidase	IPI00130000	IPI00130000;IPI00648932;IPI00649168;IPI00649421	Q11011	>IPI:IPI00130000.2|SWISS-PROT:Q11011|ENSEMBL:ENSMUSP00000001480|REFSEQ:NP_032968|VEGA:OTTMUSP00000002198 Tax_Id=10090 Gene_Symbol=Npepps Puromycin-sensitive aminopeptidase
7.07314	5.0317	4.35123	5.95912	8.31255	8.00769	7.53125	6.88658	7.85237	8.60437	7.34592	9.92654	4.68187	5.80585	7.24953	6.26802	5.63126	7.74234	8.50413	5.52853	7.49906	10.4072	10.1093	8.95656	318	0.00291521	3	33;7;3	33	33	Glud1	Glutamate dehydrogenase 1, mitochondrial	IPI00114209	IPI00114209;IPI00606398;IPI00669583	P26443	>IPI:IPI00114209.1|SWISS-PROT:P26443|TREMBL:Q3TSQ7|ENSEMBL:ENSMUSP00000022322|REFSEQ:NP_032159|VEGA:OTTMUSP00000039999 Tax_Id=10090 Gene_Symbol=Glud1 Glutamate dehydrogenase 1, mitochondrial
2.69309	2.95142	2.9663	2.75786	2.9385	3.27343	2.79244	3.21667	2.91045	2.67523	2.52487	2.45158	2.74476	3.00327	3.92665	3.34471	2.66517	3.52448	2.43938	2.86352	3.58873	3.28666	3.45173	3.15338	319	0.0370066	2	33;32	33	33	Pcx	pyruvate carboxylase isoform 1	IPI00943457;IPI00114710	IPI00943457;IPI00114710	Q3T9S7;Q3TCQ3;Q3UFS6	>IPI:IPI00943457.1|TREMBL:Q3T9S7;Q3TCQ3;Q3UFS6|REFSEQ:NP_001156418 Tax_Id=10090 Gene_Symbol=Pcx pyruvate carboxylase isoform 1;>IPI:IPI00114710.3|SWISS-PROT:Q05920|TREMBL:Q62043;Q8BP54|ENSEMBL:ENSMUSP00000063825;ENSMUSP00000109456|REFSEQ:NP_032823 Tax_Id=1
3.9882	3.51482	3.34986	4.15627	5.02437	4.73956	4.98728	3.89894	4.20239	4.3367	4.24034	3.87537	3.50877	3.2898	4.53289	4.06554	4.19622	4.76123	4.13445	4.70677	4.03861	4.87282	5.05382	4.89332	320	0.0196042	2	39;38	39	30	Ap2a2	AP-2 complex subunit alpha-2	IPI00753468;IPI00310131	IPI00753468;IPI00310131	Q3U7X9;Q69ZW4;Q6PEE6;Q8C2J5	>IPI:IPI00753468.2|TREMBL:Q3U7X9;Q69ZW4;Q6PEE6;Q8C2J5|ENSEMBL:ENSMUSP00000003038|REFSEQ:NP_031485 Tax_Id=10090 Gene_Symbol=Ap2a2 AP-2 complex subunit alpha-2;>IPI:IPI00310131.5|SWISS-PROT:P17427 Tax_Id=10090 Gene_Symbol=Ap2a2 AP-2 complex subunit alpha-2
0.214004	0.30976	0.34992	0.350324	0.292783	0.296384	0.24354	0.428449	0.205554	0.262681	0.218914	0.169955	0.600096	0.343501	0.331741	0.373594	0.340855	0.408213	0.33465	0.321264	0.28618	0.181792	0.267087	0.286788	321	0.00787156	15	3;3;3;3;3;3;2;2;2;2;2;2;2;1;1	3	3	Hmgn2	High mobility group nucleosomal binding domain 2	IPI00918033;IPI00918167;IPI00650026;IPI00338650;IPI00466537;IPI00664114;IPI00461255;IPI00626755;IPI00553294;IPI00749713;IPI00463059;IPI00850216;IPI00108884	IPI00918033;IPI00918167;IPI00650026;IPI00338650;IPI00466537;IPI00664114;IPI00461255;IPI00626755;IPI00553294;IPI00749713;IPI00463059;IPI00850216;IPI00108884;IPI00762429;IPI00762322	B7ZCQ2	>IPI:IPI00918033.1|TREMBL:B7ZCQ2|ENSEMBL:ENSMUSP00000120795|VEGA:OTTMUSP00000045093 Tax_Id=10090 Gene_Symbol=Hmgn2 High mobility group nucleosomal binding domain 2;>IPI:IPI00918167.1|TREMBL:B7ZCQ3|ENSEMBL:ENSMUSP00000114704|VEGA:OTTMUSP00000045092 Tax_Id=1
0.572738	0.804246	0.923532	0.802697	0.596374	0.497463	0.4521	0.703136	0.482625	0.622007	0.504668	0.588963	0.991768	0.809651	0.678472	0.729927	1.16538	0.632151	0.557134	0.988924	0.656944	0.41115	0.593296	0.577201	322	0.0313913	6	3;3;3;3;1;1	3	3	Sdcbp	Syntenin-1	IPI00117375;IPI00648280;IPI00649904;IPI00647998	IPI00117375;IPI00648280;IPI00649904;IPI00647998;IPI00649618;IPI00649387	O08992	>IPI:IPI00117375.1|SWISS-PROT:O08992|TREMBL:O88601;Q3TET7;Q3TWV1;Q3TXC7;Q3U6J5;Q3U6Q3;Q3U724;Q3U902;Q3UB97;Q3UBE4|ENSEMBL:ENSMUSP00000029912|REFSEQ:NP_001091697|VEGA:OTTMUSP00000004701 Tax_Id=10090 Gene_Symbol=Sdcbp Syntenin-1;>IPI:IPI00648280.2|TREMBL:Q3T
0.525238	0.750131	1.09886	0.703185	0.475964	0.510256	0.460066	0.46581	0.651763	0.680318	0.511876	0.673582	0.72469	0.635768	0.707164	0.751654	0.6182	0.841538	0.907276	0.722752	0.637511	0.519157	0.546866	0.797703	323	0.0142547	4	3;3;3;2	3	3	Arfip1	ADP-ribosylation factor interacting protein 1	IPI00875610;IPI00918397;IPI00678265;IPI00918269	IPI00875610;IPI00918397;IPI00678265;IPI00918269	E9QAY5;G5E8V9	>IPI:IPI00875610.1|ENSEMBL:ENSMUSP00000122964|REFSEQ:NP_001074562|VEGA:OTTMUSP00000043589 Tax_Id=10090 Gene_Symbol=Arfip1 ADP-ribosylation factor interacting protein 1;>IPI:IPI00918397.1|ENSEMBL:ENSMUSP00000103315|VEGA:OTTMUSP00000043588 Tax_Id=10090 Gene_
3.59712	2.81421	3.36836	2.98187	3.72676	3.72426	3.85907	3.72093	3.86458	4.25659	3.74686	4.13274	2.85461	2.89503	3.40681	3.46669	3.58629	3.17309	3.4522	3.71858	3.20348	3.19662	3.98089	4.24358	324	0.0124017	2	32;22	35	3	Crmp1	Crmp1 protein	IPI00312527;IPI00621526	IPI00312527;IPI00621526	Q3TXY0;Q6P1J1	>IPI:IPI00312527.4|TREMBL:Q3TXY0;Q6P1J1|ENSEMBL:ENSMUSP00000109795|REFSEQ:NP_001129530 Tax_Id=10090 Gene_Symbol=Crmp1 Crmp1 protein;>IPI:IPI00621526.4|TREMBL:Q3TY94;Q71H75|ENSEMBL:ENSMUSP00000084814 Tax_Id=10090 Gene_Symbol=Crmp1 Putative uncharacterized p
0.460257	0.698568	0.871004	0.894454	0.539549	0.647752	0.652571	0.679532	0.547825	0.671501	0.589136	0.575275	0.803923	0.841326	0.731475	0.753523	0.664982	0.809782	0.615082	0.683807	0.608384	0.486239	0.562715	0.545852	325	0.0458316	3	3;2;1	3	3	Mat2b	Isoform 2 of Methionine adenosyltransferase 2 subunit beta	IPI00649402;IPI00468802	IPI00649402;IPI00468802;IPI00459789	Q99LB6-2	>IPI:IPI00649402.2|SWISS-PROT:Q99LB6-2|ENSEMBL:ENSMUSP00000098901|VEGA:OTTMUSP00000005599 Tax_Id=10090 Gene_Symbol=Mat2b Isoform 2 of Methionine adenosyltransferase 2 subunit beta;>IPI:IPI00468802.5|SWISS-PROT:Q99LB6-1|ENSEMBL:ENSMUSP00000048222|REFSEQ:NP_
4.38847	3.7594	3.77216	4.27752	4.87234	5.34788	5.23396	4.76145	4.8452	4.28027	4.64749	5.005	3.27321	3.64352	5.35762	4.09098	3.98708	4.52182	4.83232	4.02609	4.96524	5.75971	5.47885	4.85154	326	0.0112726	2	27;7	27	27	Atp6v1b2	V-type proton ATPase subunit B, brain isoform	IPI00119113	IPI00119113;IPI00458922	P62814	>IPI:IPI00119113.3|SWISS-PROT:P62814|TREMBL:B0LAC8|ENSEMBL:ENSMUSP00000006435|REFSEQ:NP_031535|VEGA:OTTMUSP00000031184 Tax_Id=10090 Gene_Symbol=Atp6v1b2 V-type proton ATPase subunit B, brain isoform
2.98063	2.67037	2.6094	3.22258	3.32524	3.46693	3.05951	3.34113	3.79061	3.92927	3.23394	3.79463	3.02884	2.74356	2.97708	3.26563	3.45161	3.70769	3.10656	3.38948	3.42959	3.1343	3.38662	3.35875	327	0.00174865	3	30;16;15	30	27	Ywhae	41701 protein epsilon	IPI00118384;IPI00885651;IPI00828266	IPI00118384;IPI00885651;IPI00828266	P62259	>IPI:IPI00118384.1|SWISS-PROT:P62259|TREMBL:Q3V453;Q5SS40;Q8BPH1|ENSEMBL:ENSMUSP00000070993|REFSEQ:NP_033562|VEGA:OTTMUSP00000006521 Tax_Id=10090 Gene_Symbol=Ywhae 14-3-3 protein epsilon;>IPI:IPI00885651.1|TREMBL:D6REF3|ENSEMBL:ENSMUSP00000117877|VEGA:OTTM
1.66251	1.68251	1.61655	1.60545	1.42835	1.58456	1.43002	1.34655	1.46404	1.54055	1.43503	1.56355	1.49905	1.55877	1.78438	1.63002	1.58501	1.56617	1.56838	1.69105	1.40237	1.32331	1.35737	1.56223	328	0.00411956	10	30;22;16;14;12;11;3;1;1;1	30	26	Gm5506;Eno1;LOC100044223;Eno1; Eno-1		IPI00462072;IPI00648821;IPI00473227	IPI00462072;IPI00648821;IPI00473227;IPI00849751;IPI00649143;IPI00889980;IPI00649376;IPI00649551;IPI00649925;IPI00648260	P17182	>IPI:IPI00462072.3|SWISS-PROT:P17182|TREMBL:Q5FW97|ENSEMBL:ENSMUSP00000075513;ENSMUSP00000079727;ENSMUSP00000111647|REFSEQ:NP_001020559;NP_075608;XP_001471566|VEGA:OTTMUSP00000011140;OTTMUSP00000042672 Tax_Id=10090 Gene_Symbol=Gm5506;Eno1;LOC100044223 Alph
5.50782	5.75606	6.06833	7.19269	7.50695	6.98519	7.72738	7.36377	7.54546	7.03531	7.90452	8.25559	5.85138	6.2383	5.3952	7.69113	6.50914	6.64938	5.70841	7.6693	6.8018	8.56237	7.32547	7.86411	329	0.0164434	3	26;24;3	28	25	Syn2	Isoform IIa of Synapsin-2	IPI00469548;IPI00134492	IPI00469548;IPI00134492;IPI00474235	Q64332-1	>IPI:IPI00469548.2|SWISS-PROT:Q64332-1|ENSEMBL:ENSMUSP00000009538|REFSEQ:NP_001104485 Tax_Id=10090 Gene_Symbol=Syn2 Isoform IIa of Synapsin-2;>IPI:IPI00134492.4|SWISS-PROT:Q64332-2|TREMBL:Q8CE19|REFSEQ:NP_038709 Tax_Id=10090 Gene_Symbol=Syn2 Isoform IIb of
0.955019	1.24671	1.3055	1.27773	1.05601	1.17982	0.951113	1.1375	1.21358	1.3032	1.12658	1.05376	1.03621	0.967024	1.16224	1.04839	1.03281	1.14262	1.102	1.00806	0.839137	0.936154	0.899119	1.08962	330	0.0424391	9	2;2;2;2;1;1;1;1;1	2	2	Spata5	Spata5 protein	IPI00111113;IPI00649667;IPI00944005;IPI00649530;IPI00894847;IPI00928384;IPI00316789;IPI00928537;IPI00928002	IPI00111113;IPI00649667;IPI00944005;IPI00649530;IPI00894847;IPI00928384;IPI00316789;IPI00928537;IPI00928002	B7ZNK9	>IPI:IPI00111113.6|TREMBL:B7ZNK9|VEGA:OTTMUSP00000001749 Tax_Id=10090 Gene_Symbol=Spata5 Spata5 protein;>IPI:IPI00649667.3|SWISS-PROT:Q3UMC0|ENSEMBL:ENSMUSP00000103747|REFSEQ:NP_001156983|VEGA:OTTMUSP00000007939 Tax_Id=10090 Gene_Symbol=Spata5 Spermatogene
0.706364	1.37707	1.3421	1.66578	1.06849	1.33602	1.31039	1.62085	1.25039	1.67819	1.41579	1.24452	0.951294	0.808277	1.02586	0.935804	1.33417	1.08174	1.18171	1.06727	0.759878	0.771367	1.00836	1	331	0.0195816	3	2;2;1	2	2	Pgam5	Isoform 1 of Serine/threonine-protein phosphatase PGAM5, mitochondrial	IPI00848970;IPI00226387;IPI00461730	IPI00848970;IPI00226387;IPI00461730	Q8BX10-1	>IPI:IPI00848970.1|SWISS-PROT:Q8BX10-1|TREMBL:A1A4A7;B7ZNW0|ENSEMBL:ENSMUSP00000108124|REFSEQ:NP_001157010|VEGA:OTTMUSP00000032226 Tax_Id=10090 Gene_Symbol=Pgam5 Isoform 1 of Serine/threonine-protein phosphatase PGAM5, mitochondrial;>IPI:IPI00226387.3|SWIS
0.201268	0.273291	0.280915	0.391053	0.252092	0.25945	0.258598	0.267237	0.251908	0.330918	0.259262	0.273733	0.514403	0.363372	0.28715	0.314802	0.329294	0.371609	0.29107	0.315996	0.226804	0.227118	0.266916	0.227583	332	0.0275916	3	2;2;1	2	2	Psmg1	Proteasome assembly chaperone 1	IPI00458949;IPI00885524;IPI00885454	IPI00458949;IPI00885524;IPI00885454	Q9JK23	>IPI:IPI00458949.2|SWISS-PROT:Q9JK23|ENSEMBL:ENSMUSP00000023630|REFSEQ:NP_062410|VEGA:OTTMUSP00000022152 Tax_Id=10090 Gene_Symbol=Psmg1 Proteasome assembly chaperone 1;>IPI:IPI00885524.1|TREMBL:D3Z795|ENSEMBL:ENSMUSP00000113102|VEGA:OTTMUSP00000038441 Tax_
2.20619	3.51222	2.9832	2.97584	1.94886	2.85837	2.18122	2.3541	3.82161	3.68229	3.75403	3.56494	3.11226	2.50576	4.50735	3.89575	3.55758	3.51346	2.99832	3.21864	3.7201	3.23939	2.87365	2.34472	333	0.0164506	3	4;3;2	4	2	Lin7c	Protein lin-7 homolog C	IPI00136498;IPI00344142;IPI00875667	IPI00136498;IPI00344142;IPI00875667	O88952	>IPI:IPI00136498.1|SWISS-PROT:O88952|TREMBL:A2ARI2;Q3TS99;Q3TTY6;Q3UX93|ENSEMBL:ENSMUSP00000028583|REFSEQ:NP_035829|VEGA:OTTMUSP00000016097 Tax_Id=10090 Gene_Symbol=Lin7c Protein lin-7 homolog C;>IPI:IPI00344142.4|SWISS-PROT:Q8JZS0|ENSEMBL:ENSMUSP000000200
2.85657	2.43629	2.58793	3.26158	3.25638	3.11857	3.25034	3.07172	3.53957	3.69031	3.67823	3.65738	2.42701	2.85755	3.35368	2.98125	3.3521	3.23436	2.97318	3.40565	3.41053	3.71416	3.12432	3.83421	334	0.00241379	2	20;20	20	19	Uqcrc1	Cytochrome b-c1 complex subunit 1, mitochondrial	IPI00111885;IPI00653598	IPI00111885;IPI00653598	Q9CZ13	>IPI:IPI00111885.1|SWISS-PROT:Q9CZ13 Tax_Id=10090 Gene_Symbol=Uqcrc1 Cytochrome b-c1 complex subunit 1, mitochondrial;>IPI:IPI00653598.2|TREMBL:Q3THM1;Q3TIC8;Q3TV75;Q8K2S8;Q8VEJ2|ENSEMBL:ENSMUSP00000026743|REFSEQ:NP_079683 Tax_Id=10090 Gene_Symbol=Uqcrc1 c
5.19049	5.12112	4.22779	4.68121	5.91891	5.42859	4.8539	5.52181	6.36578	5.63825	4.97859	5.45256	4.14611	4.16233	5.07872	5.64048	5.68053	4.996	6.60851	6.20424	5.46448	5.86407	5.69152	5.61924	335	0.0375215	2	18;6	18	18	Atp6v1e1	V-type proton ATPase subunit E 1	IPI00119115	IPI00119115;IPI00377443	P50518	>IPI:IPI00119115.2|SWISS-PROT:P50518|ENSEMBL:ENSMUSP00000019354|REFSEQ:NP_031536 Tax_Id=10090 Gene_Symbol=Atp6v1e1 V-type proton ATPase subunit E 1
2.09477	2.40929	2.57367	3.23185	2.96842	2.97513	2.52372	2.68969	2.63359	2.58538	1.91142	2.36345	3.23635	3.11216	2.94447	3.16446	3.17975	3.16586	2.7205	2.92312	2.6639	2.47623	3.02243	3.15119	336	0.0315374	3	19;19;8	19	18	Idh2	52 kDa protein	IPI00875110;IPI00318614	IPI00875110;IPI00318614;IPI00857308	P54071	>IPI:IPI00875110.1|ENSEMBL:ENSMUSP00000053273 Tax_Id=10090 Gene_Symbol=Idh2 52 kDa protein;>IPI:IPI00318614.9|SWISS-PROT:P54071|ENSEMBL:ENSMUSP00000103007|REFSEQ:NP_766599|VEGA:OTTMUSP00000030144 Tax_Id=10090 Gene_Symbol=Idh2 Isocitrate dehydrogenase [NADP
3.27955	3.43242	3.19826	3.8373	4.23819	3.87207	3.78043	3.60231	4.27113	4.19041	3.84971	3.67674	2.89486	3.35312	3.27407	3.28958	3.99888	4.32826	3.41752	3.55252	3.99696	3.57334	4.01962	3.55189	337	0.00705014	2	18;16	18	18	Dld	Dihydrolipoyl dehydrogenase, mitochondrial	IPI00874456;IPI00331564	IPI00874456;IPI00331564	O08749	>IPI:IPI00874456.1|SWISS-PROT:O08749|ENSEMBL:ENSMUSP00000106481|REFSEQ:NP_031887 Tax_Id=10090 Gene_Symbol=Dld Dihydrolipoyl dehydrogenase, mitochondrial;>IPI:IPI00331564.2|TREMBL:Q3TIE8|ENSEMBL:ENSMUSP00000002980 Tax_Id=10090 Gene_Symbol=Dld Dihydrolipoyl
3.10713	2.94334	2.54849	2.8865	4.19199	4.34821	4.38866	4.26494	4.02528	3.86369	3.75305	3.23866	3.62805	4.07631	4.05268	3.69946	3.76804	4.363	2.55689	3.65617	3.95476	3.78186	4.18252	3.8279	338	0.00159462	2	20;2	20	18	Ap3b2	AP-3 complex subunit beta-2	IPI00420426	IPI00420426;IPI00471392	Q9JME5	>IPI:IPI00420426.1|SWISS-PROT:Q9JME5|TREMBL:Q3UUE3|ENSEMBL:ENSMUSP00000080739|REFSEQ:NP_067467|VEGA:OTTMUSP00000041716 Tax_Id=10090 Gene_Symbol=Ap3b2 AP-3 complex subunit beta-2
0.517572	0.721397	0.869414	0.919202	0.639345	0.688184	0.607017	0.675128	0.611023	0.609385	0.56478	0.51282	1.02523	0.817661	0.660851	0.811688	0.758668	0.84538	0.717772	0.66024	0.631473	0.485979	0.621775	0.567924	339	0.0144548	2	18;1	18	18	Pfas	Phosphoribosylformylglycinamidine synthase	IPI00265406	IPI00265406;IPI00515543	Q5SUR0	>IPI:IPI00265406.3|SWISS-PROT:Q5SUR0|TREMBL:Q3UTT7;Q8BVW7|ENSEMBL:ENSMUSP00000021282;ENSMUSP00000104308|REFSEQ:NP_001152991|VEGA:OTTMUSP00000006164 Tax_Id=10090 Gene_Symbol=Pfas Phosphoribosylformylglycinamidine synthase
6.46621	4.16667	4.49196	2.75581	6.02156	6.73945	6.55867	4.94047	3.73079	4.05121	3.46861	5.50995	3.88425	3.90152	3.67566	4.7259	5.95061	5.22084	5.712	4.32507	4.77829	7.66989	6.33152	4.96647	340	0.0395963	2	21;7	21	17	Rtn1	Reticulon-1	IPI00395193	IPI00395193;IPI00761573	Q8K0T0	>IPI:IPI00395193.1|SWISS-PROT:Q8K0T0|TREMBL:Q4FJL2|ENSEMBL:ENSMUSP00000077594|REFSEQ:NP_703187|VEGA:OTTMUSP00000017535 Tax_Id=10090 Gene_Symbol=Rtn1 Reticulon-1
3.69549	3.28515	3.08547	3.76818	3.94322	4.04891	4.42341	3.84541	4.0494	3.7022	3.68772	4.094	3.62634	3.39132	3.47198	3.4459	3.88591	4.52673	4.14697	4.0596	4.00545	4.00513	3.74294	4.41209	341	0.00170205	5	18;18;2;1;1	18	16	Sept7	septin-7	IPI00224626;IPI00874440	IPI00224626;IPI00874440;IPI00459494;IPI00275587;IPI00606459	Q3UGE0;Q3UNN1;Q5DTS3;Q8C2A3	>IPI:IPI00224626.3|TREMBL:Q3UGE0;Q3UNN1;Q5DTS3;Q8C2A3|ENSEMBL:ENSMUSP00000110927|REFSEQ:NP_033989 Tax_Id=10090 Gene_Symbol=Sept7 septin-7;>IPI:IPI00874440.1|SWISS-PROT:O55131|ENSEMBL:ENSMUSP00000052745 Tax_Id=10090 Gene_Symbol=Sept7 Septin-7
3.11876	3.66744	3.34661	3.64033	3.75615	4.3232	4.84379	4.63435	4.67224	5.1164	3.4859	4.55415	3.71996	3.47681	4.3416	4.13223	3.62319	3.66986	3.13647	3.98676	4.10526	4.09383	5.07048	5.27204	342	0.0110868	3	16;16;1	16	16	Rcn2	Putative uncharacterized protein	IPI00474959;IPI00875864	IPI00474959;IPI00875864;IPI00880633	Q3TE95;Q8BP39	>IPI:IPI00474959.2|TREMBL:Q3TE95;Q8BP39|ENSEMBL:ENSMUSP00000109915|VEGA:OTTMUSP00000034252 Tax_Id=10090 Gene_Symbol=Rcn2 Putative uncharacterized protein;>IPI:IPI00875864.1|SWISS-PROT:Q8BP92|ENSEMBL:ENSMUSP00000034871|REFSEQ:NP_036122 Tax_Id=10090 Gene_Sym
2.44582	2.43356	2.30563	2.06075	2.56371	2.71525	2.65224	2.82064	2.86164	2.65851	2.41109	2.66766	2.09661	2.21538	2.48744	2.47042	2.34621	2.49514	2.43962	2.02319	2.13557	2.47237	2.49532	2.53717	343	0.0254438	4	15;15;15;15	15	15	Acot7	cytosolic acyl coenzyme A thioester hydrolase isoform 1	IPI00125939;IPI00672508;IPI00230588;IPI00284094	IPI00125939;IPI00672508;IPI00230588;IPI00284094	Q91V12-1	>IPI:IPI00125939.3|SWISS-PROT:Q91V12-1|ENSEMBL:ENSMUSP00000030779|REFSEQ:NP_001139529|VEGA:OTTMUSP00000011019 Tax_Id=10090 Gene_Symbol=Acot7 cytosolic acyl coenzyme A thioester hydrolase isoform 1;>IPI:IPI00672508.1|SWISS-PROT:Q91V12-4|ENSEMBL:ENSMUSP00000
1.77041	2.34924	2.3034	2.43055	1.97847	1.9402	1.82053	1.716	1.74602	1.81412	1.70882	1.65036	1.79495	1.83803	1.93641	1.7722	1.85853	2.15559	1.74493	1.88218	1.76753	1.62433	1.89721	1.90418	344	0.0139651	5	15;15;14;5;4	15	15	Me1	NADP-dependent malic enzyme	IPI00881197;IPI00670735;IPI00128857	IPI00881197;IPI00670735;IPI00128857;IPI00761847;IPI00463416	Q3TQP6;Q3TQW1;Q921S3;Q99LF5;Q9DBF9	>IPI:IPI00881197.1|TREMBL:Q3TQP6;Q3TQW1;Q921S3;Q99LF5;Q9DBF9|ENSEMBL:ENSMUSP00000034989|REFSEQ:NP_032641 Tax_Id=10090 Gene_Symbol=Me1 NADP-dependent malic enzyme;>IPI:IPI00670735.1|REFSEQ:XP_001004685 Tax_Id=10090 Gene_Symbol=LOC677317 hypothetical protein
1.41353	1.66861	1.7191	1.79449	1.73112	1.87347	1.46304	1.58521	1.68916	1.77724	1.64303	1.6767	1.67743	1.58627	1.48821	1.7601	1.32139	1.50966	1.39113	1.47726	1.38739	1.18562	1.42716	1.71083	345	0.0469052	2	23;20	23	15	Kif5b	kinesin-1 heavy chain	IPI00555125;IPI00124954	IPI00555125;IPI00124954	Q05CG8;Q3UWI9;Q5BL10;Q6NSS5;Q8CFE7	>IPI:IPI00555125.1|TREMBL:Q05CG8;Q3UWI9;Q5BL10;Q6NSS5;Q8CFE7;Q9CUT6|ENSEMBL:ENSMUSP00000025083|REFSEQ:NP_032474 Tax_Id=10090 Gene_Symbol=Kif5b kinesin-1 heavy chain;>IPI:IPI00124954.1|SWISS-PROT:Q61768 Tax_Id=10090 Gene_Symbol=Kif5b Kinesin-1 heavy chain
0.542211	0.71736	0.724428	0.890393	0.528234	0.520833	0.523834	0.603027	0.583703	0.710227	0.600925	0.553281	0.597514	0.685918	0.668628	0.67245	0.738662	0.726691	0.570581	0.672043	0.606061	0.486452	0.559347	0.587475	346	0.0314254	3	14;9;4	14	14	Ppia	Peptidyl-prolyl cis-trans isomerase	IPI00554989;IPI00755515	IPI00554989;IPI00755515;IPI00874996	P17742	>IPI:IPI00554989.3|SWISS-PROT:P17742|TREMBL:Q3TE63;Q3UAJ1;Q5SVY2;Q9CZK9|ENSEMBL:ENSMUSP00000071686;ENSMUSP00000117987|REFSEQ:NP_032933|VEGA:OTTMUSP00000000741 Tax_Id=10090 Gene_Symbol=Ppia Peptidyl-prolyl cis-trans isomerase;>IPI:IPI00755515.1|TREMBL:D3Z47
0.410627	0.579912	0.632191	0.605437	0.370028	0.405186	0.39984	0.469925	0.452039	0.485696	0.395444	0.331807	0.775555	0.568149	0.476667	0.575838	0.630716	0.626881	0.573888	0.515783	0.461659	0.384778	0.56638	0.434764	347	0.00730745	4	14;14;9;6	14	14	Gart	trifunctional purine biosynthetic protein adenosine-3	IPI00230612;IPI00323644;IPI00881157	IPI00230612;IPI00323644;IPI00881157;IPI00918851	Q64737-2	>IPI:IPI00230612.3|SWISS-PROT:Q64737-2|TREMBL:Q3TGI3;Q3UJP8|ENSEMBL:ENSMUSP00000023684|REFSEQ:NP_034386|VEGA:OTTMUSP00000035755 Tax_Id=10090 Gene_Symbol=Gart trifunctional purine biosynthetic protein adenosine-3;>IPI:IPI00323644.4|SWISS-PROT:Q64737-1 Tax_I
0.395132	0.521921	0.583669	0.706265	0.454277	0.427954	0.450979	0.495319	0.400048	0.463027	0.443892	0.40282	0.635163	0.633032	0.511876	0.465354	0.440742	0.446369	0.38279	0.473462	0.417798	0.358641	0.445891	0.433934	348	0.0210953	2	14;14	14	14	Nars	Asparaginyl-tRNA synthetase, cytoplasmic	IPI00223415;IPI00918997	IPI00223415;IPI00918997	Q8BP47	>IPI:IPI00223415.4|SWISS-PROT:Q8BP47|ENSEMBL:ENSMUSP00000025483|REFSEQ:NP_001136422 Tax_Id=10090 Gene_Symbol=Nars Asparaginyl-tRNA synthetase, cytoplasmic;>IPI:IPI00918997.1|REFSEQ:NP_081626 Tax_Id=10090 Gene_Symbol=Nars asparaginyl-tRNA synthetase, cytopl
2.56818	2.29521	2.5062	3.39882	3.08223	2.74884	3.779	3.02737	2.98054	3.74504	3.76039	3.48639	2.56878	3.40785	2.70022	2.41453	2.83423	3.41647	2.62061	3.13657	3.85075	3.71802	2.82311	3.8429	349	0.0471222	2	14;14	14	14	Cyc1	Isoform 1 of Cytochrome c1, heme protein, mitochondrial	IPI00132728;IPI00845772	IPI00132728;IPI00845772	Q9D0M3-1	>IPI:IPI00132728.2|SWISS-PROT:Q9D0M3-1|ENSEMBL:ENSMUSP00000023210|REFSEQ:NP_079843 Tax_Id=10090 Gene_Symbol=Cyc1 Isoform 1 of Cytochrome c1, heme protein, mitochondrial;>IPI:IPI00845772.1|SWISS-PROT:Q9D0M3-2 Tax_Id=10090 Gene_Symbol=Cyc1 Isoform 2 of Cytoc
2.39647	2.8926	2.51294	2.85935	3.25765	3.53832	3.1747	3.55341	4.21319	3.80141	3.71003	3.72495	2.08607	3.60972	3.70576	3.15926	3.48165	3.76847	3.42032	3.59505	3.50767	3.83024	3.44519	3.31719	350	0.00726296	3	14;12;3	14	14	Atp5o;LOC100047429;D12Wsu28e		IPI00118986;IPI00461407	IPI00118986;IPI00461407;IPI00919068	Q9DB20	>IPI:IPI00118986.1|SWISS-PROT:Q9DB20|TREMBL:Q3TF25;Q3THG0|ENSEMBL:ENSMUSP00000023677|REFSEQ:NP_613063;XP_001478145|VEGA:OTTMUSP00000031018 Tax_Id=10090 Gene_Symbol=Atp5o;LOC100047429 ATP synthase subunit O, mitochondrial;>IPI:IPI00461407.1|TREMBL:D3Z4J0|EN
4.73754	4.30626	4.22744	4.26767	6.17665	5.88235	5.35877	4.27351	5.53679	5.36654	4.90557	4.75308	3.86533	4.50633	4.80423	5.11902	5.55926	4.55125	4.87543	5.91017	4.82346	5.53771	5.55031	6.10836	351	0.0493158	2	15;11	15	14	Ddah1	N(G),N(G)-dimethylarginine dimethylaminohydrolase 1	IPI00109482;IPI00880463	IPI00109482;IPI00880463	Q9CWS0	>IPI:IPI00109482.3|SWISS-PROT:Q9CWS0|TREMBL:Q3UF01|ENSEMBL:ENSMUSP00000029845|REFSEQ:NP_081269|VEGA:OTTMUSP00000037729 Tax_Id=10090 Gene_Symbol=Ddah1 N(G),N(G)-dimethylarginine dimethylaminohydrolase 1;>IPI:IPI00880463.1|TREMBL:D3YU15|ENSEMBL:ENSMUSP000001
2.73396	2.64459	2.5455	2.86033	3.2962	2.94048	3.03223	2.94777	3.46909	3.68039	3.10193	3.33968	2.24055	3.08166	2.84463	3.00255	3.37621	2.96463	2.74018	3.40171	2.73965	2.99913	2.94023	3.15388	352	0.019665	3	13;8;4	13	13	Vdac2	Voltage-dependent anion-selective channel protein 2	IPI00122547;IPI00750490	IPI00122547;IPI00750490;IPI00753287	Q60930	>IPI:IPI00122547.1|SWISS-PROT:Q60930|ENSEMBL:ENSMUSP00000022293|REFSEQ:NP_035825|VEGA:OTTMUSP00000017619 Tax_Id=10090 Gene_Symbol=Vdac2 Voltage-dependent anion-selective channel protein 2;>IPI:IPI00750490.2|TREMBL:D3YZT5|ENSEMBL:ENSMUSP00000115560|VEGA:OTT
2.55709	3.22466	2.93539	3.97409	4.12763	3.63835	3.72759	3.93871	3.74406	4.06355	3.73218	3.337	3.69331	3.52187	3.41169	3.98597	3.53832	3.66072	3.09905	3.48274	3.94306	4.1413	4.19129	4.39715	353	0.0117143	2	13;7	13	13	Arpc1a	Actin-related protein 41308 complex subunit 1A	IPI00127987;IPI00460942	IPI00127987;IPI00460942	Q9R0Q6	>IPI:IPI00127987.1|SWISS-PROT:Q9R0Q6|ENSEMBL:ENSMUSP00000031625|REFSEQ:NP_062741|VEGA:OTTMUSP00000026391 Tax_Id=10090 Gene_Symbol=Arpc1a Actin-related protein 2/3 complex subunit 1A;>IPI:IPI00460942.2|TREMBL:D3YVI5;Q9CTB9|ENSEMBL:ENSMUSP00000114421|VEGA:OT
0.87535	1.25415	1.70451	1.48599	0.948407	0.97078	1.14957	1.35855	0.989511	1.06228	0.764468	0.775314	1.40915	1.43662	1.14288	1.28112	1.83006	1.36707	1.36478	1.49131	1.07513	0.866176	1.39747	1.00759	354	0.0131791	5	13;13;13;4;2	13	13	Ubr4	Isoform 5 of E3 ubiquitin-protein ligase UBR4	IPI00648709;IPI00378681;IPI00845523	IPI00648709;IPI00378681;IPI00845523;IPI00845583;IPI00606977	A2AN08-5	>IPI:IPI00648709.2|SWISS-PROT:A2AN08-5|ENSEMBL:ENSMUSP00000069557;ENSMUSP00000114947|VEGA:OTTMUSP00000010654 Tax_Id=10090 Gene_Symbol=Ubr4 Isoform 5 of E3 ubiquitin-protein ligase UBR4;>IPI:IPI00378681.6|SWISS-PROT:A2AN08-1|ENSEMBL:ENSMUSP00000095433|REFSE
0.550267	0.479364	0.490773	0.513005	0.376974	0.425967	0.339259	0.349834	0.418218	0.379463	0.401075	0.337382	0.503981	0.404351	0.42889	0.39801	0.456913	0.481302	0.528597	0.40269	0.42673	0.261835	0.360529	0.356773	355	0.00235393	5	13;13;12;11;5	13	13	Psat1	Phosphoserine aminotransferase	IPI00115620;IPI00849478;IPI00848485;IPI00918511	IPI00115620;IPI00849478;IPI00848485;IPI00918511;IPI00918735	Q99K85	>IPI:IPI00115620.1|SWISS-PROT:Q99K85|TREMBL:Q3ULZ3;Q543K5;Q8BTJ1|ENSEMBL:ENSMUSP00000025542|REFSEQ:NP_803155|VEGA:OTTMUSP00000040286 Tax_Id=10090 Gene_Symbol=Psat1 Phosphoserine aminotransferase;>IPI:IPI00849478.1|REFSEQ:XP_001478027 Tax_Id=10090 Gene_Symb
7.15461	6.43583	6.20925	6.2162	8.83471	9.09918	8.53679	6.94637	6.59457	7.73455	7.45823	7.75254	3.37519	6.55953	6.15082	6.74855	7.31904	7.11288	7.45601	5.92171	7.7912	8.47457	7.1347	7.7232	356	0.0241022	2	13;13	13	13	Napg	Putative uncharacterized protein Napg	IPI00881096;IPI00109870	IPI00881096;IPI00109870	D3Z4B2	>IPI:IPI00881096.1|TREMBL:D3Z4B2|ENSEMBL:ENSMUSP00000122681|VEGA:OTTMUSP00000035408 Tax_Id=10090 Gene_Symbol=Napg Putative uncharacterized protein Napg;>IPI:IPI00109870.1|SWISS-PROT:Q9CWZ7|TREMBL:Q8C1T5|ENSEMBL:ENSMUSP00000025474|REFSEQ:NP_082293|VEGA:OTTM
1.70169	1.89782	1.87765	2.24155	2.07129	1.97652	1.75402	2.04931	1.99259	1.98255	1.85718	1.80923	1.78498	1.76224	1.76171	1.76215	2.11475	2.1249	1.70605	2.19443	1.64198	1.66232	1.61985	1.82739	357	0.0383139	2	13;11	13	13	Uchl1	Ubiquitin carboxyl-terminal hydrolase isozyme L1	IPI00313962;IPI00653686	IPI00313962;IPI00653686	Q9R0P9	>IPI:IPI00313962.3|SWISS-PROT:Q9R0P9|ENSEMBL:ENSMUSP00000031131|REFSEQ:NP_035800 Tax_Id=10090 Gene_Symbol=Uchl1 Ubiquitin carboxyl-terminal hydrolase isozyme L1;>IPI:IPI00653686.1|TREMBL:Q3TCH2 Tax_Id=10090 Gene_Symbol=Uchl1 Putative uncharacterized protei
2.48967	2.83551	2.78048	2.84746	3.03113	3.93128	3.48117	3.39605	3.05325	3.5402	3.1081	3.28461	2.94872	2.78893	3.36621	3.49467	2.96393	3.49675	2.4502	3.2476	3.65591	3.39893	3.27065	3.61834	358	0.0246133	2	12;8	12	12	Rab14	Ras-related protein Rab-14	IPI00126042;IPI00757464	IPI00126042;IPI00757464	Q91V41	>IPI:IPI00126042.3|SWISS-PROT:Q91V41|TREMBL:Q50HW9;Q50HX0;Q50HX1;Q50HX2;Q50HX3;Q50HX4|ENSEMBL:ENSMUSP00000028238|REFSEQ:NP_080973|VEGA:OTTMUSP00000013870 Tax_Id=10090 Gene_Symbol=Rab14 Ras-related protein Rab-14;>IPI:IPI00757464.1|TREMBL:A2AL34;Q3U9E0|ENSE
5.27899	4.66461	4.3611	5.81328	5.36423	5.5869	4.86027	4.8895	6.39427	5.40891	5.01002	6.12295	4.99326	5.07074	6.08976	5.61546	5.60695	6.04266	5.08156	5.79609	6.24922	6.46747	6.56642	6.50703	359	0.0133059	2	13;5	13	12	Pitpna	Phosphatidylinositol transfer protein alpha isoform	IPI00230003	IPI00230003;IPI00886025	P53810	>IPI:IPI00230003.7|SWISS-PROT:P53810|TREMBL:Q3TGI6;Q3TIQ3;Q3UE53;Q5ND42|ENSEMBL:ENSMUSP00000115723|REFSEQ:NP_032876|VEGA:OTTMUSP00000006520 Tax_Id=10090 Gene_Symbol=Pitpna Phosphatidylinositol transfer protein alpha isoform
1.47944	1.55236	1.42731	1.77715	1.68731	1.45438	1.44789	1.61925	1.99545	2.12305	1.80015	1.60344	1.71306	1.37788	1.75352	1.78202	1.90829	1.8622	1.77762	2.36692	2.01009	1.62353	1.66475	1.9149	360	0.0262898	11	12;12;9;9;6;6;3;3;3;3;3	12	12	Park7	Protei	IPI00117264;IPI00895414;IPI00649406;IPI00895518;IPI00649794;IPI00894769	IPI00117264;IPI00895414;IPI00649406;IPI00895518;IPI00649794;IPI00894769;IPI00650052;IPI00894598;IPI00648764;IPI00894710;IPI00955685	Q99LX0	>IPI:IPI00117264.1|SWISS-PROT:Q99LX0|ENSEMBL:ENSMUSP00000030805;ENSMUSP00000101298;ENSMUSP00000101299;ENSMUSP00000101300|REFSEQ:NP_065594|VEGA:OTTMUSP00000010787;OTTMUSP00000010788;OTTMUSP00000010789;OTTMUSP00000010895 Tax_Id=10090 Gene_Symbol=Park7 Protei
2.17836	2.37535	1.08634	3.20626	3.32104	3.5841	3.47923	3.45435	2.95534	3.67945	3.6152	2.73202	3.38284	2.78257	3.64179	2.90655	2.65125	2.77685	2.18986	1.98807	3.7022	3.09262	3.34616	3.61128	361	0.0128616	2	12;12	12	12	Gphn	gephyrin isoform 1	IPI00816946;IPI00225670	IPI00816946;IPI00225670	A0JNY3	>IPI:IPI00816946.1|TREMBL:A0JNY3|ENSEMBL:ENSMUSP00000106018|REFSEQ:NP_666077 Tax_Id=10090 Gene_Symbol=Gphn gephyrin isoform 1;>IPI:IPI00225670.1|SWISS-PROT:Q8BUV3|TREMBL:Q571C2|ENSEMBL:ENSMUSP00000054064|REFSEQ:NP_766540 Tax_Id=10090 Gene_Symbol=Gphn Gephy
6.04376	6.1717	5.57818	6.27746	7.47887	7.46826	6.20694	6.94059	7.22178	7.75013	7.15513	7.06016	4.01703	5.42241	7.07714	5.17813	6.57938	8.27472	7.36919	6.52869	7.373	5.65515	7.80823	7.67814	362	0.0157882	2	12;11	12	12	Ndufa9	NADH dehydrogenase [ubiquinone] 1 alpha subcomplex subunit 9, mitochondrial precursor	IPI00944067;IPI00120212	IPI00944067;IPI00120212	Q6GTD3	>IPI:IPI00944067.1|TREMBL:Q6GTD3|ENSEMBL:ENSMUSP00000085523|REFSEQ:NP_079634 Tax_Id=10090 Gene_Symbol=Ndufa9 NADH dehydrogenase [ubiquinone] 1 alpha subcomplex subunit 9, mitochondrial precursor;>IPI:IPI00120212.1|SWISS-PROT:Q9DC69 Tax_Id=10090 Gene_Symbol
2.90867	2.84487	2.96639	2.89805	3.29489	3.44246	3.29565	3.54183	3.25797	3.55101	2.99419	3.26073	2.62041	2.84236	3.15129	2.91911	3.31038	3.18471	2.83849	3.27837	3.11323	2.95701	3.17723	3.3583	363	0.00481828	5	11;11;11;10;4	17	11	Ywhaq	34 kDa protein	IPI00853924;IPI00408378;IPI00656269;IPI00754545	IPI00853924;IPI00408378;IPI00656269;IPI00754545;IPI00853781	A3KML3;F6VW30	>IPI:IPI00853924.1|ENSEMBL:ENSMUSP00000123605|VEGA:OTTMUSP00000017542 Tax_Id=10090 Gene_Symbol=Ywhaq 34 kDa protein;>IPI:IPI00408378.4|SWISS-PROT:P68254-1|TREMBL:A3KML3|ENSEMBL:ENSMUSP00000100067;ENSMUSP00000106604|REFSEQ:NP_035869|VEGA:OTTMUSP00000017541
2.39464	2.76266	2.36328	2.53704	1.69434	2.44738	2.47549	2.48441	3.28289	3.42971	2.8243	3.41355	3.27697	3.30622	7.7226	3.55518	4.72523	2.38107	3.12676	2.49657	1.24093	3.07012	2.06522	1.68628	364	0.0124278	3	12;11;9	12	11	Phyhipl	Isoform 1 of Phytanoyl-CoA hydroxylase-interacting protein-like	IPI00224093;IPI00938464;IPI00896093	IPI00224093;IPI00938464;IPI00896093	Q8BGT8-1	>IPI:IPI00224093.2|SWISS-PROT:Q8BGT8-1|ENSEMBL:ENSMUSP00000045807|REFSEQ:NP_848736 Tax_Id=10090 Gene_Symbol=Phyhipl Isoform 1 of Phytanoyl-CoA hydroxylase-interacting protein-like;>IPI:IPI00938464.1|REFSEQ:NP_001156318 Tax_Id=10090 Gene_Symbol=Phyhipl phyt
1.26267	1.8547	1.74569	2.39292	1.43236	1.49721	1.45353	1.42806	1.57126	1.88345	1.77885	1.47042	1.65953	2.12355	1.53278	1.73283	1.30161	1.72242	1.28245	1.42806	1.41477	1.27348	1.25033	1.37289	365	0.0462352	3	10;9;9	10	10	Tecr	Trans-2,3-enoyl-CoA reductase	IPI00262743;IPI00875068;IPI00929787	IPI00262743;IPI00875068;IPI00929787	Q9CY27	>IPI:IPI00262743.6|SWISS-PROT:Q9CY27|ENSEMBL:ENSMUSP00000019382|REFSEQ:NP_598879 Tax_Id=10090 Gene_Symbol=Tecr Trans-2,3-enoyl-CoA reductase;>IPI:IPI00875068.1|TREMBL:Q52L67 Tax_Id=10090 Gene_Symbol=Tecr Gpsn2 protein;>IPI:IPI00929787.1|TREMBL:Q14C44;Q3TAN
3.33034	2.99796	2.90622	2.89118	3.30918	3.21792	3.13126	3.11944	3.76775	3.51655	3.5868	3.7	2.84196	2.30208	3.52497	2.98516	3.21616	3.49089	3.91665	3.36791	2.52557	3.06307	3.06504	3.2533	366	0.0163322	4	10;6;5;1	10	10	Gstp1	Glutathione S-transferase P 1	IPI00555023;IPI00283531;IPI00408829	IPI00555023;IPI00283531;IPI00408829;IPI00121525	P19157	>IPI:IPI00555023.2|SWISS-PROT:P19157|ENSEMBL:ENSMUSP00000047790|REFSEQ:NP_038569 Tax_Id=10090 Gene_Symbol=Gstp1 Glutathione S-transferase P 1;>IPI:IPI00283531.8|SWISS-PROT:P46425|ENSEMBL:ENSMUSP00000038931|REFSEQ:NP_861461 Tax_Id=10090 Gene_Symbol=Gstp2 Gl
0.123516	0.0714235	0.0784745	0.0862218	0.0654536	0.0625508	0.0744768	0.0979624	0.0736594	0.0833542	0.10537	0.106725	0.108135	0.0680828	0.0713368	0.0711187	0.0807363	0.0905141	0.0691611	0.0802504	0.048384	0.0457456	0.071449	0.0599988	367	0.0297164	2	10;2	10	10	Rcc2	Protein RCC2	IPI00222509	IPI00222509;IPI00649648	Q8BK67	>IPI:IPI00222509.1|SWISS-PROT:Q8BK67|ENSEMBL:ENSMUSP00000038144;ENSMUSP00000071163|REFSEQ:NP_776292|VEGA:OTTMUSP00000010658 Tax_Id=10090 Gene_Symbol=Rcc2 Protein RCC2
1.4968	1.32279	1.2353	1.34693	0.992851	1.09293	0.868961	0.809651	0.975324	1.07924	0.948857	1.07739	1.01181	1.18614	1.09594	1.1227	1.07633	0.936067	1.51433	1.1076	1.14549	0.662559	0.922084	1.13368	368	0.0293417	8	10;6;6;6;4;4;2;2	10	1	Sept2; Nedd-5; Nedd5	Septin-2	IPI00114945;IPI00831059;IPI00831174;IPI00831525	IPI00114945;IPI00831059;IPI00831174;IPI00831525;IPI00831255;IPI00885929;IPI00831048;IPI00831621	P42208	>IPI:IPI00114945.1|SWISS-PROT:P42208|ENSEMBL:ENSMUSP00000027495|REFSEQ:NP_001153189;NP_001153191;NP_035021|VEGA:OTTMUSP00000024480 Tax_Id=10090 Gene_Symbol=Sept2 Septin-2;>IPI:IPI00831059.1|ENSEMBL:ENSMUSP00000120694|VEGA:OTTMUSP00000024489 Tax_Id=10090 Ge
3.05036	2.75847	2.15369	5.24384	4.16302	4.70898	5.10751	4.31351	5.1036	5.75175	4.38654	4.27478	2.8034	3.76166	2.58164	3.5832	4.09937	4.3535	3.2	4.182	4.26894	4.34537	3.42548	4.31481	369	0.0230181	4	8;8;8;8	8	1	Clta	Clathrin light chain A	IPI00114409;IPI00649453;IPI00828932;IPI00648658	IPI00114409;IPI00649453;IPI00828932;IPI00648658	O08585	>IPI:IPI00114409.1|SWISS-PROT:O08585 Tax_Id=10090 Gene_Symbol=Clta Clathrin light chain A;>IPI:IPI00649453.1|TREMBL:B1AWE1|ENSEMBL:ENSMUSP00000103479|VEGA:OTTMUSP00000007658 Tax_Id=10090 Gene_Symbol=Clta Clathrin light polypeptide;>IPI:IPI00828932.1|TREMBL
0.176894	0.297858	0.338926	0.33094	0.255833	0.245266	0.189394	0.250847	0.243885	0.317652	0.21675	0.222321	0.574086	0.348456	0.204357	0.329805	0.364432	0.444682	0.318715	0.385327	0.251718	0.197539	0.181891	0.246415	370	0.0344814	6	9;9;8;6;5;4	9	1	Ftl1;Ftl2	ferritin light chain 1	IPI00608020;IPI00762203;IPI00625129;IPI00228379;IPI00381328	IPI00608020;IPI00762203;IPI00625129;IPI00228379;IPI00381328;IPI00623155	Q3THE6;Q3TJJ6;Q3UCL5;Q3UL79	>IPI:IPI00608020.4|TREMBL:Q3THE6;Q3TJJ6;Q3UCL5;Q3UL79;Q3ULW5;Q9CPX4;Q9CWA4;Q9CZE7|ENSEMBL:ENSMUSP00000088372;ENSMUSP00000092002|REFSEQ:NP_034370;XP_001471658|VEGA:OTTMUSP00000025746 Tax_Id=10090 Gene_Symbol=Ftl1 ferritin light chain 1;>IPI:IPI00762203.2|SW
2.21848	2.18231	2.21396	2.75999	2.4322	3.30819	2.1277	2.25948	3.30164	3.4153	3.44959	3.27279	2.39183	3.5877	3.45841	3.56328	3.03324	2.69607	3.05138	3.01514	2.49831	2.52595	2.85861	3.19754	371	0.00773826	2	9;7	9	1	Rab6;Rab6a	Isoform 2 of Ras-related protein Rab-6A	IPI00230011;IPI00757748	IPI00230011;IPI00757748	P35279-2	>IPI:IPI00230011.3|SWISS-PROT:P35279-2|TREMBL:Q3U4W5|ENSEMBL:ENSMUSP00000095852|REFSEQ:NP_001157135|VEGA:OTTMUSP00000017761 Tax_Id=10090 Gene_Symbol=Rab6 Isoform 2 of Ras-related protein Rab-6A;>IPI:IPI00757748.1|TREMBL:D3YV69|ENSEMBL:ENSMUSP00000102663|VE
2.89654	3.31521	3.28666	4.26039	3.96369	4.17903	3.82629	3.57833	3.70055	3.56672	2.89486	2.77154	2.25632	3.15896	1.60277	2.24532	3.02261	3.77302	2.78956	2.95753	3.52386	3.20842	3.28915	3.84098	372	0.00331113	5	7;6;6;4;2	7	1	Crk	V-crk sarcoma virus CT10 oncogene homolog (Avian), isoform CRA_c	IPI00858058;IPI00857937;IPI00345994;IPI00885316	IPI00858058;IPI00857937;IPI00345994;IPI00885316;IPI00857756	Q8JZR2	>IPI:IPI00858058.1|TREMBL:Q8JZR2|ENSEMBL:ENSMUSP00000104063|VEGA:OTTMUSP00000030601 Tax_Id=10090 Gene_Symbol=Crk V-crk sarcoma virus CT10 oncogene homolog (Avian), isoform CRA_c;>IPI:IPI00857937.1|TREMBL:Q5ND50|ENSEMBL:ENSMUSP00000090803|VEGA:OTTMUSP000000
0.731904	0.832917	0.789578	0.933184	0.861475	0.919794	0.892379	0.924214	0.935016	0.993542	0.86783	0.918442	0.849473	0.718907	0.79783	0.828295	0.951837	0.96918	0.860807	0.968805	0.928247	0.822368	0.829394	0.926698	373	0.016023	4	37;34;27;17	37	0	Actg1	Actin, cytoplasmic 2	IPI00874482;IPI00652436;IPI00648420	IPI00874482;IPI00652436;IPI00648420;IPI00648161	P63260	>IPI:IPI00874482.1|SWISS-PROT:P63260|TREMBL:A1E281;Q3UD81;Q4KL81|ENSEMBL:ENSMUSP00000071486|REFSEQ:NP_033739|VEGA:OTTMUSP00000004544 Tax_Id=10090 Gene_Symbol=Actg1 Actin, cytoplasmic 2;>IPI:IPI00652436.3|TREMBL:Q3TSB7 Tax_Id=10090 Gene_Symbol=Actg1 Putativ
10.8607	6.16371	5.30279	6.80874	9.1391	9.39144	8.45809	5.77167	9.39408	9.38879	8.25764	10.1214	4.75376	5.78369	6.74855	7.122	6.7981	6.6234	9.29887	9.07688	8.12942	10.8686	10.5138	9.90197	374	0.0296492	1	48	48	40	Dpysl2	Dihydropyrimidinase-related protein 2	IPI00114375	IPI00114375	O08553	>IPI:IPI00114375.2|SWISS-PROT:O08553|ENSEMBL:ENSMUSP00000022629|REFSEQ:NP_034085|VEGA:OTTMUSP00000017622 Tax_Id=10090 Gene_Symbol=Dpysl2 Dihydropyrimidinase-related protein 2
1.54629	1.69526	1.61642	2.19843	2.10993	2.21499	2.20931	2.57818	2.1322	2.20468	2.18303	1.92604	2.17628	1.93506	2.09043	1.90578	2.08438	2.331	1.73289	1.92883	2.04968	2.19385	1.88232	1.96638	375	0.0419048	1	28	28	28	Got2	Aspartate aminotransferase, mitochondrial	IPI00117312	IPI00117312	P05202	>IPI:IPI00117312.1|SWISS-PROT:P05202|ENSEMBL:ENSMUSP00000034097|REFSEQ:NP_034455|VEGA:OTTMUSP00000017748 Tax_Id=10090 Gene_Symbol=Got2 Aspartate aminotransferase, mitochondrial
0.524329	0.763068	0.793462	0.909422	0.629564	0.700035	0.626802	0.828981	0.559691	0.6348	0.566861	0.534817	0.930406	0.853315	0.745657	0.81813	0.683153	0.796876	0.522193	0.681477	0.682361	0.534017	0.620424	0.623053	376	0.0264183	1	26	26	26	Cct3	T-complex protein 1 subunit gamma	IPI00116283	IPI00116283	P80318	>IPI:IPI00116283.1|SWISS-PROT:P80318|TREMBL:Q3TBM6;Q3U0I3;Q3U4U6;Q3UJP4;Q9R1U1|ENSEMBL:ENSMUSP00000001452|REFSEQ:NP_033966 Tax_Id=10090 Gene_Symbol=Cct3 T-complex protein 1 subunit gamma
2.21848	2.08542	2.43084	2.62116	3.10588	3.11915	3.49711	3.21471	2.85421	3.32779	2.98463	3.09924	2.99616	2.11968	3.13087	2.771	2.50063	2.52493	2.39006	2.93971	3.23593	2.69607	2.59309	3.35199	377	0.00589541	1	24	24	24	Sdha	Succinate dehydrogenase [ubiquinone] flavoprotein subunit, mitochondrial	IPI00230351	IPI00230351	Q8K2B3	>IPI:IPI00230351.1|SWISS-PROT:Q8K2B3|TREMBL:Q6IWE1|ENSEMBL:ENSMUSP00000022062|REFSEQ:NP_075770|VEGA:OTTMUSP00000039973 Tax_Id=10090 Gene_Symbol=Sdha Succinate dehydrogenase [ubiquinone] flavoprotein subunit, mitochondrial
5.82853	6.5028	5.20969	5.5063	7.49007	6.64584	7.14388	5.56917	7.92958	8.69716	7.27484	7.32923	5.46239	5.34616	6.21658	6.32151	5.92452	7.37735	5.56266	5.71363	5.99269	7.2406	7.58495	7.17823	378	0.00506987	1	21	21	21	Atp6v1c1	V-type proton ATPase subunit C 1	IPI00130186	IPI00130186	Q9Z1G3	>IPI:IPI00130186.4|SWISS-PROT:Q9Z1G3|TREMBL:Q3TG21;Q9D9Z4|ENSEMBL:ENSMUSP00000022904|REFSEQ:NP_079770 Tax_Id=10090 Gene_Symbol=Atp6v1c1 V-type proton ATPase subunit C 1
3.90396	4.01091	4.13206	3.8432	4.79616	5.70581	4.97958	4.79157	4.92393	5.41331	5.3376	4.98306	3.53845	3.9692	5.49058	4.32133	4.65766	5.54447	4.05088	4.86168	5.34702	5.92452	5.00325	4.87377	379	0.00782568	1	19	19	19	Idh3b	isocitrate dehydrogenase 3, beta subunit	IPI00126635	IPI00126635	Q91VA7	>IPI:IPI00126635.1|TREMBL:Q91VA7|ENSEMBL:ENSMUSP00000028892|REFSEQ:NP_570954|VEGA:OTTMUSP00000016536 Tax_Id=10090 Gene_Symbol=Idh3b isocitrate dehydrogenase 3, beta subunit
3.0373	3.4046	3.54334	3.48614	3.4009	3.85773	3.45042	3.52871	3.94555	3.87552	3.83627	3.77173	3.09933	2.97983	3.42724	3.7477	3.81083	4.02447	3.12266	3.6543	3.23238	3.32049	3.0526	3.16927	380	0.0188652	1	18	18	18	Acat1	Acetyl-CoA acetyltransferase, mitochondrial	IPI00154054	IPI00154054	Q8QZT1	>IPI:IPI00154054.1|SWISS-PROT:Q8QZT1|TREMBL:Q3TQP7|ENSEMBL:ENSMUSP00000034547|REFSEQ:NP_659033 Tax_Id=10090 Gene_Symbol=Acat1 Acetyl-CoA acetyltransferase, mitochondrial
2.22346	2.19044	2.13197	2.32088	2.24916	2.41016	2.38538	2.29258	2.16741	2.23414	2.08908	1.99394	2.42777	2.14994	2.25175	2.41791	2.33274	2.68947	2.47568	2.60308	2.34758	2.13493	2.44469	2.25104	381	0.00389114	1	21	21	15	Pgam1	Phosphoglycerate mutase 1	IPI00457898	IPI00457898	Q9DBJ1	>IPI:IPI00457898.3|SWISS-PROT:Q9DBJ1|TREMBL:Q3U7Z6;Q6NWV5|ENSEMBL:ENSMUSP00000011896|REFSEQ:NP_075907 Tax_Id=10090 Gene_Symbol=Pgam1 Phosphoglycerate mutase 1
4.04989	3.86937	4.42595	4.10796	4.41189	4.71453	4.83139	4.66483	4.8986	4.51019	4.91304	4.70278	3.00978	3.27611	4.84473	3.75474	3.94851	3.93778	4.06157	4.30886	4.67246	4.83699	4.4482	4.46748	382	0.00611621	1	15	15	15	Dlat	Dihydrolipoyllysine-residue acetyltransferase component of pyruvate dehydrogenase complex, mitochondrial	IPI00153660	IPI00153660	Q8BMF4	>IPI:IPI00153660.4|SWISS-PROT:Q8BMF4|TREMBL:Q99LL2|ENSEMBL:ENSMUSP00000034567|REFSEQ:NP_663589|VEGA:OTTMUSP00000017759 Tax_Id=10090 Gene_Symbol=Dlat Dihydrolipoyllysine-residue acetyltransferase component of pyruvate dehydrogenase complex, mitochondrial
8.85034	4.98878	4.40801	4.74518	5.68021	5.08984	7.11997	4.68472	6.23869	6.62866	6.51042	6.61901	3.02151	3.42947	5.21349	5.3183	5.24027	4.77099	4.36776	4.00192	5.0005	6.39509	9.90393	8.41326	383	0.0299048	1	15	15	15	Sv2a	Synaptic vesicle glycoprotein 2A	IPI00465810	IPI00465810	Q9JIS5	>IPI:IPI00465810.3|SWISS-PROT:Q9JIS5|ENSEMBL:ENSMUSP00000037576|REFSEQ:NP_071313|VEGA:OTTMUSP00000024563 Tax_Id=10090 Gene_Symbol=Sv2a Synaptic vesicle glycoprotein 2A
0.145613	0.292423	0.271636	0.275459	0.172268	0.189097	0.128223	0.194882	0.200799	0.219385	0.146875	0.164509	0.401027	0.237389	0.212938	0.264347	0.253473	0.273545	0.256483	0.218126	0.174441	0.134497	0.169973	0.220902	384	0.0233453	1	14	17	14	Tpm4	Tropomyosin alpha-4 chain	IPI00421223	IPI00421223	Q6IRU2	>IPI:IPI00421223.3|SWISS-PROT:Q6IRU2|ENSEMBL:ENSMUSP00000003575|REFSEQ:NP_001001491|VEGA:OTTMUSP00000025721 Tax_Id=10090 Gene_Symbol=Tpm4 Tropomyosin alpha-4 chain
6.16257	8.16993	10.1353	7.59071	8.85348	9.01225	8.00833	8.73744	6.32711	7.33783	6.87994	7.32654	5.39316	5.69347	7.72141	7.39153	8.15461	9.05879	5.38242	9.14495	9.09009	8.54044	9.96413	9.64878	385	0.0446528	1	14	14	14	Marcks	Myristoylated alanine-rich C-kinase substrate	IPI00229534	IPI00229534	P26645	>IPI:IPI00229534.5|SWISS-PROT:P26645|TREMBL:Q05BL6|ENSEMBL:ENSMUSP00000090245|REFSEQ:NP_032564 Tax_Id=10090 Gene_Symbol=Marcks Myristoylated alanine-rich C-kinase substrate
0.425351	0.662164	0.639795	0.843739	0.531378	0.64119	0.562588	0.656599	0.542005	0.556917	0.520562	0.463392	1.28146	0.759532	0.603682	0.697593	0.593824	0.585583	0.414938	0.627707	0.516556	0.455809	0.543774	0.485625	386	0.0467024	1	14	14	14	Eif4b	Eukaryotic translation initiation factor 4B	IPI00221581	IPI00221581	Q8BGD9	>IPI:IPI00221581.1|SWISS-PROT:Q8BGD9|TREMBL:B2RWE8;Q3TDD8;Q3THB0;Q3TLQ9;Q3TSY9;Q3UGC0;Q922K6|ENSEMBL:ENSMUSP00000077705|REFSEQ:NP_663600 Tax_Id=10090 Gene_Symbol=Eif4b Eukaryotic translation initiation factor 4B
2.69143	2.87737	2.69978	3.47741	3.95554	3.98026	4.33201	3.75996	4.26021	4.61446	3.80894	4.58989	2.70139	3.23447	3.53045	3.51235	3.05689	4.43715	3.47283	2.82965	3.32027	4.37311	4.00416	4.20893	387	0.00275819	1	11	11	11	Idh3g	Isocitrate dehydrogenase [NAD] subunit gamma, mitochondrial	IPI00109169	IPI00109169	P70404	>IPI:IPI00109169.1|SWISS-PROT:P70404|TREMBL:Q3TGZ3;Q3TKM5;Q684I8;Q9CW65|ENSEMBL:ENSMUSP00000056502|REFSEQ:NP_032349|VEGA:OTTMUSP00000019257 Tax_Id=10090 Gene_Symbol=Idh3g Isocitrate dehydrogenase [NAD] subunit gamma, mitochondrial
0.667913	0.909339	0.9298	1.02216	0.769053	0.923276	0.821085	0.917852	0.595841	0.700329	0.638651	0.602627	1.00529	0.851499	0.83668	0.740851	0.910415	0.982898	0.721397	0.816793	0.73303	0.693529	0.827678	0.646037	388	0.00849576	1	11	11	11	Asna1	ATPase Asna1	IPI00624501	IPI00624501	O54984	>IPI:IPI00624501.2|SWISS-PROT:O54984|TREMBL:Q8C1Q1;Q8VEI6|ENSEMBL:ENSMUSP00000065337|REFSEQ:NP_062626 Tax_Id=10090 Gene_Symbol=Asna1 ATPase Asna1
3.18319	3.26808	3.07465	3.83362	4.69947	4.38059	4.23352	4.45971	4.05679	4.44978	4.4238	3.92866	3.78931	3.74658	3.30469	3.46717	3.63517	5.14695	3.81199	3.21275	4.09584	4.30533	4.10526	3.95507	389	0.0069541	1	10	10	10	Sod2	Superoxide dismutase [Mn], mitochondrial	IPI00109109	IPI00109109	P09671	>IPI:IPI00109109.1|SWISS-PROT:P09671|TREMBL:Q3TJA2;Q3U8W4;Q4FJX9|ENSEMBL:ENSMUSP00000007012|REFSEQ:NP_038699 Tax_Id=10090 Gene_Symbol=Sod2 Superoxide dismutase [Mn], mitochondrial
4.4619	2.49209	4.68231	3.8619	5.4136	5.3217	5.77935	5.0574	4.49641	4.86357	4.79524	6.5647	2.59437	4.19956	4.64274	4.33783	4.32003	5.04974	4.91183	4.40703	4.78217	5.8524	5.78637	5.64653	390	0.0259548	1	10	10	10	Atp6v0d1	V-type proton ATPase subunit d 1	IPI00313841	IPI00313841	P51863	>IPI:IPI00313841.1|SWISS-PROT:P51863|TREMBL:Q921S5|ENSEMBL:ENSMUSP00000013304|REFSEQ:NP_038505|VEGA:OTTMUSP00000043007 Tax_Id=10090 Gene_Symbol=Atp6v0d1 V-type proton ATPase subunit d 1
3.07172	3.64977	3.46741	3.64299	3.82409	4.42243	4.93974	4.91546	4.52899	4.78996	3.97804	3.37132	3.16897	3.72107	4.52018	3.7294	3.88078	4.5583	3.98517	3.6299	4.64987	4.00625	4.40335	4.57226	391	0.0389834	1	10	10	10	Cox5a	Cytochrome c oxidase subunit 5A, mitochondrial	IPI00120719	IPI00120719	P12787	>IPI:IPI00120719.4|SWISS-PROT:P12787|ENSEMBL:ENSMUSP00000000090|REFSEQ:NP_031773 Tax_Id=10090 Gene_Symbol=Cox5a Cytochrome c oxidase subunit 5A, mitochondrial
0.460872	0.820345	0.762137	0.903016	0.752729	0.661376	0.655996	0.88347	0.588997	0.689465	0.5002	0.47694	0.863409	0.697447	0.732332	0.869943	0.784129	0.902772	0.878735	0.914077	0.577834	0.459284	0.740905	0.753523	392	0.0417284	1	10	10	10	Numa1	nuclear mitotic apparatus protein 1	IPI00263048	IPI00263048	Q3TH77;Q3UNM2;Q80Y35;Q91W16;Q99KG8	>IPI:IPI00263048.2|TREMBL:Q3TH77;Q3UNM2;Q80Y35;Q91W16;Q99KG8|ENSEMBL:ENSMUSP00000081912|REFSEQ:NP_598708 Tax_Id=10090 Gene_Symbol=Numa1 nuclear mitotic apparatus protein 1
0.539374	0.723851	0.772439	0.83375	0.538619	0.632031	0.527593	0.608495	0.565099	0.616713	0.561956	0.531915	0.713878	0.59453	0.636659	0.647082	0.75683	0.812216	0.58418	0.772499	0.601359	0.56744	0.634196	0.577634	393	0.0222824	1	9	9	9	Ahsa1	Activator of 90 kDa heat shock protein ATPase homolog 1	IPI00153740	IPI00153740	Q8BK64	>IPI:IPI00153740.1|SWISS-PROT:Q8BK64|TREMBL:Q3TL79|ENSEMBL:ENSMUSP00000021425|REFSEQ:NP_666148 Tax_Id=10090 Gene_Symbol=Ahsa1 Activator of 90 kDa heat shock protein ATPase homolog 1
2.86	3.44305	2.28212	1.76298	3.30371	3.62924	3.80749	4.57017	3.36678	3.37177	3.34616	3.14911	3.16046	3.99521	3.32381	4.59031	3.51556	3.93949	2.6488	2.52474	4.05416	3.22435	3.83656	3.91038	394	0.0286482	1	9	9	9	Ppme1	Protein phosphatase methylesterase 1	IPI00415908	IPI00415908	Q8BVQ5	>IPI:IPI00415908.4|SWISS-PROT:Q8BVQ5|ENSEMBL:ENSMUSP00000032963|REFSEQ:NP_082568 Tax_Id=10090 Gene_Symbol=Ppme1 Protein phosphatase methylesterase 1
3.25351	2.83865	3.34459	3.46117	3.86802	2.97133	3.21357	4.49499	3.00111	3.2803	3.06391	3.06504	3.64432	3.62661	4.74046	4.33369	4.496	4.55456	3.22706	3.42759	3.09789	3.44305	3.15916	3.05204	395	0.0313773	1	9	9	9	Pafah1b2	Platelet-activating factor acetylhydrolase IB subunit beta	IPI00118821	IPI00118821	Q61206	>IPI:IPI00118821.2|SWISS-PROT:Q61206|TREMBL:Q8BTA2|ENSEMBL:ENSMUSP00000003215|REFSEQ:NP_032801 Tax_Id=10090 Gene_Symbol=Pafah1b2 Platelet-activating factor acetylhydrolase IB subunit beta
0.8	1.11909	1.16272	1.09528	0.808996	0.990786	0.860956	1.00874	0.759647	0.837942	0.773634	0.69847	1.62628	1.07718	0.944198	1.10269	0.666711	0.867754	0.842531	0.823452	0.944198	0.73062	1.02365	0.998602	396	0.0104375	1	8	8	8	2610301G19Rik;Ccar2	Protein KIAA1967 homolog	IPI00123624	IPI00123624	Q8VDP4	>IPI:IPI00123624.8|SWISS-PROT:Q8VDP4|ENSEMBL:ENSMUSP00000036924|REFSEQ:NP_666167 Tax_Id=10090 Gene_Symbol=2610301G19Rik Protein KIAA1967 homolog
0.469175	0.692185	0.689988	0.767754	0.475082	0.573723	0.51406	0.520888	0.491787	0.515437	0.476553	0.44829	0.601902	0.770713	0.573625	0.677599	0.647626	0.638366	0.521241	0.593613	0.489884	0.482183	0.444208	0.506842	397	0.00323938	1	7	7	7	Alad	Delta-aminolevulinic acid dehydratase	IPI00112719	IPI00112719	P10518	>IPI:IPI00112719.1|SWISS-PROT:P10518|TREMBL:O89061;Q8VCZ1;Q9DD05|ENSEMBL:ENSMUSP00000030090;ENSMUSP00000103068|REFSEQ:NP_032551|VEGA:OTTMUSP00000009376;OTTMUSP00000009377 Tax_Id=10090 Gene_Symbol=Alad Delta-aminolevulinic acid dehydratase
1.32485	1.5758	1.42716	1.62522	1.53556	1.32414	1.34593	1.6503	1.24465	1.45012	1.31311	1.14658	2.07348	1.7744	1.62161	1.76261	1.75846	1.65049	1.50505	1.57228	1.7723	1.08059	1.55374	1.50211	398	0.0215616	1	7	7	7	Aldh9a1	4-trimethylaminobutyraldehyde dehydrogenase	IPI00124372	IPI00124372	Q9JLJ2	>IPI:IPI00124372.3|SWISS-PROT:Q9JLJ2|TREMBL:A7VL18;Q3TG52;Q3THE7;Q3TMT4;Q3U367;Q3UDG0;Q3V1N7;Q9CRH9|ENSEMBL:ENSMUSP00000028004|REFSEQ:NP_064377 Tax_Id=10090 Gene_Symbol=Aldh9a1 4-trimethylaminobutyraldehyde dehydrogenase
2.24261	2.06411	1.98507	3.19285	2.72487	3.07844	2.72487	2.95569	2.43754	3.23206	1.98981	2.26096	2.39429	2.25251	2.33967	2.46907	2.23125	3.22622	2.59081	2.50138	3.61024	2.99913	3.42642	2.93971	399	0.035621	1	7	10	7	Cfl2	Cofilin-2	IPI00266188	IPI00266188	P45591	>IPI:IPI00266188.6|SWISS-PROT:P45591|TREMBL:Q3UHW9|ENSEMBL:ENSMUSP00000077262|REFSEQ:NP_031714 Tax_Id=10090 Gene_Symbol=Cfl2 Cofilin-2
1.87098	1.83264	2.20473	2.35888	2.28964	2.16722	1.72473	1.7805	2.14772	2.2245	1.75898	2.00437	2.54155	2.39854	2.47451	2.18632	2.15722	2.67051	2.68774	2.20712	2.00172	2.01658	1.71931	2.1277	400	0.0360502	1	7	7	7	Hadh	Hydroxyacyl-coenzyme A dehydrogenase, mitochondrial	IPI00121105	IPI00121105	Q61425	>IPI:IPI00121105.2|SWISS-PROT:Q61425|ENSEMBL:ENSMUSP00000029610|REFSEQ:NP_032238|VEGA:OTTMUSP00000036612 Tax_Id=10090 Gene_Symbol=Hadh Hydroxyacyl-coenzyme A dehydrogenase, mitochondrial
3.08356	3.59648	3.35065	3.87087	2.67208	2.31857	2.46354	2.40523	3.00111	3.32347	2.77024	2.91962	3.2	3.18431	2.94933	2.92594	3.15437	2.46822	2.61643	3.15637	2.73351	2.76373	3.57923	2.57579	401	0.00449205	1	8	12	6	Gna11	Guanine nucleotide-binding protein subunit alpha-11	IPI00121387	IPI00121387	P21278	>IPI:IPI00121387.1|SWISS-PROT:P21278|TREMBL:Q3UPA1;Q91X95|ENSEMBL:ENSMUSP00000043190|REFSEQ:NP_034431|VEGA:OTTMUSP00000039227 Tax_Id=10090 Gene_Symbol=Gna11 Guanine nucleotide-binding protein subunit alpha-11
0.129862	0.182685	0.184291	0.200156	0.183807	0.216521	0.218441	0.318127	0.224065	0.2459	0.211171	0.189516	0.219549	0.217998	0.229563	0.215554	0.261329	0.295867	0.271946	0.227842	0.189412	0.150855	0.171636	0.19223	402	0.00455135	1	6	6	6	Rpl18	60S ribosomal protein L18	IPI00555113	IPI00555113	P35980	>IPI:IPI00555113.2|SWISS-PROT:P35980|TREMBL:Q0QEW9;Q58EW0;Q642K1|ENSEMBL:ENSMUSP00000072320;ENSMUSP00000103365|REFSEQ:NP_033103|VEGA:OTTMUSP00000026911 Tax_Id=10090 Gene_Symbol=Rpl18 60S ribosomal protein L18
1.82983	1.99728	2.39074	1.56199	2.16118	1.86933	1.92223	2.06237	1.76847	1.69213	1.48135	1.62114	1.47682	1.25455	0.920133	1.29064	1.79176	2.23125	1.35256	2.33667	1.67316	1.90971	1.77001	1.68523	403	0.00337933	1	5	5	5	Clpp	Putative ATP-dependent Clp protease proteolytic subunit, mitochondrial	IPI00133270	IPI00133270	O88696	>IPI:IPI00133270.1|SWISS-PROT:O88696|TREMBL:Q3UGW4;Q8CF81|ENSEMBL:ENSMUSP00000002735|REFSEQ:NP_059089 Tax_Id=10090 Gene_Symbol=Clpp Putative ATP-dependent Clp protease proteolytic subunit, mitochondrial
0.430478	0.542035	0.561545	0.803794	0.460384	0.536653	0.444504	0.59891	0.510803	0.35713	0.354912	0.381636	0.696573	0.584454	0.489069	0.563857	0.660502	0.57971	0.4638	0.57435	0.519238	0.359738	0.459939	0.497265	404	0.0386965	1	5	5	5	Gtpbp1	GTP-binding protein 1	IPI00761677	IPI00761677	O08582	>IPI:IPI00761677.1|SWISS-PROT:O08582|ENSEMBL:ENSMUSP00000043575|REFSEQ:NP_038846 Tax_Id=10090 Gene_Symbol=Gtpbp1 GTP-binding protein 1
0.33151	0.505204	0.525624	0.577767	0.328591	0.355859	0.293376	0.361755	0.294395	0.37508	0.411286	0.312989	0.548817	0.66291	0.342513	0.50656	0.285518	0.436719	0.213224	0.402123	0.389499	0.313735	0.359699	0.178199	405	0.0477799	1	5	5	5	Hebp1	Heme-binding protein 1	IPI00135085	IPI00135085	Q9R257	>IPI:IPI00135085.4|SWISS-PROT:Q9R257|ENSEMBL:ENSMUSP00000042232|REFSEQ:NP_038574|VEGA:OTTMUSP00000028719 Tax_Id=10090 Gene_Symbol=Hebp1 Heme-binding protein 1
4.42048	4.6516	6.05914	7.0922	5.14218	5.42653	5.02513	6.33112	3.85416	3.76407	5.42977	3.75291	11.1586	7.24113	6.7236	7.08065	5.96837	4.89069	6.76361	5.59065	5.39113	3.20164	5.95664	4.54876	406	0.00603419	1	4	4	4	Mpc2; Brp44	Brain protein 44	IPI00131896	IPI00131896	Q9D023	>IPI:IPI00131896.1|SWISS-PROT:Q9D023|ENSEMBL:ENSMUSP00000027853|REFSEQ:NP_081706|VEGA:OTTMUSP00000025749 Tax_Id=10090 Gene_Symbol=Brp44 Brain protein 44
1.72348	2.30824	1.82555	2.33252	2.20148	2.62722	2.319	2.1169	2.2307	2.6976	2.56437	2.29848	2.78211	2.47924	2.41996	3.06288	2.30979	1.42572	1.66825	2.04449	2.53659	2.17836	2.1378	2.43914	407	0.0114059	1	4	4	4	Mtpn	Myotrophin	IPI00228583	IPI00228583	P62774	>IPI:IPI00228583.5|SWISS-PROT:P62774|ENSEMBL:ENSMUSP00000031866|REFSEQ:NP_032124|VEGA:OTTMUSP00000028722 Tax_Id=10090 Gene_Symbol=Mtpn Myotrophin
1.63926	2.37699	2.22519	1.88108	1.74663	2.02253	1.87007	1.79282	1.94624	1.86202	1.94553	1.85867	2.88717	2.33661	2.04859	2.57467	1.90505	1.66486	1.58283	2.09472	1.83793	1.36346	2.0622	2.03488	408	0.0381928	1	4	4	4	Sh3bgrl	SH3 domain-binding glutamic acid-rich-like protein	IPI00122265	IPI00122265	Q9JJU8	>IPI:IPI00122265.1|SWISS-PROT:Q9JJU8|TREMBL:Q3U9A8|ENSEMBL:ENSMUSP00000033598|REFSEQ:NP_064373|VEGA:OTTMUSP00000019899 Tax_Id=10090 Gene_Symbol=Sh3bgrl SH3 domain-binding glutamic acid-rich-like protein
3.29576	2.46981	3.11876	2.61766	2.84965	3.34952	3.14436	2.95055	NaN	2.50759	NaN	2.41453	NaN	1.96194	NaN	2.26219	NaN	3.10039	NaN	4.06537	3.60815	NaN	3.43501	3.33411	409	0.00214605	1	3	3	3	Capn5	Calpain-5	IPI00114962	IPI00114962	O08688	>IPI:IPI00114962.1|SWISS-PROT:O08688|TREMBL:Q3TDS7;Q3TPL4;Q3U2P3;Q3UTF3|ENSEMBL:ENSMUSP00000048183;ENSMUSP00000102729|REFSEQ:NP_031628|VEGA:OTTMUSP00000025702;OTTMUSP00000025703 Tax_Id=10090 Gene_Symbol=Capn5 Calpain-5
0.391252	0.501404	0.438924	0.42398	0.474654	0.481835	0.471364	0.447307	0.361925	0.38625	0.279986	0.270658	0.590458	0.465181	0.425405	0.423693	0.429019	0.483606	0.458505	0.403242	0.311546	0.280175	0.414903	0.422565	410	0.00336408	1	3	3	3	Emb	Embigin	IPI00129968	IPI00129968	P21995	>IPI:IPI00129968.2|SWISS-PROT:P21995|TREMBL:Q3TI59;Q3TSZ8;Q3UFK0|ENSEMBL:ENSMUSP00000022242|REFSEQ:NP_034460|VEGA:OTTMUSP00000016379 Tax_Id=10090 Gene_Symbol=Emb Embigin
2.43167	3.6507	4.95737	NaN	3.98581	5.08673	4.59052	5.37837	4.41112	3.68066	3.12999	2.58278	7.52502	6.29445	NaN	5.29829	4.6365	4.19358	4.84027	3.48809	3.68324	2.84269	3.90717	4.78469	411	0.0169422	1	3	3	3	6720456B07Rik;Brk1	Probable protein BRICK1	IPI00127176	IPI00127176	Q91VR8	>IPI:IPI00127176.3|SWISS-PROT:Q91VR8|ENSEMBL:ENSMUSP00000041644|REFSEQ:NP_598698 Tax_Id=10090 Gene_Symbol=6720456B07Rik Probable protein BRICK1
0.824402	1.19499	0.987557	0.74985	1.35737	1.44338	1.50143	1.38771	1.42351	1.34438	1.13591	1.42723	1.39747	1.1498	1.30615	1.40594	1.10334	0.819874	1.27737	1.58484	1.38221	1.13326	1.52474	1.23241	412	0.0190809	1	3	3	3	Atp6v1g1	V-type proton ATPase subunit G 1	IPI00133163	IPI00133163	Q9CR51	>IPI:IPI00133163.3|SWISS-PROT:Q9CR51|TREMBL:Q3U7E0;Q5HZY7|ENSEMBL:ENSMUSP00000048770|REFSEQ:NP_077135|VEGA:OTTMUSP00000000360 Tax_Id=10090 Gene_Symbol=Atp6v1g1 V-type proton ATPase subunit G 1
1.46413	NaN	1.79144	1.57193	NaN	2.12798	1.74207	NaN	NaN	2.2625	NaN	NaN	1.6854	1.64739	1.84829	1.89279	2.33973	NaN	NaN	2.11417	1.82842	NaN	1.97484	2.12947	413	0.0234402	1	3	3	3	Prkra	Interferon-inducible double stranded RNA-dependent protein kinase activator A	IPI00471256	IPI00471256	Q9WTX2	>IPI:IPI00471256.2|SWISS-PROT:Q9WTX2|TREMBL:A2ATI5|ENSEMBL:ENSMUSP00000002808|REFSEQ:NP_036001|VEGA:OTTMUSP00000014121 Tax_Id=10090 Gene_Symbol=Prkra Interferon-inducible double stranded RNA-dependent protein kinase activator A
0.385639	0.466592	0.37919	0.302288	0.417031	0.373762	0.354108	0.447828	0.433238	0.569314	0.343772	0.395101	0.61121	0.512321	0.556917	0.550479	0.410593	0.46421	0.470522	0.436738	0.407083	0.322674	0.461233	0.53135	414	0.036799	1	3	44	3	Pkm; Pk3; Pkm2; Pykm	Isoform M2 of Pyruvate kinase isozymes M1/M2	IPI00407130	IPI00407130	P52480-1	>IPI:IPI00407130.4|SWISS-PROT:P52480-1|ENSEMBL:ENSMUSP00000034834|REFSEQ:NP_035229 Tax_Id=10090 Gene_Symbol=Pkm2 Isoform M2 of Pyruvate kinase isozymes M1/M2
2.2042	2.32704	3.29164	2.51004	3.07333	3.27654	3.1026	3.45781	3.1504	3.57679	3.53344	3.06288	3.15219	2.90343	2.97186	2.66468	3.6152	3.9093	3.67471	3.30907	3.00978	3.63134	3.11672	2.49116	415	0.0065551	1	2	2	2	Mtatp8; Atp8; mt-Atp8	ATP synthase protein 8	IPI00116896	IPI00116896	P03930	>IPI:IPI00116896.1|SWISS-PROT:P03930|TREMBL:A3R404;Q7JCZ0|ENSEMBL:ENSMUSP00000080995|REFSEQ:NP_904332 Tax_Id=10090 Gene_Symbol=mt-Atp8 ATP synthase protein 8
0.278311	0.374406	0.377188	0.341297	0.226871	0.285372	0.241173	0.405252	0.308718	0.274409	0.27571	0.299285	0.348858	NaN	0.453206	0.498057	0.385431	0.433388	0.394213	0.321989	0.259195	0.164109	0.268601	0.296665	416	0.00733142	1	2	2	2	Sf3b5	Splicing factor 3B subunit 5	IPI00311948	IPI00311948	Q923D4	>IPI:IPI00311948.3|SWISS-PROT:Q923D4|TREMBL:Q8CEW9|ENSEMBL:ENSMUSP00000100771|REFSEQ:NP_780311 Tax_Id=10090 Gene_Symbol=Sf3b5 Splicing factor 3B subunit 5
0.882379	1.07495	1.17314	0.899038	0.767342	0.921489	0.803084	1.1928	1.29104	1.82392	1.64943	1.33025	1.423	0.756315	0.69847	1.03129	0.947418	0.797448	0.441384	0.821895	0.748111	0.979144	0.956938	1.07674	417	0.010606	1	2	2	2	Marcksl1	MARCKS-related protein	IPI00281011	IPI00281011	P28667	>IPI:IPI00281011.7|SWISS-PROT:P28667|TREMBL:B2KGE6|ENSEMBL:ENSMUSP00000055637|REFSEQ:NP_034937|VEGA:OTTMUSP00000010174;OTTMUSP00000042918 Tax_Id=10090 Gene_Symbol=Marcksl1 MARCKS-related protein
0.64189	0.630636	0.805023	0.772738	0.472456	0.567698	0.552029	0.563031	0.478469	0.606281	0.453515	0.472813	0.913075	0.625665	0.453268	0.594248	0.473619	0.522139	0.394042	0.532198	0.42633	0.301559	0.618774	0.466222	418	0.0262763	1	2	2	2	Aacs	Acetoacetyl-CoA synthetase	IPI00135189	IPI00135189	Q9D2R0	>IPI:IPI00135189.3|SWISS-PROT:Q9D2R0|TREMBL:Q8K3J7|ENSEMBL:ENSMUSP00000031445|REFSEQ:NP_084486|VEGA:OTTMUSP00000027664 Tax_Id=10090 Gene_Symbol=Aacs Acetoacetyl-CoA synthetase
0.473037	NaN	1.0209	0.700869	0.517438	0.694493	NaN	0.648887	0.591646	0.670376	0.564048	0.647375	1.06483	0.943841	0.87943	0.6595	0.841255	0.626253	0.591296	0.696767	0.543419	0.45403	0.557818	0.588097	419	0.0470108	1	2	2	2	Fam195b	Protein FAM195B	IPI00114944	IPI00114944	Q3UGS4	>IPI:IPI00114944.3|SWISS-PROT:Q3UGS4|ENSEMBL:ENSMUSP00000034913;ENSMUSP00000074544|REFSEQ:NP_001028403|VEGA:OTTMUSP00000004663 Tax_Id=10090 Gene_Symbol=Fam195b Protein FAM195B
3.84084	3.92019	4.57164	2.17874	7.24796	6.27786	6.09236	4.06752	3.332	2.60105	3.23583	3.2477	1.91117	4.24358	4.30608	2.92406	4.10357	3.93949	3.04173	4.48069	4.89596	4.0122	4.23263	4.79019	420	0.0171958	1	30	30	1	Cadps	Isoform 2 of Calcium-dependent secretion activator 1	IPI00330163	IPI00330163	Q80TJ1-2	>IPI:IPI00330163.4|SWISS-PROT:Q80TJ1-2|ENSEMBL:ENSMUSP00000064706|REFSEQ:NP_036191 Tax_Id=10090 Gene_Symbol=Cadps Isoform 2 of Calcium-dependent secretion activator 1
1.60555	1.70518	1.62393	1.48533	1.47215	1.36054	1.15772	1.43162	1.4493	1.50092	1.26704	1.35391	1.2521	1.50365	1.64349	1.28951	1.37855	1.39287	1.54899	1.29924	1.18533	1.02053	1.36416	1.28513	421	0.0237728	1	7	7	1	Rap1a	Ras-related protein Rap-1A	IPI00138406	IPI00138406	P62835	>IPI:IPI00138406.1|SWISS-PROT:P62835|TREMBL:C5H0E8;C5H0E9;Q3U7U8;Q3V3W9|ENSEMBL:ENSMUSP00000088174|REFSEQ:NP_663516 Tax_Id=10090 Gene_Symbol=Rap1a Ras-related protein Rap-1A
0.436681	1.43585	0.517706	0.261862	NaN	NaN	NaN	NaN	0.338352	0.16576	0.156656	0.195538	NaN	NaN	NaN	NaN	0.517277	0.0783638	NaN	0.324097	0.362083	0.512584	1.19459	0.271813	422	0.161111	2	5;4	5	5	Dut	deoxyuridine triphosphatase isoform 1	IPI00187434;IPI00467266	IPI00187434;IPI00467266	Q8VCG1;Q9JJ44	>IPI:IPI00187434.1|TREMBL:Q8VCG1;Q9JJ44|ENSEMBL:ENSMUSP00000080767|REFSEQ:NP_001153118|VEGA:OTTMUSP00000016347 Tax_Id=10090 Gene_Symbol=Dut deoxyuridine triphosphatase isoform 1;>IPI:IPI00467266.1|TREMBL:Q9CQ43|ENSEMBL:ENSMUSP00000057854|REFSEQ:NP_076084|V
0.143964	0.268882	0.253261	0.303684	NaN	NaN	NaN	NaN	NaN	NaN	NaN	NaN	0.373065	0.257812	0.208834	0.191234	0.203774	NaN	0.233116	0.174691	0.186745	NaN	0.104283	0.129256	423	0.0829703	5	4;4;3;3;2	4	4	Hmbs	porphobilinogen deaminase isoform 1	IPI00408022;IPI00877259;IPI00133589;IPI00230382;IPI00668725	IPI00408022;IPI00877259;IPI00133589;IPI00230382;IPI00668725	Q3TIV0;Q3UBC6;Q99L41	>IPI:IPI00408022.4|TREMBL:Q3TIV0;Q3UBC6;Q99L41|ENSEMBL:ENSMUSP00000076575|REFSEQ:NP_038579 Tax_Id=10090 Gene_Symbol=Hmbs porphobilinogen deaminase isoform 1;>IPI:IPI00877259.1|TREMBL:Q3UPG1|REFSEQ:NP_001103721 Tax_Id=10090 Gene_Symbol=Hmbs porphobilinogen
15.9602	3.87177	2.54091	4.28761	7.62369	NaN	11.355	4.55643	5.90493	NaN	5.34473	2.07005	2.89436	5.30026	4.07067	5.65419	4.69616	3.02206	3.98565	3.114	NaN	NaN	NaN	NaN	424	0.474012	2	10;7	10	10	Atp6v1g2	V-type proton ATPase subunit G 2	IPI00123817;IPI00895346	IPI00123817;IPI00895346	Q9WTT4	>IPI:IPI00123817.1|SWISS-PROT:Q9WTT4|TREMBL:Q54A87|ENSEMBL:ENSMUSP00000069482|REFSEQ:NP_075668|VEGA:OTTMUSP00000041326 Tax_Id=10090 Gene_Symbol=Atp6v1g2 V-type proton ATPase subunit G 2;>IPI:IPI00895346.1|TREMBL:B0V2H4|ENSEMBL:ENSMUSP00000113511|VEGA:OTTMU
NaN	NaN	NaN	NaN	NaN	4.66744	5.31774	5.2997	4.46269	5.78905	4.72523	5.13532	5.8872	4.29812	NaN	NaN	NaN	5.09814	NaN	4.1941	9.86777	6.62822	7.98786	4.35825	425	0.21694	5	2;2;2;2;1	2	2	Baiap2	Isoform 1 of Brain-specific angiogenesis inhibitor 1-associated protein 2	IPI00222731;IPI00124778;IPI00648827;IPI00649474;IPI00459465	IPI00222731;IPI00124778;IPI00648827;IPI00649474;IPI00459465	Q8BKX1-1	>IPI:IPI00222731.2|SWISS-PROT:Q8BKX1-1|TREMBL:B1AZ47|ENSEMBL:ENSMUSP00000026436|REFSEQ:NP_001032844|VEGA:OTTMUSP00000004381 Tax_Id=10090 Gene_Symbol=Baiap2 Isoform 1 of Brain-specific angiogenesis inhibitor 1-associated protein 2;>IPI:IPI00124778.1|SWISS-P
1.23723	2.09446	2.60369	1.91421	NaN	NaN	NaN	NaN	NaN	NaN	NaN	NaN	3.39905	2.66795	2.07422	2.22554	NaN	NaN	NaN	NaN	2.33705	1.80401	2.16366	1.85096	426	0.226012	1	3	3	3	Arfgef2	ADP-ribosylation factor guanine nucleotide-exchange factor 2	IPI00137087	IPI00137087	A2A5R2;Q3U2F2;Q3U5C3	>IPI:IPI00137087.5|TREMBL:A2A5R2;Q3U2F2;Q3U5C3|ENSEMBL:ENSMUSP00000096677|REFSEQ:NP_001078964|VEGA:OTTMUSP00000001103 Tax_Id=10090 Gene_Symbol=Arfgef2 ADP-ribosylation factor guanine nucleotide-exchange factor 2
2.24669	3.25341	1.67437	2.94959	NaN	2.80536	NaN	2.6773	NaN	NaN	NaN	NaN	NaN	3.84674	3.41962	3.88667	4.424	2.68853	2.63713	1.77311	3.37986	2.76129	1.34862	3.1347	427	0.509788	9	11;11;11;11;11;11;11;4;1	13	8	Dst	Isoform 4 of Bullous pemphigoid antigen 1	IPI00230692;IPI00284272;IPI00762553;IPI00230690;IPI00874946;IPI00874675;IPI00230689	IPI00230692;IPI00284272;IPI00762553;IPI00230690;IPI00874946;IPI00874675;IPI00230689;IPI00460717;IPI00759934	Q91ZU6-4	>IPI:IPI00230692.1|SWISS-PROT:Q91ZU6-4 Tax_Id=10090 Gene_Symbol=Dst Isoform 4 of Bullous pemphigoid antigen 1;>IPI:IPI00284272.1|SWISS-PROT:Q91ZU6-3 Tax_Id=10090 Gene_Symbol=Dst Isoform 3 of Bullous pemphigoid antigen 1;>IPI:IPI00762553.2|ENSEMBL:ENSMUSP00
5.62968	3.75545	NaN	3.61298	NaN	NaN	NaN	NaN	NaN	NaN	NaN	NaN	3.80214	3.10193	6.2383	6.36092	2.68962	NaN	5.42094	4.47567	7.30941	5.94813	6.31832	9.00819	428	0.0999072	2	4;3	4	4	Acadsb	Short/branched chain specific acyl-CoA dehydrogenase, mitochondrial	IPI00119842;IPI00880948	IPI00119842;IPI00880948	Q9DBL1	>IPI:IPI00119842.1|SWISS-PROT:Q9DBL1|TREMBL:Q3V2R9;Q7TMY2|ENSEMBL:ENSMUSP00000015829|REFSEQ:NP_080102|VEGA:OTTMUSP00000032312 Tax_Id=10090 Gene_Symbol=Acadsb Short/branched chain specific acyl-CoA dehydrogenase, mitochondrial;>IPI:IPI00880948.1|ENSEMBL:ENS
17.7051	4.43144	7.95798	5.51086	NaN	NaN	NaN	NaN	NaN	NaN	NaN	NaN	2.87117	4.82929	4.67552	5.96552	6.03209	NaN	NaN	7.03878	6.13761	NaN	8.35491	9.23787	429	0.264326	3	3;3;3	3	3	Ly6h	Putative uncharacterized protein	IPI00134373;IPI00753569;IPI00848690	IPI00134373;IPI00753569;IPI00848690	Q9D1X6	>IPI:IPI00134373.1|TREMBL:Q9D1X6|ENSEMBL:ENSMUSP00000070646 Tax_Id=10090 Gene_Symbol=Ly6h Putative uncharacterized protein;>IPI:IPI00753569.1|TREMBL:Q8K356|ENSEMBL:ENSMUSP00000122061;ENSMUSP00000122878|REFSEQ:NP_035967|VEGA:OTTMUSP00000045767;OTTMUSP000000
5.36971	6.23053	6.21581	5.18995	NaN	NaN	NaN	NaN	3.39743	4.62193	3.93236	9.35278	3.35503	NaN	7.2098	6.80735	6.31912	4.22672	NaN	NaN	7.06714	8.45023	5.42035	3.25267	430	0.969723	4	4;4;1;1	4	3	Epn1	Isoform 2 of Epsin-1	IPI00330477;IPI00407944	IPI00330477;IPI00407944;IPI00857835;IPI00858233	Q80VP1-2	>IPI:IPI00330477.4|SWISS-PROT:Q80VP1-2|ENSEMBL:ENSMUSP00000104210 Tax_Id=10090 Gene_Symbol=Epn1 Isoform 2 of Epsin-1;>IPI:IPI00407944.2|SWISS-PROT:Q80VP1-1|ENSEMBL:ENSMUSP00000043340;ENSMUSP00000096445|REFSEQ:NP_034277|VEGA:OTTMUSP00000032065;OTTMUSP000000
2.30102	0.997108	2.36211	1.18742	NaN	NaN	1.1123	3.79679	NaN	NaN	NaN	NaN	1.18195	1.46434	1.57003	2.1312	2.5257	NaN	2.36686	1.59363	2.69723	2.64473	NaN	NaN	431	0.525834	1	7	7	7	Lypla2	Acyl-protein thioesterase 2	IPI00123518	IPI00123518	Q9WTL7	>IPI:IPI00123518.1|SWISS-PROT:Q9WTL7|TREMBL:B1AV56|ENSEMBL:ENSMUSP00000064204;ENSMUSP00000101478|REFSEQ:NP_036072|VEGA:OTTMUSP00000010412;OTTMUSP00000010413 Tax_Id=10090 Gene_Symbol=Lypla2 Acyl-protein thioesterase 2
7.2098	3.40959	12.3761	9.24129	6.19233	6.38203	4.26403	3.84305	NaN	NaN	NaN	NaN	4.55519	9.38174	10.283	5.62461	3.68528	7.41895	7.13878	10.6737	8.50485	NaN	5.42182	8.09914	432	0.691905	1	5	7	5	Gpd1	Glycerol-3-phosphate dehydrogenase [NAD+], cytoplasmic	IPI00230185	IPI00230185	P13707	>IPI:IPI00230185.5|SWISS-PROT:P13707|ENSEMBL:ENSMUSP00000023760|REFSEQ:NP_034401 Tax_Id=10090 Gene_Symbol=Gpd1 Glycerol-3-phosphate dehydrogenase [NAD+], cytoplasmic
0.189883	0.396024	NaN	0.335717	NaN	0.696913	0.22025	NaN	NaN	NaN	NaN	NaN	NaN	1.13812	NaN	0.367863	0.833403	NaN	0.271687	0.663174	0.132535	0.133385	NaN	1.61993	433	0.821068	3	9;9;2	9	9	Pcm1	Isoform 2 of Pericentriolar material 1 protein	IPI00828325;IPI00127764	IPI00828325;IPI00127764;IPI00850136	Q9R0L6-2	>IPI:IPI00828325.1|SWISS-PROT:Q9R0L6-2|ENSEMBL:ENSMUSP00000039056 Tax_Id=10090 Gene_Symbol=Pcm1 Isoform 2 of Pericentriolar material 1 protein;>IPI:IPI00127764.2|SWISS-PROT:Q9R0L6-1|TREMBL:B2RSW8|ENSEMBL:ENSMUSP00000039709|REFSEQ:NP_076151 Tax_Id=10090 Gen
1.52602	2.90276	NaN	6.23792	5.04159	14.1513	5.91891	8.34446	NaN	2.22336	2.09008	7.16435	2.33416	1.5635	4.37982	2.73755	5.16716	0.753466	NaN	3.55303	2.64697	3.83789	10.298	9.41	434	0.160199	3	5;5;1	5	5	Gnb5	Isoform 1 of Guanine nucleotide-binding protein subunit beta-5	IPI00127930;IPI00378017	IPI00127930;IPI00378017;IPI00653024	P62881-1	>IPI:IPI00127930.1|SWISS-PROT:P62881-1|TREMBL:Q3V331|ENSEMBL:ENSMUSP00000076155|REFSEQ:NP_034443 Tax_Id=10090 Gene_Symbol=Gnb5 Isoform 1 of Guanine nucleotide-binding protein subunit beta-5;>IPI:IPI00378017.1|SWISS-PROT:P62881-2|TREMBL:Q3UG14;Q9CU21|REFSEQ
84.8752	22.5083	15.8763	48.8543	82.1895	24.1447	57.1265	35.6367	111.876	51.8027	35.0214	36.4857	20.2482	32.1172	9.20556	23.334	139.821	58.1429	37.5305	51.6903	92.43	40.7216	40.0208	98.0008	435	0.0768102	2	2;2	19	2	Hbbt1;Hbb-b1; Hbb-b2; Hbbt2		IPI00762198;IPI00553333	IPI00762198;IPI00553333	A8DUK2;A8DUK4;A8DUL0;A8DUL2;A8DUL5;A8DUL7	>IPI:IPI00762198.2|TREMBL:A8DUK2;A8DUK4;A8DUL0;A8DUL2;A8DUL5;A8DUL7;A8DUM2;A8DUN2;A8DUP0;A8DUP3;A8DUP5;A8DUP7;A8DUQ1;A8DUQ5;B1Q450|ENSEMBL:ENSMUSP00000023934;ENSMUSP00000095794|REFSEQ:NP_032246|VEGA:OTTMUSP00000020530;OTTMUSP00000020541 Tax_Id=10090 Gene_S
5.75904	2.01674	1.31567	3.97551	7.01262	7.50356	7.65463	5.35074	3.58744	NaN	3.17259	3.39893	4.12371	7.74113	6.04924	4.96032	3.34997	8.03084	9.08101	1.01038	8.17662	4.85131	4.798	7.14184	436	0.192847	2	12;8	12	12	Slc12a2	solute carrier family 12 member 2	IPI00135324;IPI00755909	IPI00135324;IPI00755909	P55012	>IPI:IPI00135324.2|SWISS-PROT:P55012|TREMBL:Q3TP36|ENSEMBL:ENSMUSP00000111023|REFSEQ:NP_033220 Tax_Id=10090 Gene_Symbol=Slc12a2 solute carrier family 12 member 2;>IPI:IPI00755909.1|REFSEQ:XP_001477754 Tax_Id=10090 Gene_Symbol=LOC100047237 similar to solute
3.27718	3.70837	3.2635	2.28472	4.68516	3.61089	1.74767	2.12562	1.53879	3.6547	1.65265	2.44595	1.38533	1.36685	1.78635	1.04617	4.05039	3.34124	1.98358	4.38059	4.98952	1.37221	1.60792	1.39386	437	0.054923	1	13	14	12	Gstm5;Fsc2; Gstm3	Glutathione S-transferase Mu 5	IPI00114380	IPI00114380	P48774	>IPI:IPI00114380.1|SWISS-PROT:P48774|ENSEMBL:ENSMUSP00000004134|REFSEQ:NP_034490 Tax_Id=10090 Gene_Symbol=Gstm5 Glutathione S-transferase Mu 5
6.98617	5.68925	6.42013	10.4019	25.5167	14.3961	5.92979	6.30955	6.6827	5.49602	9.81065	13.5962	8.38434	7.37735	7.92645	6.8292	6.10202	10.6676	16.8791	13.2196	9.32748	21.0358	22.3304	15.2448	438	0.123866	1	3	3	3	Cldn11	Claudin-11	IPI00120295	IPI00120295	Q60771	>IPI:IPI00120295.1|SWISS-PROT:Q60771|ENSEMBL:ENSMUSP00000042181|REFSEQ:NP_032796|VEGA:OTTMUSP00000025883 Tax_Id=10090 Gene_Symbol=Cldn11 Claudin-11
0.157151	0.244523	0.312422	0.386563	0.207387	0.258031	0.216347	0.317945	0.216873	0.254492	0.218727	0.230054	0.224235	0.212211	0.228571	0.275232	0.285339	0.266717	0.303453	0.262446	0.238584	0.229774	0.281547	0.205613	439	0.708819	4	9;9;4;2	9	9	Rpl10a	60S ribosomal protein L10a	IPI00127085;IPI00849927	IPI00127085;IPI00849927;IPI00122598;IPI00856537	P53026	>IPI:IPI00127085.6|SWISS-PROT:P53026 Tax_Id=10090 Gene_Symbol=Rpl10a 60S ribosomal protein L10a;>IPI:IPI00849927.1|TREMBL:Q3U561;Q5XJF6;Q99JL6|ENSEMBL:ENSMUSP00000048469|REFSEQ:NP_035417;XP_001476443;XP_001479766|VEGA:OTTMUSP00000027303;OTTMUSP00000042377
0.135452	0.327622	0.29584	0.357283	0.242289	0.267716	0.226572	0.436186	0.250037	0.355783	0.250081	0.207374	0.23138	0.283873	0.184781	0.312393	0.32143	0.307797	0.244326	0.338903	0.391405	0.23596	0.239275	0.289042	440	0.931319	6	9;8;7;7;5;3	9	9	Rpl26	60S ribosomal protein L26	IPI00132460;IPI00649136;IPI00874521;IPI00880492;IPI00118166	IPI00132460;IPI00649136;IPI00874521;IPI00880492;IPI00118166;IPI00474008	P61255	>IPI:IPI00132460.1|SWISS-PROT:P61255|TREMBL:Q3U7N1;Q4FZH2|ENSEMBL:ENSMUSP00000073175|REFSEQ:NP_033106|VEGA:OTTMUSP00000006143 Tax_Id=10090 Gene_Symbol=Rpl26 60S ribosomal protein L26;>IPI:IPI00649136.1|TREMBL:B1ARA5|ENSEMBL:ENSMUSP00000098576|VEGA:OTTMUSP0
0.219727	0.358513	0.345268	0.405433	0.300969	0.326744	0.3121	0.399744	0.350018	0.401333	0.290385	0.286221	0.46292	0.228754	0.212422	0.350779	0.34002	0.331752	0.268183	0.300246	0.313401	0.216067	0.265104	0.293384	441	0.750637	3	8;8;6	8	8	Rps16	Rps16 protein	IPI00469918;IPI00969002;IPI00850220	IPI00469918;IPI00969002;IPI00850220	P14131	>IPI:IPI00469918.4|SWISS-PROT:P14131|TREMBL:A4FUS1;Q5CZY9;Q641N3|ENSEMBL:ENSMUSP00000047384;ENSMUSP00000103940|REFSEQ:NP_038675;XP_001479949|VEGA:OTTMUSP00000026473 Tax_Id=10090 Gene_Symbol=Rps16 Rps16 protein;>IPI:IPI00969002.1|ENSEMBL:ENSMUSP00000076000
0.671051	0.888573	0.971157	1.30647	0.778271	0.795102	0.733783	1.16771	0.798977	0.91617	0.870095	0.717051	1.26376	0.885269	0.839419	0.94304	0.989511	0.900171	0.803084	0.897908	0.817795	0.773395	0.99226	0.716897	442	0.701224	2	8;7	8	8	Psmd8	26S proteasome non-ATPase regulatory subunit 8	IPI00856490;IPI00403509	IPI00856490;IPI00403509	Q3TG45;Q3TI95;Q3TVY0;Q3TW90;Q3U617;Q8BKP5;Q99JB5;Q9CPS5	>IPI:IPI00856490.1|TREMBL:Q3TG45;Q3TI95;Q3TVY0;Q3TW90;Q3U617;Q8BKP5;Q99JB5;Q9CPS5|ENSEMBL:ENSMUSP00000051657|REFSEQ:NP_080821 Tax_Id=10090 Gene_Symbol=Psmd8 26S proteasome non-ATPase regulatory subunit 8;>IPI:IPI00403509.5|SWISS-PROT:Q9CX56 Tax_Id=10090 Ge
0.171518	0.247115	0.353719	0.37853	0.191274	0.254123	0.258632	0.386488	1.43266	0.323321	0.290091	0.222782	0.377003	0.207965	0.216967	0.266404	0.318816	0.255643	0.134095	0.300472	0.176395	0.134698	0.16199	0.180535	443	0.152652	6	7;7;7;5;4;4	7	7	Rpl19	60S ribosomal protein L19	IPI00122426;IPI00264398;IPI00648315;IPI00754211;IPI00849754;IPI00853788	IPI00122426;IPI00264398;IPI00648315;IPI00754211;IPI00849754;IPI00853788	P84099	>IPI:IPI00122426.1|SWISS-PROT:P84099|TREMBL:Q5I0T8|ENSEMBL:ENSMUSP00000017548|REFSEQ:NP_033104;XP_001475785|VEGA:OTTMUSP00000002812 Tax_Id=10090 Gene_Symbol=Rpl19 60S ribosomal protein L19;>IPI:IPI00264398.3|REFSEQ:XP_001476626 Tax_Id=10090 Gene_Symbol=Gm1
1.20881	2.18126	1.91161	1.81015	1.55306	1.55746	1.28271	1.88292	1.55887	1.90465	1.68447	1.13182	2.87282	1.47745	1.62803	1.83543	2.2096	1.89011	1.60563	1.4511	1.61996	1.10058	1.67867	1.74161	444	0.668854	3	8;8;7	8	7	Tjp1	195 kDa protein	IPI00874522;IPI00944062;IPI00135971	IPI00874522;IPI00944062;IPI00135971	B9EHJ3	>IPI:IPI00874522.1|ENSEMBL:ENSMUSP00000032729 Tax_Id=10090 Gene_Symbol=Tjp1 195 kDa protein;>IPI:IPI00944062.1|TREMBL:B9EHJ3;Q91YW2|REFSEQ:NP_001157046 Tax_Id=10090 Gene_Symbol=Tjp1 tight junction protein ZO-1 isoform 2;>IPI:IPI00135971.1|SWISS-PROT:P39447
0.808931	1.51609	1.38217	1.69572	1.40815	1.46257	1.09323	1.25122	1.09054	0.971534	1.09199	1.03029	0.981932	1.1622	1.2011	1.56986	1.3064	1.41317	1.45868	1.34651	1.44248	0.945984	0.734484	1.23985	445	0.323998	2	6;6	6	6	H1f0	Histone H1.0	IPI00467914;IPI00404590	IPI00467914;IPI00404590	P10922	>IPI:IPI00467914.3|SWISS-PROT:P10922|TREMBL:Q3U4Y0|REFSEQ:NP_032223 Tax_Id=10090 Gene_Symbol=H1f0 Histone H1.0;>IPI:IPI00404590.1|TREMBL:Q8C1Y3 Tax_Id=10090 Gene_Symbol=H1f0 Putative uncharacterized protein
0.299446	0.258238	0.333901	0.526011	0.397519	0.42996	0.419498	0.413907	0.324013	0.38257	0.278753	0.269317	0.356862	0.316026	0.299841	0.535103	0.259323	0.362503	0.192994	0.303702	0.245501	0.169411	0.379032	0.300978	446	0.131168	5	6;6;6;6;6	6	5	Srsf5; Hrs; Sfrs5	Splicing factor, arginine/serine-rich 5	IPI00314709;IPI00673669;IPI00830743;IPI00670246;IPI00874715	IPI00314709;IPI00673669;IPI00830743;IPI00670246;IPI00874715	O35326	>IPI:IPI00314709.1|SWISS-PROT:O35326 Tax_Id=10090 Gene_Symbol=Sfrs5 Splicing factor, arginine/serine-rich 5;>IPI:IPI00673669.2|TREMBL:Q9D8S5|ENSEMBL:ENSMUSP00000105980;ENSMUSP00000105983|VEGA:OTTMUSP00000023358;OTTMUSP00000023360 Tax_Id=10090 Gene_Symbol=S
0.347633	0.572705	0.63593	0.745657	0.502993	0.519696	0.525901	0.616181	0.462985	0.623636	0.550418	0.437388	1.06226	0.583601	0.443636	0.60983	0.637552	0.588928	0.291197	0.641643	0.482882	0.427332	0.512899	0.544751	447	0.782881	2	5;5	7	5	Hnrpdl	heterogeneous nuclear ribonucleoprotein D-like	IPI00755892;IPI00129417	IPI00755892;IPI00129417	D3YTQ3	>IPI:IPI00755892.1|TREMBL:D3YTQ3|ENSEMBL:ENSMUSP00000084114;ENSMUSP00000121005|REFSEQ:NP_057899|VEGA:OTTMUSP00000029556;OTTMUSP00000029558 Tax_Id=10090 Gene_Symbol=Hnrpdl heterogeneous nuclear ribonucleoprotein D-like;>IPI:IPI00129417.1|SWISS-PROT:Q9Z130|E
0.19363	0.4998	0.379536	0.44839	0.3333	0.393887	0.357615	0.454628	0.254913	0.309081	0.331928	0.182785	0.375291	0.309847	0.243499	0.395569	0.352696	0.432994	0.360646	0.33173	0.339928	0.210553	0.282103	0.398835	448	0.351609	3	5;4;1	5	5	Erh;Gm10131		IPI00403589;IPI00620075	IPI00403589;IPI00620075;IPI00453876	P84089	>IPI:IPI00403589.1|SWISS-PROT:P84089|TREMBL:Q4FZH7|ENSEMBL:ENSMUSP00000021559|REFSEQ:NP_031977;XP_001478989 Tax_Id=10090 Gene_Symbol=Erh;Gm10131 Enhancer of rudimentary homolog;>IPI:IPI00620075.2|REFSEQ:XP_001479657;XP_898953 Tax_Id=10090 Gene_Symbol=Gm694
0.195351	0.284155	0.276916	0.334001	0.262357	0.289343	0.225251	0.332138	0.292637	0.249919	0.239229	0.231305	0.38847	0.257288	0.271872	0.271813	0.301796	0.324044	0.183066	0.257911	0.241978	0.172482	0.217424	0.259788	449	0.440524	2	10;10	10	4	Rbbp4	Histone-binding protein RBBP4	IPI00122696;IPI00828412	IPI00122696;IPI00828412	Q60972	>IPI:IPI00122696.5|SWISS-PROT:Q60972 Tax_Id=10090 Gene_Symbol=Rbbp4 Histone-binding protein RBBP4;>IPI:IPI00828412.1|TREMBL:A2A875|ENSEMBL:ENSMUSP00000099658|REFSEQ:NP_033056|VEGA:OTTMUSP00000010088;OTTMUSP00000042899 Tax_Id=10090 Gene_Symbol=Rbbp4 histone
1.69837	2.46737	2.93591	2.99572	2.88734	2.77408	2.92654	3.08252	2.7027	3.50349	2.7859	2.25357	3.26968	3.72523	2.55598	3.3237	3.03794	4.05795	2.13192	2.49277	3.32956	2.21774	2.35267	2.11064	450	0.454946	4	3;3;2;1	3	3	Atp5l	Putative uncharacterized protein	IPI00133342;IPI00876323;IPI00662189	IPI00133342;IPI00876323;IPI00662189;IPI00762803	Q9CQY3;Q9D037	>IPI:IPI00133342.1|TREMBL:Q9CQY3;Q9D037|ENSEMBL:ENSMUSP00000110336|REFSEQ:XP_001478576;XP_001478587 Tax_Id=10090 Gene_Symbol=Atp5l Putative uncharacterized protein;>IPI:IPI00876323.1|SWISS-PROT:Q9CPQ8|ENSEMBL:ENSMUSP00000047960|REFSEQ:NP_038823;XP_00147850
0.534559	0.731743	0.924727	0.88574	0.772499	0.727961	0.658415	1.09088	0.57019	0.68937	0.675219	0.534388	1.08449	0.803923	0.676224	0.706215	0.818532	0.849618	0.824198	0.940999	0.609236	0.629842	0.773575	0.811162	451	0.176825	3	3;3;2	5	3	Hdgf	Hepatoma-derived growth factor	IPI00313817;IPI00882349	IPI00313817;IPI00882349;IPI00880309	P51859	>IPI:IPI00313817.1|SWISS-PROT:P51859|ENSEMBL:ENSMUSP00000005017|REFSEQ:NP_032257|VEGA:OTTMUSP00000033822 Tax_Id=10090 Gene_Symbol=Hdgf Hepatoma-derived growth factor;>IPI:IPI00882349.1|VEGA:OTTMUSP00000033823 Tax_Id=10090 Gene_Symbol=Hdgf 22 kDa protein
14.3802	5.6844	7.75916	6.81617	12.8431	10.2207	12.8378	9.95719	9.84543	7.58725	9.00009	10.2685	4.34858	7.36919	10.6341	11.987	7.57748	10.0432	12.8664	8.35143	13.8326	15.9347	12.4659	13.4454	452	0.0880144	2	42;38	42	3	Syn1	Isoform Ia of Synapsin-1	IPI00649886;IPI00649467	IPI00649886;IPI00649467	O88935-2	>IPI:IPI00649886.1|SWISS-PROT:O88935-2|ENSEMBL:ENSMUSP00000080568|REFSEQ:NP_038708 Tax_Id=10090 Gene_Symbol=Syn1 Isoform Ia of Synapsin-1;>IPI:IPI00649467.3|SWISS-PROT:O88935-3|ENSEMBL:ENSMUSP00000037545 Tax_Id=10090 Gene_Symbol=Syn1 Isoform 3 of Synapsin-
0.718391	1.23042	1.24916	NaN	1.0821	1.04146	1.0289	1.45637	0.9999	1.17571	0.902527	0.929282	1.74092	NaN	1.05197	1.2596	1.14782	1.19993	0.657246	1.1406	1.28662	0.861475	1.07246	1.14833	453	0.596913	3	3;2;2	3	3	Ufd1l	ubiquitin fusion degradation protein 1 homolog	IPI00331192;IPI00656165;IPI00656182	IPI00331192;IPI00656165;IPI00656182	Q8C2D2;Q923C4;Q9CWQ7	>IPI:IPI00331192.4|TREMBL:Q8C2D2;Q923C4;Q9CWQ7|ENSEMBL:ENSMUSP00000005394|REFSEQ:NP_035802 Tax_Id=10090 Gene_Symbol=Ufd1l ubiquitin fusion degradation protein 1 homolog;>IPI:IPI00656165.1|SWISS-PROT:P70362 Tax_Id=10090 Gene_Symbol=Ufd1l Ubiquitin fusion de
0.0696185	0.0569152	0.0627589	0.0638122	0.0544425	0.0528262	0.0502563	0.0721292	0.060042	0.0735944	0.0602882	0.0617055	0.0612332	0.0349211	0.0591051	0.0530842	0.0683948	0.0612108	0.0579005	0.0659239	0.0673355	0.0646705	0.0531689	0.0535475	454	0.2681	4	25;8;4;2	25	25	Asns	Asparagine synthetase [glutamine-hydrolyzing]	IPI00116966	IPI00116966;IPI00857879;IPI00857568;IPI00858226	Q61024	>IPI:IPI00116966.8|SWISS-PROT:Q61024|TREMBL:Q3TIA9;Q3TV20|ENSEMBL:ENSMUSP00000031766;ENSMUSP00000111204|REFSEQ:NP_036185|VEGA:OTTMUSP00000026130;OTTMUSP00000026131 Tax_Id=10090 Gene_Symbol=Asns Asparagine synthetase [glutamine-hydrolyzing]
3.21265	4.2461	3.71154	3.32425	4.20345	3.7456	7.18804	2.44296	4.14559	4.39097	4.3501	7.19683	1.76336	4.28669	8.33681	3.2416	3.77601	5.0875	4.54029	4.64706	6.87285	6.08346	4.98306	6.36699	455	0.355912	2	20;18	20	20	Hap1	Isoform A of Huntingtin-associated protein 1	IPI00230495;IPI00132819	IPI00230495;IPI00132819	O35668-2	>IPI:IPI00230495.1|SWISS-PROT:O35668-2|TREMBL:A2A4H6|ENSEMBL:ENSMUSP00000099413|REFSEQ:NP_034534|VEGA:OTTMUSP00000006600 Tax_Id=10090 Gene_Symbol=Hap1 Isoform A of Huntingtin-associated protein 1;>IPI:IPI00132819.1|SWISS-PROT:O35668-1|ENSEMBL:ENSMUSP000000
0.375784	0.490485	0.56699	0.539171	0.545941	0.589032	0.532907	0.705716	0.577467	0.618927	0.482695	0.464792	0.665026	0.473507	0.508259	0.572803	0.634679	0.700427	0.661026	0.530335	0.52829	0.491473	0.528374	0.532141	456	0.150368	5	20;11;9;7;3	20	20	Fkbp4	Peptidyl-prolyl cis-trans isomerase FKBP4	IPI00230139;IPI00856205	IPI00230139;IPI00856205;IPI00858243;IPI00856902;IPI00849456	P30416	>IPI:IPI00230139.5|SWISS-PROT:P30416|TREMBL:Q8CBS1|ENSEMBL:ENSMUSP00000032508|REFSEQ:NP_034349|VEGA:OTTMUSP00000029542 Tax_Id=10090 Gene_Symbol=Fkbp4 Peptidyl-prolyl cis-trans isomerase FKBP4;>IPI:IPI00856205.1|ENSEMBL:ENSMUSP00000119930|VEGA:OTTMUSP000000
2.0059	2.94247	3.11168	NaN	3.56722	2.81476	2.61192	NaN	NaN	NaN	NaN	1.94401	NaN	4.35787	NaN	NaN	NaN	3.04275	2.13379	NaN	3.2307	NaN	4.00112	2.03849	457	0.859196	4	2;2;2;2	2	2	Fbxo3	Isoform 1 of F-box only protein 3	IPI00120202;IPI00410808;IPI00753481;IPI00752887	IPI00120202;IPI00410808;IPI00753481;IPI00752887	Q9DC63-1	>IPI:IPI00120202.1|SWISS-PROT:Q9DC63-1|TREMBL:Q8CDU1|ENSEMBL:ENSMUSP00000028603|REFSEQ:NP_997598|VEGA:OTTMUSP00000015845 Tax_Id=10090 Gene_Symbol=Fbxo3 Isoform 1 of F-box only protein 3;>IPI:IPI00410808.1|SWISS-PROT:Q9DC63-2|ENSEMBL:ENSMUSP00000099625|REFS
0.0886525	0.440393	0.468428	0.405416	0.259269	0.298811	0.24192	0.280473	0.210761	0.283238	0.230394	0.242589	0.388939	0.3444	0.354962	0.231294	0.520075	0.250583	0.125888	0.451875	0.190136	0.23456	0.349284	0.289402	458	0.947256	5	2;2;1;1;1	2	2	Pabpn1;Bcl2l2;Pab2;Pabp2		IPI00136169;IPI00410858;IPI00918348;IPI00918200;IPI00918132	IPI00136169;IPI00410858;IPI00918348;IPI00918200;IPI00918132	Q8CCS6-1	>IPI:IPI00136169.1|SWISS-PROT:Q8CCS6-1|ENSEMBL:ENSMUSP00000022808|REFSEQ:NP_062275|VEGA:OTTMUSP00000043753 Tax_Id=10090 Gene_Symbol=Pabpn1;Bcl2l2 Isoform 1 of Polyadenylate-binding protein 2;>IPI:IPI00410858.2|SWISS-PROT:Q8CCS6-2|ENSEMBL:ENSMUSP00000112177
5.81632	5.8827	5.73493	7.71605	4.77532	6.50957	4.89404	5.98408	7.10379	7.20928	7.25479	5.33248	5.63317	5.5639	7.78392	5.03677	4.93413	6.64187	6.69972	5.22302	5.84112	5.35074	6.3484	5.64111	459	0.542539	3	19;18;18	19	18	Pura;LOC100045958		IPI00118447;IPI00757181;IPI00751607	IPI00118447;IPI00757181;IPI00751607	P42669	>IPI:IPI00118447.1|SWISS-PROT:P42669|TREMBL:Q8C6E9|ENSEMBL:ENSMUSP00000059404|REFSEQ:NP_033015;XP_001475457|VEGA:OTTMUSP00000044566 Tax_Id=10090 Gene_Symbol=Pura;LOC100045958 Transcriptional activator protein Pur-alpha;>IPI:IPI00757181.1|REFSEQ:XP_00147548
0.26902	0.321337	0.453042	0.519723	0.303453	0.401849	0.297672	0.484144	0.310569	0.40321	0.313883	0.335649	0.566348	0.378215	0.314891	0.400609	0.391068	0.390092	0.244864	0.314268	0.334035	0.277485	0.346093	0.330098	460	0.638757	7	16;14;14;13;12;11;10	16	16	Eif2s3x	Eukaryotic translation initiation factor 2 subunit 3, X-linked	IPI00230415;IPI00851014;IPI00853793;IPI00230416;IPI00968369;IPI00775852;IPI00407546	IPI00230415;IPI00851014;IPI00853793;IPI00230416;IPI00968369;IPI00775852;IPI00407546	Q9Z0N1	>IPI:IPI00230415.5|SWISS-PROT:Q9Z0N1|TREMBL:Q3TML6;Q3U5H6;Q3UDF8;Q3UIJ2;Q6NY07;Q9CRE9|ENSEMBL:ENSMUSP00000059395|REFSEQ:NP_036140|VEGA:OTTMUSP00000019612 Tax_Id=10090 Gene_Symbol=Eif2s3x Eukaryotic translation initiation factor 2 subunit 3, X-linked;>IPI:I
3.9801	1.85446	2.84835	3.35796	4.03633	3.19683	3.83068	1.63908	3.76903	4.6066	3.93113	3.92758	4.01284	3.11303	3.37849	3.25606	3.48032	4.00737	5.74514	2.89586	3.60373	4.55208	4.70522	3.64564	461	0.274672	5	14;14;9;3;3	14	14	Rtn3	Isoform 1 of Reticulon-3	IPI00470981;IPI00480414;IPI00750847	IPI00470981;IPI00480414;IPI00750847;IPI00474993;IPI00112948	Q9ES97-1	>IPI:IPI00470981.2|SWISS-PROT:Q9ES97-1|ENSEMBL:ENSMUSP00000065810|REFSEQ:NP_001003934 Tax_Id=10090 Gene_Symbol=Rtn3 Isoform 1 of Reticulon-3;>IPI:IPI00480414.2|SWISS-PROT:Q9ES97-2|TREMBL:Q8C6L4|ENSEMBL:ENSMUSP00000085496|REFSEQ:NP_001003933 Tax_Id=10090 Ge
0.108816	0.115021	0.108803	0.157891	0.087943	0.110724	0.0959969	0.108106	0.0982125	0.113323	0.0932401	0.0994926	0.149831	0.0759994	0.0738552	0.11095	0.0904568	0.102186	0.111123	0.103572	0.121919	0.0870247	0.112365	0.0980296	462	0.61297	2	13;13	13	12	Nap1l1	nucleosome assembly protein 1-like 1 isoform 1	IPI00929813;IPI00123199	IPI00929813;IPI00123199	Q9CSP8;Q3UL14;Q8BSH9;P28656;Q3TF41	>IPI:IPI00929813.1|REFSEQ:NP_001140179 Tax_Id=10090 Gene_Symbol=Nap1l1 nucleosome assembly protein 1-like 1 isoform 1;>IPI:IPI00123199.1|SWISS-PROT:P28656|TREMBL:Q3TF41;Q8BSH9;Q9CSP8|ENSEMBL:ENSMUSP00000070068|REFSEQ:NP_056596 Tax_Id=10090 Gene_Symbol=Nap1
1.56343	2.32315	2.32726	2.465	2.08359	2.16179	2.25515	2.46378	2.36776	2.52455	2.40263	2.48435	2.35805	2.3672	2.07254	2.45056	1.88993	2.27744	1.49869	2.35161	2.06577	1.8473	2.02261	2.2059	463	0.242244	2	11;2	18	11	Ywhah	41701 protein eta	IPI00227392	IPI00227392;IPI00403324	P68510	>IPI:IPI00227392.5|SWISS-PROT:P68510|ENSEMBL:ENSMUSP00000019109|REFSEQ:NP_035868|VEGA:OTTMUSP00000017560 Tax_Id=10090 Gene_Symbol=Ywhah 14-3-3 protein eta
0.151405	0.316807	0.324939	0.432844	0.252137	0.288135	0.219607	0.372842	0.277377	0.264347	0.238152	0.226454	0.327364	0.310887	0.274446	0.311643	0.300454	0.339963	0.187917	0.303131	0.283905	0.179427	0.235877	0.248213	464	0.702339	4	10;8;8;8	10	10	Rpl13;Gm12918;Gm15710		IPI00224505;IPI00653474;IPI00134097;IPI00890196	IPI00224505;IPI00653474;IPI00134097;IPI00890196	P47963	>IPI:IPI00224505.7|SWISS-PROT:P47963|ENSEMBL:ENSMUSP00000000756|REFSEQ:NP_058018;XP_001473225;XP_001473412;XP_001475146|VEGA:OTTMUSP00000017746 Tax_Id=10090 Gene_Symbol=Rpl13;Gm12918;Gm15710 60S ribosomal protein L13;>IPI:IPI00653474.1|TREMBL:Q5RKP3 Tax_Id
7.65404	7.22491	8.05413	8.97585	9.21999	8.09914	8.20008	9.23958	8.79121	8.63931	8.09258	8.1606	4.3573	6.28931	8.51209	8.73515	9.73615	8.84095	8.50847	7.82044	8.24131	7.67342	9.71723	8.52515	465	0.188626	4	10;8;8;6	10	10	Dbi	Acyl-CoA-binding protein	IPI00667117;IPI00222430;IPI00831604;IPI00831693	IPI00667117;IPI00222430;IPI00831604;IPI00831693	P31786	>IPI:IPI00667117.2|SWISS-PROT:P31786|TREMBL:Q3ULV8;Q548W7|ENSEMBL:ENSMUSP00000027634|REFSEQ:NP_031856|VEGA:OTTMUSP00000024099 Tax_Id=10090 Gene_Symbol=Dbi Acyl-CoA-binding protein;>IPI:IPI00222430.5|TREMBL:Q4VWZ5|ENSEMBL:ENSMUSP00000092199;ENSMUSP000001147
12.7807	5.14112	3.61063	4.92465	4.895	8.06062	8.35841	4.59369	6.31433	5.11614	11.6917	9.00577	2.72057	3.88591	9.46521	6.66489	3.55594	5.1557	4.89596	5.46837	4.87733	5.77434	2.99312	1.50505	466	0.23159	3	10;10;7	10	10	Slc8a1	Sodium/calcium exchanger 1	IPI00109213;IPI00623542;IPI00268433	IPI00109213;IPI00623542;IPI00268433	P70414	>IPI:IPI00109213.1|SWISS-PROT:P70414|ENSEMBL:ENSMUSP00000083725|REFSEQ:NP_035536 Tax_Id=10090 Gene_Symbol=Slc8a1 Sodium/calcium exchanger 1;>IPI:IPI00623542.3|TREMBL:O35157;Q68FL0;Q8BXB3;Q91ZQ6;Q9ET70;Q9ET71|ENSEMBL:ENSMUSP00000067975|REFSEQ:NP_001106269 T
2.04897	3.78931	3.50177	4.46309	2.56239	3.24244	3.87868	5.81024	2.35222	2.90833	2.82255	2.11829	5.13928	4.90196	3.2774	3.34057	5.60978	3.60062	1.64187	3.53707	3.03324	2.80308	3.77644	3.06739	467	0.413955	6	7;7;7;7;7;3	7	1	Mapk10	Isoform Alpha-2 of Mitogen-activated protein kinase 10	IPI00623629;IPI00406158;IPI00775773;IPI00776102;IPI00762375	IPI00623629;IPI00406158;IPI00775773;IPI00776102;IPI00762375;IPI00653963	Q61831-1	>IPI:IPI00623629.2|SWISS-PROT:Q61831-1|ENSEMBL:ENSMUSP00000108469|VEGA:OTTMUSP00000017557 Tax_Id=10090 Gene_Symbol=Mapk10 Isoform Alpha-2 of Mitogen-activated protein kinase 10;>IPI:IPI00406158.5|TREMBL:Q80W80;Q80W81|ENSEMBL:ENSMUSP00000056304;ENSMUSP00000
0.779241	1.01729	1.07033	1.11077	0.893495	0.945805	0.954745	1.15079	0.950751	1.07994	0.962649	0.955932	1.12031	0.913576	0.953471	1.03125	1.09597	1.17799	0.731743	1.10455	1	0.905387	0.988826	0.974754	468	0.997221	1	39	39	39	Stip1	Stress-induced-phosphoprotein 1	IPI00121514	IPI00121514	Q60864	>IPI:IPI00121514.3|SWISS-PROT:Q60864|TREMBL:Q3THQ5|ENSEMBL:ENSMUSP00000025918|REFSEQ:NP_058017 Tax_Id=10090 Gene_Symbol=Stip1 Stress-induced-phosphoprotein 1
5.53925	4.66548	4.67399	5.14695	6.23014	7.52106	6.69613	6.33874	4.5043	5.79542	7.49457	7.64409	3.57884	6.88042	7.28014	8.16993	6.54407	6.11023	7.10328	5.58316	4.7081	5.90702	6.77461	5.92698	469	0.448595	1	12	12	11	Pgrmc1	Membrane-associated progesterone receptor component 1	IPI00319973	IPI00319973	O55022	>IPI:IPI00319973.3|SWISS-PROT:O55022|TREMBL:Q3TFP8;Q3TH84;Q3TXU8|ENSEMBL:ENSMUSP00000073061|REFSEQ:NP_058063|VEGA:OTTMUSP00000018583 Tax_Id=10090 Gene_Symbol=Pgrmc1 Membrane-associated progesterone receptor component 1
2.08412	2.79197	3.01969	3.15418	2.8641	2.77216	2.80923	2.63206	3.0554	3.32237	2.92415	2.78064	3.06363	2.75718	2.99106	2.53197	2.88659	2.85152	2.23884	2.97584	2.59168	2.54304	3.16776	2.92338	470	0.813907	1	11	11	11	Sfxn1	Sideroflexin-1	IPI00115454	IPI00115454	Q99JR1	>IPI:IPI00115454.3|SWISS-PROT:Q99JR1|TREMBL:Q8BPC9|ENSEMBL:ENSMUSP00000021930|REFSEQ:NP_081600 Tax_Id=10090 Gene_Symbol=Sfxn1 Sideroflexin-1
0.706664	0.902364	1.0893	1.15563	0.849762	0.93188	0.758035	0.964972	0.752163	0.928591	0.753125	0.70368	1.09124	0.809651	0.90269	0.906454	0.921404	0.937383	0.672766	0.981162	0.794344	0.690703	0.781189	0.730193	471	0.195782	1	9	9	9	2700060E02Rik	UPF0568 protein C14orf166 homolog	IPI00132456	IPI00132456	Q9CQE8	>IPI:IPI00132456.1|SWISS-PROT:Q9CQE8|TREMBL:Q4VA29|ENSEMBL:ENSMUSP00000022341|REFSEQ:NP_080804 Tax_Id=10090 Gene_Symbol=2700060E02Rik UPF0568 protein C14orf166 homolog
0.607755	0.921914	0.918105	0.993049	0.848104	0.88129	0.83949	1.10983	0.752955	0.907441	0.819538	0.75706	1.04291	1.14012	0.83949	0.920641	1.02093	0.932227	0.597015	0.863558	0.770653	0.621465	0.793966	0.761963	472	0.242953	1	7	7	7	Psmb1	Proteasome subunit beta type-1	IPI00113845	IPI00113845	O09061	>IPI:IPI00113845.1|SWISS-PROT:O09061|TREMBL:Q6LCE5;Q6RI64|ENSEMBL:ENSMUSP00000014913|REFSEQ:NP_035315 Tax_Id=10090 Gene_Symbol=Psmb1 Proteasome subunit beta type-1
1.06875	1.16659	1.03732	1.05169	1.07041	0.971912	1.0536	1.09007	1.03649	1.08738	1.02022	0.979912	0.859476	1.09261	1.1658	1.35897	1.02417	1.07734	1.25551	1.11053	0.922084	0.989218	1.12421	1.22935	473	0.884216	1	7	38	7	Tubb5	Tubulin beta-5 chain	IPI00117352	IPI00117352	P99024	>IPI:IPI00117352.1|SWISS-PROT:P99024|TREMBL:Q80ZV2|ENSEMBL:ENSMUSP00000001566|REFSEQ:NP_035785|VEGA:OTTMUSP00000032384 Tax_Id=10090 Gene_Symbol=Tubb5 Tubulin beta-5 chain
0.326829	0.706564	0.70917	0.595451	0.358912	0.548908	0.354572	0.481997	0.583192	0.687427	0.614326	0.445732	0.765814	0.467814	0.45498	0.529101	0.44285	0.551633	0.35671	0.500751	0.517706	0.35068	0.378243	0.599484	474	0.420478	1	8	8	6	Ctps;Ctps1	CTP synthase 1	IPI00111959	IPI00111959	P70698	>IPI:IPI00111959.2|SWISS-PROT:P70698|TREMBL:B1AS53;Q3TPP2|ENSEMBL:ENSMUSP00000030381|REFSEQ:NP_058028|VEGA:OTTMUSP00000009199 Tax_Id=10090 Gene_Symbol=Ctps CTP synthase 1
0.34167	0.714133	0.860585	0.952472	0.621852	0.453104	0.663482	0.976944	0.50844	0.521648	0.626409	0.308252	1.2556	0.835422	0.656987	0.707614	0.505255	0.701853	0.494658	0.503981	0.604339	0.476917	0.565675	0.577801	475	0.168567	1	5	5	5	Hn1	Hematological and neurological expressed 1 protein	IPI00314755	IPI00314755	P97825	>IPI:IPI00314755.5|SWISS-PROT:P97825|TREMBL:A2A9X3|ENSEMBL:ENSMUSP00000021083|REFSEQ:NP_032284|VEGA:OTTMUSP00000003503 Tax_Id=10090 Gene_Symbol=Hn1 Hematological and neurological expressed 1 protein
1.75134	2.04344	2.21185	0.338055	2.52035	4.77897	2.6528	0.853461	2.21082	1.28282	1.95442	0.803277	0.833611	1.9835	5.89414	2.23005	2.07978	NaN	NaN	3.11488	1.42562	3.56735	3.75615	2.11842	476	0.622976	1	5	5	5	Fabp7	Fatty acid-binding protein, brain	IPI00227585	IPI00227585	P51880	>IPI:IPI00227585.6|SWISS-PROT:P51880|TREMBL:Q5NDA4|ENSEMBL:ENSMUSP00000020024|REFSEQ:NP_067247 Tax_Id=10090 Gene_Symbol=Fabp7 Fatty acid-binding protein, brain
0.519696	0.745212	1.00942	0.963484	NaN	0.787836	0.719942	1.15047	NaN	0.808734	NaN	NaN	1.56292	0.942241	0.85034	0.928591	0.961723	0.916842	0.671366	0.859697	0.754489	0.748783	NaN	0.679256	477	0.360012	1	4	4	4	Dnajb1	DnaJ homolog subfamily B member 1	IPI00136253	IPI00136253	Q9QYJ3	>IPI:IPI00136253.3|SWISS-PROT:Q9QYJ3|TREMBL:Q3TIT6;Q3TU79;Q3TYL7|ENSEMBL:ENSMUSP00000005620|REFSEQ:NP_061278 Tax_Id=10090 Gene_Symbol=Dnajb1 DnaJ homolog subfamily B member 1
6.01504	2.81777	3.88124	5.2293	2.95727	4.07897	5.58878	3.12149	4.80031	4.38616	NaN	NaN	4.84027	2.47341	6.38244	3.64764	6.53168	5.04058	4.72456	1.72292	4.63585	2.4178	5.59785	2.06539	478	0.953294	1	4	4	4	Cox6a1	Cytochrome c oxidase polypeptide VIa	IPI00121443	IPI00121443	P43024	>IPI:IPI00121443.1|SWISS-PROT:P43024|TREMBL:Q9DCW5|ENSEMBL:ENSMUSP00000047661|REFSEQ:NP_031774|VEGA:OTTMUSP00000015557 Tax_Id=10090 Gene_Symbol=Cox6a1 Cytochrome c oxidase polypeptide VIa
2.65731	NaN	4.12048	NaN	4.96574	4.02803	3.86354	4.73373	3.23855	3.96401	NaN	3.1953	4.61361	3.49565	3.19132	0.965065	NaN	5.54508	2.99097	NaN	4.07083	3.85564	NaN	NaN	479	0.624823	1	2	13	2	Snap25	Isoform SNAP-25a of Synaptosomal-associated protein 25	IPI00225389	IPI00225389	P60879-2	>IPI:IPI00225389.1|SWISS-PROT:P60879-2|ENSEMBL:ENSMUSP00000105725|VEGA:OTTMUSP00000016583 Tax_Id=10090 Gene_Symbol=Snap25 Isoform SNAP-25a of Synaptosomal-associated protein 25
7.61093	5.6899	6.2317	4.8962	6.1207	8.70473	5.24576	4.59982	8.33403	9.89707	8.70019	10.195	3.71941	5.97479	9.49758	7.23955	5.68925	6.71998	10.8485	7.79666	6.50195	9.42596	10.8828	8.99524	480	0.0883047	1	13	13	1	Snap25	Isoform SNAP-25b of Synaptosomal-associated protein 25	IPI00125635	IPI00125635	P60879-1	>IPI:IPI00125635.1|SWISS-PROT:P60879-1|ENSEMBL:ENSMUSP00000028727|REFSEQ:NP_035558|VEGA:OTTMUSP00000016582 Tax_Id=10090 Gene_Symbol=Snap25 Isoform SNAP-25b of Synaptosomal-associated protein 25
2.66312	5.61546	3.34638	NaN	2.53081	NaN	5.80686	NaN	6.2162	4.51692	4.80215	4.22369	7.61673	3.93453	10.6445	5.89171	NaN	4.04744	NaN	6.84744	NaN	1.59112	2.18298	6.1282	481	0.250024	1	4	4	4	Avp	Vasopressin-neurophysin 2-copeptin	IPI00118471	IPI00118471	P35455	>IPI:IPI00118471.1|SWISS-PROT:P35455|TREMBL:Q3UUQ5|ENSEMBL:ENSMUSP00000035551|REFSEQ:NP_033862|VEGA:OTTMUSP00000016544 Tax_Id=10090 Gene_Symbol=Avp Vasopressin-neurophysin 2-copeptin
0.215936	0.376747	0.411201	0.472255	0.276947	0.325574	0.262515	0.296947	0.306937	0.449843	0.307967	0.307031	0.408147	0.348639	0.254375	0.409651	0.35926	0.311983	0.272472	0.323824	0.277047	0.264236	0.320103	0.310849	482	0.561239	3	16;16;16	16	16	Rpn2	Putative uncharacterized protein	IPI00889811;IPI00475154;IPI00754992	IPI00889811;IPI00475154;IPI00754992	Q3U505	>IPI:IPI00889811.1|TREMBL:Q3U505|ENSEMBL:ENSMUSP00000099417 Tax_Id=10090 Gene_Symbol=Rpn2 Putative uncharacterized protein;>IPI:IPI00475154.1|SWISS-PROT:Q9DBG6|TREMBL:Q61833|ENSEMBL:ENSMUSP00000112081|REFSEQ:NP_062616|VEGA:OTTMUSP00000017300 Tax_Id=10090 G
1.85767	2.47954	2.63922	3.0206	2.26917	2.39338	2.46027	2.61376	2.08195	2.45857	1.83093	1.9223	2.2898	2.42854	2.54175	2.32802	2.72302	2.56108	1.77756	2.66745	2.37451	2.06723	2.36871	1.95038	483	0.407465	2	14;3	14	14	Psmd5	26S proteasome non-ATPase regulatory subunit 5	IPI00457661	IPI00457661;IPI00890183	Q8BJY1	>IPI:IPI00457661.5|SWISS-PROT:Q8BJY1|TREMBL:Q921U5|ENSEMBL:ENSMUSP00000028225|REFSEQ:NP_542121|VEGA:OTTMUSP00000012919 Tax_Id=10090 Gene_Symbol=Psmd5 26S proteasome non-ATPase regulatory subunit 5
0.355986	0.648635	0.635243	0.670871	0.442067	0.470345	0.446628	0.624337	0.450958	0.564717	0.444365	0.461404	0.608902	0.448772	0.463714	0.536279	0.508906	0.600962	0.333222	0.464598	0.464317	0.385802	0.511274	0.501454	484	0.747463	1	34	37	34	HSPA5		IPI00319992	IPI00319992	P20029	>IPI:IPI00319992.1|SWISS-PROT:P20029|TREMBL:A2AUF6;Q3TI47;Q3TKF8;Q3TUS2;Q3TWF2;Q3U6V3;Q3U7T8;Q3U9G2;Q3UEM8;Q9DC41|ENSEMBL:ENSMUSP00000028222;ENSMUSP00000097747|REFSEQ:NP_001156906;NP_071705|VEGA:OTTMUSP00000012896;OTTMUSP00000012897 Tax_Id=10090 Gene_Symbo
1.15168	1.29735	1.78677	1.89645	1.44161	1.48732	1.45378	2.00977	1.38883	1.56823	1.43484	1.33356	1.77138	1.94062	1.82825	1.84665	1.62475	1.76982	1.30666	1.67068	1.50324	1.54614	1.68339	1.47334	485	0.209419	1	7	7	7	Chordc1	Cysteine and histidine-rich domain-containing protein 1	IPI00134017	IPI00134017	Q9D1P4	>IPI:IPI00134017.1|SWISS-PROT:Q9D1P4|ENSEMBL:ENSMUSP00000001825|REFSEQ:NP_080120 Tax_Id=10090 Gene_Symbol=Chordc1 Cysteine and histidine-rich domain-containing protein 1
0.0800256	0.104219	0.117141	0.148969	0.0761673	0.0843028	0.068975	0.0462171	0.0522712	0.0882535	0.0856604	0.0851571	0.148936	0.153275	0.0653082	0.0859845	0.0843739	0.101981	0.0801732	0.0796749	0.0554293	0.0835771	0.0994926	0.0852733	486	0.12933	1	8	8	2	Rbm3	Putative	IPI00130883	IPI00130883	O89086	>IPI:IPI00130883.1|SWISS-PROT:O89086|TREMBL:Q545K5;Q5RJV3|ENSEMBL:ENSMUSP00000111277;ENSMUSP00000111282;ENSMUSP00000111284|REFSEQ:NP_001159882;NP_001159883|VEGA:OTTMUSP00000019622;OTTMUSP00000019633;OTTMUSP00000019637 Tax_Id=10090 Gene_Symbol=Rbm3 Putative
1.75389	2.24593	2.32791	2.6763	2.29216	2.61766	2.65802	2.67888	2.50985	2.51162	2.4246	2.2142	2.14601	2.76602	2.72524	2.83326	2.34412	2.73456	1.93671	2.49004	2.3015	2.21661	2.65527	2.4115	487	0.489858	1	15	29	1	Ap1b1	Putative uncharacterized protein	IPI00648683	IPI00648683	O35643	>IPI:IPI00648683.3|SWISS-PROT:O35643|TREMBL:Q3TVN4;Q3U1K9;Q5SVG4;Q8CC13|ENSEMBL:ENSMUSP00000070598;ENSMUSP00000099134|VEGA:OTTMUSP00000005282 Tax_Id=10090 Gene_Symbol=Ap1b1 Putative uncharacterized protein
4.36015	3.21275	2.78048	2.61965	3.0911	2.17538	3.89924	NaN	3.33233	3.54296	4.2757	3.31851	1.83884	1.45273	1.85034	2.78156	2.16193	1.40903	6.33794	20.0618	3.40588	1.85432	2.36731	5.60004	488	0.482368	8	10;4;1;1;1;1;1;1	10	9	Serpina3k; Mcm2; Spi2	Serine protease inhibitor A3K	IPI00131830	IPI00131830;IPI00135635;IPI00330683;IPI00753177;IPI00314141;IPI00128076;IPI00355673;IPI00889814	P07759	>IPI:IPI00131830.1|SWISS-PROT:P07759|ENSEMBL:ENSMUSP00000042095|REFSEQ:NP_035588 Tax_Id=10090 Gene_Symbol=Serpina3k Serine protease inhibitor A3K
5.5894	5.31774	3.53045	6.8653	4.82556	5.57973	2.79846	3.6626	2.58859	3.71182	7.78271	6.15196	2.08956	3.36632	2.53062	12.9276	5.33988	4.45712	4.30979	6.4952	3.93159	8.26651	5.29325	9.87849	489	0.695251	2	8;7	8	8	Cryab	Alpha-crystallin B chain	IPI00138274;IPI00875000	IPI00138274;IPI00875000	P23927	>IPI:IPI00138274.1|SWISS-PROT:P23927|TREMBL:Q52L78|ENSEMBL:ENSMUSP00000091371|REFSEQ:NP_034094 Tax_Id=10090 Gene_Symbol=Cryab Alpha-crystallin B chain;>IPI:IPI00875000.1|ENSEMBL:ENSMUSP00000034562 Tax_Id=10090 Gene_Symbol=Cryab 13 kDa protein
0.512164	0.706914	0.715205	0.852733	0.319601	0.207805	0.450999	0.374434	0.449681	NaN	NaN	0.348383	1.43777	0.692233	0.216849	NaN	0.630159	0.468604	0.392619	0.707264	0.538706	NaN	NaN	0.603318	490	0.277982	3	4;1;1	4	4	Cnn3	Calponin-3	IPI00119111	IPI00119111;IPI00116649;IPI00830538	Q9DAW9	>IPI:IPI00119111.2|SWISS-PROT:Q9DAW9|TREMBL:Q99JN5|ENSEMBL:ENSMUSP00000029773|REFSEQ:NP_082320 Tax_Id=10090 Gene_Symbol=Cnn3 Calponin-3
4.71231	2.21043	1.69546	2.32861	1.61507	3.06617	3.29413	NaN	NaN	1.10026	0.784683	3.56608	1.67664	2.84446	3.4408	4.03323	NaN	1.13478	0.667958	4.76259	0.531463	2.44648	NaN	NaN	491	0.502482	10	3;3;3;3;3;3;3;3;3;1	3	3	LOC100046035;Adam23; Mdc3	similar to ADAM23	IPI00849661;IPI00648288;IPI00129175;IPI00458023;IPI00458025;IPI00649891;IPI00480277;IPI00650001;IPI00648033	IPI00849661;IPI00648288;IPI00129175;IPI00458023;IPI00458025;IPI00649891;IPI00480277;IPI00650001;IPI00648033;IPI00648758	Q8CC33;Q6QDY9;Q6QDZ0;Q5SRA2;Q8CCI7;Q5SRA3;Q5SRA4;Q9R1V7	>IPI:IPI00849661.1|REFSEQ:XP_001475491 Tax_Id=10090 Gene_Symbol=LOC100046035 similar to ADAM23;>IPI:IPI00648288.1|TREMBL:Q5SRA0|ENSEMBL:ENSMUSP00000109738|REFSEQ:NP_001171071|VEGA:OTTMUSP00000001725;OTTMUSP00000002474 Tax_Id=10090 Gene_Symbol=Adam23 disint
6.28891	1.73512	7.27008	4.75466	3.76011	7.78998	7.27855	NaN	2.65979	3.93561	6.55867	7.96305	2.86829	3.55505	3.88124	2.82701	5.64494	5.16956	5.41653	5.22849	1.50777	0.162859	NaN	4.23083	492	0.0579685	7	18;17;17;16;3;1;1	18	18	Nrcam	Isoform 2 of Neuronal cell adhesion molecule	IPI00338880;IPI00395042;IPI00403536;IPI00876075	IPI00338880;IPI00395042;IPI00403536;IPI00876075;IPI00850384;IPI00226573;IPI00395043	Q810U4-2	>IPI:IPI00338880.3|SWISS-PROT:Q810U4-2|TREMBL:Q6P9Y5|ENSEMBL:ENSMUSP00000106378|REFSEQ:NP_001139503 Tax_Id=10090 Gene_Symbol=Nrcam Isoform 2 of Neuronal cell adhesion molecule;>IPI:IPI00395042.1|SWISS-PROT:Q810U4-3|ENSEMBL:ENSMUSP00000106379 Tax_Id=10090 G
5.69476	3.40171	1.84932	4.03698	0.161601	3.03104	8.65951	3.96904	6.93193	2.67387	NaN	NaN	1.90509	5.92592	6.54065	7.70416	4.93974	5.19777	2.85331	0.825559	9.06947	16.0573	12.4205	2.07044	493	0.525861	6	14;14;14;13;13;2	14	13	Sh3glb2	SH3-domain GRB2-like endophilin B2	IPI00756786;IPI00626834;IPI00153832;IPI00169647;IPI00828453	IPI00756786;IPI00626834;IPI00153832;IPI00169647;IPI00828453;IPI00857298	A2AWI7	>IPI:IPI00756786.1|TREMBL:A2AWI7|ENSEMBL:ENSMUSP00000109251|VEGA:OTTMUSP00000018202 Tax_Id=10090 Gene_Symbol=Sh3glb2 SH3-domain GRB2-like endophilin B2;>IPI:IPI00626834.2|SWISS-PROT:Q8R3V5-4|TREMBL:B0LDS3|ENSEMBL:ENSMUSP00000097788|VEGA:OTTMUSP00000018200
3.16105	3.46021	8.285	2.24911	9.7229	4.24232	2.81627	7.44879	NaN	5.95593	5.3118	NaN	0.835143	1.48931	5.02715	2.24432	4.07116	3.50828	18.4757	9.3985	6.29604	4.23693	NaN	10.7447	494	0.0967407	1	6	6	6	Hepacam	Hepatocyte cell adhesion molecule	IPI00471176	IPI00471176	Q640R3	>IPI:IPI00471176.2|SWISS-PROT:Q640R3|TREMBL:B2RSY3|ENSEMBL:ENSMUSP00000054105|REFSEQ:NP_780398|VEGA:OTTMUSP00000018225 Tax_Id=10090 Gene_Symbol=Hepacam Hepatocyte cell adhesion molecule
2.43126	3.72551	2.30862	2.72948	5.30926	NaN	5.64238	5.90807	NaN	3.32945	3.09463	NaN	2.11995	NaN	13.077	3.25235	NaN	NaN	NaN	1.05694	1.11436	8.30565	3.4534	NaN	495	0.616649	1	6	6	6	Rab9b	Ras-related protein Rab-9B	IPI00221865	IPI00221865	Q8BHH2	>IPI:IPI00221865.1|SWISS-PROT:Q8BHH2|TREMBL:Q3KNA5|ENSEMBL:ENSMUSP00000049739|REFSEQ:NP_795945|VEGA:OTTMUSP00000020360 Tax_Id=10090 Gene_Symbol=Rab9b Ras-related protein Rab-9B
0.548607	0.127667	7.59302	4.49155	1.0002	0.376591	8.09061	1.51763	NaN	0.654407	1.63396	NaN	9.77517	NaN	0.0735511	0.260159	2.79306	NaN	NaN	2.53056	0.0650533	0.3429	NaN	NaN	496	0.583374	1	5	25	5	Tubb6	Tubulin beta-6 chain	IPI00122928	IPI00122928	Q922F4	>IPI:IPI00122928.1|SWISS-PROT:Q922F4|TREMBL:Q3U9U3;Q3UMM1;Q9CUN8|ENSEMBL:ENSMUSP00000001513|REFSEQ:NP_080749 Tax_Id=10090 Gene_Symbol=Tubb6 Tubulin beta-6 chain
2.5997	2.85063	3.13116	NaN	2.49838	2.74379	2.66738	3.49394	2.03314	NaN	NaN	NaN	2.91817	1.48432	2.88834	2.99733	2.59027	2.49613	2.63992	3.16196	2.22346	1.67653	2.39952	2.54239	497	0.360239	9	5;5;5;5;5;5;5;5;3	5	5	Tpd52	tumor protein D52 isoform 1	IPI00625441;IPI00473743;IPI00881225;IPI00622833;IPI00622606;IPI00408626;IPI00882249;IPI00880888;IPI00880327	IPI00625441;IPI00473743;IPI00881225;IPI00622833;IPI00622606;IPI00408626;IPI00882249;IPI00880888;IPI00880327	D3Z2U2;F8WHQ1	>IPI:IPI00625441.3|ENSEMBL:ENSMUSP00000091943|REFSEQ:NP_001020432|VEGA:OTTMUSP00000034665 Tax_Id=10090 Gene_Symbol=Tpd52 tumor protein D52 isoform 1;>IPI:IPI00473743.5|SWISS-PROT:Q62393-1|ENSEMBL:ENSMUSP00000088913|REFSEQ:NP_001020433|VEGA:OTTMUSP000000346
2.04227	NaN	NaN	4.79662	3.27633	3.76676	5.15358	3.89955	3.1745	3.56939	4.06157	2.58846	3.63451	3.82936	3.58693	3.78243	NaN	4.65138	2.86541	3.37405	3.47451	3.88531	4.12065	3.18188	498	0.810353	7	8;8;7;7;7;7;7	8	8	Cit	Putative uncharacterized protein Cit	IPI00776107;IPI00756265;IPI00655040;IPI00406762;IPI00956788;IPI00655108;IPI00272387	IPI00776107;IPI00756265;IPI00655040;IPI00406762;IPI00956788;IPI00655108;IPI00272387	D3Z1U0	>IPI:IPI00776107.1|TREMBL:D3Z1U0|ENSEMBL:ENSMUSP00000107639|VEGA:OTTMUSP00000018398 Tax_Id=10090 Gene_Symbol=Cit Putative uncharacterized protein Cit;>IPI:IPI00756265.1|ENSEMBL:ENSMUSP00000115802|VEGA:OTTMUSP00000015603 Tax_Id=10090 Gene_Symbol=Cit Protein
1.69039	2.07151	2.69738	3.33912	2.07905	2.56043	2.5161	2.37999	2.57612	2.23194	2.319	1.87839	2.05015	1.98946	2.44141	2.99635	2.59572	2.80285	1.97297	2.13197	2.17344	2.34555	2.10345	2.19438	499	0.980831	2	8;7	8	8	Ogt	Isoform 2 of UDP-N-acetylglucosamine--peptide N-acetylglucosaminyltransferase 110 kDa subunit	IPI00845528;IPI00420870	IPI00845528;IPI00420870	Q8CGY8-2	>IPI:IPI00845528.1|SWISS-PROT:Q8CGY8-2|TREMBL:Q80XU6|ENSEMBL:ENSMUSP00000113454|VEGA:OTTMUSP00000019750 Tax_Id=10090 Gene_Symbol=Ogt Isoform 2 of UDP-N-acetylglucosamine--peptide N-acetylglucosaminyltransferase 110 kDa subunit;>IPI:IPI00420870.4|SWISS-PROT
1.0041	1.28773	1.17729	1.7188	1.5075	1.47187	1.53341	NaN	1.52309	2.0743	1.67873	1.62784	1.15869	1.14364	1.48463	1.50263	1.27584	1.64347	1.26266	1.08558	1.48683	1.15068	1.25109	0.976277	500	0.0713418	3	8;3;1	8	8	Cep170	Isoform 1 of Centrosomal protein of 170 kDa	IPI00667973	IPI00667973;IPI00620148;IPI00407623	Q6A065-1	>IPI:IPI00667973.3|SWISS-PROT:Q6A065-1|ENSEMBL:ENSMUSP00000059562|REFSEQ:NP_001093107;XP_994962 Tax_Id=10090 Gene_Symbol=Cep170 Isoform 1 of Centrosomal protein of 170 kDa
0.305708	0.449216	0.533333	0.660808	0.553771	0.483723	0.475353	0.720098	0.443105	0.583192	0.397994	0.445732	0.922254	0.433802	0.388319	0.495417	0.484426	0.568473	0.396259	0.39976	0.438885	0.384512	0.564334	0.55145	501	0.864626	3	7;7;7	7	7	Srp68	Signal recognition particle 68 kDa protein	IPI00222977;IPI00828223;IPI00649821	IPI00222977;IPI00828223;IPI00649821	Q8BMA6	>IPI:IPI00222977.1|SWISS-PROT:Q8BMA6 Tax_Id=10090 Gene_Symbol=Srp68 Signal recognition particle 68 kDa protein;>IPI:IPI00828223.1|TREMBL:A2AAN1|ENSEMBL:ENSMUSP00000021133|REFSEQ:NP_666144|VEGA:OTTMUSP00000004085 Tax_Id=10090 Gene_Symbol=Srp68 Signal recogn
0.37955	0.662998	0.752049	0.856678	NaN	0.691467	0.707164	0.914244	0.634035	0.81367	0.654022	0.511745	1.33576	0.661113	0.566508	0.663042	0.767636	0.698617	0.362963	0.651933	0.585995	0.574119	0.632391	0.522548	502	0.657471	2	7;7	7	7	Cars	Isoform 1 of Cysteinyl-tRNA synthetase, cytoplasmic	IPI00331422;IPI00410740	IPI00331422;IPI00410740	Q9ER72-1	>IPI:IPI00331422.4|SWISS-PROT:Q9ER72-1|TREMBL:Q3UXN3|ENSEMBL:ENSMUSP00000010899|REFSEQ:NP_038770|VEGA:OTTMUSP00000028486 Tax_Id=10090 Gene_Symbol=Cars Isoform 1 of Cysteinyl-tRNA synthetase, cytoplasmic;>IPI:IPI00410740.1|SWISS-PROT:Q9ER72-2|TREMBL:Q3U716;
0.810438	0.852806	0.999101	1.04853	0.862962	0.928936	0.851281	0.972952	0.775374	0.884721	0.83696	0.704722	2.00533	1.09266	0.797257	0.8371	0.933097	1.02809	0.785176	0.828844	0.757289	0.620732	0.764117	0.829807	503	0.150562	3	7;3;1	7	7	Tbcd	Tubulin-specific chaperone D	IPI00461857	IPI00461857;IPI00668289;IPI00649721	Q8BYA0	>IPI:IPI00461857.2|SWISS-PROT:Q8BYA0|TREMBL:A2AAV4;Q8R199|ENSEMBL:ENSMUSP00000099302|REFSEQ:NP_084154|VEGA:OTTMUSP00000005000 Tax_Id=10090 Gene_Symbol=Tbcd Tubulin-specific chaperone D
2.45779	2.5742	2.93582	1.93304	2.90217	3.27708	3.39236	1.97887	3.84867	4.6966	2.32191	3.42795	2.51433	2.67673	3.64684	2.93582	2.34802	2.3876	2.8551	1.95699	3.22612	2.79283	1.8205	3.19928	504	0.241704	3	7;1;1	7	7	Esd	S-formylglutathione hydrolase	IPI00109142	IPI00109142;IPI00461665;IPI00850487	Q9R0P3	>IPI:IPI00109142.4|SWISS-PROT:Q9R0P3|ENSEMBL:ENSMUSP00000022573|REFSEQ:NP_058599 Tax_Id=10090 Gene_Symbol=Esd S-formylglutathione hydrolase
1.38833	NaN	2.54654	2.7894	1.84826	2.33323	1.95027	2.08013	1.72712	2.06962	1.74331	1.50412	4.2517	2.87853	2.19703	2.54868	2.34318	NaN	0.962186	2.0227	1.77044	1.56133	NaN	0.340425	505	0.0926551	2	6;6	6	6	Ptpn23	Isoform 1 of Tyrosine-protein phosphatase non-receptor type 23	IPI00464166;IPI00606716	IPI00464166;IPI00606716	Q6PB44-1	>IPI:IPI00464166.2|SWISS-PROT:Q6PB44-1|ENSEMBL:ENSMUSP00000039580|REFSEQ:NP_001074512 Tax_Id=10090 Gene_Symbol=Ptpn23 Isoform 1 of Tyrosine-protein phosphatase non-receptor type 23;>IPI:IPI00606716.2|SWISS-PROT:Q6PB44-2 Tax_Id=10090 Gene_Symbol=Ptpn23 Isof
0.811425	1.06946	1.2603	1.15375	1.13171	1.20922	1.02396	1.69334	0.85778	1.14695	0.982511	0.866476	1.49134	1.08995	0.876808	1.06199	1.27121	1.50231	1.27939	1.05553	1.22678	1.11005	1.35566	1.02662	506	0.260051	2	6;6	6	6	Bcap31	B-cell receptor-associated protein 31	IPI00230422;IPI00828225	IPI00230422;IPI00828225	Q61335	>IPI:IPI00230422.6|SWISS-PROT:Q61335 Tax_Id=10090 Gene_Symbol=Bcap31 B-cell receptor-associated protein 31;>IPI:IPI00828225.1|TREMBL:A2ALM8;Q3U9U5|ENSEMBL:ENSMUSP00000002091|REFSEQ:NP_036190|VEGA:OTTMUSP00000019276 Tax_Id=10090 Gene_Symbol=Bcap31 B-cell re
1.04092	1.41271	1.42116	1.47167	1.37075	1.52667	1.43279	1.71538	1.43699	1.58371	1.50227	1.14626	0.90212	0.938879	0.872676	1.63967	1.35334	1.83645	0.974089	1.36452	1.35137	1.08133	1.45003	1.37408	507	0.220613	3	6;5;5	6	6	Vta1	Vacuolar protein sorting-associated protein VTA1 homolog	IPI00133024;IPI00652976;IPI00895008	IPI00133024;IPI00652976;IPI00895008	Q9CR26	>IPI:IPI00133024.1|SWISS-PROT:Q9CR26|ENSEMBL:ENSMUSP00000119829|REFSEQ:NP_079694|VEGA:OTTMUSP00000042172 Tax_Id=10090 Gene_Symbol=Vta1 Vacuolar protein sorting-associated protein VTA1 homolog;>IPI:IPI00652976.1|TREMBL:Q3V4B3|ENSEMBL:ENSMUSP00000020018;ENSM
2.35927	NaN	1.714	2.84657	2.74108	2.60274	2.78606	2.64089	2.74281	3.03591	2.07486	2.42571	2.56977	2.94048	2.93315	3.41845	3.77245	3.06795	1.99537	3.35345	2.67473	2.71437	3.01732	3.18552	508	0.312523	2	6;5	6	6	Chmp4b	Charged multivesicular body protein 4b	IPI00171974;IPI00753915	IPI00171974;IPI00753915	Q9D8B3	>IPI:IPI00171974.1|SWISS-PROT:Q9D8B3|ENSEMBL:ENSMUSP00000036206|REFSEQ:NP_083638|VEGA:OTTMUSP00000016972 Tax_Id=10090 Gene_Symbol=Chmp4b Charged multivesicular body protein 4b;>IPI:IPI00753915.2|REFSEQ:XP_981653 Tax_Id=10090 Gene_Symbol=LOC674706 similar t
7.04722	6.33272	4.88568	4.88257	7.0373	5.32595	6.97107	6.72902	5.76037	5.52334	4.52837	7.43052	5.26954	5.31406	5.66027	7.37082	5.75838	6.86342	5.54139	5.81024	7.19011	5.775	9.56023	8.10964	509	0.208086	3	6;4;4	6	6	Acaa1b;Acaa1a; Acaa1		IPI00121833;IPI00122139;IPI00222793	IPI00121833;IPI00122139;IPI00222793	Q921H8	>IPI:IPI00121833.3|SWISS-PROT:Q921H8|ENSEMBL:ENSMUSP00000042351|REFSEQ:NP_570934 Tax_Id=10090 Gene_Symbol=Acaa1b;Acaa1a 3-ketoacyl-CoA thiolase A, peroxisomal;>IPI:IPI00122139.3|SWISS-PROT:Q8VCH0|TREMBL:Q3TUU3;Q3UKM0;Q3UPU8|ENSEMBL:ENSMUSP00000010795|REFSE
0.496229	0.895175	0.82122	0.884799	0.729288	0.901957	0.869717	0.829875	0.772738	0.769231	0.668494	0.512374	1.22775	0.965904	0.763068	0.853752	0.821828	0.828706	1.05797	0.674855	0.77688	0.614326	0.810373	0.773395	510	0.237766	5	5;5;4;3;1	5	5	Emd	Emerin	IPI00114401;IPI00828496;IPI00652858;IPI00880859	IPI00114401;IPI00828496;IPI00652858;IPI00880859;IPI00881793	O08579	>IPI:IPI00114401.1|SWISS-PROT:O08579|TREMBL:Q3TIH6;Q3UJP3|ENSEMBL:ENSMUSP00000002029|REFSEQ:NP_031953|VEGA:OTTMUSP00000019267 Tax_Id=10090 Gene_Symbol=Emd Emerin;>IPI:IPI00828496.2|ENSEMBL:ENSMUSP00000094158|VEGA:OTTMUSP00000023206 Tax_Id=10090 Gene_Symbol
0.246093	0.320749	0.324538	0.420539	0.266262	0.326562	0.276281	0.32745	0.249464	0.314495	0.270951	0.256522	0.435597	0.313598	0.228118	0.304386	0.32496	0.329587	0.299473	0.328278	0.267001	0.2392	0.280104	0.285804	511	0.401343	5	10;10;6;6;6	10	5	Eif5a		IPI00108125;IPI00648714;IPI00850758;IPI00848526;IPI00331514	IPI00108125;IPI00648714;IPI00850758;IPI00848526;IPI00331514	P63242	>IPI:IPI00108125.4|SWISS-PROT:P63242|ENSEMBL:ENSMUSP00000047008;ENSMUSP00000067077;ENSMUSP00000068651;ENSMUSP00000104247;ENSMUSP00000104248;ENSMUSP00000104249;ENSMUSP00000104250;ENSMUSP00000104251;ENSMUSP00000104252;ENSMUSP00000104253|REFSEQ:NP_001160061;N
3.05792	4.12082	4.2015	2.89285	3.3539	3.50165	2.99832	2.55454	3.78673	3.38581	2.42008	1.49703	2.23759	3.7219	5.56297	4.14594	2.51181	4.92951	3.02197	2.99877	3.78	2.54641	3.45961	3.73441	512	0.602873	7	5;3;1;1;1;1;1	5	5	Hsd17b11	Isoform 1 of Estradiol 17-beta-dehydrogenase 11	IPI00110224;IPI00648201	IPI00110224;IPI00648201;IPI00122464;IPI00943415;IPI00407769;IPI00881340;IPI00881052	Q9EQ06-1	>IPI:IPI00110224.1|SWISS-PROT:Q9EQ06-1|TREMBL:A8Y5N3|ENSEMBL:ENSMUSP00000031251|REFSEQ:NP_444492|VEGA:OTTMUSP00000033162 Tax_Id=10090 Gene_Symbol=Hsd17b11 Isoform 1 of Estradiol 17-beta-dehydrogenase 11;>IPI:IPI00648201.1|SWISS-PROT:Q9EQ06-2|TREMBL:A8Y5N2|
1.01642	1.62798	1.66215	1.89779	1.42619	1.24553	1.28021	1.58765	1.4072	1.59923	1.3352	1.39599	2.20575	1.51451	1.36672	1.58526	1.6984	1.63364	0.882924	1.48679	1.44766	1.21809	1.33355	1.60686	513	0.796155	3	8;6;1	8	5	Kpna3	Importin subunit alpha-3	IPI00230429;IPI00135150	IPI00230429;IPI00135150;REV__IPI00381383	O35344	>IPI:IPI00230429.4|SWISS-PROT:O35344|TREMBL:Q543M7|ENSEMBL:ENSMUSP00000022496|REFSEQ:NP_032492 Tax_Id=10090 Gene_Symbol=Kpna3 Importin subunit alpha-3;>IPI:IPI00135150.4|TREMBL:Q9CT07|ENSEMBL:ENSMUSP00000056564 Tax_Id=10090 Gene_Symbol=Kpna3 Putative uncha
1.53252	1.81868	2.48059	2.42589	1.90538	2.09608	1.84618	1.74505	NaN	2.51807	NaN	1.67625	NaN	1.08306	2.02926	1.79269	NaN	2.88176	1.80502	2.37846	1.66945	1.35358	1.94871	2.04065	514	0.390928	3	4;4;2	4	4	Mcts1	Isoform 2 of Malignant T cell-amplified sequence 1	IPI00626860;IPI00874436;IPI00131888	IPI00626860;IPI00874436;IPI00131888	Q9DB27-2	>IPI:IPI00626860.1|SWISS-PROT:Q9DB27-2|ENSEMBL:ENSMUSP00000110768 Tax_Id=10090 Gene_Symbol=Mcts1 Isoform 2 of Malignant T cell-amplified sequence 1;>IPI:IPI00874436.1|SWISS-PROT:Q9DB27-1|ENSEMBL:ENSMUSP00000000365|REFSEQ:NP_081178|VEGA:OTTMUSP00000018754 T
0.602047	0.785546	0.897263	1.28062	0.847242	0.841043	0.948857	1.16207	0.741895	1.05656	0.879121	0.812216	0.655566	0.780275	0.690703	0.668762	0.994728	1.04981	0.718339	0.962557	0.93423	0.817528	0.997307	0.860141	515	0.232942	3	4;3;3	4	4	Kpna1	Importin subunit alpha-1	IPI00311329;IPI00649329;IPI00850733	IPI00311329;IPI00649329;IPI00850733	Q60960	>IPI:IPI00311329.1|SWISS-PROT:Q60960|ENSEMBL:ENSMUSP00000004054|REFSEQ:NP_032491 Tax_Id=10090 Gene_Symbol=Kpna1 Importin subunit alpha-1;>IPI:IPI00649329.3|SWISS-PROT:O35345|TREMBL:Q8BH30|ENSEMBL:ENSMUSP00000099650|REFSEQ:NP_032494|VEGA:OTTMUSP00000009929;
0.648172	0.899604	1.1987	1.01931	0.767754	0.933707	0.899442	0.951656	0.745935	0.97704	0.919118	0.908595	1.00732	0.83375	0.583942	0.807428	0.906701	0.9999	0.516849	0.943307	0.783147	0.68157	0.820143	0.760803	516	0.739992	3	4;1;1	4	4	Pycr2	Pyrroline-5-carboxylate reductase 2	IPI00123278	IPI00123278;IPI00123510;IPI00648009	Q922Q4	>IPI:IPI00123278.1|SWISS-PROT:Q922Q4|TREMBL:Q3TJ21;Q3TMZ1|ENSEMBL:ENSMUSP00000027802|REFSEQ:NP_598466 Tax_Id=10090 Gene_Symbol=Pycr2 Pyrroline-5-carboxylate reductase 2
1.44134	1.66497	1.55487	1.79817	1.58821	NaN	NaN	NaN	1.36073	NaN	1.28404	NaN	NaN	1.93498	1.30258	1.57783	1.55741	NaN	1.11429	1.47549	NaN	1.00548	NaN	1.41957	517	0.24493	4	3;3;2;2	3	3	Acss2	Acyl-CoA synthetase short-chain family member 2	IPI00752027;IPI00876536;IPI00409019;IPI00330302	IPI00752027;IPI00876536;IPI00409019;IPI00330302	A2AQN4	>IPI:IPI00752027.1|TREMBL:A2AQN4|ENSEMBL:ENSMUSP00000099431|VEGA:OTTMUSP00000017223 Tax_Id=10090 Gene_Symbol=Acss2 Acyl-CoA synthetase short-chain family member 2;>IPI:IPI00876536.1|TREMBL:Q8BK97;Q8BY91;Q8C141;Q8C1A8;Q8N9U3|ENSEMBL:ENSMUSP00000029135|REFSE
0.182809	0.258612	0.262309	0.286057	0.191329	0.216506	0.218174	0.214869	0.166889	0.182825	0.160519	0.157408	0.356062	0.210278	0.201321	0.221705	0.259007	0.281706	0.151309	0.210739	0.188019	0.110857	0.190165	0.256627	518	0.152885	2	3;3	3	3	Anp32e	Isoform 1 of Acidic leucine-rich nuclear phosphoprotein 32 family member E	IPI00130016;IPI00277026	IPI00130016;IPI00277026	P97822-1	>IPI:IPI00130016.1|SWISS-PROT:P97822-1|TREMBL:Q3TX26|ENSEMBL:ENSMUSP00000015893|REFSEQ:NP_075699 Tax_Id=10090 Gene_Symbol=Anp32e Isoform 1 of Acidic leucine-rich nuclear phosphoprotein 32 family member E;>IPI:IPI00277026.1|SWISS-PROT:P97822-2 Tax_Id=10090
2.50313	2.66631	3.12911	4.34179	3.47814	3.46021	3.1249	3.95867	3.25606	3.52386	3.27998	3.03003	2.60403	4.51549	3.97867	3.65631	3.63941	3.52535	3.77359	2.60017	3.23394	3.01686	3.41565	2.92295	519	0.738555	2	8;8	8	3	Arl8a	ADP-ribosylation factor-like protein 8A	IPI00124610;IPI00885811	IPI00124610;IPI00885811	Q8VEH3	>IPI:IPI00124610.1|SWISS-PROT:Q8VEH3|ENSEMBL:ENSMUSP00000027684|REFSEQ:NP_081099|VEGA:OTTMUSP00000024647 Tax_Id=10090 Gene_Symbol=Arl8a ADP-ribosylation factor-like protein 8A;>IPI:IPI00885811.1|ENSEMBL:ENSMUSP00000121545|VEGA:OTTMUSP00000024648 Tax_Id=100
1.13581	2.38277	NaN	2.5271	1.8792	1.62253	1.78355	2.18317	1.52024	1.8938	1.46154	1.33005	2.07796	1.56814	1.3331	1.03773	1.94799	1.97628	0.923446	2.05031	1.91512	1.42481	1.86686	1.5419	520	0.755343	2	2;2	8	2	Ppp1cc	Isoform Gamma-2 of Serine/threonine-protein phosphatase PP1-gamma catalytic subunit	IPI00227773;IPI00123862	IPI00227773;IPI00123862	P63087-2	>IPI:IPI00227773.1|SWISS-PROT:P63087-2|TREMBL:Q3U7K1|ENSEMBL:ENSMUSP00000083474|VEGA:OTTMUSP00000017568 Tax_Id=10090 Gene_Symbol=Ppp1cc Isoform Gamma-2 of Serine/threonine-protein phosphatase PP1-gamma catalytic subunit;>IPI:IPI00123862.1|SWISS-PROT:P63087
1.53184	1.96998	2.37806	2.21882	1.35126	1.55695	NaN	2.2309	NaN	1.94122	1.90273	NaN	2.89268	2.297	1.94617	2.16666	2.11113	2.04144	NaN	1.63994	2.18828	NaN	NaN	NaN	521	0.314771	2	2;1	2	2	Ccdc104	Coiled-coil domain-containing protein 104	IPI00226249;IPI00515194	IPI00226249;IPI00515194	Q8C6E0	>IPI:IPI00226249.1|SWISS-PROT:Q8C6E0|TREMBL:Q99JR9|ENSEMBL:ENSMUSP00000020754|REFSEQ:NP_080016|VEGA:OTTMUSP00000005492 Tax_Id=10090 Gene_Symbol=Ccdc104 Coiled-coil domain-containing protein 104;>IPI:IPI00515194.1|TREMBL:Q5SNY8|ENSEMBL:ENSMUSP00000090929;EN
0.262854	0.419498	0.465593	0.467203	0.369181	0.396024	0.346512	0.494364	0.331192	0.38088	0.340507	0.348226	0.646412	0.362897	0.304488	0.414096	0.414921	0.394368	0.287803	0.347512	0.318746	0.294655	0.363346	0.327022	522	0.525527	5	19;19;18;18;6	19	19	Eif4g1	Isoform 1 of Eukaryotic translation initiation factor 4 ga	IPI00421179;IPI00856453;IPI00858249;IPI00515195	IPI00421179;IPI00856453;IPI00858249;IPI00515195;IPI00856164	Q6NZJ6-1	>IPI:IPI00421179.1|SWISS-PROT:Q6NZJ6-1|TREMBL:Q3UTK0;Q3UYM6|ENSEMBL:ENSMUSP00000047678;ENSMUSP00000111120|REFSEQ:NP_666053|VEGA:OTTMUSP00000029085;OTTMUSP00000029549 Tax_Id=10090 Gene_Symbol=Eif4g1 Isoform 1 of Eukaryotic translation initiation factor 4 ga
9.10747	4.17171	4.15282	7.20928	10.1904	6.49815	7.52502	5.05	6.79717	6.27156	4.34348	6.73355	2.16113	4.4484	6.9185	6.10054	6.07275	6.85072	9.18442	4.9985	7.74234	8.83471	8.53534	8.70625	523	0.178187	4	20;17;16;2	20	18	Bin1	Isoform 1 of Myc box-dependent-interacting protein 1	IPI00114352;IPI00458777;IPI00282748	IPI00114352;IPI00458777;IPI00282748;IPI00752684	O08539-1	>IPI:IPI00114352.1|SWISS-PROT:O08539-1|ENSEMBL:ENSMUSP00000025239|REFSEQ:NP_033798 Tax_Id=10090 Gene_Symbol=Bin1 Isoform 1 of Myc box-dependent-interacting protein 1;>IPI:IPI00458777.2|TREMBL:Q6P1B9|ENSEMBL:ENSMUSP00000089590|REFSEQ:NP_001076803 Tax_Id=100
0.349675	0.561356	0.594248	0.724323	0.474091	0.518726	0.439734	0.675219	0.472657	0.521975	0.442889	0.435844	0.908843	0.580215	0.497215	0.633834	0.568182	0.665779	0.470168	0.461191	0.465918	0.412082	0.50638	0.476055	524	0.281924	3	17;17;1	17	17	Upf1	Isoform 1 of Regulator of nonsense transcripts 1	IPI00420949;IPI00850525	IPI00420949;IPI00850525;IPI00224915	Q9EPU0-1	>IPI:IPI00420949.3|SWISS-PROT:Q9EPU0-1|ENSEMBL:ENSMUSP00000075089|REFSEQ:NP_001116301 Tax_Id=10090 Gene_Symbol=Upf1 Isoform 1 of Regulator of nonsense transcripts 1;>IPI:IPI00850525.1|SWISS-PROT:Q9EPU0-2|REFSEQ:NP_109605 Tax_Id=10090 Gene_Symbol=Upf1 Isofo
2.01877	2.47115	2.16722	2.0071	2.06671	1.71945	1.73659	1.82362	2.05246	2.35799	1.70608	2.1485	2.7635	1.67591	2.52595	2.41348	2.28645	2.39492	2.23579	2.20975	1.96912	1.75193	2.08438	2.63165	525	0.242621	6	17;16;14;12;5;3	17	17	Prdx6	Putative uncharacterized protein	IPI00758024;IPI00555059;IPI00754071;IPI00404031	IPI00758024;IPI00555059;IPI00754071;IPI00404031;IPI00756385;IPI00221454	Q6A0D0;Q6GT24	>IPI:IPI00758024.1|TREMBL:Q6A0D0;Q6GT24|ENSEMBL:ENSMUSP00000071636|REFSEQ:NP_031479|VEGA:OTTMUSP00000017703 Tax_Id=10090 Gene_Symbol=Prdx6 Putative uncharacterized protein;>IPI:IPI00555059.2|SWISS-PROT:O08709|TREMBL:Q53ZU7 Tax_Id=10090 Gene_Symbol=Prdx6 Pe
0.552029	1.3053	0.913993	0.823927	0.649604	0.715359	0.508828	0.634759	0.595877	0.845309	0.18111	0.540745	1.60774	0.381621	0.667824	0.950751	0.66921	0.848752	1.07183	0.55537	0.49729	0.215128	0.663834	1.04934	526	0.472905	2	16;9	16	16	Ahnak	AHNAK nucleoprotein isoform 1	IPI00553798;IPI00605894	IPI00553798;IPI00605894	A0JLR7;A0PJF4;Q3UYW8;Q6UIL4;Q8BKS2;Q8BRB8	>IPI:IPI00553798.2|TREMBL:A0JLR7;A0PJF4;Q3UYW8;Q6UIL4;Q8BKS2;Q8BRB8;Q8CGE7;Q8VDN3|ENSEMBL:ENSMUSP00000090633|REFSEQ:NP_033773 Tax_Id=10090 Gene_Symbol=Ahnak AHNAK nucleoprotein isoform 1;>IPI:IPI00605894.1|TREMBL:Q61484;Q6UL10|ENSEMBL:ENSMUSP00000085366 Ta
5.50873	3.97472	3.61546	4.10644	4.00979	4.29867	4.11963	3.88289	4.363	4.14044	4.27917	4.19234	3.25373	3.48032	4.63049	3.93778	4.38231	4.45196	6.16903	4.48974	4.75987	3.80431	3.65484	4.35275	527	0.248365	2	22;8	36	15	Tubb3	Tubulin beta-3 chain	IPI00112251	IPI00112251;IPI00662501	Q9ERD7	>IPI:IPI00112251.1|SWISS-PROT:Q9ERD7|TREMBL:D5MR34;Q9CRT0|ENSEMBL:ENSMUSP00000071134|REFSEQ:NP_075768|VEGA:OTTMUSP00000034531 Tax_Id=10090 Gene_Symbol=Tubb3 Tubulin beta-3 chain
11.8668	8.12282	5.36654	9.62371	9.21744	3.85966	6.09459	4.00866	6.71276	4.17101	7.18907	6.73401	5.57786	6.43749	11.905	8.8574	7.77786	6.16941	6.68539	6.82361	4.26621	7.40466	8.40972	9.86096	528	0.423202	3	16;16;6	16	15	Cap1	Adenylyl cyclase-associated protein 1	IPI00137331;IPI00869430	IPI00137331;IPI00869430;IPI00649994	P40124	>IPI:IPI00137331.6|SWISS-PROT:P40124|TREMBL:Q3U0U5 Tax_Id=10090 Gene_Symbol=Cap1 Adenylyl cyclase-associated protein 1;>IPI:IPI00869430.1|TREMBL:Q3TC53;Q3UNQ0;Q3UVJ2;Q8BPT7|ENSEMBL:ENSMUSP00000068260;ENSMUSP00000101862;ENSMUSP00000101864|REFSEQ:NP_031624|V
6.20078	3.08957	2.20158	4.29258	3.24971	2.90554	3.01523	1.07267	2.92483	2.56647	4.60193	3.14288	2.42718	2.10455	2.14966	3.29598	3.15199	2.94881	5.27844	2.43712	3.13873	1.44373	2.49763	4.40354	529	0.522446	2	15;14	15	14	Apoa1	apolipoprotein A-I preproprotein	IPI00877236;IPI00121209	IPI00877236;IPI00121209	O08855;O09042;Q3V2G1;Q58EV2;Q8BPD5	>IPI:IPI00877236.1|TREMBL:O08855;O09042;Q3V2G1;Q58EV2;Q8BPD5|ENSEMBL:ENSMUSP00000034588|REFSEQ:NP_033822|VEGA:OTTMUSP00000036355 Tax_Id=10090 Gene_Symbol=Apoa1 apolipoprotein A-I preproprotein;>IPI:IPI00121209.1|SWISS-PROT:Q00623 Tax_Id=10090 Gene_Symbol=A
1.892	4.70433	4.11404	2.88634	3.04897	2.16039	1.32568	2.45326	2.16943	2.63185	0.950209	1.95511	3.87582	1.66931	3.03416	3.55897	2.80081	2.74168	5.72737	2.46463	1.39262	0.415939	2.74733	4.4401	530	0.360798	5	13;12;10;8;8	13	13	Anxa2	Annexin A2	IPI00468203;IPI00605518;IPI00885292;IPI00885455;IPI00885367	IPI00468203;IPI00605518;IPI00885292;IPI00885455;IPI00885367	P07356	>IPI:IPI00468203.3|SWISS-PROT:P07356|TREMBL:Q3UCD3;Q542G9;Q99KH3;Q9CZI7|ENSEMBL:ENSMUSP00000034756|REFSEQ:NP_031611|VEGA:OTTMUSP00000040269 Tax_Id=10090 Gene_Symbol=Anxa2 Annexin A2;>IPI:IPI00605518.1|REFSEQ:XP_001474833 Tax_Id=10090 Gene_Symbol=LOC1000488
1.38255	1.58195	1.46139	1.65508	1.64623	1.47759	1.72176	1.5075	1.76115	1.81094	1.5192	1.63822	1.60478	1.49047	1.66398	1.67884	1.5874	1.81884	1.43846	1.56536	1.54152	1.47469	1.48476	1.64474	531	0.470416	6	13;12;10;8;1;1	13	13	Pebp1	Phosphatidylethanolamine-binding protein 1	IPI00137730;IPI00858116;IPI00340165;IPI00856331	IPI00137730;IPI00858116;IPI00340165;IPI00856331;IPI00117893;IPI00409959	P70296	>IPI:IPI00137730.7|SWISS-PROT:P70296|TREMBL:Q3TGC5;Q5EBQ2|ENSEMBL:ENSMUSP00000048425|REFSEQ:NP_061346|VEGA:OTTMUSP00000031358 Tax_Id=10090 Gene_Symbol=Pebp1 Phosphatidylethanolamine-binding protein 1;>IPI:IPI00858116.1|TREMBL:D3Z1V4|ENSEMBL:ENSMUSP00000107
6.01215	4.3096	8.57412	4.17223	4.85578	4.09383	9.3985	2.8715	2.26526	5.82513	5.6744	3.14446	4.33426	9.93048	8.73058	6.2461	4.18708	5.2829	4.31611	5.75341	5.19588	6.42591	3.51815	6.32271	532	0.417725	3	13;1;1	13	13	Rph3a	Rabphilin-3A	IPI00111151	IPI00111151;IPI00136301;IPI00556846	P47708	>IPI:IPI00111151.2|SWISS-PROT:P47708|TREMBL:Q768S5|ENSEMBL:ENSMUSP00000078198|REFSEQ:NP_035416 Tax_Id=10090 Gene_Symbol=Rph3a Rabphilin-3A
0.157719	0.183618	0.161564	0.20245	0.12147	0.124909	0.126677	0.136906	0.156654	0.165052	0.10548	0.327161	0.196498	0.139173	0.119376	0.163543	0.136545	0.153339	0.159043	0.135759	0.110022	0.131977	0.130173	0.145919	533	0.236675	2	13;9	13	12	G3bp1	Ras GTPase-activating protein-binding protein 1	IPI00130095;IPI00654422	IPI00130095;IPI00654422	P97855	>IPI:IPI00130095.1|SWISS-PROT:P97855|TREMBL:Q571F9;Q5NCU1|ENSEMBL:ENSMUSP00000018727|REFSEQ:NP_038744|VEGA:OTTMUSP00000005871 Tax_Id=10090 Gene_Symbol=G3bp1 Ras GTPase-activating protein-binding protein 1;>IPI:IPI00654422.1|TREMBL:Q3UR88|ENSEMBL:ENSMUSP000
0.287786	0.546837	0.773575	0.510777	0.535619	0.475421	0.39496	0.659718	0.611284	0.530026	0.396338	0.435256	0.720617	0.422351	0.423191	0.604522	0.481557	0.522302	0.313019	0.393035	0.418866	0.270592	0.41587	0.475873	534	0.54823	13	11;11;3;3;3;3;3;3;3;3;3;3;2	11	11	Rrbp1	Isoform 3 of Ribosome-binding protein 1	IPI00121149;IPI00755120	IPI00121149;IPI00755120;IPI00230457;IPI00230458;IPI00230459;IPI00230461;IPI00230462;IPI00230463;IPI00230464;IPI00230465;IPI00226199;IPI00226200;IPI00226201	Q99PL5-1	>IPI:IPI00121149.1|SWISS-PROT:Q99PL5-1 Tax_Id=10090 Gene_Symbol=Rrbp1 Isoform 3 of Ribosome-binding protein 1;>IPI:IPI00755120.2|TREMBL:A2AVJ7;Q6ZPS0;Q8C7E8|ENSEMBL:ENSMUSP00000016072|REFSEQ:NP_077243|VEGA:OTTMUSP00000003190 Tax_Id=10090 Gene_Symbol=Rrbp1
0.225012	0.336836	0.388349	0.367377	0.28082	0.274816	0.230086	0.390046	0.280073	0.268089	0.244069	0.240108	0.285543	0.301087	0.342489	0.310116	0.315497	0.291358	0.318766	0.197219	0.227511	0.263484	0.355	0.240142	535	0.533834	2	10;3	10	10	Eif3h	Eukaryotic translation initiation factor 3 subunit H	IPI00128202	IPI00128202;IPI00457995	Q91WK2	>IPI:IPI00128202.1|SWISS-PROT:Q91WK2|TREMBL:Q3THW7;Q3TII2;Q3TIK5;Q5M9L0;Q8BTX5|ENSEMBL:ENSMUSP00000022925|REFSEQ:NP_542366 Tax_Id=10090 Gene_Symbol=Eif3h Eukaryotic translation initiation factor 3 subunit H
1.10523	1.50818	1.39214	1.82057	1.38219	1.43966	1.27992	1.63044	1.34904	1.49036	1.20909	1.35239	1.9505	1.51711	1.1784	1.39942	1.37781	1.58238	1.13827	1.54562	1.51238	1.27244	1.43856	1.60205	536	0.95851	2	20;18	20	0	Tpm3	29 kDa protein	IPI00881945;IPI00459570	IPI00881945;IPI00459570	D3YVR0;E9Q7Q3	>IPI:IPI00881945.1|ENSEMBL:ENSMUSP00000113056|VEGA:OTTMUSP00000038085 Tax_Id=10090 Gene_Symbol=Tpm3 29 kDa protein;>IPI:IPI00459570.1|TREMBL:Q8C7C3 Tax_Id=10090 Gene_Symbol=Tpm3 Putative uncharacterized protein
0.522657	1.11692	1.05312	1.13439	0.880204	0.757518	0.800384	1.01754	0.6832	0.98561	0.770238	0.842602	1.49036	0.912409	0.74366	1.08018	0.965344	1.15014	0.765228	0.772022	0.721397	0.660677	0.909504	1	537	0.75155	1	14	14	14	Psme1	Proteasome activator complex subunit 1	IPI00124223	IPI00124223	P97371	>IPI:IPI00124223.3|SWISS-PROT:P97371|TREMBL:Q5HZK3|ENSEMBL:ENSMUSP00000087046|REFSEQ:NP_035319 Tax_Id=10090 Gene_Symbol=Psme1 Proteasome activator complex subunit 1
0.592698	0.834376	0.92584	1.04041	0.682361	0.771248	0.682408	0.990001	0.679532	0.82203	0.689275	0.622007	1.15717	0.84317	0.757518	0.979048	0.81314	0.822301	0.397804	0.77101	0.624805	0.517411	0.623558	0.683714	538	0.129947	1	8	8	8	Nomo1	Nodal modulator 1	IPI00222429	IPI00222429	Q6GQT9	>IPI:IPI00222429.6|SWISS-PROT:Q6GQT9|ENSEMBL:ENSMUSP00000033121|REFSEQ:NP_694697 Tax_Id=10090 Gene_Symbol=Nomo1 Nodal modulator 1
0.179118	0.280308	0.308728	0.314248	0.228243	0.248349	0.228655	0.263957	0.200417	0.256102	0.17995	0.250614	0.358873	0.264585	0.20809	0.266382	0.288634	0.256404	0.166301	0.276312	0.240952	0.160769	0.251585	0.255826	539	0.678187	1	8	8	8	Aimp1	aminoacyl tRNA synthetase complex-interacting multifunctional protein 1	IPI00132194	IPI00132194	P31230	>IPI:IPI00132194.3|SWISS-PROT:P31230|TREMBL:Q3TUZ1;Q3UZG4;Q8C2U7|ENSEMBL:ENSMUSP00000029663|REFSEQ:NP_031952 Tax_Id=10090 Gene_Symbol=Aimp1 aminoacyl tRNA synthetase complex-interacting multifunctional protein 1
1.09761	0.894454	1.54254	1.75454	1.50607	1.69673	1.40199	1.52172	1.47165	1.56387	1.67788	1.51605	1.30249	1.8458	1.50243	1.52581	1.68127	2.09833	1.25527	1.68574	1.70593	1.34874	1.76929	1.27413	540	0.494068	1	7	7	7	Ykt6	Synaptobrevin homolog YKT6	IPI00453771	IPI00453771	Q9CQW1	>IPI:IPI00453771.2|SWISS-PROT:Q9CQW1|ENSEMBL:ENSMUSP00000002818|REFSEQ:NP_062635|VEGA:OTTMUSP00000005317 Tax_Id=10090 Gene_Symbol=Ykt6 Synaptobrevin homolog YKT6
0.668852	0.814929	0.878426	0.777665	0.651848	0.632831	0.545911	0.705517	0.678426	0.762428	0.732708	0.605217	0.73346	0.819068	0.791077	1.00097	0.753125	0.754318	0.819403	0.692857	0.754318	0.393546	0.727061	0.694637	541	0.102295	1	5	5	5	Nans	Putative uncharacterized protein	IPI00114925	IPI00114925	Q3TFB5;Q99J77;Q9JJH0	>IPI:IPI00114925.1|TREMBL:Q3TFB5;Q99J77;Q9JJH0|ENSEMBL:ENSMUSP00000030018|REFSEQ:NP_444409|VEGA:OTTMUSP00000007313 Tax_Id=10090 Gene_Symbol=Nans Putative uncharacterized protein
3.13726	3.22456	3.0087	4.12473	3.83274	3.6865	3.68229	3.61939	3.52299	4.25894	3.72356	3.52684	3.26926	4.73306	4.0122	4.59559	5.03449	3.68446	2.44182	4.04875	3.75629	3.51309	3.92804	3.86608	542	0.645867	1	5	5	5	Isoc1	Isochorismatase domain-containing protein 1	IPI00165849	IPI00165849	Q91V64	>IPI:IPI00165849.3|SWISS-PROT:Q91V64|TREMBL:Q9D096|ENSEMBL:ENSMUSP00000025503|REFSEQ:NP_079754 Tax_Id=10090 Gene_Symbol=Isoc1 Isochorismatase domain-containing protein 1
0.309454	0.546986	0.571233	0.644413	0.422244	0.425044	0.436453	0.646914	0.435939	0.547945	0.369563	0.473104	0.825423	0.471342	0.443321	0.587993	0.536826	0.638855	0.318056	0.488186	0.386877	0.354572	0.504007	0.535332	543	0.777546	1	15	15	5	Pdia6	Putative uncharacterized protein	IPI00222496	IPI00222496	Q922R8	>IPI:IPI00222496.3|SWISS-PROT:Q922R8|TREMBL:Q3THH1;Q3TJL8;Q3TML0;Q9DAB4|ENSEMBL:ENSMUSP00000052912|REFSEQ:NP_082235|VEGA:OTTMUSP00000028252 Tax_Id=10090 Gene_Symbol=Pdia6 Putative uncharacterized protein
3.29218	2.69833	2.47066	3.04247	2.88309	2.8131	2.86747	2.72102	3.04962	3.00228	2.81627	3.01695	2.53017	2.57745	2.88467	2.83776	3.03196	3.18532	3.47947	3.17632	2.8753	2.4706	2.71813	3.21192	544	0.0886005	1	45	45	4	Pkm; Pk3; Pkm2; Pykm	Isoform M1 of Pyruvate kinase isozymes M1/M2	IPI00845840	IPI00845840	P52480-2	>IPI:IPI00845840.1|SWISS-PROT:P52480-2 Tax_Id=10090 Gene_Symbol=Pkm2 Isoform M1 of Pyruvate kinase isozymes M1/M2
0.29209	0.428339	0.368148	0.3336	0.394758	0.30567	0.28456	0.259457	0.304062	0.2502	0.274168	0.239412	0.552273	0.260851	0.36165	0.452304	0.253338	0.351865	0.857265	0.344447	0.158856	0.140337	0.27115	0.323311	545	0.0732687	1	3	3	3	Lgmn	Legumain	IPI00130627	IPI00130627	O89017	>IPI:IPI00130627.1|SWISS-PROT:O89017|TREMBL:A2RTI3;Q3UE99|ENSEMBL:ENSMUSP00000021607;ENSMUSP00000105647|REFSEQ:NP_035305|VEGA:OTTMUSP00000027121;OTTMUSP00000027122 Tax_Id=10090 Gene_Symbol=Lgmn Legumain
0.511561	0.620424	0.586167	0.644828	0.495344	0.470655	0.405548	0.548968	0.434821	0.523725	0.374798	0.439271	0.648256	0.46581	0.507537	0.508053	0.55417	0.616827	0.541624	0.486997	0.448813	0.342126	0.472054	0.578436	546	0.059947	1	36	36	1	Anxa6	Annexin A6	IPI00554894	IPI00554894	P14824	>IPI:IPI00554894.2|SWISS-PROT:P14824 Tax_Id=10090 Gene_Symbol=Anxa6 Annexin A6
1.00728	1.21278	1.19316	1.45753	1.16723	1.20291	1.05745	1.25554	1.13107	1.28203	1.02159	0.994827	1.44559	1.26994	1.26231	1.27489	1.1804	1.36437	1.10819	1.17143	1.15393	0.935541	1.15441	1.18384	547	0.219454	1	47	47	1	Vcp	Transitional endoplasmic reticulum ATPase	IPI00622235	IPI00622235	Q01853	>IPI:IPI00622235.5|SWISS-PROT:Q01853|TREMBL:Q8BNF8|ENSEMBL:ENSMUSP00000030164|REFSEQ:NP_033529|VEGA:OTTMUSP00000007079 Tax_Id=10090 Gene_Symbol=Vcp Transitional endoplasmic reticulum ATPase
5.13479	3.80909	2.4185	1.71942	2.17552	2.54849	2.39642	3.53932	1.31392	NaN	NaN	NaN	2.22138	15.5219	5.00852	5.96339	4.01477	4.01075	2.73164	1.8457	3.13146	6.85589	9.95223	12.0863	548	0.0622299	6	7;5;5;5;1;1	7	7	Tceal5	Transcription elongation factor A protein-like 5	IPI00228674;IPI00480568;IPI00757153;IPI00471295	IPI00228674;IPI00480568;IPI00757153;IPI00471295;IPI00831171;IPI00831251	Q8CCT4	>IPI:IPI00228674.3|SWISS-PROT:Q8CCT4|TREMBL:Q14C38|ENSEMBL:ENSMUSP00000065397|REFSEQ:NP_808587|VEGA:OTTMUSP00000020299 Tax_Id=10090 Gene_Symbol=Tceal5 Transcription elongation factor A protein-like 5;>IPI:IPI00480568.2|TREMBL:Q9DB24|ENSEMBL:ENSMUSP00000033
2.42607	1.6613	3.15547	4.59834	NaN	3.65123	NaN	NaN	NaN	2.82231	3.64193	NaN	2.55709	1.91622	1.60524	8.3257	4.70433	7.41125	NaN	4.09299	NaN	NaN	NaN	NaN	549	0.417103	3	4;4;3	4	4	Wbp2	Putative uncharacterized protein	IPI00749735;IPI00129045;IPI00648905	IPI00749735;IPI00129045;IPI00648905	Q9DBP6	>IPI:IPI00749735.1|TREMBL:Q9DBP6|ENSEMBL:ENSMUSP00000102054 Tax_Id=10090 Gene_Symbol=Wbp2 Putative uncharacterized protein;>IPI:IPI00129045.1|SWISS-PROT:P97765|TREMBL:Q3TRG5;Q544A1|ENSEMBL:ENSMUSP00000074204|REFSEQ:NP_058548|VEGA:OTTMUSP00000003889 Tax_Id=
14.7267	0.066507	NaN	1.18336	NaN	NaN	NaN	4.31891	8.65576	7.97957	3.70412	19.4386	5.24521	13.6668	13.6896	9.58038	7.50807	6.99105	2.88052	NaN	NaN	22.1175	12.4448	NaN	550	0.162878	4	9;9;9;1	9	9	Cdh2	Cadherin-2	IPI00323134;IPI00749860;IPI00830707	IPI00323134;IPI00749860;IPI00830707;IPI00131397	P15116	>IPI:IPI00323134.1|SWISS-PROT:P15116|TREMBL:Q3UIC2;Q8BSI9|ENSEMBL:ENSMUSP00000111518 Tax_Id=10090 Gene_Symbol=Cdh2 Cadherin-2;>IPI:IPI00749860.1|TREMBL:Q6GU11|ENSEMBL:ENSMUSP00000025166|REFSEQ:NP_031690;XP_001472044|VEGA:OTTMUSP00000017505 Tax_Id=10090 Gen
4.55353	3.71402	6.77231	1.79585	NaN	8.87076	9.07194	8.71991	6.2135	8.65726	6.47459	6.26096	1.70812	10.272	8.20008	9.66183	NaN	0.732279	3.61272	6.17437	8.44238	5.21975	8.34585	7.66695	551	0.136971	2	10;5	10	9	Ppp1r9b	Isoform 1 of Neurabin-2	IPI00420651;IPI00649394	IPI00420651;IPI00649394	Q6R891-1	>IPI:IPI00420651.3|SWISS-PROT:Q6R891-1|ENSEMBL:ENSMUSP00000041732|REFSEQ:NP_758465|VEGA:OTTMUSP00000001457 Tax_Id=10090 Gene_Symbol=Ppp1r9b Isoform 1 of Neurabin-2;>IPI:IPI00649394.1|SWISS-PROT:Q6R891-2|TREMBL:Q8C3W4|ENSEMBL:ENSMUSP00000103377|VEGA:OTTMUSP
0.69808	2.46117	1.65396	1.7041	1.26443	1.35172	1.27415	1.90103	2.61684	2.5208	2.16995	1.86944	1.91718	1.07351	0.748447	0.65937	2.38197	1.08865	1.49009	1.27233	1.4721	1.10727	1.85684	0.961261	552	0.103691	2	8;7	8	8	Gprin1	G protein-regulated inducer of neurite outgrowth 1	IPI00138232;IPI00753717	IPI00138232;IPI00753717	Q3UNH4	>IPI:IPI00138232.4|SWISS-PROT:Q3UNH4|ENSEMBL:ENSMUSP00000097106;ENSMUSP00000115539|REFSEQ:NP_036144|VEGA:OTTMUSP00000043436;OTTMUSP00000043437 Tax_Id=10090 Gene_Symbol=Gprin1 G protein-regulated inducer of neurite outgrowth 1;>IPI:IPI00753717.1|REFSEQ:XP_0
3.45973	1.40513	NaN	NaN	NaN	4.11692	2.65266	0.757117	3.7723	NaN	3.31543	3.61873	2.04729	3.69113	4.68494	4.45732	NaN	1.43536	NaN	NaN	1.97324	4.73373	NaN	8.00128	553	0.51058	2	7;6	7	7	Exog	Nuclease EXOG, mitochondrial	IPI00224069;IPI00955735	IPI00224069;IPI00955735	Q8C163	>IPI:IPI00224069.3|SWISS-PROT:Q8C163|ENSEMBL:ENSMUSP00000035094|REFSEQ:NP_766044 Tax_Id=10090 Gene_Symbol=Exog Nuclease EXOG, mitochondrial;>IPI:IPI00955735.1|REFSEQ:NP_001165607 Tax_Id=10090 Gene_Symbol=Exog nuclease EXOG, mitochondrial isoform 1 precurso
11.5294	4.8466	3.64272	3.99808	13.9173	9.58038	5.01102	4.1215	7.52049	4.67771	4.38751	8.31324	3.26052	1.6506	12.9809	6.06538	8.61178	4.46828	14.4917	6.75676	2.49364	14.6664	13.8689	21.4717	554	0.583136	6	7;5;5;2;1;1	7	7	Auh	Isoform 1 of Methylglutaconyl-CoA hydratase, mitochondrial	IPI00124900;IPI00880589;IPI00880712	IPI00124900;IPI00880589;IPI00880712;IPI00357511;IPI00357510;IPI00880341	Q9JLZ3-1	>IPI:IPI00124900.1|SWISS-PROT:Q9JLZ3-1|ENSEMBL:ENSMUSP00000021913|REFSEQ:NP_057918|VEGA:OTTMUSP00000032438 Tax_Id=10090 Gene_Symbol=Auh Isoform 1 of Methylglutaconyl-CoA hydratase, mitochondrial;>IPI:IPI00880589.1|ENSEMBL:ENSMUSP00000121852|VEGA:OTTMUSP000
4.21159	3.32967	3.19489	3.32403	6.21234	8.93655	6.51848	NaN	3.50447	4.39696	4.39097	6.09496	2.20663	4.60872	2.76671	2.45531	2.87076	3.59803	11.061	1.16531	5.12112	8.05802	3.23384	1.77069	555	0.319485	6	9;9;8;4;3;3	9	5	Ntm	Neurotrimin	IPI00417005;IPI00857329;IPI00402778	IPI00417005;IPI00857329;IPI00402778;IPI00625536;IPI00857449;IPI00858152	Q99PJ0	>IPI:IPI00417005.1|SWISS-PROT:Q99PJ0|TREMBL:Q3TYC2|ENSEMBL:ENSMUSP00000110892|VEGA:OTTMUSP00000026865 Tax_Id=10090 Gene_Symbol=Ntm Neurotrimin;>IPI:IPI00857329.1|TREMBL:D3Z396|ENSEMBL:ENSMUSP00000110891|VEGA:OTTMUSP00000026868 Tax_Id=10090 Gene_Symbol=Ntm
NaN	NaN	9.3791	NaN	NaN	2.98027	1.62441	1.27662	3.39674	NaN	1.97636	4.91473	3.32967	7.45267	2.26665	6.67735	2.78971	3.19203	NaN	2.86426	1.96634	3.13844	3.17611	NaN	556	0.174105	7	4;3;3;3;3;1;1	4	4	Osbpl1a	Isoform 1 of Oxysterol-binding protein-related protein 1	IPI00469318;IPI00885663;IPI00625286;IPI00742367;IPI00886212	IPI00469318;IPI00885663;IPI00625286;IPI00742367;IPI00886212;IPI00404881;IPI00886153	Q91XL9-1	>IPI:IPI00469318.1|SWISS-PROT:Q91XL9-1|ENSEMBL:ENSMUSP00000073957|REFSEQ:NP_997413|VEGA:OTTMUSP00000038978 Tax_Id=10090 Gene_Symbol=Osbpl1a Isoform 1 of Oxysterol-binding protein-related protein 1;>IPI:IPI00885663.1|TREMBL:Q3UZK3;Q3V156|ENSEMBL:ENSMUSP0000
NaN	2.73052	3.71333	2.61213	6.65602	3.16486	4.12848	5.17759	2.21774	2.68298	2.45628	2.79439	1.52704	1.41567	5.44247	5.32453	7.77182	1.92315	3.60789	5.34673	5.12978	6.66711	7.52162	6.21929	557	0.0694032	12	31;31;29;29;29;20;12;12;3;3;3;2	31	3	Macf1	Isoform 2 of Microtubule-actin cross-linking factor 1	IPI00889213;IPI00848566;IPI00884482;IPI00229613;IPI00890208;IPI00851023	IPI00889213;IPI00848566;IPI00884482;IPI00229613;IPI00890208;IPI00851023;IPI00889893;IPI00849006;IPI00669305;IPI00649261;IPI00649565;IPI00851025	Q9QXZ0-1	>IPI:IPI00889213.1|SWISS-PROT:Q9QXZ0-1|TREMBL:B1ARU3;Q5DTZ2|ENSEMBL:ENSMUSP00000080755;ENSMUSP00000101827|VEGA:OTTMUSP00000009341 Tax_Id=10090 Gene_Symbol=Macf1 Isoform 2 of Microtubule-actin cross-linking factor 1;>IPI:IPI00848566.1|TREMBL:B1ART6;B1ARV9;Q
6.63878	5.13928	4.89141	3.27022	4.59031	12.6976	15.177	6.30835	5.96125	1.99378	NaN	NaN	1.80177	5.89449	3.96291	2.17708	2.8339	6.55093	17.2467	4.54959	2.87076	5.35389	13.2275	8.87942	558	0.232612	3	14;10;2	14	10	Pip4k2a	Phosphatidylinositol-5-phosphate 4-kinase type-2 alpha	IPI00115708;IPI00756129	IPI00115708;IPI00756129;IPI00755514	O70172	>IPI:IPI00115708.1|SWISS-PROT:O70172|TREMBL:Q544E3;Q9CZS7|ENSEMBL:ENSMUSP00000006912|REFSEQ:NP_032871|VEGA:OTTMUSP00000012251 Tax_Id=10090 Gene_Symbol=Pip4k2a Phosphatidylinositol-5-phosphate 4-kinase type-2 alpha;>IPI:IPI00756129.2|TREMBL:A2ASS0|ENSEMBL:E
8.41467	3.114	5.49692	1.69532	6.58154	4.40277	6.84369	3.18613	5.24796	8.96218	5.48035	9.09009	2.04821	0.140572	4.74113	4.21567	3.6295	6.04193	4.32938	2.11577	6.30596	8.43953	NaN	6.32591	559	0.153936	4	3;3;3;1	13	1	Camk2g	Isoform 1 of Calcium/calmodulin-dependent protein kinase type II subunit gamma	IPI00124695;IPI00228044;IPI00228045	IPI00124695;IPI00228044;IPI00228045;IPI00405384	Q923T9-1	>IPI:IPI00124695.1|SWISS-PROT:Q923T9-1|ENSEMBL:ENSMUSP00000071720|REFSEQ:NP_848712 Tax_Id=10090 Gene_Symbol=Camk2g Isoform 1 of Calcium/calmodulin-dependent protein kinase type II subunit gamma;>IPI:IPI00228044.1|SWISS-PROT:Q923T9-2|ENSEMBL:ENSMUSP00000079
6.88753	17.1206	2.72769	17.67	37.4126	14.9633	5.30729	9.87167	1.9163	3.76492	42.4484	6.29842	1.97906	4.81487	2.63804	6.56642	8.94774	23.1235	9.40291	4.15386	18.7988	6.88137	4.40995	37.7658	560	0.400304	1	5	5	5	Gng2	Guanine nucleotide-binding protein G(I)/G(S)/G(O) subunit gamma-2	IPI00230194	IPI00230194	P63213	>IPI:IPI00230194.5|SWISS-PROT:P63213|ENSEMBL:ENSMUSP00000055256|REFSEQ:NP_001033726;NP_034445 Tax_Id=10090 Gene_Symbol=Gng2 Guanine nucleotide-binding protein G(I)/G(S)/G(O) subunit gamma-2
2.13949	2.51357	2.74386	2.6481	3.46897	3.33634	2.74446	2.33825	2.86944	3.03076	2.16067	2.97194	1.66736	0.884408	2.70592	0.960246	2.49514	1.0441	1.86766	2.11309	0.413155	1.82822	2.3024	1.79524	561	0.0607145	1	3	3	3	Timm10; Tim10		IPI00165902	IPI00165902	P62073	>IPI:IPI00165902.1|SWISS-PROT:P62073|TREMBL:A2ATS2|ENSEMBL:ENSMUSP00000028470;ENSMUSP00000107258|REFSEQ:NP_038927|VEGA:OTTMUSP00000014697;OTTMUSP00000014698 Tax_Id=10090 Gene_Symbol=Timm13;Timm10 Mitochondrial import inner membrane translocase subunit Tim1
7.9164	6.07903	3.56621	1.44865	9.41886	4.004	2.18986	NaN	6.90084	NaN	8.99604	6.6836	3.59932	2.29268	5.17331	3.53732	2.78784	2.48713	22.411	2.36821	11.9356	NaN	NaN	8.3654	562	0.48915	1	7	7	2	Ahnak2	similar to KIAA2019 protein	IPI00850843	IPI00850843	Q3UUE0	>IPI:IPI00850843.2|TREMBL:Q3UUE0|ENSEMBL:ENSMUSP00000098571;ENSMUSP00000114522|REFSEQ:XP_001475996|VEGA:OTTMUSP00000043398 Tax_Id=10090 Gene_Symbol=Ahnak2 similar to KIAA2019 protein
4.92102	6.04157	9.13743	5.3268	5.26704	7.49962	5.35418	NaN	NaN	NaN	NaN	2.15829	3.12412	4.65289	8.84721	11.0673	6.82547	15.2321	6.78795	NaN	NaN	NaN	NaN	NaN	563	0.603714	1	6	6	6	Grlf1;Arhgap35;Kiaa1722	Glucocorticoid receptor DNA-binding factor 1	IPI00480321	IPI00480321	Q91YM2	>IPI:IPI00480321.2|SWISS-PROT:Q91YM2|TREMBL:B2RTN5;Q3TSU7;Q3UVZ8;Q5U612|ENSEMBL:ENSMUSP00000075242|REFSEQ:NP_766327 Tax_Id=10090 Gene_Symbol=Grlf1 Glucocorticoid receptor DNA-binding factor 1
0.590877	0.825014	1.00192	1.13402	0.815794	0.832016	0.745935	1.06166	0.762021	0.950119	0.797957	0.650703	1.36027	0.847817	0.74228	0.954381	0.945805	0.983961	0.885897	0.820345	0.789391	0.662998	0.880902	0.769349	564	0.606596	6	9;9;8;8;1;1	9	9	Ilf3	Isoform 3 of Interleukin enhancer-binding factor 3	IPI00130591;IPI00555078;IPI00403996;IPI00776384	IPI00130591;IPI00555078;IPI00403996;IPI00776384;IPI00128254;IPI00475177	Q9Z1X4-3	>IPI:IPI00130591.2|SWISS-PROT:Q9Z1X4-3|REFSEQ:NP_034691 Tax_Id=10090 Gene_Symbol=Ilf3 Isoform 3 of Interleukin enhancer-binding factor 3;>IPI:IPI00555078.1|SWISS-PROT:Q9Z1X4-1|ENSEMBL:ENSMUSP00000065770|REFSEQ:NP_001036172 Tax_Id=10090 Gene_Symbol=Ilf3 Iso
1.98673	1.77054	1.82932	2.90191	1.83655	2.32169	2.63421	1.93618	2.28995	1.91201	2.26814	1.86487	1.99259	1.44745	2.43208	1.65804	2.13584	2.1368	2.13047	2.48281	2.36978	1.58917	1.97433	2.3068	565	0.755835	3	9;9;5	9	9	Bdh1	D-beta-hydroxybutyrate dehydrogenase, mitochondrial	IPI00330754;IPI00890322;IPI00857778	IPI00330754;IPI00890322;IPI00857778	Q80XN0	>IPI:IPI00330754.1|SWISS-PROT:Q80XN0 Tax_Id=10090 Gene_Symbol=Bdh1 D-beta-hydroxybutyrate dehydrogenase, mitochondrial;>IPI:IPI00890322.1|TREMBL:A1E283;Q3UL45|ENSEMBL:ENSMUSP00000087192;ENSMUSP00000110881;ENSMUSP00000110882|REFSEQ:NP_001116155;NP_780386|VE
NaN	NaN	4.44504	NaN	5.7867	12.4716	NaN	1.93671	3.68596	6.84885	NaN	4.86239	3.92095	6.17894	6.39223	2.81333	6.53851	3.93097	4.93925	NaN	11.5823	NaN	NaN	NaN	566	0.989482	2	9;9	9	9	Maob	Amine oxidase [flavin-containing] B	IPI00226140;IPI00944790	IPI00226140;IPI00944790	Q8BW75	>IPI:IPI00226140.5|SWISS-PROT:Q8BW75 Tax_Id=10090 Gene_Symbol=Maob Amine oxidase [flavin-containing] B;>IPI:IPI00944790.1|TREMBL:Q14CG9|ENSEMBL:ENSMUSP00000040550|REFSEQ:NP_766366|VEGA:OTTMUSP00000018395 Tax_Id=10090 Gene_Symbol=Maob amine oxidase [flavin-
4.21603	4.05022	4.12984	2.82024	4.865	6.28101	4.36281	3.79147	5.56731	4.6718	4.30979	3.51915	4.13942	4.65723	4.82021	5.44989	5.50176	7.21918	3.48955	3.99106	3.89803	4.22458	6.23675	4.26257	567	0.596013	4	9;9;1;1	9	8	Ppp2r5e	Serine/threonine-protein phosphatase 2A 56 kDa regulatory subunit epsilon isoform	IPI00224697;IPI00654180	IPI00224697;IPI00654180;IPI00356872;REV__IPI00918362	Q61151	>IPI:IPI00224697.1|SWISS-PROT:Q61151|ENSEMBL:ENSMUSP00000021447|REFSEQ:NP_036154 Tax_Id=10090 Gene_Symbol=Ppp2r5e Serine/threonine-protein phosphatase 2A 56 kDa regulatory subunit epsilon isoform;>IPI:IPI00654180.1|TREMBL:A0PJ98;Q3UZJ4|ENSEMBL:ENSMUSP00000
1.09982	1.59775	2.54641	2.19082	1.48894	1.57342	1.70646	1.87769	1.1197	1.42637	NaN	1.34313	2.70117	1.55492	1.59177	1.93188	2.07766	1.87638	0.959233	1.6114	1.34802	1.69932	1.55173	1.44005	568	0.441042	2	8;8	8	8	Eea1	Early endosome antigen 1	IPI00453776;IPI00808494	IPI00453776;IPI00808494	Q8BL66	>IPI:IPI00453776.1|SWISS-PROT:Q8BL66|TREMBL:Q3TQY5|ENSEMBL:ENSMUSP00000061493|REFSEQ:NP_001001932 Tax_Id=10090 Gene_Symbol=Eea1 Early endosome antigen 1;>IPI:IPI00808494.1|TREMBL:Q05CS7|ENSEMBL:ENSMUSP00000100925 Tax_Id=10090 Gene_Symbol=Eea1 Eea1 protein
0.566508	1.19367	1.20624	1.41461	1.11891	1.08202	1.07334	1.47562	0.781494	1.18827	1.079	0.913492	2.2779	1.03521	0.982415	1.45277	1.07123	1.99374	0.603246	0.792142	1.09167	0.963298	1.20431	1.4529	569	0.740572	2	8;8	8	8	Chgb	Secretogranin-1	IPI00130307;IPI00652806	IPI00130307;IPI00652806	P16014	>IPI:IPI00130307.1|SWISS-PROT:P16014|TREMBL:Q3TY66;Q3UZP2;Q8BP91;Q9CTW1|ENSEMBL:ENSMUSP00000028826|REFSEQ:NP_031720|VEGA:OTTMUSP00000016675 Tax_Id=10090 Gene_Symbol=Chgb Secretogranin-1;>IPI:IPI00652806.1|TREMBL:Q3UZU8 Tax_Id=10090 Gene_Symbol=Chgb Putativ
1.17171	1.86244	1.71101	2.01345	1.34432	1.39098	1.36616	1.37582	1.25868	1.35323	1.34255	1.22133	1.43299	1.42786	1.76404	1.79704	1.46703	1.58672	1.15879	1.51711	1.65303	1.38009	1.52548	1.47979	570	0.11443	2	10;9	10	8	Ubqln1	Isoform 2 of Ubiquilin-1	IPI00280207;IPI00153642	IPI00280207;IPI00153642	Q8R317-2	>IPI:IPI00280207.1|SWISS-PROT:Q8R317-2|TREMBL:Q3T992;Q3TN93;Q3V2J6|ENSEMBL:ENSMUSP00000075782|REFSEQ:NP_689420 Tax_Id=10090 Gene_Symbol=Ubqln1 Isoform 2 of Ubiquilin-1;>IPI:IPI00153642.1|SWISS-PROT:Q8R317-1|TREMBL:Q66K07|ENSEMBL:ENSMUSP00000050191|REFSEQ:N
2.23889	3.07702	3.15577	4.04858	3.23803	3.45495	3.99792	3.92465	2.73486	3.58333	3.30425	3.24423	2.60831	2.28618	2.97424	3.6122	2.88992	4.25532	1.92749	2.85714	3.82263	3.64126	3.65537	2.86516	571	0.431637	4	8;3;2;2	23	8	Atp2b1	plasma membrane calcium ATPase 1	IPI00556827	IPI00556827;IPI00875219;IPI00664111;IPI00850204	Q3TSK3;Q6PG79;Q8K314	>IPI:IPI00556827.1|TREMBL:Q3TSK3;Q6PG79;Q8K314|ENSEMBL:ENSMUSP00000020107|REFSEQ:NP_080758 Tax_Id=10090 Gene_Symbol=Atp2b1 plasma membrane calcium ATPase 1
4.52632	6.43625	6.9512	8.61252	5.70418	3.7125	5.34217	4.67508	4.9687	1.84901	6.23247	5.56359	7.59359	7.01115	6.0584	6.96136	7.90264	3.83524	2.4072	8.25832	6.48382	5.74713	6.26174	5.94601	572	0.376486	4	8;8;8;7	8	7	Stxbp5	Putative uncharacterized protein Stxbp5	IPI00875100;IPI00656317;IPI00918655;IPI00674768	IPI00875100;IPI00656317;IPI00918655;IPI00674768	D3Z6W8	>IPI:IPI00875100.1|TREMBL:D3Z6W8|ENSEMBL:ENSMUSP00000101195 Tax_Id=10090 Gene_Symbol=Stxbp5 Putative uncharacterized protein Stxbp5;>IPI:IPI00656317.2|SWISS-PROT:Q8K400-2|TREMBL:D3Z079|ENSEMBL:ENSMUSP00000123253|REFSEQ:NP_001074813|VEGA:OTTMUSP00000045052
0.661419	1.04294	1.14916	1.44396	0.813935	0.945269	1.00023	1.01449	0.875503	0.936768	1.15837	0.78284	1.32802	0.669523	0.888968	0.922084	1.1795	1.06329	1.01886	1.02114	1.0826	0.948407	0.941886	0.696233	573	0.825418	3	7;7;7	7	7	Usp7	Isoform 2 of Ubiquitin carboxyl-terminal hydrolase 7	IPI00463367;IPI00817018;IPI00816922	IPI00463367;IPI00817018;IPI00816922	Q6A4J8-2	>IPI:IPI00463367.2|SWISS-PROT:Q6A4J8-2|ENSEMBL:ENSMUSP00000087880 Tax_Id=10090 Gene_Symbol=Usp7 Isoform 2 of Ubiquitin carboxyl-terminal hydrolase 7;>IPI:IPI00817018.2|SWISS-PROT:Q6A4J8-1|TREMBL:Q3THF6|ENSEMBL:ENSMUSP00000111502|REFSEQ:NP_001003918 Tax_Id=
6.43459	6.54279	4.8821	5.56545	5.03145	5.58722	6.09162	5.38996	5.7867	5.28765	5.9004	7.88519	5.43508	5.81362	6.22007	6.43376	7.05318	7.34322	5.42211	6.42384	5.44692	4.9848	5.48637	6.2422	574	0.37418	3	7;7;6	7	7	App	Isoform APP770 of Amyloid beta A4 protein (Fragment)	IPI00114389;IPI00323079;IPI00230494	IPI00114389;IPI00323079;IPI00230494	P12023-1	>IPI:IPI00114389.4|SWISS-PROT:P12023-1|TREMBL:Q3TVS1;Q3TWF3;Q3TXI9;Q53ZT3|ENSEMBL:ENSMUSP00000073883 Tax_Id=10090 Gene_Symbol=App Isoform APP770 of Amyloid beta A4 protein (Fragment);>IPI:IPI00323079.1|SWISS-PROT:P12023-2|TREMBL:Q6GR78;Q8BPC7;Q8BPV5;Q99NY7
0.304016	0.389529	0.414113	0.539113	0.298107	0.292389	0.24312	0.34559	0.264739	0.30472	0.289461	0.211551	0.429793	0.382161	0.364844	0.237366	0.312442	0.362542	0.315527	0.390625	0.362266	0.288692	0.340252	0.330098	575	0.0565476	4	7;6;3;1	7	7	Ciapin1	Anamorsin	IPI00187301;IPI00881250	IPI00187301;IPI00881250;IPI00881118;IPI00880625	Q8WTY4	>IPI:IPI00187301.1|SWISS-PROT:Q8WTY4|ENSEMBL:ENSMUSP00000034233|REFSEQ:NP_598902|VEGA:OTTMUSP00000034085 Tax_Id=10090 Gene_Symbol=Ciapin1 Anamorsin;>IPI:IPI00881250.1|VEGA:OTTMUSP00000034731 Tax_Id=10090 Gene_Symbol=Ciapin1 20 kDa protein
0.141906	0.215244	0.246457	0.314921	0.198377	0.154133	0.155475	0.273291	0.186654	0.216305	0.144088	0.201159	0.445176	0.210469	0.148063	0.174997	0.204495	0.261138	0.223934	0.143002	0.154816	0.158844	0.18499	0.189933	576	0.787127	2	7;5	7	7	Aimp2	Aminoacyl tRNA synthase complex-interacting multifunctional protein 2	IPI00153103;IPI00858183	IPI00153103;IPI00858183	Q8R010	>IPI:IPI00153103.3|SWISS-PROT:Q8R010|ENSEMBL:ENSMUSP00000031613|REFSEQ:NP_001165617|VEGA:OTTMUSP00000030995 Tax_Id=10090 Gene_Symbol=Aimp2 Aminoacyl tRNA synthase complex-interacting multifunctional protein 2;>IPI:IPI00858183.1|TREMBL:Q8R3V2|ENSEMBL:ENSMUS
NaN	NaN	4.4195	10.2484	NaN	3.9593	4.78515	NaN	NaN	NaN	NaN	2.7835	7.373	6.11471	4.81093	5.1725	3.8323	NaN	4.24034	2.65463	4.91425	3.54975	3.84749	NaN	577	0.107225	3	7;1;1	7	7	Wasf1	Wiskott-Aldrich syndrome protein family member 1	IPI00471372	IPI00471372;IPI00221723;IPI00649351	Q8R5H6	>IPI:IPI00471372.2|SWISS-PROT:Q8R5H6|ENSEMBL:ENSMUSP00000019975;ENSMUSP00000101148|REFSEQ:NP_114083|VEGA:OTTMUSP00000022835;OTTMUSP00000022841 Tax_Id=10090 Gene_Symbol=Wasf1 Wiskott-Aldrich syndrome protein family member 1
0.735456	1.16899	1.10026	1.37165	0.869943	0.987557	0.854409	1.31505	0.949397	1.02196	0.78883	0.833472	1.31667	1.08205	1.02092	1.22954	1.20233	1.22105	0.60931	1.11819	1.01691	0.805932	1.03753	1.02202	578	0.624214	3	7;1;1	7	7	Tceb2	Transcription elongation factor B polypeptide 2	IPI00131224	IPI00131224;IPI00346337;IPI00885320	P62869	>IPI:IPI00131224.1|SWISS-PROT:P62869|ENSEMBL:ENSMUSP00000066210|REFSEQ:NP_080581 Tax_Id=10090 Gene_Symbol=Tceb2 Transcription elongation factor B polypeptide 2
NaN	NaN	NaN	3.63557	0.497909	0.498057	0.400481	0.666178	0.381243	0.408764	0.336587	0.335334	0.911577	0.454607	NaN	0.470124	0.48752	0.540044	0.184686	0.415196	0.349004	0.264669	0.450552	NaN	579	0.209823	9	6;6;6;6;6;6;6;2;1	6	6	Gtf2i	Isoform 1 of General transcription factor II-I	IPI00113686;IPI00229535;IPI00395163;IPI00229538;IPI00761775;IPI00229536;IPI00876528	IPI00113686;IPI00229535;IPI00395163;IPI00229538;IPI00761775;IPI00229536;IPI00876528;IPI00849451;IPI00118838	Q9ESZ8-1	>IPI:IPI00113686.2|SWISS-PROT:Q9ESZ8-1|ENSEMBL:ENSMUSP00000049625|REFSEQ:NP_001074215 Tax_Id=10090 Gene_Symbol=Gtf2i Isoform 1 of General transcription factor II-I;>IPI:IPI00229535.2|SWISS-PROT:Q9ESZ8-2|ENSEMBL:ENSMUSP00000106892|REFSEQ:NP_034495 Tax_Id=10
2.76419	4.43498	4.05482	4.90653	4.3501	3.944	3.76804	3.75488	4.31351	5.38561	2.61062	3.03141	3.75333	4.62577	3.88969	4.071	4.13377	3.97298	2.94118	4.17798	3.98899	3.3957	4.89788	3.70288	580	0.980845	3	6;6;3	6	6	Echdc1	Isoform 1 of Enoyl-CoA hydratase domain-containing protein 1	IPI00187288;IPI00828965;IPI00881905	IPI00187288;IPI00828965;IPI00881905	Q9D9V3-1	>IPI:IPI00187288.6|SWISS-PROT:Q9D9V3-1|ENSEMBL:ENSMUSP00000020034|REFSEQ:NP_080131|VEGA:OTTMUSP00000035297 Tax_Id=10090 Gene_Symbol=Echdc1 Isoform 1 of Enoyl-CoA hydratase domain-containing protein 1;>IPI:IPI00828965.1|SWISS-PROT:Q9D9V3-2|TREMBL:Q9CTC5|REF
1.36863	NaN	2.15095	NaN	NaN	1.83604	2.06054	1.95377	NaN	1.3511	NaN	NaN	1.82999	1.28324	1.90429	1.61426	2.17789	2.26439	NaN	1.69351	NaN	1.6049	1.94186	1.87645	581	0.49206	3	6;6;2	6	6	Strn3	Striatin-3	IPI00229990;IPI00955742	IPI00229990;IPI00955742;IPI00903368	Q9ERG2	>IPI:IPI00229990.7|SWISS-PROT:Q9ERG2|TREMBL:B3STQ4;Q3UTR6|ENSEMBL:ENSMUSP00000013130|REFSEQ:NP_443205 Tax_Id=10090 Gene_Symbol=Strn3 Striatin-3;>IPI:IPI00955742.1|TREMBL:B2RQS1;B3STQ3;Q3TNV4|REFSEQ:NP_001165569 Tax_Id=10090 Gene_Symbol=Strn3 striatin-3 iso
1.2735	2.18885	1.70532	NaN	1.47356	1.4005	1.29601	1.28007	1.66694	1.81528	1.68987	NaN	1.33531	1.66091	1.90585	1.66772	1.93259	1.41717	1.26958	1.82869	1.27489	1.20213	1.36323	1.26691	582	0.0770826	3	6;6;1	6	6	Cul1	Cullin-1	IPI00124047;IPI00831694	IPI00124047;IPI00831694;IPI00830175	Q9WTX6	>IPI:IPI00124047.1|SWISS-PROT:Q9WTX6|TREMBL:Q05DR6;Q3UIA5|ENSEMBL:ENSMUSP00000031697|REFSEQ:NP_036172|VEGA:OTTMUSP00000025305 Tax_Id=10090 Gene_Symbol=Cul1 Cullin-1;>IPI:IPI00831694.1|TREMBL:Q3TPM3|ENSEMBL:ENSMUSP00000122702|VEGA:OTTMUSP00000025306 Tax_Id=
7.414	4.45633	1.38376	NaN	5.73493	3.75375	4.66483	NaN	NaN	NaN	NaN	NaN	5.52334	4.36414	11.8731	10.0312	2.03083	NaN	1.6253	NaN	2.62323	8.86839	NaN	NaN	583	0.169862	2	6;6	6	6	Acot11	Acyl-CoA thioesterase 11	IPI00623737;IPI00128588	IPI00623737;IPI00128588	A2AVR6	>IPI:IPI00623737.2|TREMBL:A2AVR6|ENSEMBL:ENSMUSP00000069636|VEGA:OTTMUSP00000008557 Tax_Id=10090 Gene_Symbol=Acot11 Acyl-CoA thioesterase 11;>IPI:IPI00128588.1|SWISS-PROT:Q8VHQ9|TREMBL:Q3TBG4;Q543P6;Q80TT9;Q8CAL6|ENSEMBL:ENSMUSP00000099823|REFSEQ:NP_079866
0.625117	0.916087	1.07731	0.980008	0.800256	0.917011	0.83696	1.46336	0.72338	0.787216	0.813603	0.696524	0.980681	1.01029	0.905059	0.978665	0.844666	1.22027	0.976277	0.913576	1.02942	0.801346	0.842389	0.865127	584	0.281509	3	6;5;3	6	6	Armc6	Isoform 1 of Armadillo repeat-containing protein 6	IPI00403909;IPI00762866;IPI00957025	IPI00403909;IPI00762866;IPI00957025	Q8BNU0-1	>IPI:IPI00403909.2|SWISS-PROT:Q8BNU0-1|ENSEMBL:ENSMUSP00000019679|REFSEQ:NP_598733|VEGA:OTTMUSP00000025055 Tax_Id=10090 Gene_Symbol=Armc6 Isoform 1 of Armadillo repeat-containing protein 6;>IPI:IPI00762866.1|SWISS-PROT:Q8BNU0-2 Tax_Id=10090 Gene_Symbol=Arm
0.696913	1.07607	0.948587	1.12098	0.951203	1.00129	0.906947	1.11241	0.905633	0.893575	0.873286	0.841893	0.928247	1.0273	0.867152	1.06137	1.00152	1.17987	0.808277	1.09901	0.990393	0.806647	0.940468	0.943396	585	0.660622	2	6;4	6	6	Pdcd5;Gm3837;Tfar19		IPI00116120;IPI00885252	IPI00116120;IPI00885252	P56812	>IPI:IPI00116120.3|SWISS-PROT:P56812|TREMBL:D3YVV5;Q564F6|ENSEMBL:ENSMUSP00000032577;ENSMUSP00000113761|REFSEQ:NP_062720;XP_001476231;XP_001478306|VEGA:OTTMUSP00000038236 Tax_Id=10090 Gene_Symbol=Pdcd5;Gm3837 Putative uncharacterized protein Pdcd5;>IPI:IPI
0.55919	0.818197	0.824131	1.00731	0.688137	0.757002	0.719942	0.933707	0.732386	0.882846	0.727114	0.668003	0.772022	0.739919	0.843313	0.786844	0.856678	0.796369	0.471142	0.770416	0.825968	0.604412	0.750188	0.68055	586	0.910727	2	6;3	6	6	Pfdn2	Prefoldin subunit 2	IPI00119545;IPI00831338	IPI00119545;IPI00831338	O70591	>IPI:IPI00119545.2|SWISS-PROT:O70591|ENSEMBL:ENSMUSP00000120106|REFSEQ:NP_035200|VEGA:OTTMUSP00000024279 Tax_Id=10090 Gene_Symbol=Pfdn2 Prefoldin subunit 2;>IPI:IPI00831338.1|ENSEMBL:ENSMUSP00000006579|VEGA:OTTMUSP00000024280 Tax_Id=10090 Gene_Symbol=Pfdn2
0.29753	0.60006	0.599952	0.649056	0.462321	0.439715	0.434386	0.649266	0.447607	0.53251	0.455519	0.450572	0.518888	0.599592	0.475715	0.706564	0.579676	0.542152	0.299043	0.563475	0.365872	0.450025	0.558098	0.481209	587	0.822612	7	5;5;5;5;5;5;5	5	5	Ubap2l	Isoform 5 of Ubiquitin-associated protein 2-like	IPI00407835;IPI00761937;IPI00622375;IPI00761299;IPI00889845;IPI00761172;IPI00889927	IPI00407835;IPI00761937;IPI00622375;IPI00761299;IPI00889845;IPI00761172;IPI00889927	Q80X50-5	>IPI:IPI00407835.2|SWISS-PROT:Q80X50-5|ENSEMBL:ENSMUSP00000066138|REFSEQ:NP_001159455 Tax_Id=10090 Gene_Symbol=Ubap2l Isoform 5 of Ubiquitin-associated protein 2-like;>IPI:IPI00761937.1|SWISS-PROT:Q80X50-1|TREMBL:Q3TSB0;Q8BKR4;Q8BZ69|REFSEQ:NP_001159456 Ta
10.2216	5.34131	6.64717	6.68941	9.14662	8.71384	8.10176	4.81789	12.534	7.08667	6.17932	13.3957	3.92449	8.62738	11.6802	10.6081	6.22936	7.96115	12.5775	6.13384	8.40124	13.933	11.8289	13.9753	588	0.3658	5	30;30;23;3;2	30	5	Mapt	Microtubule-associated protein	IPI00649104;IPI00113584;IPI00407807	IPI00649104;IPI00113584;IPI00407807;IPI00648252;IPI00648018	P10637-1	>IPI:IPI00649104.1|SWISS-PROT:P10637-1|TREMBL:A2A5Y6|ENSEMBL:ENSMUSP00000018555;ENSMUSP00000102602|VEGA:OTTMUSP00000003080 Tax_Id=10090 Gene_Symbol=Mapt Microtubule-associated protein;>IPI:IPI00113584.2|ENSEMBL:ENSMUSP00000102601|VEGA:OTTMUSP00000003079 Ta
1.24525	1.73488	2.01296	1.93938	1.68702	1.77292	1.94065	1.86029	1.66323	1.77734	1.27288	1.39123	1.8741	1.69489	1.74856	2.0816	1.5528	1.94284	1.04288	1.86668	1.89322	1.35525	1.54435	1.95523	589	0.578482	2	5;5	5	5	Scg3	Secretogranin-3	IPI00112446;IPI00944768	IPI00112446;IPI00944768	P47867	>IPI:IPI00112446.1|SWISS-PROT:P47867|TREMBL:Q3UTT1;Q3UZT8|ENSEMBL:ENSMUSP00000034699|REFSEQ:NP_033156 Tax_Id=10090 Gene_Symbol=Scg3 Secretogranin-3;>IPI:IPI00944768.1|TREMBL:Q8R1D7|REFSEQ:NP_001158262 Tax_Id=10090 Gene_Symbol=Scg3 secretogranin-3 isoform 2
1.38962	2.46938	2.69136	2.66219	NaN	1.97161	1.33115	2.22667	NaN	1.6647	1.53025	1.37885	2.87977	2.55278	2.13415	2.70446	1.96827	NaN	NaN	2.04436	1.94337	NaN	NaN	1.85004	590	0.0856302	5	5;4;2;2;1	5	5	Faf2	Isoform 1 of FAS-associated factor 2	IPI00265386;IPI00761513	IPI00265386;IPI00761513;IPI00918561;IPI00918624;IPI00918475	Q3TDN2-1	>IPI:IPI00265386.5|SWISS-PROT:Q3TDN2-1|ENSEMBL:ENSMUSP00000121182|REFSEQ:NP_848484|VEGA:OTTMUSP00000043485 Tax_Id=10090 Gene_Symbol=Faf2 Isoform 1 of FAS-associated factor 2;>IPI:IPI00761513.1|SWISS-PROT:Q3TDN2-2|ENSEMBL:ENSMUSP00000026991|VEGA:OTTMUSP0000
0.396983	0.656901	0.795482	0.782963	0.634558	0.566733	0.56443	0.662691	0.525845	0.773934	0.654279	0.557351	0.97972	0.747161	0.496795	0.781067	0.769053	0.82149	0.956938	0.65304	0.58524	0.456955	0.640123	0.546299	591	0.223175	2	5;4	5	5	Ranbp3	Ran-binding protein 3	IPI00135190;IPI00876069	IPI00135190;IPI00876069	Q9CT10	>IPI:IPI00135190.3|SWISS-PROT:Q9CT10|ENSEMBL:ENSMUSP00000002445|REFSEQ:NP_082209 Tax_Id=10090 Gene_Symbol=Ranbp3 Ran-binding protein 3;>IPI:IPI00876069.1|ENSEMBL:ENSMUSP00000108597 Tax_Id=10090 Gene_Symbol=Ranbp3 52 kDa protein
1.37321	1.70829	1.23591	1.71999	2.27728	2.15012	1.97379	1.79914	1.37084	1.58876	2.04733	1.72649	1.26086	1.79607	2.22826	2.79166	1.07421	2.07594	1.70864	1.85237	1.87998	1.97285	1.7496	1.87164	592	0.318845	2	5;4	5	5	Pycrl	Pyrroline-5-carboxylate reductase 3	IPI00153234;IPI00816895	IPI00153234;IPI00816895	Q9DCC4	>IPI:IPI00153234.2|SWISS-PROT:Q9DCC4|ENSEMBL:ENSMUSP00000049605|REFSEQ:NP_079688 Tax_Id=10090 Gene_Symbol=Pycrl Pyrroline-5-carboxylate reductase 3;>IPI:IPI00816895.1|TREMBL:D3Z7J2|ENSEMBL:ENSMUSP00000023232 Tax_Id=10090 Gene_Symbol=Pycrl Putative uncharac
0.161467	0.323499	0.345949	0.318654	0.196464	0.158438	0.108757	0.257023	0.203227	0.206407	0.183581	0.143219	0.348444	0.299428	0.153078	0.206693	0.275285	0.199037	0.251794	0.265034	0.147586	0.242301	0.161812	0.186787	593	0.141323	3	5;3;2	5	5	Dcakd	Dephospho-CoA kinase domain-containing protein	IPI00886236;IPI00885279	IPI00886236;IPI00885279;IPI00221828	Q8BHC4	>IPI:IPI00886236.1|SWISS-PROT:Q8BHC4|ENSEMBL:ENSMUSP00000021313|REFSEQ:NP_080827|VEGA:OTTMUSP00000003094 Tax_Id=10090 Gene_Symbol=Dcakd Dephospho-CoA kinase domain-containing protein;>IPI:IPI00885279.1|TREMBL:B0QZX9|ENSEMBL:ENSMUSP00000118827|VEGA:OTTMUSP0
4.20858	4.42204	4.35294	5.97943	4.16424	4.65095	4.42968	3.75728	4.23549	4.10728	4.05811	3.5312	4.36567	4.41384	4.51794	3.90869	4.06207	4.3352	4.0833	4.76168	4.25242	2.93393	4.17293	4.31593	594	0.312423	3	5;3;1	5	5	Gss	Glutathione synthetase	IPI00127691;IPI00754965	IPI00127691;IPI00754965;IPI00752835	P51855	>IPI:IPI00127691.1|SWISS-PROT:P51855|TREMBL:Q3TWM2;Q3UEE2;Q541E2;Q8R436|ENSEMBL:ENSMUSP00000078630|REFSEQ:NP_032206|VEGA:OTTMUSP00000017226 Tax_Id=10090 Gene_Symbol=Gss Glutathione synthetase;>IPI:IPI00754965.1|TREMBL:A2AQN9;Q3TF63|ENSEMBL:ENSMUSP000001226
0.122	0.177519	0.177088	0.262474	0.154107	0.150177	0.167068	0.194069	0.161899	0.203128	0.152038	0.132881	0.180209	0.151231	0.132896	0.16632	0.191186	0.181898	0.20876	0.243008	0.148951	0.104422	0.349858	0.177762	595	0.755035	6	5;2;1;1;1;1	5	5	Rpl22;LOC100047372		IPI00222546	IPI00222546;IPI00667777;IPI00660661;IPI00848995;IPI00850585;IPI00755995	P67984	>IPI:IPI00222546.5|SWISS-PROT:P67984|TREMBL:Q4VAG4|ENSEMBL:ENSMUSP00000099480;ENSMUSP00000118787|REFSEQ:NP_033105;XP_001477749|VEGA:OTTMUSP00000011321;OTTMUSP00000011322 Tax_Id=10090 Gene_Symbol=Rpl22;LOC100047372 60S ribosomal protein L22
0.962464	0.954472	1.0292	1.09873	0.993246	1.0913	1.07035	1.02865	1.0679	1.08124	0.950661	0.927988	0.743439	0.894614	1.01046	0.979432	1.01039	0.886053	0.687096	0.978186	0.800961	0.694444	1.01289	0.890789	596	0.107518	4	30;25;8;6	35	5	Dpysl3	Collapsin response mediator protein 4A	IPI00406447;IPI00881485	IPI00406447;IPI00881485;IPI00880785;IPI00881742	Q71H74	>IPI:IPI00406447.3|TREMBL:Q71H74|ENSEMBL:ENSMUSP00000089536;ENSMUSP00000112928|VEGA:OTTMUSP00000038047 Tax_Id=10090 Gene_Symbol=Dpysl3 Collapsin response mediator protein 4A;>IPI:IPI00881485.1|TREMBL:Q3TAS8;Q3TT92|ENSEMBL:ENSMUSP00000113711|REFSEQ:NP_00112
0.597979	0.878889	0.923702	1.05664	0.757174	0.812744	0.796242	0.848104	0.788208	0.841538	0.765814	0.758668	0.884877	1.02902	0.971062	0.969086	0.917179	0.872829	0.637918	0.90777	0.847673	0.764935	0.814001	0.731101	597	0.290691	7	44;34;18;16;12;9;8	44	44	Hspd1	Isoform 1 of 60 kDa heat shock protein, mitochondrial	IPI00308885;IPI00461249	IPI00308885;IPI00461249;IPI00845678;IPI00830313;IPI00830195;IPI00749932;IPI00853695	P63038-1	>IPI:IPI00308885.6|SWISS-PROT:P63038-1|ENSEMBL:ENSMUSP00000027123|REFSEQ:NP_034607|VEGA:OTTMUSP00000024365 Tax_Id=10090 Gene_Symbol=Hspd1 Isoform 1 of 60 kDa heat shock protein, mitochondrial;>IPI:IPI00461249.1|REFSEQ:XP_484008 Tax_Id=10090 Gene_Symbol=Gm1
1.09129	NaN	2.01682	2.14634	1.58557	1.97593	1.71939	1.64794	1.53624	1.78113	1.532	1.39978	1.2534	1.67104	1.45321	2.05394	1.89689	2.2241	1.2631	1.64093	1.75682	1.35457	1.53294	1.29171	598	0.853721	4	4;4;4;3	4	4	Uba3	NEDD8-activating enzyme E1 catalytic subunit isoform 1	IPI00453622;IPI00880843;IPI00471447;IPI00226943	IPI00453622;IPI00880843;IPI00471447;IPI00226943	Q8C878-2	>IPI:IPI00453622.2|SWISS-PROT:Q8C878-2|TREMBL:Q3TG68|ENSEMBL:ENSMUSP00000086701|REFSEQ:NP_035796 Tax_Id=10090 Gene_Symbol=Uba3 NEDD8-activating enzyme E1 catalytic subunit isoform 1;>IPI:IPI00880843.1|TREMBL:Q3TL72|REFSEQ:NP_001104576 Tax_Id=10090 Gene_Sym
1.0675	2.09604	1.78072	NaN	1.56656	1.94273	1.19679	2.4975	NaN	0.797003	NaN	NaN	NaN	1.63289	1.29933	1.52816	NaN	NaN	0.907194	NaN	1.35722	NaN	0.577834	1.09539	599	0.165697	3	4;4;4	4	4	Nt5c2	cytosolic purine 5-nucleotidase isoform 1	IPI00944164;IPI00944120;IPI00111489	IPI00944164;IPI00944120;IPI00111489	Q3V1L4;Q6P223;Q9D8G6;Q8BZ43	>IPI:IPI00944164.1|REFSEQ:NP_001157835 Tax_Id=10090 Gene_Symbol=Nt5c2 cytosolic purine 5-nucleotidase isoform 1;>IPI:IPI00944120.1|REFSEQ:NP_001157837 Tax_Id=10090 Gene_Symbol=Nt5c2 cytosolic purine 5-nucleotidase isoform 2;>IPI:IPI00111489.9|SWISS-PROT:
0.776699	0.98668	0.858811	1.23445	0.980681	0.905961	0.833611	1.01011	0.859254	0.912076	0.79466	0.833681	0.918695	0.984543	0.866551	0.970026	0.968805	0.979336	0.608717	0.868206	0.776277	0.695991	0.845166	0.920133	600	0.471381	2	4;4	4	4	Nploc4	Isoform 1 of Nuclear protein localization protein 4 homolog	IPI00465884;IPI00118766	IPI00465884;IPI00118766	P60670-1	>IPI:IPI00465884.7|SWISS-PROT:P60670-1|TREMBL:Q3UDU9;Q3UE06|ENSEMBL:ENSMUSP00000035851|VEGA:OTTMUSP00000004607 Tax_Id=10090 Gene_Symbol=Nploc4 Isoform 1 of Nuclear protein localization protein 4 homolog;>IPI:IPI00118766.6|SWISS-PROT:P60670-2|ENSEMBL:ENSMUS
0.28116	0.515013	0.618735	0.568666	0.410897	0.416181	0.418989	0.564462	0.51036	0.524494	0.358976	0.312432	0.73078	0.467006	0.395038	0.487401	0.47576	0.506971	0.492854	0.41137	0.3641	0.314634	0.455125	0.393778	601	0.549873	2	9;9	9	4	Api5	Putative uncharacterized protein	IPI00399961;IPI00754418	IPI00399961;IPI00754418	Q3U517;Q3UYQ4	>IPI:IPI00399961.2|TREMBL:Q3U517;Q3UYQ4|ENSEMBL:ENSMUSP00000028617|REFSEQ:NP_031492|VEGA:OTTMUSP00000015342 Tax_Id=10090 Gene_Symbol=Api5 Putative uncharacterized protein;>IPI:IPI00754418.1|SWISS-PROT:O35841 Tax_Id=10090 Gene_Symbol=Api5 Apoptosis inhibito
1.06333	2.14601	1.86345	1.97461	2.02897	1.83496	1.88278	2.3672	1.48159	1.78952	1.52653	1.37378	3.17581	2.27324	1.76196	1.97773	1.91813	2.48429	2.25464	1.44317	1.56588	1.21984	1.86098	1.60285	602	0.114642	4	4;3;3;1	5	4	Acsl3	long-chain-fatty-acid--CoA ligase 3	IPI00651798;IPI00169772;IPI00915057	IPI00651798;IPI00169772;IPI00915057;IPI00957121	Q8K1J7	>IPI:IPI00651798.1|TREMBL:Q8K1J7|ENSEMBL:ENSMUSP00000012393;ENSMUSP00000045291;ENSMUSP00000109149;ENSMUSP00000121695|REFSEQ:NP_001028778;NP_083093|VEGA:OTTMUSP00000044415;OTTMUSP00000044417 Tax_Id=10090 Gene_Symbol=Acsl3 long-chain-fatty-acid--CoA ligase 3
0.878503	2.26014	2.14064	1.7984	1.58125	NaN	1.01688	NaN	1.21495	NaN	NaN	1.3117	2.1878	2.83238	1.48754	2.24155	0.834098	2.13324	1.31223	1.19713	1.74941	1.26807	1.63441	1.10215	603	0.275184	2	4;3	4	4	Pepd	Xaa-Pro dipeptidase	IPI00406419;IPI00874597	IPI00406419;IPI00874597	Q11136	>IPI:IPI00406419.4|SWISS-PROT:Q11136|TREMBL:A2RS23|ENSEMBL:ENSMUSP00000075683|REFSEQ:NP_032846|VEGA:OTTMUSP00000042019 Tax_Id=10090 Gene_Symbol=Pepd Xaa-Pro dipeptidase;>IPI:IPI00874597.1|ENSEMBL:ENSMUSP00000103699 Tax_Id=10090 Gene_Symbol=Pepd 55 kDa prot
0.369345	0.464382	0.572279	0.550237	0.53118	0.640861	0.507202	0.685448	0.588616	0.552212	0.371347	0.328893	0.511038	0.404694	0.484402	0.574383	0.570711	0.689941	0.578737	0.496672	0.620424	0.549602	0.574647	0.503043	604	0.20413	3	4;2;2	9	4	Nme2	Nucleoside diphosphate kinase B	IPI00127417;IPI00408489;IPI00379441	IPI00127417;IPI00408489;IPI00379441	Q01768	>IPI:IPI00127417.1|SWISS-PROT:Q01768|TREMBL:B0LAA8;Q5NC82|ENSEMBL:ENSMUSP00000021217;ENSMUSP00000103476|REFSEQ:NP_001070997;NP_032731|VEGA:OTTMUSP00000001443;OTTMUSP00000001444 Tax_Id=10090 Gene_Symbol=Nme2 Nucleoside diphosphate kinase B;>IPI:IPI00408489.
1.07955	1.64935	1.53704	1.85041	1.31173	1.26817	1.20163	1.69947	1.55161	1.57654	1.27765	1.31249	1.59928	1.35556	1.40978	1.62652	1.60953	1.25933	1.15508	1.5623	1.60658	1.15734	1.32792	1.17342	605	0.779484	2	4;1	4	4	Sh3bgrl3	SH3 domain-binding glutamic acid-rich-like protein 3	IPI00127358	IPI00127358;IPI00649952	Q91VW3	>IPI:IPI00127358.1|SWISS-PROT:Q91VW3|ENSEMBL:ENSMUSP00000030651|REFSEQ:NP_542126|VEGA:OTTMUSP00000011036 Tax_Id=10090 Gene_Symbol=Sh3bgrl3 SH3 domain-binding glutamic acid-rich-like protein 3
9.1416	4.78515	5.22139	5.69801	7.65873	9.15919	7.63592	5.17759	8.60511	9.51656	10.8553	10.5947	4.47207	5.56514	8.02762	5.67537	6.43998	5.80889	8.76194	10.2562	6.29129	9.12409	7.48783	13.6221	606	0.0598524	3	40;38;0	64	37	Atp1a3	Sodium/potassium-transporting ATPase subunit alpha-3	IPI00122048;IPI00752412	IPI00122048;IPI00752412;IPI00230680	Q6PIC6	>IPI:IPI00122048.2|SWISS-PROT:Q6PIC6|TREMBL:Q8CGD9;Q8R0B0;Q8R0E8|ENSEMBL:ENSMUSP00000079691|VEGA:OTTMUSP00000017754 Tax_Id=10090 Gene_Symbol=Atp1a3 Sodium/potassium-transporting ATPase subunit alpha-3;>IPI:IPI00752412.1|TREMBL:Q8VCE0|ENSEMBL:ENSMUSP0000009
16.0023	6.88373	7.19476	5.15756	13.5192	11.3537	12.5846	8.69414	14.7927	10.9677	11.4684	18.3966	3.92742	6.39836	12.0573	10.101	7.06165	9.12242	14.4067	8.992	10.6395	13.3236	17.3247	9.68617	607	0.139659	3	19;17;17	19	3	Mbp	Isoform 4 of Myelin basic protein	IPI00223377;IPI00223593;IPI00223378	IPI00223377;IPI00223593;IPI00223378	P04370-4	>IPI:IPI00223377.1|SWISS-PROT:P04370-4|ENSEMBL:ENSMUSP00000053495;ENSMUSP00000121855|REFSEQ:NP_001020422|VEGA:OTTMUSP00000017520 Tax_Id=10090 Gene_Symbol=Mbp Isoform 4 of Myelin basic protein;>IPI:IPI00223593.1|SWISS-PROT:P04370-10|ENSEMBL:ENSMUSP000001103
NaN	NaN	NaN	NaN	5.33419	5.21866	5.48907	4.39541	2.67501	5.02942	NaN	4.61021	1.71265	3.75968	6.58068	4.28027	NaN	6.39304	4.49034	NaN	0.815395	6.65646	NaN	NaN	608	0.590838	4	3;3;2;1	3	3	Acox1	Putative uncharacterized protein	IPI00409360;IPI00828479;IPI00127558	IPI00409360;IPI00828479;IPI00127558;IPI00404355	Q8BW35;Q8BYC3	>IPI:IPI00409360.3|TREMBL:Q8BW35;Q8BYC3|ENSEMBL:ENSMUSP00000063325|REFSEQ:NP_056544|VEGA:OTTMUSP00000003995 Tax_Id=10090 Gene_Symbol=Acox1 Putative uncharacterized protein;>IPI:IPI00828479.1|TREMBL:A2A850|ENSEMBL:ENSMUSP00000072717|VEGA:OTTMUSP00000003996
0.753182	1.21643	1.40641	1.72551	1.10538	0.940557	1.22754	1.3565	1.01062	1.19979	1.0279	1.1637	1.78571	1.51644	0.952653	1.56074	NaN	1.40302	0.783822	0.967211	1.12505	0.926698	1.20187	1.08182	609	0.474426	3	3;3;2	3	3	Plaa	Phospholipase A-2-activating protein	IPI00226234;IPI00828952;IPI00649175	IPI00226234;IPI00828952;IPI00649175	P27612	>IPI:IPI00226234.5|SWISS-PROT:P27612 Tax_Id=10090 Gene_Symbol=Plaa Phospholipase A-2-activating protein;>IPI:IPI00828952.1|TREMBL:A4QPD6|ENSEMBL:ENSMUSP00000102724|REFSEQ:NP_766283|VEGA:OTTMUSP00000008214 Tax_Id=10090 Gene_Symbol=Plaa phospholipase A-2-act
1.79466	0.475851	0.682128	1.79379	1.36205	1.86449	1.32038	1.60097	1.21733	1.82229	1.4739	1.23873	2.48435	0.267594	1.09081	1.71804	1.52581	2.37299	2.0963	2.00928	1.76227	2.01151	1.56424	1.4715	610	0.399441	2	3;2	3	3	Mrps36	28S ribosomal protein S36, mitochondrial	IPI00315808;IPI00856534	IPI00315808;IPI00856534	Q9CQX8	>IPI:IPI00315808.3|SWISS-PROT:Q9CQX8|ENSEMBL:ENSMUSP00000104957|REFSEQ:NP_079645|VEGA:OTTMUSP00000026287 Tax_Id=10090 Gene_Symbol=Mrps36 28S ribosomal protein S36, mitochondrial;>IPI:IPI00856534.1|TREMBL:Q9D6T9|ENSEMBL:ENSMUSP00000104954|VEGA:OTTMUSP000000
1.12382	1.69047	NaN	NaN	1.98476	2.47862	2.34736	2.97708	2.37784	2.52532	2.13904	1.56065	3.00806	2.37773	1.87582	2.55918	2.30054	2.65365	0.85237	1.94636	1.96583	1.49815	2.45622	1.82702	611	0.231897	3	3;1;1	3	3	Trim32	E3 ubiquitin-protein ligase TRIM32	IPI00321005	IPI00321005;IPI00648213;IPI00650044	Q8CH72	>IPI:IPI00321005.5|SWISS-PROT:Q8CH72|TREMBL:Q3TLR3;Q99PN6|ENSEMBL:ENSMUSP00000062277;ENSMUSP00000102989|REFSEQ:NP_001155254;NP_444314|VEGA:OTTMUSP00000000377;OTTMUSP00000001221 Tax_Id=10090 Gene_Symbol=Trim32 E3 ubiquitin-protein ligase TRIM32
0.438212	0.910001	0.972857	1.13821	0.640451	0.612445	0.717824	0.77682	0.729182	0.750638	0.586751	0.656599	1.4812	1.03146	0.773754	0.916506	0.50958	0.953925	0.428412	0.761557	0.780396	0.523478	0.771248	0.69847	612	0.188308	2	3;1	6	3	Kpna4	Importin subunit alpha-4	IPI00129792;IPI00882353	IPI00129792;IPI00882353	O35343	>IPI:IPI00129792.1|SWISS-PROT:O35343|TREMBL:Q3UGH8;Q4FJX1|ENSEMBL:ENSMUSP00000029353|REFSEQ:NP_032493|VEGA:OTTMUSP00000037101 Tax_Id=10090 Gene_Symbol=Kpna4 Importin subunit alpha-4;>IPI:IPI00882353.1|TREMBL:D3YTN1|ENSEMBL:ENSMUSP00000121076|VEGA:OTTMUSP00
7.39044	3.74855	4.56642	4.33595	8.69565	5.95203	4.52981	4.31258	4.82393	4.99401	5.44425	5.07305	1.60676	3.44364	6.25665	3.26158	4.24881	5.66668	3.21833	4.32227	5.87233	6.43252	7.18597	6.44704	613	0.0780806	4	22;22;22;22	22	21	Dpp6	dipeptidyl aminopeptidase-like protein 6 isoform 3	IPI00880742;IPI00130389;IPI00762083;IPI00881709	IPI00880742;IPI00130389;IPI00762083;IPI00881709	Q3TY19	>IPI:IPI00880742.1|TREMBL:Q3TY19|ENSEMBL:ENSMUSP00000113441|REFSEQ:NP_997165|VEGA:OTTMUSP00000037942 Tax_Id=10090 Gene_Symbol=Dpp6 dipeptidyl aminopeptidase-like protein 6 isoform 3;>IPI:IPI00130389.3|SWISS-PROT:Q9Z218|ENSEMBL:ENSMUSP00000071435|REFSEQ:NP_
1.00928	1.25331	1.22546	1.54014	1.3328	1.3897	1.17951	1.49748	1.37665	1.44739	1.20975	1.21941	1.57594	1.22549	1.18789	1.42144	1.4551	1.68257	1.12381	1.16469	1.35161	1.05252	1.29971	1.27828	614	0.900754	2	20;20	20	20	Lta4h	Leukotriene A-4 hydrolase	IPI00229527;IPI00798439	IPI00229527;IPI00798439	P24527	>IPI:IPI00229527.7|SWISS-PROT:P24527 Tax_Id=10090 Gene_Symbol=Lta4h Leukotriene A-4 hydrolase;>IPI:IPI00798439.1|TREMBL:Q3UY71|ENSEMBL:ENSMUSP00000016033|REFSEQ:NP_032543 Tax_Id=10090 Gene_Symbol=Lta4h leukotriene A-4 hydrolase
2.49963	2.8165	3.30863	3.31148	3.89499	2.99168	4.1848	2.36586	5.08027	4.42517	3.84276	3.56722	1.87287	3.78186	4.06951	3.21316	2.60044	3.49932	15.1224	3.67552	4.5041	3.35289	7.41015	7.61556	615	0.25461	5	22;21;21;21;20	22	20	Cacna2d1	Isoform 2E of Voltage-dependent calcium channel subunit alpha-2/delta-1	IPI00319970;IPI00626793;IPI00407868;IPI00230013;IPI00410982	IPI00319970;IPI00626793;IPI00407868;IPI00230013;IPI00410982	O08532-5	>IPI:IPI00319970.1|SWISS-PROT:O08532-5|ENSEMBL:ENSMUSP00000110936|REFSEQ:NP_001104314 Tax_Id=10090 Gene_Symbol=Cacna2d1 Isoform 2E of Voltage-dependent calcium channel subunit alpha-2/delta-1;>IPI:IPI00626793.3|SWISS-PROT:O08532-1|ENSEMBL:ENSMUSP0000004945
0.873668	1.02366	1.02403	1.19316	0.847099	0.655179	0.651338	0.96918	0.717772	1.08295	0.719683	0.846095	2.06958	0.895335	1.15035	1.1883	1.02483	1.03396	1.12241	0.93791	1.0582	0.612708	1.2581	1.21844	616	0.0978475	8	11;11;10;9;8;0;0;0	33	2	Actc1	Actin, alpha cardiac muscle 1	IPI00114593;IPI00480406;IPI00654242;IPI00110827;IPI00653007	IPI00114593;IPI00480406;IPI00654242;IPI00110827;IPI00653007;IPI00754167;IPI00229224;IPI00454053	P68033	>IPI:IPI00114593.1|SWISS-PROT:P68033|TREMBL:Q497E4;Q61273;Q61274;Q61275|ENSEMBL:ENSMUSP00000087736|REFSEQ:NP_033738|VEGA:OTTMUSP00000016161 Tax_Id=10090 Gene_Symbol=Actc1 Actin, alpha cardiac muscle 1;>IPI:IPI00480406.1|TREMBL:Q9CXK3 Tax_Id=10090 Gene_Symb
NaN	NaN	NaN	NaN	1.13316	1.12657	1.08179	NaN	NaN	NaN	1.12732	1.23628	0.970309	0.51096	0.826515	0.757518	NaN	0.854263	NaN	NaN	NaN	0.989903	1.02129	NaN	617	0.0547762	5	2;2;1;1;1	2	2	Cryzl1	Isoform 1 of Quinone oxidoreductase-like protein 1	IPI00122320;IPI00880688;IPI00928083;IPI00230387;IPI00928348	IPI00122320;IPI00880688;IPI00928083;IPI00230387;IPI00928348	Q921W4-1	>IPI:IPI00122320.3|SWISS-PROT:Q921W4-1|ENSEMBL:ENSMUSP00000073171|REFSEQ:NP_598440|VEGA:OTTMUSP00000033895 Tax_Id=10090 Gene_Symbol=Cryzl1 Isoform 1 of Quinone oxidoreductase-like protein 1;>IPI:IPI00880688.1|TREMBL:D3Z6I4|ENSEMBL:ENSMUSP00000113227|VEGA:O
4.84731	4.62214	4.69307	5.25348	6.02337	5.13795	5.134	5.17357	5.05689	5.2345	5.24411	7.00035	4.01171	4.65918	5.61073	5.26122	4.74024	5.46956	4.51773	6.37105	5.07923	5.97836	6.64628	6.92905	618	0.137292	2	42;39	42	2	Hk1	hexokinase-1 isoform HK1	IPI00762858;IPI00468553	IPI00762858;IPI00468553	Q3UE51;Q6GQU1	>IPI:IPI00762858.1|TREMBL:Q3UE51;Q6GQU1|ENSEMBL:ENSMUSP00000097282|REFSEQ:NP_001139572|VEGA:OTTMUSP00000046862 Tax_Id=10090 Gene_Symbol=Hk1 hexokinase-1 isoform HK1;>IPI:IPI00468553.3|SWISS-PROT:P17710-3|TREMBL:D3Z2I0;Q3TJE3;Q3UPC4|ENSEMBL:ENSMUSP000000721
0.446668	0.779606	0.797575	1.14389	0.891266	0.988045	0.893416	0.868885	0.855652	0.774174	0.840831	0.826515	0.684556	0.599736	0.711642	1.0528	0.560884	1.00034	0.642591	0.718133	0.866401	0.596267	0.891345	0.739044	619	0.702803	2	6;4	6	2	Sar1a	Putative uncharacterized protein	IPI00115644;IPI00322794	IPI00115644;IPI00322794	Q3TXJ4;Q99JZ4	>IPI:IPI00115644.2|TREMBL:Q3TXJ4;Q99JZ4|ENSEMBL:ENSMUSP00000020285|REFSEQ:NP_033146 Tax_Id=10090 Gene_Symbol=Sar1a Putative uncharacterized protein;>IPI:IPI00322794.1|SWISS-PROT:P36536 Tax_Id=10090 Gene_Symbol=Sar1a GTP-binding protein SAR1a
0.217301	0.336814	0.381869	0.496648	0.315338	0.29627	0.285413	0.404057	0.26547	0.362411	0.31348	0.278427	0.637389	0.31412	0.259222	0.319662	0.334146	0.371319	0.28311	0.285543	0.271547	0.214555	0.297787	0.296833	620	0.630034	3	19;16;4	19	19	Eif3c;Eif3s8	Eukaryotic translation initiation factor 3 subunit C	IPI00321647;IPI00849863	IPI00321647;IPI00849863;IPI00124306	Q8R1B4	>IPI:IPI00321647.2|SWISS-PROT:Q8R1B4|TREMBL:Q3TL08;Q66JU1;Q8BVX3;Q9CSD3;Q9CV26|ENSEMBL:ENSMUSP00000032992|REFSEQ:NP_666312 Tax_Id=10090 Gene_Symbol=Eif3c Eukaryotic translation initiation factor 3 subunit C;>IPI:IPI00849863.1|REFSEQ:XP_001478747 Tax_Id=100
5.60727	3.87132	3.71844	1.75223	2.7171	4.11201	4.54401	1.96638	5.25928	2.65196	4.11947	3.58732	1.86313	2.78102	5.12742	2.55148	2.13333	2.1357	3.90503	2.72443	2.71739	4.69417	4.82882	9.69086	621	0.348731	3	19;16;8	19	17	Add2	Isoform 1 of Beta-adducin	IPI00323122;IPI00400328	IPI00323122;IPI00400328;IPI00311962	Q9QYB8-1	>IPI:IPI00323122.1|SWISS-PROT:Q9QYB8-1|TREMBL:Q8C0Y2|ENSEMBL:ENSMUSP00000032069|REFSEQ:NP_038486 Tax_Id=10090 Gene_Symbol=Add2 Isoform 1 of Beta-adducin;>IPI:IPI00400328.3|SWISS-PROT:Q9QYB8-2 Tax_Id=10090 Gene_Symbol=Add2 Isoform 2 of Beta-adducin
0.490677	0.74744	0.787278	0.797703	0.677277	0.702099	0.681385	0.832709	0.613723	0.607017	0.524907	0.521866	0.950932	0.66538	0.615612	0.737246	0.731689	0.814332	0.764935	0.676133	0.699252	0.516903	0.651423	0.658415	622	0.108162	2	15;15	15	15	Txnrd1	Isoform 1 of Thioredoxin reductase 1, cytoplasmic	IPI00776252;IPI00469251	IPI00776252;IPI00469251	Q9JMH6-1	>IPI:IPI00776252.1|SWISS-PROT:Q9JMH6-1|REFSEQ:NP_001035988 Tax_Id=10090 Gene_Symbol=Txnrd1 Isoform 1 of Thioredoxin reductase 1, cytoplasmic;>IPI:IPI00469251.5|SWISS-PROT:Q9JMH6-2|TREMBL:Q91Y95;Q91Y98|ENSEMBL:ENSMUSP00000020484|REFSEQ:NP_001035978;NP_00103
9.08678	5.97407	6.17551	4.53885	4.62556	6.26645	6.36862	3.59441	4.57561	5.48456	3.95961	6.36943	3.19581	5.15411	7.63126	7.13725	3.70274	3.18522	6.46371	5.47585	7.05169	5.57942	6.0024	5.55555	623	0.604221	3	20;20;7	27	14	Atp2b2	Putative uncharacterized protein Atp2b2	IPI00831180;IPI00127713	IPI00831180;IPI00127713;IPI00463671	D3Z0Z7	>IPI:IPI00831180.1|TREMBL:D3Z0Z7|ENSEMBL:ENSMUSP00000098605|VEGA:OTTMUSP00000020493 Tax_Id=10090 Gene_Symbol=Atp2b2 Putative uncharacterized protein Atp2b2;>IPI:IPI00127713.1|SWISS-PROT:Q9R0K7|TREMBL:Q3UHH0;Q3UHJ3|ENSEMBL:ENSMUSP00000086398;ENSMUSP00000098
0.281508	0.466941	0.509502	0.643418	0.387072	0.425586	0.345554	0.519319	0.39032	0.405301	0.352585	0.309406	0.874814	0.493876	0.44342	0.529157	0.503601	0.493535	0.545375	0.466092	0.368487	0.260464	0.431388	0.428559	624	0.0811661	2	14;14	15	14	Eftud2	116 kDa U5 small nuclear ribonucleoprotein component isoform b	IPI00649950;IPI00469260	IPI00649950;IPI00469260	A2AH85;Q3TMY8;Q3U5Q3;Q6A0E3;Q7TMX4	>IPI:IPI00649950.3|TREMBL:A2AH85;Q3TMY8;Q3U5Q3;Q6A0E3;Q7TMX4|ENSEMBL:ENSMUSP00000021306|REFSEQ:NP_001103465|VEGA:OTTMUSP00000002991 Tax_Id=10090 Gene_Symbol=Eftud2 116 kDa U5 small nuclear ribonucleoprotein component isoform b;>IPI:IPI00469260.3|SWISS-PROT
1.87748	2.82263	2.80513	2.98579	2.28603	2.55369	2.45736	2.99141	2.2687	2.42008	2.67408	2.01033	2.48936	2.83736	2.39987	2.71503	2.88101	2.88276	2.24638	2.60627	2.25281	2.32964	2.29211	2.30425	625	0.47047	2	18;18	18	14	Usp9x	Probable ubiquitin carboxyl-terminal hydrolase FAF-X	IPI00108388;IPI00798468	IPI00108388;IPI00798468	P70398	>IPI:IPI00108388.1|SWISS-PROT:P70398 Tax_Id=10090 Gene_Symbol=Usp9x Probable ubiquitin carboxyl-terminal hydrolase FAF-X;>IPI:IPI00798468.1|TREMBL:A2AD18;Q4FE56;Q8BR77;Q8BS89;Q8C7T5|ENSEMBL:ENSMUSP00000077491;ENSMUSP00000086716;ENSMUSP00000111126|REFSEQ:NP
0.488305	0.605363	0.642921	0.674855	0.520969	0.557196	0.537606	0.6595	0.494389	0.571102	0.482835	0.430533	0.832639	0.584146	0.410004	0.514562	0.584898	0.632391	0.489836	0.470124	0.490461	0.432638	0.465289	0.536653	626	0.383888	2	13;8	13	13	Hdlbp	Vigilin	IPI00123379;IPI00405603	IPI00123379;IPI00405603	Q8VDJ3	>IPI:IPI00123379.1|SWISS-PROT:Q8VDJ3|TREMBL:A0PJE9;Q3U4Z7;Q3V1M8|ENSEMBL:ENSMUSP00000043047|REFSEQ:NP_598569 Tax_Id=10090 Gene_Symbol=Hdlbp Vigilin;>IPI:IPI00405603.1|TREMBL:Q8BX68 Tax_Id=10090 Gene_Symbol=Hdlbp Putative uncharacterized protein
2.53723	3.38558	2.61561	2.54104	3.30874	3.34269	3.33545	2.88226	2.87068	3.65511	3.19	3.11391	3.78558	2.76022	2.82263	2.93841	3.37633	3.53269	2.25759	2.93092	2.8255	2.70783	3.44447	2.93401	627	0.609677	2	12;7	12	12	Lrpap1	Alpha-2-macroglobulin receptor-associated protein	IPI00469307;IPI00856297	IPI00469307;IPI00856297	P55302	>IPI:IPI00469307.2|SWISS-PROT:P55302|TREMBL:Q3TL96;Q52KI7;Q5D0B0;Q6PB52;Q6PEM5;Q6ZY49;Q8C252;Q8K295|ENSEMBL:ENSMUSP00000030986|REFSEQ:NP_038615|VEGA:OTTMUSP00000027009 Tax_Id=10090 Gene_Symbol=Lrpap1 Alpha-2-macroglobulin receptor-associated protein;>IPI:I
0.332237	0.632151	0.534902	0.761325	0.494217	0.52712	0.484731	0.592803	0.434065	0.550903	0.44401	0.418883	0.689465	0.551694	0.463628	0.536021	0.531293	0.542594	0.275012	0.530026	0.389681	0.320503	0.443046	0.479501	628	0.365993	3	13;12;12	13	12	Srsf1; Sfrs1;LOC100048559		IPI00420807;IPI00457656;IPI00515505	IPI00420807;IPI00457656;IPI00515505	Q6PDM2-1	>IPI:IPI00420807.3|SWISS-PROT:Q6PDM2-1|ENSEMBL:ENSMUSP00000120595|REFSEQ:NP_775550;XP_001480947|VEGA:OTTMUSP00000001418;OTTMUSP00000042503 Tax_Id=10090 Gene_Symbol=Sfrs1;LOC100048559 Isoform 1 of Splicing factor, arginine/serine-rich 1;>IPI:IPI00457656.3|S
1.75018	2.28791	2.60044	2.73023	1.99247	2.19978	2.23769	2.65062	2.02692	2.0156	1.88989	1.81805	2.40941	2.49551	2.17566	2.07676	2.62667	2.34747	1.78667	2.2665	2.45134	2.44846	2.30229	2.22886	629	0.308728	2	11;11	11	11	Aifm1	Apoptosis-inducing factor 1, mitochondrial	IPI00129577;IPI00776047	IPI00129577;IPI00776047	Q9Z0X1	>IPI:IPI00129577.1|SWISS-PROT:Q9Z0X1|TREMBL:B1AU24;Q1L6K5|ENSEMBL:ENSMUSP00000041104|REFSEQ:NP_036149|VEGA:OTTMUSP00000019157 Tax_Id=10090 Gene_Symbol=Aifm1 Apoptosis-inducing factor 1, mitochondrial;>IPI:IPI00776047.1|TREMBL:B1AU25;Q2QKE3|ENSEMBL:ENSMUSP0
1.26041	1.95312	2.21357	3.37941	1.87913	1.47314	2.0605	2.09358	1.69182	2.49383	1.48787	2.01321	3.16056	2.69056	2.20634	2.98098	1.95179	2.35073	1.25529	1.75979	1.93964	1.56885	1.92541	1.99124	630	0.173019	3	10;9;3	10	10	Nucb1	Nucleobindin-1	IPI00132314;IPI00654387	IPI00132314;IPI00654387;IPI00857292	Q02819	>IPI:IPI00132314.1|SWISS-PROT:Q02819|TREMBL:Q8BRD3|ENSEMBL:ENSMUSP00000033096|REFSEQ:NP_001157134|VEGA:OTTMUSP00000029247 Tax_Id=10090 Gene_Symbol=Nucb1 Nucleobindin-1;>IPI:IPI00654387.4|TREMBL:D3Z7D7;Q3TCI1|ENSEMBL:ENSMUSP00000116036|REFSEQ:NP_032775|VEGA
0.391175	0.559441	0.579878	0.683807	0.54019	0.548396	0.543656	0.664805	0.582377	0.622743	0.454174	0.458989	0.805867	0.588859	0.552425	0.675356	0.630279	0.637471	0.430348	0.562905	0.536251	0.483115	0.484637	0.579744	631	0.453384	2	10;10	10	10	Prkcsh	Isoform 2 of Glucosidase 2 subunit beta	IPI00122353;IPI00115680	IPI00122353;IPI00115680	O08795-2	>IPI:IPI00122353.1|SWISS-PROT:O08795-2|TREMBL:Q3TWG2;Q9WVP2|ENSEMBL:ENSMUSP00000110987 Tax_Id=10090 Gene_Symbol=Prkcsh Isoform 2 of Glucosidase 2 subunit beta;>IPI:IPI00115680.1|SWISS-PROT:O08795-1|TREMBL:Q3U518;Q9R1N5|ENSEMBL:ENSMUSP00000003493|REFSEQ:NP_
1.90349	2.51439	2.2479	2.8056	2.41704	2.61986	2.552	2.74597	2.42184	2.67974	2.36077	2.39338	2.38909	2.43078	2.45477	2.45936	2.70665	3.01596	1.88569	2.43362	2.56548	2.63859	2.79447	2.38231	632	0.818574	4	40;38;36;5	40	1	Immt	Isoform 2 of Mitochondrial inner membrane protein	IPI00381412;IPI00381413;IPI00875638	IPI00381412;IPI00381413;IPI00875638;IPI00555088	Q8CAQ8-2	>IPI:IPI00381412.1|SWISS-PROT:Q8CAQ8-2 Tax_Id=10090 Gene_Symbol=Immt Isoform 2 of Mitochondrial inner membrane protein;>IPI:IPI00381413.2|TREMBL:Q3TQL4;Q3TVZ5;Q3U7N2|ENSEMBL:ENSMUSP00000098859 Tax_Id=10090 Gene_Symbol=Immt Putative uncharacterized protein;
0.0998204	0.166254	0.131466	0.132721	0.0759129	0.0851789	0.0603609	0.0963762	0.0895897	0.117275	0.0723956	0.101999	0.516049	0.06744	0.0845952	0.116383	0.107891	0.106634	0.180047	0.0842318	0.0784621	0.0510334	0.103182	0.193173	633	0.560256	5	83;20;16;7;1	83	1	Flna	Isoform 1 of Filamin-A	IPI00131138	IPI00131138;IPI00886056;IPI00828712;IPI00387373;IPI00885984	Q8BTM8-1	>IPI:IPI00131138.10|SWISS-PROT:Q8BTM8-1 Tax_Id=10090 Gene_Symbol=Flna Isoform 1 of Filamin-A
2.57526	2.8473	3.18482	3.13726	3.17611	3.27247	3.33111	2.96718	3.45913	3.19683	2.89118	2.22722	2.29079	3.78	2.99419	2.73725	2.98507	3.75361	2.83768	2.66	3.17602	2.45038	2.94586	2.76144	634	0.879628	1	15	15	15	Sacm1l	Phosphatidylinositide phosphatase SAC1	IPI00109221	IPI00109221	Q9EP69	>IPI:IPI00109221.3|SWISS-PROT:Q9EP69|TREMBL:B0LAE6|ENSEMBL:ENSMUSP00000026270|REFSEQ:NP_109617 Tax_Id=10090 Gene_Symbol=Sacm1l Phosphatidylinositide phosphatase SAC1
0.171239	0.343713	0.313048	0.302179	0.213694	0.18557	0.193922	0.279018	0.194753	0.338891	0.131151	0.203687	0.643874	0.220751	0.243463	0.240593	0.258305	0.224427	0.228274	0.224391	0.154931	0.148111	0.220868	0.301332	635	0.425424	1	8	8	8	Itgb1	Integrin beta-1	IPI00132474	IPI00132474	P09055	>IPI:IPI00132474.3|SWISS-PROT:P09055|TREMBL:Q8BUD1|ENSEMBL:ENSMUSP00000087457|REFSEQ:NP_034708|VEGA:OTTMUSP00000046463 Tax_Id=10090 Gene_Symbol=Itgb1 Integrin beta-1
0.471587	0.739044	0.761383	0.909091	0.615006	0.693529	0.572935	0.733891	0.568796	0.675904	0.542505	0.591471	0.793399	0.56373	0.457247	0.535619	0.583737	0.813537	0.297947	0.533021	0.53984	0.529269	0.600348	0.574383	636	0.561145	1	10	10	8	Nmt1	Glycylpeptide N-tetradecanoyltransferase 1	IPI00224128	IPI00224128	O70310	>IPI:IPI00224128.7|SWISS-PROT:O70310|TREMBL:Q3UJC3|ENSEMBL:ENSMUSP00000021314|REFSEQ:NP_032733|VEGA:OTTMUSP00000003095 Tax_Id=10090 Gene_Symbol=Nmt1 Glycylpeptide N-tetradecanoyltransferase 1
0.402512	0.868056	0.739864	0.697447	0.446468	0.559003	0.478309	0.6222	0.543567	0.586304	0.597265	0.541859	0.873591	0.716178	0.518457	0.519886	0.537461	0.567247	0.353132	0.561514	0.53268	0.424701	0.512873	0.444524	637	0.221408	1	6	6	6	Mrpl12	39S ribosomal protein L12, mitochondrial	IPI00118963	IPI00118963	Q9DB15	>IPI:IPI00118963.1|SWISS-PROT:Q9DB15|ENSEMBL:ENSMUSP00000044417|REFSEQ:NP_081480|VEGA:OTTMUSP00000004660 Tax_Id=10090 Gene_Symbol=Mrpl12 39S ribosomal protein L12, mitochondrial
0.608643	1.04771	1.19752	1.23519	1.0201	1.01091	1.02943	1.11225	0.872296	1.10118	0.971817	0.837731	1.31994	0.850847	0.832639	1.07193	1.01571	1.28974	0.705268	0.90967	0.932314	0.811162	1.10844	1.12775	638	0.986579	1	6	6	6	Txndc5	Thioredoxin domain-containing protein 5	IPI00163011	IPI00163011	Q91W90	>IPI:IPI00163011.2|SWISS-PROT:Q91W90|TREMBL:Q3TEE8;Q3UBW8;Q3UWX1|ENSEMBL:ENSMUSP00000041839|REFSEQ:NP_663342 Tax_Id=10090 Gene_Symbol=Txndc5 Thioredoxin domain-containing protein 5
3.91942	3.84778	3.44649	0.994629	3.27107	3.18471	3.63121	3.36248	2.02943	1.36711	NaN	NaN	NaN	4.15852	3.24717	3.50422	NaN	3.23353	5.0971	NaN	NaN	3.48396	NaN	2.64564	639	0.265481	1	5	5	5	Dhrs1	Dehydrogenase/reductase SDR family member 1	IPI00331549	IPI00331549	Q99L04	>IPI:IPI00331549.1|SWISS-PROT:Q99L04|TREMBL:Q3TVU9|ENSEMBL:ENSMUSP00000002403|REFSEQ:NP_081095|VEGA:OTTMUSP00000034969 Tax_Id=10090 Gene_Symbol=Dhrs1 Dehydrogenase/reductase SDR family member 1
2.19954	NaN	3.54283	3.30077	NaN	3.575	3.10058	NaN	2.6629	3.28872	NaN	2.21112	3.26169	NaN	3.92588	3.16306	3.18482	NaN	NaN	3.73902	NaN	NaN	NaN	NaN	640	0.453201	1	5	5	5	Fam82a2	Regulator of microtubule dynamics protein 3	IPI00678532	IPI00678532	Q3UJU9	>IPI:IPI00678532.3|SWISS-PROT:Q3UJU9|ENSEMBL:ENSMUSP00000092283|REFSEQ:NP_001028308|VEGA:OTTMUSP00000016776 Tax_Id=10090 Gene_Symbol=Fam82a2 Regulator of microtubule dynamics protein 3
0.802311	1.61439	NaN	1.6837	1.35188	1.34584	1.39978	2.0372	1.2048	1.44741	1.41036	1.17379	2.08512	1.17534	1.14385	1.44452	1.70016	2.26501	1.27621	1.72319	1.46724	1.13019	1.65281	1.25342	641	0.6148	1	5	5	5	Ikbkap	Elongator complex protein 1	IPI00380780	IPI00380780	Q7TT37	>IPI:IPI00380780.7|SWISS-PROT:Q7TT37|TREMBL:Q3TD73|ENSEMBL:ENSMUSP00000030140|REFSEQ:NP_080355|VEGA:OTTMUSP00000007743 Tax_Id=10090 Gene_Symbol=Ikbkap Elongator complex protein 1
0.256292	0.636659	0.675721	0.791327	0.611471	0.660066	0.60154	0.738116	0.481278	0.639223	0.50477	0.526067	0.773216	0.546329	0.532708	0.60024	0.524631	0.629604	0.291562	0.466135	0.422101	0.400048	0.675356	0.618009	642	0.610586	1	4	4	4	Surf4	Surfeit locus protein 4	IPI00133249	IPI00133249	Q64310	>IPI:IPI00133249.1|SWISS-PROT:Q64310|TREMBL:Q3U7E6;Q545Q2|ENSEMBL:ENSMUSP00000015011|REFSEQ:NP_035642|VEGA:OTTMUSP00000012508 Tax_Id=10090 Gene_Symbol=Surf4 Surfeit locus protein 4
6.14817	6.12782	12.5777	7.60167	NaN	6.91946	9.68711	1.15087	6.30398	NaN	4.48029	4.67618	NaN	5.70614	NaN	7.12758	7.76458	6.62032	4.53412	6.3008	NaN	NaN	NaN	6.6507	643	0.669621	1	4	4	4	Tbc1d10b	TBC1 domain family member 10B	IPI00469012	IPI00469012	Q8BHL3	>IPI:IPI00469012.3|SWISS-PROT:Q8BHL3|ENSEMBL:ENSMUSP00000038318;ENSMUSP00000113307|REFSEQ:NP_653105|VEGA:OTTMUSP00000037617 Tax_Id=10090 Gene_Symbol=Tbc1d10b TBC1 domain family member 10B
NaN	1.82289	3.36678	NaN	NaN	6.46747	NaN	4.05039	3.15986	NaN	NaN	NaN	1.50002	NaN	NaN	NaN	1.37178	2.42348	NaN	3.88682	1.63143	NaN	2.96806	1.97922	644	0.205634	1	3	3	3	Slc38a3	Sodium-coupled neutral amino acid transporter 3	IPI00322156	IPI00322156	Q9DCP2	>IPI:IPI00322156.1|SWISS-PROT:Q9DCP2|ENSEMBL:ENSMUSP00000010208|REFSEQ:NP_076294 Tax_Id=10090 Gene_Symbol=Slc38a3 Sodium-coupled neutral amino acid transporter 3
0.644704	0.847458	0.953652	0.784437	0.915164	0.711541	0.726639	1.14286	0.793462	0.973994	0.703136	0.770594	1.14485	0.922935	0.811952	1.13629	0.821895	1.16419	0.807428	0.619886	0.833959	0.620887	0.829394	0.835003	645	0.502258	1	3	3	3	As3mt	Arsenite methyltransferase	IPI00515140	IPI00515140	Q91WU5	>IPI:IPI00515140.1|SWISS-PROT:Q91WU5|TREMBL:Q8CF08|ENSEMBL:ENSMUSP00000003655|REFSEQ:NP_065602 Tax_Id=10090 Gene_Symbol=As3mt Arsenite methyltransferase
0.936593	0.959509	0.937734	0.795039	0.877732	0.604741	0.64487	0.474293	0.940734	0.788022	0.583805	0.699643	0.49169	0.600132	0.79139	1.01547	0.776096	0.637064	0.809192	0.864379	0.579173	0.684978	0.789702	0.946163	646	0.347073	1	2	14	2	Actbl2	Beta-actin-like protein 2	IPI00221528	IPI00221528	Q8BFZ3	>IPI:IPI00221528.1|SWISS-PROT:Q8BFZ3|ENSEMBL:ENSMUSP00000052086|REFSEQ:NP_780706 Tax_Id=10090 Gene_Symbol=Actbl2 Beta-actin-like protein 2
1.46032	1.95683	2.10146	2.57612	1.9149	1.79973	1.88288	2.24775	1.6887	1.82512	1.63894	1.58876	2.15685	2.04788	1.91916	2.47219	2.40987	2.43297	1.29433	1.66522	1.90433	1.85206	2.0065	1.95921	647	0.536426	1	14	14	2	Prpsap2	Phosphoribosyl pyrophosphate synthase-associated protein 2	IPI00153950	IPI00153950	Q8R574	>IPI:IPI00153950.1|SWISS-PROT:Q8R574|TREMBL:Q5SWZ0;Q8BK37|ENSEMBL:ENSMUSP00000004955|REFSEQ:NP_001157714;NP_659055|VEGA:OTTMUSP00000006040 Tax_Id=10090 Gene_Symbol=Prpsap2 Phosphoribosyl pyrophosphate synthase-associated protein 2
8.90234	5.71135	4.39097	4.45573	7.73754	7.81738	5.9453	4.82137	5.58972	5.24081	8.59402	6.04778	2.08559	3.29946	6.47207	5.16156	3.75305	4.66897	8.34029	4.60554	8.33541	8.76885	8.19672	8.54117	648	0.0501299	8	16;15;15;14;13;9;5;3	16	16	Slc1a2	Isoform Glt-1 of Excitatory amino acid transporter 2	IPI00470184;IPI00875419;IPI00230289;IPI00749872;IPI00230290;IPI00751768	IPI00470184;IPI00875419;IPI00230289;IPI00749872;IPI00230290;IPI00751768;IPI00750430;IPI00755642	P43006-1	>IPI:IPI00470184.2|SWISS-PROT:P43006-1|TREMBL:Q3UYK6|ENSEMBL:ENSMUSP00000079100|REFSEQ:NP_001070982|VEGA:OTTMUSP00000015765 Tax_Id=10090 Gene_Symbol=Slc1a2 Isoform Glt-1 of Excitatory amino acid transporter 2;>IPI:IPI00875419.1|TREMBL:Q3USU5|ENSEMBL:ENSMUS
15.1387	NaN	NaN	2.64236	14.4592	NaN	7.73515	4.46947	18.5649	NaN	NaN	17.4219	3.36689	NaN	12.4836	11.5007	2.76335	3.77558	NaN	5.92171	NaN	33.4057	13.7472	NaN	649	0.147544	1	5	5	5	Prrt2	proline-rich transmembrane protein 2	IPI00281761	IPI00281761	D3Z7L6	>IPI:IPI00281761.3|TREMBL:D3Z7L6|ENSEMBL:ENSMUSP00000052727|REFSEQ:NP_001096033|VEGA:OTTMUSP00000044573 Tax_Id=10090 Gene_Symbol=Prrt2 proline-rich transmembrane protein 2
1.34824	2.23349	2.13543	2.22099	1.85636	2.14073	1.88672	2.17599	1.5082	2.10739	1.69082	1.69374	2.36972	2.15713	1.76697	2.00092	2.43309	2.21386	1.7515	1.99338	1.65854	1.73211	1.83932	1.54507	650	0.23407	2	9;9	9	9	Ptbp2	Isoform 2 of Polypyrimidine tract-binding protein 2	IPI00136002;IPI00751759	IPI00136002;IPI00751759	Q91Z31-2	>IPI:IPI00136002.1|SWISS-PROT:Q91Z31-2|TREMBL:Q3V328|ENSEMBL:ENSMUSP00000029780|REFSEQ:NP_062423 Tax_Id=10090 Gene_Symbol=Ptbp2 Isoform 2 of Polypyrimidine tract-binding protein 2;>IPI:IPI00751759.1|SWISS-PROT:Q91Z31-1 Tax_Id=10090 Gene_Symbol=Ptbp2 Isofor
0.27407	0.389909	0.560758	0.467727	0.274281	0.423191	0.37428	0.478103	0.449539	0.532652	0.462428	0.337564	0.523314	0.510595	0.484097	0.542594	0.323488	0.406355	0.331411	0.416406	0.445692	0.310039	0.367107	0.430478	651	0.207773	6	8;8;8;1;1;1	8	8	Caprin1	Caprin-1	IPI00757359;IPI00881332;IPI00121515	IPI00757359;IPI00881332;IPI00121515;IPI00876568;IPI00757442;IPI00757986	Q60865	>IPI:IPI00757359.1|SWISS-PROT:Q60865|TREMBL:Q3TEY4;Q3TTW8|ENSEMBL:ENSMUSP00000028607;ENSMUSP00000106777|REFSEQ:NP_001104759;NP_058019|VEGA:OTTMUSP00000015808;OTTMUSP00000015809 Tax_Id=10090 Gene_Symbol=Caprin1 Caprin-1;>IPI:IPI00881332.1|TREMBL:Q8CD82|REFS
3.81825	4.76985	3.43808	5.06714	5.56483	4.33971	6.73627	4.02609	4.3827	5.12006	4.80377	5.6744	4.04171	5.11326	6.20656	6.44413	4.81533	7.02592	5.04541	5.47915	4.67661	4.61489	6.40041	5.75242	652	0.385494	6	8;8;7;6;1;1	21	8	Eif4a2	Isoform 2 of Eukaryotic initiation factor 4A-II	IPI00409918;IPI00400432;IPI00857127;IPI00890863	IPI00409918;IPI00400432;IPI00857127;IPI00890863;IPI00857870;IPI00857990	P10630-2	>IPI:IPI00409918.1|SWISS-PROT:P10630-2|ENSEMBL:ENSMUSP00000110998|VEGA:OTTMUSP00000031670 Tax_Id=10090 Gene_Symbol=Eif4a2 Isoform 2 of Eukaryotic initiation factor 4A-II;>IPI:IPI00400432.2|SWISS-PROT:P10630-1|TREMBL:Q52KC1|ENSEMBL:ENSMUSP00000023599|REFSEQ
3.81112	6.76865	8.71991	6.48172	5.10751	6.38406	5.10386	NaN	NaN	5.66091	5.05714	3.97662	2.7225	6.27589	5.27955	6.65957	5.53189	6.74173	7.2469	4.85744	4.86405	4.37445	5.17224	4.67749	653	0.608778	2	7;7	7	7	Hip1r	Huntingtin-interacting protein 1-related protein	IPI00311726;IPI00876343	IPI00311726;IPI00876343	Q9JKY5	>IPI:IPI00311726.3|SWISS-PROT:Q9JKY5 Tax_Id=10090 Gene_Symbol=Hip1r Huntingtin-interacting protein 1-related protein;>IPI:IPI00876343.1|TREMBL:Q3UJ14;Q6P1F5;Q6ZQ77;Q80UP1;Q8BPA2;Q9D689|ENSEMBL:ENSMUSP00000000939|REFSEQ:NP_659507 Tax_Id=10090 Gene_Symbol=Hi
0.537172	0.861623	0.698129	1.14641	0.661463	0.713776	0.726164	0.895335	0.694203	0.84717	0.694011	0.670961	1.06364	0.747496	0.725847	0.822774	0.82802	0.790514	0.423245	0.804894	0.702445	0.659979	0.736052	0.74096	654	0.827462	5	7;7;7;6;3	7	6	Anp32a	Acidic leucine-rich nuclear phosphoprotein 32 family member A	IPI00314736;IPI00918207;IPI00918295;IPI00918185	IPI00314736;IPI00918207;IPI00918295;IPI00918185;IPI00468092	O35381	>IPI:IPI00314736.3|SWISS-PROT:O35381|ENSEMBL:ENSMUSP00000082652|REFSEQ:NP_033802|VEGA:OTTMUSP00000044957 Tax_Id=10090 Gene_Symbol=Anp32a Acidic leucine-rich nuclear phosphoprotein 32 family member A;>IPI:IPI00918207.1|TREMBL:D3Z7M9|ENSEMBL:ENSMUSP000001221
0.127275	0.259182	0.221626	0.270358	0.21468	0.202659	0.123908	0.273718	0.211162	0.210327	0.160591	0.156607	0.241185	0.11512	0.207607	0.161556	0.211577	0.411879	0.204851	0.233973	0.287621	0.206565	0.244588	0.24001	655	0.377879	5	6;6;4;4;3	6	6	Rpl13a;Flt3l		IPI00223217;IPI00462204;IPI00919200;IPI00654400;IPI00662196	IPI00223217;IPI00462204;IPI00919200;IPI00654400;IPI00662196	P19253	>IPI:IPI00223217.6|SWISS-PROT:P19253|TREMBL:Q5M9M0|ENSEMBL:ENSMUSP00000115722|REFSEQ:NP_033464|VEGA:OTTMUSP00000017768 Tax_Id=10090 Gene_Symbol=Rpl13a;Flt3l 60S ribosomal protein L13a;>IPI:IPI00462204.1|TREMBL:D3YY61|ENSEMBL:ENSMUSP00000071763|REFSEQ:XP_48
5.60884	6.48256	5.50752	3.07257	6.19118	6.86248	5.32396	5.90493	5.5919	4.75964	6.12482	6.01721	5.13611	6.55566	6.3008	7.47607	5.73756	6.58979	5.67988	6.95314	8.23316	5.55772	5.30448	6.73129	656	0.426289	4	5;5;3;3	5	5	Pfn2	Isoform 1 of Profilin-2	IPI00228645;IPI00845675;IPI00227805;IPI00881395	IPI00228645;IPI00845675;IPI00227805;IPI00881395	Q9JJV2-1	>IPI:IPI00228645.5|SWISS-PROT:Q9JJV2-1|ENSEMBL:ENSMUSP00000068890|REFSEQ:NP_062283|VEGA:OTTMUSP00000032976 Tax_Id=10090 Gene_Symbol=Pfn2 Isoform 1 of Profilin-2;>IPI:IPI00845675.1|SWISS-PROT:Q9JJV2-3|ENSEMBL:ENSMUSP00000112391;ENSMUSP00000113526|VEGA:OTTMU
1.82682	2.63852	3.28063	NaN	2.50313	2.78722	3.08033	3.20236	2.552	3.48177	2.01849	2.16342	3.26254	3.36236	3.36429	2.66382	3.09339	3.14317	1.26336	3.49321	2.66752	2.60125	3.081	2.63103	657	0.775723	2	5;5	5	5	Gsk3b	48 kDa protein	IPI00750061;IPI00125319	IPI00750061;IPI00125319	E9QAQ5;Q3TB31	>IPI:IPI00750061.1|ENSEMBL:ENSMUSP00000110398|VEGA:OTTMUSP00000017446 Tax_Id=10090 Gene_Symbol=Gsk3b 48 kDa protein;>IPI:IPI00125319.1|SWISS-PROT:Q9WV60|TREMBL:Q3TB31;Q5KU03|ENSEMBL:ENSMUSP00000023507|REFSEQ:NP_062801|VEGA:OTTMUSP00000017445 Tax_Id=10090 G
0.493705	0.77821	0.669389	0.672631	0.699692	0.585652	0.431798	0.572181	0.522057	0.540862	0.574812	0.531915	1.05582	0.570353	0.470256	0.573855	0.65505	0.622587	0.708717	0.532226	0.478011	0.391988	0.477259	0.576635	658	0.278704	5	4;4;4;3;1	4	4	Rsu1	Ras suppressor protein 1, isoform CRA_b	IPI00331321;IPI00555071;IPI00755220;IPI00652828	IPI00331321;IPI00555071;IPI00755220;IPI00652828;IPI00752339	Q9D031	>IPI:IPI00331321.1|TREMBL:Q9D031|ENSEMBL:ENSMUSP00000028059|REFSEQ:NP_033131|VEGA:OTTMUSP00000012055 Tax_Id=10090 Gene_Symbol=Rsu1 Ras suppressor protein 1, isoform CRA_b;>IPI:IPI00555071.2|SWISS-PROT:Q01730 Tax_Id=10090 Gene_Symbol=Rsu1 Ras suppressor pro
0.729501	1.43709	1.44421	2.05639	1.11787	1.27887	1.18028	1.8076	1.26236	1.61833	1.16003	1.01995	1.96541	1.69854	1.50121	1.46729	1.29968	1.51494	1.18528	1.19082	1.30511	1.02803	1.2951	1.18552	659	0.480956	2	4;4	4	4	Osbpl8	oxysterol-binding protein-like protein 8 isoform a	IPI00461290;IPI00461212	IPI00461290;IPI00461212	B9EJ86	>IPI:IPI00461290.1|TREMBL:B9EJ86|ENSEMBL:ENSMUSP00000100911|REFSEQ:NP_780698 Tax_Id=10090 Gene_Symbol=Osbpl8 oxysterol-binding protein-like protein 8 isoform a;>IPI:IPI00461212.1|TREMBL:Q69ZJ4|ENSEMBL:ENSMUSP00000047268;ENSMUSP00000092948|REFSEQ:NP_0010037
1.77138	2.1389	2.06667	3.29153	2.41249	2.85274	2.61049	2.74763	2.1645	3.18096	2.34527	2.02069	2.72941	3.15816	2.60342	2.80883	2.94976	2.83519	1.49934	2.66319	2.65343	2.32186	1.93397	1.8348	660	0.48169	5	6;5;5;5;5	7	4	Ppp2r5c	serine/threonine-protein phosphatase 2A 56 kDa regulatory subunit gamma isoform isoform d	IPI00408059;IPI00118131;IPI00457543;IPI00466617;IPI00408024	IPI00408059;IPI00118131;IPI00457543;IPI00466617;IPI00408024	Q6ZQK4	>IPI:IPI00408059.4|TREMBL:Q6ZQK4|ENSEMBL:ENSMUSP00000066351|REFSEQ:NP_001128473 Tax_Id=10090 Gene_Symbol=Ppp2r5c serine/threonine-protein phosphatase 2A 56 kDa regulatory subunit gamma isoform isoform d;>IPI:IPI00118131.6|SWISS-PROT:Q60996-1|ENSEMBL:ENSMUS
2.40854	3.44163	3.62476	4.33351	2.24276	3.67323	3.18847	2.54324	3.38501	3.87102	2.53299	2.67695	3.75446	4.14199	3.36519	3.76308	3.36338	1.65563	1.93382	2.8931	3.31411	2.98392	3.07323	2.99563	661	0.10241	3	7;1;1	7	4	Gmfb	Glia maturation factor, beta	IPI00467495	IPI00467495;IPI00857336;IPI00858319	Q9CQI3	>IPI:IPI00467495.4|SWISS-PROT:Q9CQI3|TREMBL:A7VJ98;Q80X87|ENSEMBL:ENSMUSP00000078293;ENSMUSP00000107448|REFSEQ:NP_071306|VEGA:OTTMUSP00000028260 Tax_Id=10090 Gene_Symbol=Gmfb Glia maturation factor, beta
4.07382	4.74473	4.82323	1.98283	4.095	6.38814	5.73361	6.19963	3.78472	5.09217	4.99675	4.31593	3.48833	4.31425	4.44109	3.82278	2.84665	5.5919	4.10256	1.34628	6.03573	5.0005	6.17246	5.32652	662	0.110979	2	26;25	32	2	Tln2	talin-2	IPI00229647;IPI00421218	IPI00229647;IPI00421218	B2RY15	>IPI:IPI00229647.5|TREMBL:B2RY15|ENSEMBL:ENSMUSP00000039633|REFSEQ:NP_001074711 Tax_Id=10090 Gene_Symbol=Tln2 talin-2;>IPI:IPI00421218.5|SWISS-PROT:Q71LX4|TREMBL:Q3TKJ2;Q3TN69|ENSEMBL:ENSMUSP00000041542 Tax_Id=10090 Gene_Symbol=Tln2 Talin-2
3.28138	NaN	3.6503	3.16706	4.1927	2.66503	0.90777	3.72259	3.1742	3.39397	3.575	5.88859	2.44093	1.90516	1.33917	2.48176	4.30422	2.13899	NaN	4.20627	3.44875	8.95175	4.16736	3.55429	663	0.119616	2	17;17	17	17	Bsn	Isoform 1 of Protein bassoon	IPI00134093;IPI00461199	IPI00134093;IPI00461199	O88737-1	>IPI:IPI00134093.4|SWISS-PROT:O88737-1|TREMBL:Q3TUN1;Q3UXD6|ENSEMBL:ENSMUSP00000035208|REFSEQ:NP_031593|VEGA:OTTMUSP00000018359 Tax_Id=10090 Gene_Symbol=Bsn Isoform 1 of Protein bassoon;>IPI:IPI00461199.2|SWISS-PROT:O88737-2 Tax_Id=10090 Gene_Symbol=Bsn Is
2.39831	2.44612	2.93513	3.27482	2.8748	3.30273	3.33133	2.82303	3.19662	3.33645	2.93169	3.20174	2.80167	2.66645	2.77878	3.43678	2.78466	3.56443	2.99383	2.77331	2.92047	2.73808	3.18096	3.0809	664	0.490994	8	20;10;8;1;1;1;1;1	20	16	Mapk1	Mitogen-ac	IPI00119663;IPI00474243	IPI00119663;IPI00474243;IPI00830966;IPI00122366;IPI00453690;IPI00273726;IPI00405984;IPI00918556	P63085	>IPI:IPI00119663.3|SWISS-PROT:P63085|TREMBL:Q3UF82;Q922X7|ENSEMBL:ENSMUSP00000023462;ENSMUSP00000065983;ENSMUSP00000111396|REFSEQ:NP_001033752;NP_036079|VEGA:OTTMUSP00000021888;OTTMUSP00000022009;OTTMUSP00000022010 Tax_Id=10090 Gene_Symbol=Mapk1 Mitogen-ac
4.48893	5.02765	4.85555	5.34702	5.06124	6.97691	5.27065	6.58718	5.29185	5.63349	4.27936	5.10282	2.10984	4.7576	5.06329	5.42211	5.37982	5.86855	4.5608	5.56514	6.4658	5.80316	5.54908	5.72803	665	0.167526	5	19;19;4;3;3	19	16	Clasp2	CLIP-associating protein 2 c	IPI00407863;IPI00830860	IPI00407863;IPI00830860;IPI00654284;IPI00119157;IPI00875254	Q8BRT1-1	>IPI:IPI00407863.6|SWISS-PROT:Q8BRT1-1|TREMBL:B9EJA4;Q08EB5|ENSEMBL:ENSMUSP00000107469|REFSEQ:NP_001107819 Tax_Id=10090 Gene_Symbol=Clasp2 CLIP-associating protein 2 c;>IPI:IPI00830860.1|TREMBL:A2RRR3;Q08EB6|ENSEMBL:ENSMUSP00000035089|REFSEQ:NP_001075429 T
0.664363	1.00453	1.09995	1.33681	0.925155	1.07615	1.01185	1.19148	0.954472	0.909256	1.02252	0.713929	1.53643	1.09029	0.954563	1.0765	1.05467	1.06611	0.802568	0.916087	0.860733	0.79321	0.907194	0.893655	666	0.266933	3	13;13;13	13	13	Csde1	MKIAA0885 protein (Fragment)	IPI00338717;IPI00274747;IPI00938510	IPI00338717;IPI00274747;IPI00938510	Q80TP8	>IPI:IPI00338717.3|TREMBL:Q80TP8|ENSEMBL:ENSMUSP00000071834 Tax_Id=10090 Gene_Symbol=Csde1 MKIAA0885 protein (Fragment);>IPI:IPI00274747.6|SWISS-PROT:Q91W50|TREMBL:Q3TXH7;Q3U1S6;Q3U4S7|ENSEMBL:ENSMUSP00000029446|REFSEQ:NP_659150 Tax_Id=10090 Gene_Symbol=Cs
0.677644	0.937559	1.06689	1.20372	0.88739	0.980777	0.960892	1.0561	0.855286	0.904404	0.832224	0.722074	1.0222	1.02409	0.925498	0.976753	1.03973	0.911162	0.757691	0.940734	0.861326	0.744048	0.955658	0.783883	667	0.296082	2	10;10	10	10	Psma2	Proteasome subunit alpha type	IPI00420745;IPI00890001	IPI00420745;IPI00890001	Q3UWT6;Q6ZWV8;Q8BKE0;Q9CZ58	>IPI:IPI00420745.7|TREMBL:Q3UWT6;Q6ZWV8;Q8BKE0;Q9CZ58|ENSEMBL:ENSMUSP00000106140|REFSEQ:NP_032970 Tax_Id=10090 Gene_Symbol=Psma2 Proteasome subunit alpha type;>IPI:IPI00890001.1|SWISS-PROT:P49722 Tax_Id=10090 Gene_Symbol=Psma2 Proteasome subunit alpha type
NaN	NaN	NaN	4.5958	4.32246	3.2353	3.65417	4.00737	1.46927	NaN	NaN	NaN	2.57473	1.91597	2.13904	4.16563	NaN	6.11883	NaN	NaN	NaN	3.28332	NaN	NaN	668	0.0796786	6	6;6;6;6;2;1	6	1	Stx16	Syntaxin-16	IPI00621076;IPI00857949;IPI00857890;IPI00225880	IPI00621076;IPI00857949;IPI00857890;IPI00225880;IPI00918526;IPI00918352	Q8BVI5	>IPI:IPI00621076.2|SWISS-PROT:Q8BVI5|TREMBL:A2ACM7|ENSEMBL:ENSMUSP00000085218;ENSMUSP00000091836|REFSEQ:NP_766263|VEGA:OTTMUSP00000017603 Tax_Id=10090 Gene_Symbol=Stx16 Syntaxin-16;>IPI:IPI00857949.2|REFSEQ:NP_001095893 Tax_Id=10090 Gene_Symbol=Stx16 synta
0.323761	0.651508	0.680828	0.849401	0.645411	0.566893	0.645245	0.831117	0.539578	0.564972	0.558067	0.528709	0.786596	0.541594	0.455498	0.727379	0.637349	0.674172	0.336678	0.633152	0.511483	0.400962	0.477076	0.5251	669	0.555569	6	3;3;1;1;1;1	3	1	Smad2	Isoform Long of Mothers against decapentaplegic homolog 2	IPI00556692;IPI00458087	IPI00556692;IPI00458087;IPI00310561;IPI00831542;IPI00808484;IPI00830220	Q62432-1	>IPI:IPI00556692.2|SWISS-PROT:Q62432-1|ENSEMBL:ENSMUSP00000025453|REFSEQ:NP_034884 Tax_Id=10090 Gene_Symbol=Smad2 Isoform Long of Mothers against decapentaplegic homolog 2;>IPI:IPI00458087.2|SWISS-PROT:Q62432-2|TREMBL:Q8C2P1|ENSEMBL:ENSMUSP00000089439 Tax_
3.04034	0.395116	2.38834	3.78888	3.06636	1.99748	1.83952	1.20334	3.08328	3.26968	4.98405	3.18674	2.68774	3.42853	3.3987	2.2239	0.616713	1.4425	3.73944	1.96545	2.03459	2.2779	2.94377	2.06386	670	0.364687	2	12;9	12	1	Bcan	brevican core protein isoform 1	IPI00869394;IPI00652893	IPI00869394;IPI00652893	Q3TQE9;Q80WT7	>IPI:IPI00869394.1|TREMBL:Q3TQE9;Q80WT7|ENSEMBL:ENSMUSP00000088491;ENSMUSP00000103199|REFSEQ:NP_031555 Tax_Id=10090 Gene_Symbol=Bcan brevican core protein isoform 1;>IPI:IPI00652893.2|TREMBL:Q3TSQ8|REFSEQ:NP_001103228 Tax_Id=10090 Gene_Symbol=Bcan brevican
0.173479	0.292355	0.300535	0.407166	0.22702	0.228337	0.199179	0.299688	0.225469	0.263964	0.212495	0.224477	0.293006	0.209271	0.217917	0.247997	0.289285	0.279392	0.205427	0.279595	0.200325	0.173977	0.202774	0.254149	671	0.370845	1	24	24	24	Hnrnpu	Heterogeneous nuclear ribonucleoprotein U	IPI00458583	IPI00458583	Q8VEK3	>IPI:IPI00458583.3|SWISS-PROT:Q8VEK3|TREMBL:O88568;Q3TGN5;Q3TS50;Q3TVV6;Q3TWN5;Q3TXW2;Q3ULH5;Q8C290;Q9R205|ENSEMBL:ENSMUSP00000047571|REFSEQ:NP_058085|VEGA:OTTMUSP00000024527 Tax_Id=10090 Gene_Symbol=Hnrnpu Heterogeneous nuclear ribonucleoprotein U
0.671051	1.10333	1.15762	1.25185	0.918949	0.931966	0.903751	1.03799	0.910913	1.06224	0.872372	0.864753	1.26828	1.11356	0.882924	0.904977	1.05559	0.969744	0.667601	0.913075	0.894214	0.833125	0.923446	0.865876	672	0.659066	1	13	13	13	Dnaja2	DnaJ homolog subfamily A member 2	IPI00136251	IPI00136251	Q9QYJ0	>IPI:IPI00136251.1|SWISS-PROT:Q9QYJ0|TREMBL:Q3TFF0|ENSEMBL:ENSMUSP00000034138|REFSEQ:NP_062768 Tax_Id=10090 Gene_Symbol=Dnaja2 DnaJ homolog subfamily A member 2
1.01414	1.22636	1.43627	1.88925	1.41794	1.43571	1.30012	1.54674	1.21112	1.41645	1.33572	1.27639	1.58609	1.49434	1.3744	1.51856	1.60362	1.5613	1.32221	1.34557	1.44117	1.20176	1.41866	1.30605	673	0.673739	1	10	10	9	Vapa	Vesicle-associated membrane protein-associated protein A	IPI00125267	IPI00125267	Q9WV55	>IPI:IPI00125267.4|SWISS-PROT:Q9WV55|ENSEMBL:ENSMUSP00000024897|REFSEQ:NP_038961 Tax_Id=10090 Gene_Symbol=Vapa Vesicle-associated membrane protein-associated protein A
2.06309	3.05773	3.34504	2.81365	3.03601	2.93824	1.02323	1.27933	2.30856	1.98476	2.08917	1.63015	1.6556	1.81508	2.3951	2.88043	3.48032	4.11811	3.07323	2.33024	2.8967	2.86525	2.78094	3.02279	674	0.0775865	1	5	5	5	Timm9	Mitochondrial import inner membrane translocase subunit Tim9	IPI00125513	IPI00125513	Q9WV98	>IPI:IPI00125513.1|SWISS-PROT:Q9WV98|ENSEMBL:ENSMUSP00000021486|REFSEQ:NP_001020024;NP_001020025;NP_038924 Tax_Id=10090 Gene_Symbol=Timm9 Mitochondrial import inner membrane translocase subunit Tim9
0.683107	0.733568	1.24502	1.33797	0.885818	0.850702	0.755744	1.62256	0.970403	1.12549	0.891822	0.904977	1.1616	1.10793	1.05269	1.14822	1.1612	1.15806	0.689941	0.94402	0.808734	0.965065	0.903587	0.898715	675	0.839732	1	5	5	5	Fkbp2	Peptidyl-prolyl cis-trans isomerase FKBP2	IPI00133948	IPI00133948	P45878	>IPI:IPI00133948.1|SWISS-PROT:P45878|TREMBL:Q3TND1;Q3UND3|ENSEMBL:ENSMUSP00000066839|REFSEQ:NP_001159840;NP_032046 Tax_Id=10090 Gene_Symbol=Fkbp2 Peptidyl-prolyl cis-trans isomerase FKBP2
0.643915	1.0898	1.01378	1.01516	0.757978	0.897586	0.690608	0.871916	0.926956	0.925669	0.682314	0.776217	1.11364	0.831186	1.0167	1.20301	1.09853	0.97012	0.690608	1.01577	0.810701	0.610426	0.976562	0.900171	676	0.354124	1	4	4	3	Tceb1;LOC100045866		IPI00323130	IPI00323130	P83940	>IPI:IPI00323130.3|SWISS-PROT:P83940|ENSEMBL:ENSMUSP00000111009|REFSEQ:NP_080732;XP_001475387 Tax_Id=10090 Gene_Symbol=Tceb1;LOC100045866 Transcription elongation factor B polypeptide 1
0.774833	0.813868	1.01255	1.21084	1.10009	0.943218	0.705418	0.862143	0.678334	NaN	NaN	NaN	1.96757	1.15424	0.751654	1.02064	0.707914	NaN	NaN	0.646538	0.867378	0.479547	1.0443	0.75815	677	0.226	1	2	2	2	Arih1	Protein ariadne-1 homolog	IPI00130236	IPI00130236	Q9Z1K5	>IPI:IPI00130236.4|SWISS-PROT:Q9Z1K5|TREMBL:Q8C2W9;Q8CFJ4|ENSEMBL:ENSMUSP00000026264|REFSEQ:NP_064311 Tax_Id=10090 Gene_Symbol=Arih1 Protein ariadne-1 homolog
25.6772	8.53315	6.70601	4.38116	4.85814	5.11378	6.46831	NaN	2.61178	4.05828	7.76337	7.43605	NaN	12.9772	NaN	6.391	8.44238	9.7924	9.55658	4.87234	9.5347	9.23531	5.59284	7.85361	678	0.431647	1	2	7	2	Rap2b	Ras-related protein Rap-2b	IPI00138716	IPI00138716	P61226	>IPI:IPI00138716.1|SWISS-PROT:P61226|TREMBL:Q6ZWR0|ENSEMBL:ENSMUSP00000038841|REFSEQ:NP_082988 Tax_Id=10090 Gene_Symbol=Rap2b Ras-related protein Rap-2b
0.226055	0.296709	0.285331	0.374925	0.248589	0.282622	0.237784	0.360503	0.272361	0.303334	0.248404	0.233133	0.38549	0.24728	0.256673	0.279806	0.252742	0.353882	0.225043	0.253396	0.241645	0.199322	0.298365	0.289109	679	0.883927	1	13	13	2	Calu	Calumenin	IPI00135186	IPI00135186	O35887	>IPI:IPI00135186.1|SWISS-PROT:O35887|TREMBL:Q3TQD1;Q3TUF3;Q3UG11|ENSEMBL:ENSMUSP00000031779|REFSEQ:NP_031620|VEGA:OTTMUSP00000026076 Tax_Id=10090 Gene_Symbol=Calu Calumenin
20.9222	6.16903	10.9218	2.78614	6.56944	5.52059	5.4484	NaN	4.25804	5.43272	1.94955	2.88867	12.3267	16.8756	13.9227	20.4491	8.57192	12.1082	4.32826	4.65701	12.5929	19.1314	29.2355	2.17278	680	0.0735342	10	9;9;8;8;3;3;3;2;1;1	9	9	Kcnab2	Voltage-gated potassium channel subunit beta-2	IPI00315359;IPI00928106;IPI00928150;IPI00928524	IPI00315359;IPI00928106;IPI00928150;IPI00928524;IPI00133817;IPI00876478;IPI00314109;IPI00928388;IPI00928343;IPI00927988	P62482	>IPI:IPI00315359.1|SWISS-PROT:P62482|TREMBL:Q3U7L1|ENSEMBL:ENSMUSP00000030768;ENSMUSP00000101273|REFSEQ:NP_034728|VEGA:OTTMUSP00000045982;OTTMUSP00000045983 Tax_Id=10090 Gene_Symbol=Kcnab2 Voltage-gated potassium channel subunit beta-2;>IPI:IPI00928106.1|T
2.25566	2.80081	3.02581	3.01905	1.05755	NaN	3.49052	3.41752	4.41657	4.29074	NaN	3.72342	4.21124	7.24796	4.07349	5.00375	1.75833	2.98187	1.11396	5.0692	NaN	4.1542	3.15996	NaN	681	0.141924	11	9;8;2;2;2;2;2;2;2;2;1	9	9	Git1	ARF GTPase-activating protein GIT1	IPI00470095;IPI00649373	IPI00470095;IPI00649373;IPI00752500;IPI00956854;IPI00124597;IPI00757111;IPI00225262;IPI00753048;IPI00653482;IPI00875648;IPI00749678	Q68FF6	>IPI:IPI00470095.1|SWISS-PROT:Q68FF6|ENSEMBL:ENSMUSP00000037210|REFSEQ:NP_001004144|VEGA:OTTMUSP00000008532 Tax_Id=10090 Gene_Symbol=Git1 ARF GTPase-activating protein GIT1;>IPI:IPI00649373.1|TREMBL:Q3V322;Q5F258|ENSEMBL:ENSMUSP00000098375|VEGA:OTTMUSP0000
5.63222	2.92869	1.0697	NaN	4.0843	7.5358	10.2316	3.0597	4.84332	6.68673	2.98998	2.98071	3.69426	2.28891	12.6403	4.79042	2.54233	4.13873	3.15119	1.9545	10.1016	9.91179	6.7714	8.42106	682	0.059662	2	8;1	8	8	Gdap1	Isoform 1 of Ganglioside-induced differentiation-associated protein 1	IPI00134137	IPI00134137;IPI00387592	O88741-1	>IPI:IPI00134137.1|SWISS-PROT:O88741-1|TREMBL:Q3UEX4;Q3UTV3|ENSEMBL:ENSMUSP00000026879|REFSEQ:NP_034397|VEGA:OTTMUSP00000025245 Tax_Id=10090 Gene_Symbol=Gdap1 Isoform 1 of Ganglioside-induced differentiation-associated protein 1
1.86546	NaN	1.25851	NaN	4.11117	2.83214	2.83126	4.25224	NaN	NaN	1.25442	NaN	NaN	NaN	1.64382	NaN	2.95911	4.29461	1.46819	2.5257	NaN	3.16516	NaN	NaN	683	0.0801184	5	7;7;6;5;5	7	7	Gripap1	Gripap1 protein	IPI00775775;IPI00775865;IPI00267855;IPI00654416;IPI00775979	IPI00775775;IPI00775865;IPI00267855;IPI00654416;IPI00775979	A2AEW8	>IPI:IPI00775775.1|TREMBL:A2AEW8|ENSEMBL:ENSMUSP00000111339|VEGA:OTTMUSP00000019477 Tax_Id=10090 Gene_Symbol=Gripap1 Gripap1 protein;>IPI:IPI00775865.1|TREMBL:A2AEW9|ENSEMBL:ENSMUSP00000099218|VEGA:OTTMUSP00000019479 Tax_Id=10090 Gene_Symbol=Gripap1 GRIP1
NaN	1.46931	1.43943	4.914	3.88395	5.4019	NaN	NaN	NaN	NaN	NaN	NaN	2.65555	12.0859	6.33513	6.41314	3.08537	3.09205	8.81135	NaN	NaN	1.9878	NaN	NaN	684	0.254216	9	7;7;7;7;7;7;7;7;4	7	5	Ptprd	214 kDa protein	IPI00608063;IPI00462846;IPI00876285;IPI00551337;IPI00875798;IPI00465836;IPI00462847;IPI00556869;IPI00621145	IPI00608063;IPI00462846;IPI00876285;IPI00551337;IPI00875798;IPI00465836;IPI00462847;IPI00556869;IPI00621145	E9Q7I7;G3UX75;Q3UUC2	>IPI:IPI00608063.3|ENSEMBL:ENSMUSP00000058466;ENSMUSP00000102910|VEGA:OTTMUSP00000000345 Tax_Id=10090 Gene_Symbol=Ptprd 214 kDa protein;>IPI:IPI00462846.3|SWISS-PROT:Q64487-1 Tax_Id=10090 Gene_Symbol=Ptprd Isoform C of Receptor-type tyrosine-protein phosph
1.58065	NaN	NaN	4.75987	0.970685	6.07054	6.82221	NaN	NaN	NaN	NaN	NaN	8.19538	3.77772	2.46907	2.93229	2.5601	NaN	5.61766	4.28816	2.79244	3.99297	3.94244	4.64296	685	0.96599	2	4;4	4	4	Nipsnap3b	Protein NipSnap homolog 3A	IPI00132444;IPI00648829	IPI00132444;IPI00648829	Q9CQE1	>IPI:IPI00132444.1|SWISS-PROT:Q9CQE1|TREMBL:B1AWZ4|ENSEMBL:ENSMUSP00000015391|REFSEQ:NP_079899|VEGA:OTTMUSP00000007565 Tax_Id=10090 Gene_Symbol=Nipsnap3b Protein NipSnap homolog 3A;>IPI:IPI00648829.1|TREMBL:B1AWZ5|ENSEMBL:ENSMUSP00000103292|VEGA:OTTMUSP000
0.0872448	0.162101	0.271828	NaN	0.119029	0.064512	0.10822	0.120976	0.49965	0.411709	0.344709	0.870474	NaN	0.0854774	0.140588	0.0780214	0.0741675	0.079466	1.34935	0.0874355	NaN	0.160418	0.0783085	NaN	686	0.0807586	1	9	9	9	Mcm5	DNA replication licensing factor MCM5	IPI00309398	IPI00309398	P49718	>IPI:IPI00309398.6|SWISS-PROT:P49718|TREMBL:Q52KC3;Q8BQ03;Q8C2I9|ENSEMBL:ENSMUSP00000005545|REFSEQ:NP_032592 Tax_Id=10090 Gene_Symbol=Mcm5 DNA replication licensing factor MCM5
6.07054	8.06062	5.46179	2.23194	8.63259	NaN	3.36372	1.32859	12.0552	5.27621	NaN	NaN	3.73148	4.04367	10.706	6.81477	1.75923	3.45829	1.30792	NaN	12.3946	5.30476	NaN	5.81903	687	0.126422	1	8	8	8	Pacs1	Phosphofurin acidic cluster sorting protein 1	IPI00321922	IPI00321922	Q8K212	>IPI:IPI00321922.2|SWISS-PROT:Q8K212|TREMBL:Q3TAB8;Q3TP27|ENSEMBL:ENSMUSP00000025786|REFSEQ:NP_694769 Tax_Id=10090 Gene_Symbol=Pacs1 Phosphofurin acidic cluster sorting protein 1
0.480077	2.2818	NaN	1.09398	0.911743	2.36759	2.21872	4.00882	0.134746	0.352896	0.188548	0.318046	2.49171	3.05642	0.319499	2.39791	2.99419	0.285886	0.463628	0.118706	2.48447	0.0880437	2.06671	0.35158	688	0.0884977	1	7	7	7	Mthfd2	Bifunctional methylenetetrahydrofolate dehydrogenase/cyclohydrolase, mitochondrial	IPI00109824	IPI00109824	P18155	>IPI:IPI00109824.1|SWISS-PROT:P18155|TREMBL:Q3U8E7|ENSEMBL:ENSMUSP00000005810|REFSEQ:NP_032664|VEGA:OTTMUSP00000026807 Tax_Id=10090 Gene_Symbol=Mthfd2 Bifunctional methylenetetrahydrofolate dehydrogenase/cyclohydrolase, mitochondrial
3.84098	4.1561	4.45414	2.75353	NaN	NaN	NaN	NaN	3.06852	6.86577	NaN	2.1857	4.27369	NaN	NaN	4.41482	NaN	NaN	NaN	NaN	6.7981	5.05025	8.56531	8.07233	689	0.0769863	1	2	2	2	0610011F06Rik	UPF0585 protein C16orf13 homolog	IPI00121271	IPI00121271	Q9DCS2	>IPI:IPI00121271.1|SWISS-PROT:Q9DCS2|ENSEMBL:ENSMUSP00000026827|REFSEQ:NP_080962 Tax_Id=10090 Gene_Symbol=0610011F06Rik UPF0585 protein C16orf13 homolog
0.839701	2.26989	0.243932	2.94681	8.07298	5.84522	2.50094	0.599952	2.99536	4.59263	3.1082	3.21265	0.590388	1.89566	2.80418	3.55139	1.45393	6.35971	3.79824	3.74097	7.62427	3.82805	2.76847	6.83574	690	0.170796	9	9;9;8;8;7;4;4;2;2	9	9	Vcan	versican core protein isoform 1	IPI00875672;IPI00469565;IPI00121038;IPI00469172;IPI00230441	IPI00875672;IPI00469565;IPI00121038;IPI00469172;IPI00230441;IPI00473932;IPI00656277;IPI00918257;IPI00918250	E0CZC0;E9PYH0;Q3TNR6;Q3UXS4	>IPI:IPI00875672.1|ENSEMBL:ENSMUSP00000105173|REFSEQ:NP_001074718|VEGA:OTTMUSP00000045468 Tax_Id=10090 Gene_Symbol=Vcan versican core protein isoform 1;>IPI:IPI00469565.3|SWISS-PROT:Q62059-3|TREMBL:Q05CR7;Q3TNR6;Q3TQ47;Q3UXS4|ENSEMBL:ENSMUSP00000105171|REF
4.29387	2.06067	NaN	1.30873	NaN	NaN	4.66919	NaN	2.70351	NaN	NaN	NaN	2.63414	3.94571	NaN	5.7425	0.596481	NaN	NaN	1.0528	6.71637	0.547885	1.69509	NaN	691	0.257321	5	9;9;3;3;2	9	9	Nf1	Isoform 2 of Neurofibromin	IPI00108783;IPI00223398	IPI00108783;IPI00223398;IPI00223399;IPI00223400;IPI00649393	Q04690-1	>IPI:IPI00108783.1|SWISS-PROT:Q04690-1|TREMBL:B1AQE7|ENSEMBL:ENSMUSP00000071289|REFSEQ:NP_035027|VEGA:OTTMUSP00000000223 Tax_Id=10090 Gene_Symbol=Nf1 Isoform 2 of Neurofibromin;>IPI:IPI00223398.1|SWISS-PROT:Q04690-2|TREMBL:B1AQE8;Q3TYD2;Q8CCE8|ENSEMBL:ENSM
0.162885	0.117095	0.111377	0.155048	NaN	0.21317	0.105915	NaN	0.201751	0.168022	0.144991	0.219804	0.766989	0.0802375	0.230112	0.311071	0.0880902	0.168466	0.151605	0.266241	0.0813074	0.0508156	0.093712	0.234412	692	0.295335	4	9;8;8;6	9	9	Nasp	nuclear autoantigenic sperm protein isoform 2	IPI00830976;IPI00130959;IPI00115987;IPI00136708	IPI00830976;IPI00130959;IPI00115987;IPI00136708	B1AU75;Q3TTH5	>IPI:IPI00830976.1|TREMBL:B1AU75;Q3TTH5|ENSEMBL:ENSMUSP00000030456|REFSEQ:NP_058057|VEGA:OTTMUSP00000009823 Tax_Id=10090 Gene_Symbol=Nasp nuclear autoantigenic sperm protein isoform 2;>IPI:IPI00130959.5|SWISS-PROT:Q99MD9-1|REFSEQ:XP_001472858 Tax_Id=10090
3.50287	1.88505	1.25128	0.190176	2.06079	1.51423	3.06176	2.60085	4.7288	5.08932	2.66631	3.38123	0.435692	2.12445	1.483	1.19798	0.824878	3.46512	5.87165	0.541506	2.48521	NaN	2.28415	2.27164	693	0.264406	5	10;9;7;2;1	10	9	Serpinb1a; Serpin1	Leukocyte elastase inhibitor A	IPI00457659;IPI00830167;IPI00515459	IPI00457659;IPI00830167;IPI00515459;IPI00475110;IPI00322608	Q9D154	>IPI:IPI00457659.2|SWISS-PROT:Q9D154|TREMBL:Q8BK60|ENSEMBL:ENSMUSP00000075690|REFSEQ:NP_079705 Tax_Id=10090 Gene_Symbol=Serpinb1a Leukocyte elastase inhibitor A;>IPI:IPI00830167.1|TREMBL:D3YUB0|ENSEMBL:ENSMUSP00000021833 Tax_Id=10090 Gene_Symbol=Serpinb1a
NaN	1.68107	5.6912	3.85966	13.0368	3.94555	NaN	10.541	4.14267	2.18336	7.37898	3.82365	2.30266	4.76077	NaN	3.76067	4.1088	4.73956	NaN	6.13271	NaN	NaN	NaN	5.36337	694	0.229271	2	10;9	24	9	Hspa2	heat shock-related 70 kDa protein 2	IPI00387494;IPI00331546	IPI00387494;IPI00331546	B7U582;Q99KD7	>IPI:IPI00387494.1|TREMBL:B7U582;Q99KD7|ENSEMBL:ENSMUSP00000079306;ENSMUSP00000106034|REFSEQ:NP_001002012;NP_032327 Tax_Id=10090 Gene_Symbol=Hspa2 heat shock-related 70 kDa protein 2;>IPI:IPI00331546.2|SWISS-PROT:P17156 Tax_Id=10090 Gene_Symbol=Hspa2 Heat
1.13058	1.72108	1.53941	4.45355	3.13627	3.34213	3.86757	4.46428	1.70975	3.31543	2.52685	2.5666	2.34489	3.27418	2.07987	3.0791	2.30654	3.35345	1.78056	1.41679	2.02306	1.95293	2.00084	2.33956	695	0.11153	4	9;5;3;3	10	9	Afg3l2	AFG3-like protein 2	IPI00170357;IPI00850215	IPI00170357;IPI00850215;IPI00468514;IPI00652659	Q8JZQ2	>IPI:IPI00170357.5|SWISS-PROT:Q8JZQ2|TREMBL:Q3U7C0;Q3UDQ7;Q8R5F1;Q9D736|ENSEMBL:ENSMUSP00000025408|REFSEQ:NP_081406 Tax_Id=10090 Gene_Symbol=Afg3l2 AFG3-like protein 2;>IPI:IPI00850215.1|REFSEQ:XP_001472434 Tax_Id=10090 Gene_Symbol=LOC100048880 similar to
1.29988	3.99122	3.59738	2.92809	4.4238	3.67931	5.04745	2.01955	NaN	1.39098	2.13029	1.6541	2.53852	2.62467	1.70048	4.55519	1.88501	3.52746	NaN	2.37242	4.87092	3.09014	NaN	NaN	696	0.219585	8	9;2;2;2;2;2;2;2	9	9	Gsta4	Glutathione S-transferase A4	IPI00323911	IPI00323911;IPI00420436;IPI00554953;IPI00116055;IPI00886210;IPI00331241;IPI00850134;IPI00849624	P24472	>IPI:IPI00323911.3|SWISS-PROT:P24472|ENSEMBL:ENSMUSP00000034903|REFSEQ:NP_034487 Tax_Id=10090 Gene_Symbol=Gsta4 Glutathione S-transferase A4
3.78659	1.65063	2.89034	1.45934	4.39792	4.68911	4.36796	3.7048	3.96102	4.68801	4.71787	5.06868	2.33057	2.59572	4.9838	2.79244	1.61394	4.52714	4.55021	2.23	3.37018	3.17098	3.9398	3.58719	697	0.0589988	3	8;8;8	8	8	Mtch1	Isoform 1 of Mitochondrial carrier homolog 1	IPI00137173;IPI00757186;IPI00742287	IPI00137173;IPI00757186;IPI00742287	Q791T5-1	>IPI:IPI00137173.1|SWISS-PROT:Q791T5-1|ENSEMBL:ENSMUSP00000093077|REFSEQ:NP_063933|VEGA:OTTMUSP00000036870 Tax_Id=10090 Gene_Symbol=Mtch1 Isoform 1 of Mitochondrial carrier homolog 1;>IPI:IPI00757186.1|TREMBL:D3YXC2;Q8CEY5|ENSEMBL:ENSMUSP00000110341;ENSMUS
NaN	4.52591	4.5255	5.85892	14.7306	41.2303	15.7235	2.55024	4.80515	5.71037	5.01781	6.43956	1.28971	2.51731	7.98531	10.8405	4.58821	19.0335	NaN	9.48227	5.67988	2.62371	5.91541	32.3091	698	0.485937	8	8;8;6;6;6;4;2;2	8	8	5730469M10Rik;Fam213a	Putative uncharacterized protein	IPI00880610;IPI00187272;IPI00880502;IPI00882290;IPI00882173;IPI00880354	IPI00880610;IPI00187272;IPI00880502;IPI00882290;IPI00882173;IPI00880354;IPI00882022;IPI00880211	Q3U125	>IPI:IPI00880610.1|TREMBL:Q3U125|ENSEMBL:ENSMUSP00000112377;ENSMUSP00000117278|VEGA:OTTMUSP00000035150;OTTMUSP00000035157 Tax_Id=10090 Gene_Symbol=5730469M10Rik Putative uncharacterized protein;>IPI:IPI00187272.3|SWISS-PROT:Q9CYH2|ENSEMBL:ENSMUSP0000002231
0.666001	NaN	NaN	1.35731	NaN	NaN	0.987167	1.31129	1.77803	NaN	NaN	NaN	2.3428	5.33817	10.3554	7.85793	NaN	4.59834	NaN	1.44473	7.80396	NaN	0.91191	NaN	699	0.166288	4	8;8;4;2	8	8	6430548M08Rik;Kiaa0513	Uncharacterized protein KIAA0513	IPI00377731;IPI00857896;IPI00856535	IPI00377731;IPI00857896;IPI00856535;IPI00856400	Q8R0A7	>IPI:IPI00377731.2|SWISS-PROT:Q8R0A7|ENSEMBL:ENSMUSP00000034281;ENSMUSP00000104578|REFSEQ:NP_001157232;NP_758490|VEGA:OTTMUSP00000027402;OTTMUSP00000027403 Tax_Id=10090 Gene_Symbol=6430548M08Rik Uncharacterized protein KIAA0513;>IPI:IPI00857896.1|TREMBL:Q3
4.84684	2.69172	4.50979	6.29129	3.26467	4.12014	1.75356	2.0731	NaN	2.9509	1.85093	2.01763	2.74816	2.43528	4.13121	2.77093	2.05994	2.17089	5.69963	2.16076	5.20589	NaN	1.28107	7.39645	700	0.475563	4	8;8;2;1	9	8	Trim3	Tripartite motif-containing protein 3	IPI00129020;IPI00775797	IPI00129020;IPI00775797;IPI00776093;IPI00775876	Q9R1R2	>IPI:IPI00129020.1|SWISS-PROT:Q9R1R2|ENSEMBL:ENSMUSP00000053384;ENSMUSP00000102401|REFSEQ:NP_061368|VEGA:OTTMUSP00000019151;OTTMUSP00000019153 Tax_Id=10090 Gene_Symbol=Trim3 Tripartite motif-containing protein 3;>IPI:IPI00775797.1|TREMBL:Q3TDT0|ENSEMBL:ENS
2.91401	5.25403	2.68283	1.45736	5.48547	3.84202	4.65203	5.82038	4.09752	3.80315	3.38123	3.4024	5.124	4.3433	4.56267	5.68537	1.60241	5.99412	3.67296	0.477145	4.13668	3.26307	4.88711	4.98952	701	0.154421	3	8;7;6	8	8	Anxa7	annexin A7	IPI00114017;IPI00653636;IPI00461322	IPI00114017;IPI00653636;IPI00461322	Q3TT33	>IPI:IPI00114017.2|TREMBL:Q3TT33|ENSEMBL:ENSMUSP00000098405|REFSEQ:NP_001104264;NP_033804 Tax_Id=10090 Gene_Symbol=Anxa7 annexin A7;>IPI:IPI00653636.1|SWISS-PROT:Q07076|TREMBL:Q3TJ49;Q3UYL7;Q8BP75;Q922A2|ENSEMBL:ENSMUSP00000066035 Tax_Id=10090 Gene_Symbol=
6.02918	4.09752	3.59919	3.32336	11.4701	8.08146	6.85119	4.41345	6.87522	7.77605	7.8235	8.21625	3.86145	5.15597	8.82457	5.27232	3.50914	7.5643	10.1207	4.22619	7.8734	9.02608	8.19202	7.17926	702	0.0674933	4	13;12;7;3	16	8	Gnai2	Putative uncharacterized protein	IPI00652902;IPI00228617;IPI00849958	IPI00652902;IPI00228617;IPI00849958;IPI00665576	Q3TXK7;Q8JZT4;Q922Y6	>IPI:IPI00652902.1|TREMBL:Q3TXK7;Q8JZT4;Q922Y6|ENSEMBL:ENSMUSP00000057543|REFSEQ:NP_032164 Tax_Id=10090 Gene_Symbol=Gnai2 Putative uncharacterized protein;>IPI:IPI00228617.6|SWISS-PROT:P08752 Tax_Id=10090 Gene_Symbol=Gnai2 Guanine nucleotide-binding protei
[truncated: 1,410 more rows]
